# Supplementary material
Source: publisher site journal article supplement (https://www.spandidos-publications.com/895/downloadSupplementary)
Supplement: Supplementary file 1 [file downloadSupplementary]

## Sheet: High expression of STAT1
Table SI. GSEA Gene Ontology results. GSEA outcomes of the c2 (c2.all.v6.1.symbols.gmt) reference gene set for the key genes in the Janus kinase-signal transducer and activator of transcription signaling pathway in skin cutaneous melanoma. GSEA, gene set enrichment analysis. GSEA, gene set enrich analysis; GO, gene ontology; ES, enrichment score; NES, normalized enrichment score; NOM, nominal; FD…
Name	Size	ES	NES	NOM P-value	FDR q-value	FWER p-value	Rank to max	Leading Edge
GO_REGULATION_OF_ALPHA_BETA_T_CELL_ACTIVATION	34	0.689253	2.09597	<0.001	0.321744	0.115	2284	tags=68%, list=21%, signal=85%
GO_POSITIVE_REGULATION_OF_ALPHA_BETA_T_CELL_DIFFERENTIATION	21	0.723617	2.09078	<0.001	0.174531	0.125	2284	tags=71%, list=21%, signal=90%
GO_POSITIVE_REGULATION_OF_ALPHA_BETA_T_CELL_ACTIVATION	29	0.695471	2.0715	<0.001	0.160063	0.165	1985	tags=62%, list=18%, signal=76%
GO_POSITIVE_REGULATION_OF_T_CELL_PROLIFERATION	53	0.69372	2.06649	0.00188679	0.12946	0.171	2328	tags=70%, list=21%, signal=88%
GO_REGULATION_OF_ALPHA_BETA_T_CELL_DIFFERENTIATION	23	0.696577	2.0446	<0.001	0.146096	0.222	2284	tags=70%, list=21%, signal=88%
GO_POSITIVE_REGULATION_OF_LYMPHOCYTE_DIFFERENTIATION	48	0.657106	2.02178	0.0019305	0.171347	0.291	2354	tags=69%, list=22%, signal=87%
GO_REGULATION_OF_ADAPTIVE_IMMUNE_RESPONSE	61	0.626065	2.00684	0.00196078	0.182746	0.343	2328	tags=61%, list=21%, signal=77%
GO_POSITIVE_REGULATION_OF_CELL_CELL_ADHESION	150	0.556415	1.98746	0.00196078	0.205787	0.413	2494	tags=53%, list=23%, signal=68%
GO_T_CELL_DIFFERENTIATION	73	0.617673	1.97149	0.00194553	0.223056	0.452	2315	tags=55%, list=21%, signal=69%
GO_LEUKOCYTE_CELL_CELL_ADHESION	132	0.578988	1.96899	0.00383877	0.206313	0.456	2328	tags=53%, list=21%, signal=67%
GO_POSITIVE_REGULATION_OF_CD4_POSITIVE_ALPHA_BETA_T_CELL_ACTIVATION	18	0.720054	1.93048	0.00194932	0.292131	0.597	2284	tags=72%, list=21%, signal=91%
GO_POSITIVE_REGULATION_OF_INTERLEUKIN_12_PRODUCTION	18	0.71039	1.92682	0.00196464	0.279252	0.609	1643	tags=56%, list=15%, signal=65%
GO_REGULATION_OF_CD4_POSITIVE_ALPHA_BETA_T_CELL_ACTIVATION	21	0.695478	1.92583	0.00582524	0.260526	0.614	2284	tags=71%, list=21%, signal=90%
GO_SIDE_OF_MEMBRANE	234	0.482851	1.91985	0.00195312	0.258262	0.63	2505	tags=45%, list=23%, signal=57%
GO_REGULATION_OF_T_CELL_PROLIFERATION	80	0.579073	1.91949	0.013308	0.242082	0.63	2328	tags=56%, list=21%, signal=71%
GO_REGULATION_OF_T_CELL_MEDIATED_IMMUNITY	28	0.654624	1.91269	0.0136986	0.245616	0.652	2328	tags=68%, list=21%, signal=86%
GO_POSITIVE_REGULATION_OF_CELL_ACTIVATION	172	0.547805	1.89891	0.0137525	0.269742	0.694	2494	tags=55%, list=23%, signal=70%
GO_REGULATION_OF_INTERLEUKIN_12_PRODUCTION	29	0.638477	1.89673	0.0118343	0.26092	0.706	1643	tags=45%, list=15%, signal=53%
GO_EXTERNAL_SIDE_OF_PLASMA_MEMBRANE	121	0.551103	1.88977	0.00773694	0.266427	0.729	2505	tags=55%, list=23%, signal=70%
GO_REGULATION_OF_LYMPHOCYTE_MEDIATED_IMMUNITY	59	0.599855	1.88946	0.0117878	0.253852	0.729	2554	tags=61%, list=24%, signal=79%
GO_POSITIVE_REGULATION_OF_LEUKOCYTE_PROLIFERATION	75	0.578977	1.8884	0.0166052	0.244604	0.734	2328	tags=56%, list=21%, signal=71%
GO_NEGATIVE_REGULATION_OF_ADAPTIVE_IMMUNE_RESPONSE	23	0.696946	1.88433	0.00198413	0.242868	0.741	1643	tags=65%, list=15%, signal=77%
GO_POSITIVE_REGULATION_OF_LYMPHOCYTE_MEDIATED_IMMUNITY	36	0.631991	1.88166	0.0135922	0.238334	0.754	2554	tags=67%, list=24%, signal=87%
GO_EXTRINSIC_COMPONENT_OF_PLASMA_MEMBRANE	86	0.453729	1.86718	<0.001	0.264647	0.785	3069	tags=47%, list=28%, signal=64%
GO_POSITIVE_REGULATION_OF_TELOMERASE_ACTIVITY	16	0.615532	1.86678	0.00582524	0.255038	0.787	1805	tags=38%, list=17%, signal=45%
GO_POSITIVE_REGULATION_OF_ADAPTIVE_IMMUNE_RESPONSE	37	0.610432	1.86611	0.00779727	0.246963	0.788	3352	tags=76%, list=31%, signal=109%
GO_POSITIVE_REGULATION_OF_LEUKOCYTE_DIFFERENTIATION	70	0.55617	1.86452	0.00580271	0.241396	0.793	2354	tags=59%, list=22%, signal=74%
GO_REGULATION_OF_HOMOTYPIC_CELL_CELL_ADHESION	174	0.52452	1.86433	0.0155642	0.233248	0.794	2427	tags=49%, list=22%, signal=63%
GO_REGULATION_OF_LEUKOCYTE_MEDIATED_CYTOTOXICITY	35	0.638944	1.86161	0.0213592	0.231271	0.796	1801	tags=54%, list=17%, signal=65%
GO_REGULATION_OF_LEUKOCYTE_MEDIATED_IMMUNITY	83	0.560522	1.85219	0.0138889	0.246942	0.82	2714	tags=58%, list=25%, signal=77%
GO_POSITIVE_REGULATION_OF_LYMPHOCYTE_MIGRATION	18	0.711168	1.84857	0.0151803	0.248168	0.832	2886	tags=89%, list=27%, signal=121%
GO_REGULATION_OF_INTERLEUKIN_1_PRODUCTION	25	0.651846	1.84743	0.0117647	0.243529	0.838	1847	tags=60%, list=17%, signal=72%
GO_POSITIVE_REGULATION_OF_LEUKOCYTE_MEDIATED_IMMUNITY	48	0.589781	1.84291	0.00978474	0.247634	0.846	2554	tags=65%, list=24%, signal=84%
GO_REGULATION_OF_CELL_CELL_ADHESION	222	0.47314	1.8427	0.00959693	0.240708	0.848	2494	tags=45%, list=23%, signal=57%
GO_PHOSPHOLIPASE_A2_ACTIVITY	21	0.617384	1.83606	0.00747664	0.248505	0.86	1455	tags=48%, list=13%, signal=55%
GO_POSITIVE_REGULATION_OF_CELL_KILLING	26	0.663022	1.82985	0.0239044	0.255281	0.869	1801	tags=62%, list=17%, signal=74%
GO_POSITIVE_REGULATION_OF_HEMOPOIESIS	88	0.509367	1.82634	0.00585938	0.256613	0.877	2354	tags=51%, list=22%, signal=65%
GO_REGULATION_OF_CELL_KILLING	41	0.61	1.8209	0.0218688	0.26331	0.887	1801	tags=51%, list=17%, signal=61%
GO_REGULATION_OF_INTERFERON_GAMMA_PRODUCTION	49	0.598272	1.81533	0.0174081	0.269843	0.892	2427	tags=63%, list=22%, signal=81%
GO_VERY_LONG_CHAIN_FATTY_ACID_METABOLIC_PROCESS	18	0.687151	1.81208	0.00379507	0.271443	0.903	1494	tags=50%, list=14%, signal=58%
GO_REGULATION_OF_T_CELL_DIFFERENTIATION	57	0.557152	1.80998	0.00585938	0.270325	0.909	2328	tags=51%, list=21%, signal=64%
GO_LYMPHOCYTE_DIFFERENTIATION	118	0.534465	1.79731	0.0137795	0.297503	0.923	2874	tags=56%, list=27%, signal=75%
GO_REGULATION_OF_LEUKOCYTE_PROLIFERATION	114	0.52231	1.79198	0.0265655	0.304964	0.93	2328	tags=49%, list=21%, signal=62%
GO_ALPHA_BETA_T_CELL_ACTIVATION	30	0.626188	1.79029	0.0120482	0.303216	0.932	1693	tags=50%, list=16%, signal=59%
GO_NON_MEMBRANE_SPANNING_PROTEIN_TYROSINE_KINASE_ACTIVITY	26	0.60574	1.78956	0.0162602	0.29804	0.933	1940	tags=50%, list=18%, signal=61%
GO_REGULATION_OF_LYMPHOCYTE_DIFFERENTIATION	76	0.534884	1.78918	0.0115607	0.292507	0.934	2354	tags=54%, list=22%, signal=68%
GO_LYMPHOCYTE_ACTIVATION	190	0.511822	1.78739	0.0175781	0.290544	0.936	2439	tags=48%, list=23%, signal=61%
GO_REGULATION_OF_STEROID_BIOSYNTHETIC_PROCESS	28	0.546876	1.78654	0.00392157	0.286538	0.937	1703	tags=43%, list=16%, signal=51%
GO_LYMPHOCYTE_COSTIMULATION	49	0.63636	1.78558	0.0352941	0.283	0.939	2427	tags=61%, list=22%, signal=79%
GO_POSITIVE_REGULATION_OF_INTERFERON_GAMMA_PRODUCTION	30	0.643651	1.78325	0.0190114	0.2826	0.939	3069	tags=77%, list=28%, signal=107%
GO_POSITIVE_REGULATION_OF_CYTOKINE_PRODUCTION	199	0.449549	1.77714	0.0135135	0.293364	0.945	2780	tags=47%, list=26%, signal=62%
GO_REGULATION_OF_ACTIVATED_T_CELL_PROLIFERATION	20	0.611078	1.77642	0.0213592	0.289505	0.945	2169	tags=60%, list=20%, signal=75%
GO_LEUKOCYTE_ACTIVATION	224	0.495905	1.77633	0.0217391	0.28425	0.945	2484	tags=46%, list=23%, signal=59%
GO_REGULATION_OF_CELL_ACTIVATION	260	0.475921	1.7762	0.0195695	0.279324	0.945	2387	tags=45%, list=22%, signal=56%
GO_LEUKOCYTE_PROLIFERATION	48	0.569897	1.76661	0.0173745	0.298002	0.955	2231	tags=48%, list=21%, signal=60%
GO_POSITIVE_REGULATION_OF_IMMUNE_EFFECTOR_PROCESS	87	0.483645	1.766	0.0118343	0.294328	0.955	2554	tags=48%, list=24%, signal=63%
GO_POSITIVE_REGULATION_OF_CELL_ADHESION	216	0.453105	1.76419	0.0172084	0.293991	0.957	2505	tags=46%, list=23%, signal=58%
GO_REGULATION_OF_STEROID_METABOLIC_PROCESS	41	0.497944	1.76389	0.00196078	0.289623	0.957	1703	tags=39%, list=16%, signal=46%
GO_POSITIVE_REGULATION_OF_INTERLEUKIN_1_PRODUCTION	16	0.662152	1.76343	0.0214425	0.286038	0.957	2191	tags=69%, list=20%, signal=86%
GO_UNSATURATED_FATTY_ACID_BIOSYNTHETIC_PROCESS	24	0.600116	1.75771	0.00927644	0.295384	0.96	2263	tags=54%, list=21%, signal=68%
GO_NEGATIVE_REGULATION_OF_CYTOKINE_BIOSYNTHETIC_PROCESS	20	0.606568	1.75387	0.00970874	0.301138	0.96	2337	tags=65%, list=22%, signal=83%
GO_EXTRINSIC_COMPONENT_OF_CYTOPLASMIC_SIDE_OF_PLASMA_MEMBRANE	61	0.447863	1.75088	<0.001	0.304373	0.965	3069	tags=49%, list=28%, signal=68%
GO_POSITIVE_REGULATION_OF_STAT_CASCADE	41	0.538251	1.74565	0.00974659	0.312372	0.965	2219	tags=54%, list=20%, signal=67%
GO_REGULATION_OF_LYMPHOCYTE_MIGRATION	23	0.6474	1.74205	0.0246679	0.316736	0.965	2886	tags=78%, list=27%, signal=106%
GO_NEGATIVE_REGULATION_OF_LYMPHOCYTE_MEDIATED_IMMUNITY	23	0.630711	1.74177	0.0256917	0.312695	0.965	1189	tags=43%, list=11%, signal=49%
GO_PURINERGIC_RECEPTOR_SIGNALING_PATHWAY	15	0.710667	1.74041	0.0172414	0.311747	0.965	2494	tags=73%, list=23%, signal=95%
GO_CELLULAR_RESPONSE_TO_INTERFERON_GAMMA	70	0.592597	1.74	0.0467836	0.307994	0.965	2494	tags=54%, list=23%, signal=70%
GO_POSITIVE_REGULATION_OF_T_CELL_MEDIATED_IMMUNITY	18	0.623378	1.73836	0.0333333	0.307325	0.965	2328	tags=67%, list=21%, signal=85%
GO_ACTIVATION_OF_JUN_KINASE_ACTIVITY	19	0.607853	1.73663	0.014553	0.307369	0.967	993	tags=42%, list=9%, signal=46%
GO_REGULATION_OF_NATURAL_KILLER_CELL_MEDIATED_IMMUNITY	23	0.64495	1.73517	0.0385356	0.306746	0.968	1510	tags=48%, list=14%, signal=55%
GO_LEUKOCYTE_DIFFERENTIATION	166	0.479145	1.73389	0.0193798	0.305724	0.968	3017	tags=50%, list=28%, signal=68%
GO_THYMOCYTE_AGGREGATION	25	0.585648	1.73028	0.0133588	0.310673	0.971	1801	tags=44%, list=17%, signal=53%
GO_ALPHA_BETA_T_CELL_DIFFERENTIATION	27	0.62483	1.72881	0.0219124	0.310313	0.973	1174	tags=44%, list=11%, signal=50%
GO_CHEMOKINE_MEDIATED_SIGNALING_PATHWAY	44	0.653296	1.72719	0.0299401	0.310266	0.975	1868	tags=55%, list=17%, signal=66%
GO_REGULATION_OF_TYROSINE_PHOSPHORYLATION_OF_STAT_PROTEIN	40	0.523855	1.7256	0.0156863	0.310065	0.976	2219	tags=50%, list=20%, signal=63%
GO_T_CELL_SELECTION	18	0.756048	1.72537	0.0225873	0.30663	0.977	984	tags=67%, list=9%, signal=73%
GO_CELLULAR_RESPONSE_TO_BIOTIC_STIMULUS	97	0.48899	1.72521	0.0222672	0.303014	0.977	2716	tags=48%, list=25%, signal=64%
GO_TUMOR_NECROSIS_FACTOR_RECEPTOR_SUPERFAMILY_BINDING	23	0.583007	1.72306	0.0178218	0.304152	0.977	1643	tags=43%, list=15%, signal=51%
GO_ANTIGEN_BINDING	51	0.572827	1.72101	0.0350195	0.305314	0.98	2377	tags=51%, list=22%, signal=65%
GO_REGULATION_OF_T_CELL_MEDIATED_CYTOTOXICITY	16	0.686924	1.72045	0.027668	0.302971	0.98	1801	tags=63%, list=17%, signal=75%
GO_CYTOKINE_RECEPTOR_ACTIVITY	50	0.585567	1.72036	0.0277228	0.299582	0.98	2186	tags=56%, list=20%, signal=70%
GO_CELL_ACTIVATION	307	0.444093	1.71935	0.0233918	0.298342	0.98	1855	tags=35%, list=17%, signal=40%
GO_POSITIVE_REGULATION_OF_CYTOKINE_BIOSYNTHETIC_PROCESS	28	0.640737	1.71447	0.0322581	0.30735	0.981	2494	tags=64%, list=23%, signal=83%
GO_REGULATION_OF_CYTOKINE_BIOSYNTHETIC_PROCESS	56	0.542507	1.71265	0.0203252	0.307896	0.981	2337	tags=54%, list=22%, signal=68%
GO_SINGLE_ORGANISM_CELL_ADHESION	259	0.433618	1.71069	0.00585938	0.308899	0.983	2554	tags=41%, list=24%, signal=53%
GO_LEUKOCYTE_MEDIATED_IMMUNITY	78	0.492497	1.70774	0.0255906	0.312245	0.984	2231	tags=49%, list=21%, signal=61%
GO_REGULATION_OF_INTERLEUKIN_4_PRODUCTION	17	0.62416	1.70727	0.015748	0.309883	0.984	2284	tags=59%, list=21%, signal=74%
GO_CYTOPLASMIC_SIDE_OF_MEMBRANE	102	0.392891	1.7031	0.002	0.316712	0.986	2605	tags=36%, list=24%, signal=47%
GO_REGULATION_OF_INTERLEUKIN_10_PRODUCTION	26	0.594908	1.70226	0.0249042	0.315386	0.986	2284	tags=65%, list=21%, signal=83%
GO_CYTOKINE_SECRETION	21	0.613056	1.69823	0.0305927	0.322464	0.989	2191	tags=57%, list=20%, signal=71%
GO_DENDRITIC_CELL_DIFFERENTIATION	20	0.656139	1.69205	0.019802	0.334173	0.99	1766	tags=55%, list=16%, signal=66%
GO_REGULATION_OF_B_CELL_MEDIATED_IMMUNITY	18	0.65069	1.68773	0.0180723	0.341757	0.991	1643	tags=61%, list=15%, signal=72%
GO_REGULATION_OF_MAST_CELL_ACTIVATION	19	0.564951	1.68757	0.012024	0.338525	0.991	724	tags=32%, list=7%, signal=34%
GO_RESPONSE_TO_FATTY_ACID	54	0.456681	1.68756	0.00570342	0.334924	0.991	2679	tags=46%, list=25%, signal=61%
GO_PEPTIDASE_REGULATOR_ACTIVITY	128	0.429156	1.68106	0.00990099	0.34833	0.992	1847	tags=38%, list=17%, signal=45%
GO_REGULATION_OF_INTERLEUKIN_1_BETA_PRODUCTION	21	0.632996	1.67212	0.0340681	0.367577	0.994	2191	tags=62%, list=20%, signal=77%
GO_REGULATION_OF_NATURAL_KILLER_CELL_ACTIVATION	18	0.589557	1.67112	0.0201613	0.366039	0.994	1510	tags=56%, list=14%, signal=64%
GO_NEGATIVE_REGULATION_OF_CYCLIC_NUCLEOTIDE_METABOLIC_PROCESS	21	0.544226	1.67086	0.0144033	0.362853	0.994	2034	tags=43%, list=19%, signal=53%
GO_RESPONSE_TO_INTERFERON_GAMMA	77	0.547699	1.67074	0.065764	0.359587	0.994	2494	tags=51%, list=23%, signal=65%
GO_NEGATIVE_REGULATION_OF_INTERFERON_GAMMA_PRODUCTION	20	0.595533	1.6678	0.0318352	0.364213	0.995	2169	tags=65%, list=20%, signal=81%
GO_CELLULAR_RESPONSE_TO_CYTOKINE_STIMULUS	353	0.4023	1.66686	0.0351562	0.363376	0.995	2578	tags=40%, list=24%, signal=51%
GO_CELLULAR_DEFENSE_RESPONSE	33	0.596959	1.66607	0.0486381	0.361973	0.995	1893	tags=52%, list=17%, signal=62%
GO_LIPID_STORAGE	16	0.576816	1.6643	0.0230326	0.363213	0.995	1253	tags=38%, list=12%, signal=42%
GO_POSITIVE_REGULATION_OF_IMMUNE_SYSTEM_PROCESS	485	0.42187	1.66401	0.0428016	0.360637	0.995	2607	tags=42%, list=24%, signal=53%
GO_REGULATION_OF_ENDOCRINE_PROCESS	29	0.518379	1.66377	0.0117188	0.35786	0.995	1848	tags=45%, list=17%, signal=54%
GO_PEPTIDE_RECEPTOR_ACTIVITY	75	0.463149	1.66154	0.00978474	0.360067	0.996	1944	tags=44%, list=18%, signal=53%
GO_NEGATIVE_REGULATION_OF_NUCLEOTIDE_METABOLIC_PROCESS	35	0.49282	1.65992	0.00417537	0.360795	0.996	2633	tags=46%, list=24%, signal=60%
GO_RESPONSE_TO_PROSTAGLANDIN_E	19	0.572126	1.65831	0.0273973	0.361367	0.996	1782	tags=47%, list=16%, signal=57%
GO_ANTIGEN_PROCESSING_AND_PRESENTATION_OF_PEPTIDE_OR_POLYSACCHARIDE_ANTIGEN_VIA_MHC_CLASS_II	41	0.479226	1.6526	0.0271845	0.372793	0.997	2233	tags=49%, list=21%, signal=61%
GO_PHOSPHATIDYLCHOLINE_ACYL_CHAIN_REMODELING	17	0.585535	1.65151	0.0284091	0.372395	0.997	1344	tags=41%, list=12%, signal=47%
GO_NEGATIVE_REGULATION_OF_LIPID_METABOLIC_PROCESS	41	0.445267	1.64701	0.00972763	0.381524	0.997	2328	tags=41%, list=21%, signal=53%
GO_POSITIVE_REGULATION_OF_LEUKOCYTE_MIGRATION	66	0.501366	1.6449	0.0387597	0.383959	0.997	2588	tags=53%, list=24%, signal=69%
GO_NEGATIVE_REGULATION_OF_LYASE_ACTIVITY	15	0.583833	1.64479	0.0178218	0.380792	0.997	1160	tags=40%, list=11%, signal=45%
GO_INFLAMMATORY_RESPONSE	256	0.452261	1.64385	0.0460653	0.379818	0.997	2530	tags=46%, list=23%, signal=58%
GO_POSITIVE_REGULATION_OF_RESPONSE_TO_WOUNDING	96	0.456454	1.6428	0.0241449	0.379298	0.997	2606	tags=51%, list=24%, signal=67%
GO_CELLULAR_RESPONSE_TO_INORGANIC_SUBSTANCE	81	0.403325	1.64076	0.00581395	0.381847	0.997	2732	tags=43%, list=25%, signal=57%
GO_NEGATIVE_REGULATION_OF_PROTEOLYSIS	197	0.3669	1.63915	0.00609756	0.382902	0.997	1804	tags=29%, list=17%, signal=35%
GO_REGULATION_OF_LEUKOCYTE_MIGRATION	84	0.471767	1.63599	0.0513308	0.389192	0.997	3191	tags=56%, list=29%, signal=79%
GO_LEUKOCYTE_HOMEOSTASIS	30	0.535529	1.63404	0.0570866	0.391107	0.998	2354	tags=47%, list=22%, signal=59%
GO_IMMUNE_EFFECTOR_PROCESS	238	0.424061	1.63366	0.0456349	0.389112	0.998	3369	tags=53%, list=31%, signal=75%
GO_PHOSPHATIDYLETHANOLAMINE_ACYL_CHAIN_REMODELING	17	0.580115	1.63357	0.0314815	0.386087	0.998	1344	tags=41%, list=12%, signal=47%
GO_CYTOKINE_PRODUCTION	70	0.495757	1.63157	0.040619	0.38873	0.998	2568	tags=54%, list=24%, signal=71%
GO_POSITIVE_REGULATION_OF_IMMUNE_RESPONSE	306	0.434539	1.63156	0.0495049	0.385612	0.998	2819	tags=46%, list=26%, signal=61%
GO_REGULATION_OF_INTERFERON_BETA_PRODUCTION	21	0.509735	1.63016	0.0340681	0.386528	0.998	3126	tags=52%, list=29%, signal=73%
GO_PEPTIDYL_TYROSINE_AUTOPHOSPHORYLATION	23	0.575506	1.62372	0.0466531	0.401325	0.998	1940	tags=48%, list=18%, signal=58%
GO_ER_TO_GOLGI_TRANSPORT_VESICLE_MEMBRANE	28	0.548468	1.62359	0.0551181	0.398598	0.998	2340	tags=50%, list=22%, signal=64%
GO_NEGATIVE_REGULATION_OF_BLOOD_PRESSURE	24	0.523261	1.62071	0.016632	0.403278	0.998	2593	tags=54%, list=24%, signal=71%
GO_PHOSPHOLIPASE_C_ACTIVATING_G_PROTEIN_COUPLED_RECEPTOR_SIGNALING_PATHWAY	54	0.459311	1.62047	0.00770713	0.40074	0.998	1982	tags=41%, list=18%, signal=50%
GO_RESPONSE_TO_PROSTAGLANDIN	24	0.528902	1.6193	0.0234834	0.401385	0.998	1782	tags=42%, list=16%, signal=50%
GO_LYMPHOCYTE_MEDIATED_IMMUNITY	55	0.477739	1.61888	0.0665362	0.3996	0.998	2141	tags=45%, list=20%, signal=56%
GO_CELL_CELL_RECOGNITION	37	0.46338	1.61885	0.019802	0.39658	0.998	2292	tags=49%, list=21%, signal=62%
GO_POSITIVE_REGULATION_OF_INTERLEUKIN_2_PRODUCTION	16	0.61831	1.61688	0.0385356	0.399179	0.998	2328	tags=56%, list=21%, signal=72%
GO_POSITIVE_REGULATION_OF_LEUKOCYTE_CHEMOTAXIS	50	0.521403	1.61618	0.038	0.397989	0.998	1868	tags=46%, list=17%, signal=55%
GO_REGULATION_OF_LEUKOCYTE_CHEMOTAXIS	58	0.508834	1.61613	0.0436508	0.395139	0.998	2588	tags=52%, list=24%, signal=68%
GO_RESPONSE_TO_CYTOKINE	417	0.381658	1.61575	0.0399202	0.393229	0.998	2554	tags=38%, list=24%, signal=48%
GO_POSITIVE_REGULATION_OF_INFLAMMATORY_RESPONSE	71	0.485553	1.61555	0.0433925	0.390908	0.998	2588	tags=55%, list=24%, signal=72%
GO_T_CELL_HOMEOSTASIS	19	0.568863	1.61497	0.0589391	0.389563	0.998	2354	tags=47%, list=22%, signal=60%
GO_CELLULAR_RESPONSE_TO_DRUG	38	0.455576	1.61259	0.0169173	0.393446	0.998	2578	tags=45%, list=24%, signal=59%
GO_REGULATION_OF_CALCIUM_MEDIATED_SIGNALING	45	0.447379	1.61192	0.0289575	0.392379	0.998	1998	tags=36%, list=18%, signal=43%
GO_POSITIVE_REGULATION_OF_ACUTE_INFLAMMATORY_RESPONSE	17	0.600691	1.61124	0.0452756	0.391289	0.998	2484	tags=71%, list=23%, signal=91%
GO_CHEMOKINE_RECEPTOR_BINDING	35	0.571632	1.60997	0.0603113	0.392176	0.998	2074	tags=43%, list=19%, signal=53%
GO_REGULATION_OF_THE_FORCE_OF_HEART_CONTRACTION	20	0.538658	1.60804	0.0216535	0.39455	0.998	3135	tags=50%, list=29%, signal=70%
GO_POSITIVE_REGULATION_OF_PEPTIDYL_TYROSINE_PHOSPHORYLATION	88	0.424106	1.60785	0.0212766	0.39228	0.998	2300	tags=39%, list=21%, signal=49%
GO_MOVEMENT_IN_ENVIRONMENT_OF_OTHER_ORGANISM_INVOLVED_IN_SYMBIOTIC_INTERACTION	44	0.463156	1.60419	0.0386847	0.399685	0.998	2505	tags=45%, list=23%, signal=59%
GO_EXTRINSIC_COMPONENT_OF_MEMBRANE	155	0.355981	1.60413	0.00787402	0.39711	0.998	2109	tags=29%, list=19%, signal=36%
GO_MAINTENANCE_OF_LOCATION	78	0.392949	1.60409	0.0178926	0.39455	0.998	2884	tags=45%, list=27%, signal=61%
GO_UNSATURATED_FATTY_ACID_METABOLIC_PROCESS	53	0.492473	1.60345	0.0135135	0.393514	0.998	1663	tags=38%, list=15%, signal=44%
GO_FATTY_ACID_DERIVATIVE_TRANSPORT	16	0.552801	1.60272	0.0329457	0.392963	0.998	2445	tags=50%, list=23%, signal=64%
GO_REGULATION_OF_CYTOKINE_PRODUCTION	318	0.384775	1.60185	0.0390625	0.392518	0.998	3289	tags=47%, list=30%, signal=66%
GO_ADAPTIVE_IMMUNE_RESPONSE	130	0.507233	1.60093	0.0807087	0.392311	0.998	2710	tags=52%, list=25%, signal=69%
GO_REGULATION_OF_PEPTIDYL_TYROSINE_PHOSPHORYLATION	121	0.402112	1.6007	0.0248092	0.390341	0.998	2300	tags=37%, list=21%, signal=47%
GO_CELL_ACTIVATION_INVOLVED_IN_IMMUNE_RESPONSE	69	0.491635	1.59909	0.0670611	0.391801	0.998	2231	tags=43%, list=21%, signal=54%
GO_EXTRINSIC_APOPTOTIC_SIGNALING_PATHWAY	63	0.398659	1.59839	0.0163599	0.390974	0.998	2607	tags=43%, list=24%, signal=56%
GO_NEGATIVE_REGULATION_OF_PEPTIDASE_ACTIVITY	149	0.392161	1.59772	0.0141988	0.390083	0.998	1804	tags=32%, list=17%, signal=38%
GO_REGULATION_OF_LEUKOCYTE_DIFFERENTIATION	128	0.441233	1.59755	0.0524272	0.38807	0.998	2501	tags=46%, list=23%, signal=59%
GO_CD4_POSITIVE_ALPHA_BETA_T_CELL_ACTIVATION	22	0.581128	1.59552	0.0575397	0.391104	0.998	3437	tags=64%, list=32%, signal=93%
GO_PEPTIDASE_INHIBITOR_ACTIVITY	105	0.43507	1.59491	0.0182927	0.390337	0.998	1804	tags=38%, list=17%, signal=45%
GO_RESPONSE_TO_BIOTIC_STIMULUS	459	0.363967	1.59425	0.0139721	0.389465	0.998	2781	tags=41%, list=26%, signal=52%
GO_INTERFERON_GAMMA_MEDIATED_SIGNALING_PATHWAY	36	0.60639	1.59325	0.10058	0.389621	0.998	2494	tags=53%, list=23%, signal=68%
GO_CYTOKINE_MEDIATED_SIGNALING_PATHWAY	256	0.428383	1.5905	0.0657371	0.394406	0.998	2554	tags=41%, list=24%, signal=53%
GO_POSITIVE_REGULATION_OF_ACTIN_FILAMENT_POLYMERIZATION	34	0.460835	1.58861	0.0389105	0.396539	0.998	2248	tags=44%, list=21%, signal=56%
GO_REGULATION_OF_HEMOPOIESIS	174	0.40676	1.58824	0.0392157	0.394941	0.998	2501	tags=41%, list=23%, signal=52%
GO_POSITIVE_REGULATION_OF_DEFENSE_RESPONSE	218	0.411785	1.58724	0.0529412	0.395158	0.998	2819	tags=45%, list=26%, signal=60%
GO_PROTEIN_KINASE_B_SIGNALING	22	0.51743	1.58565	0.0329218	0.396994	0.998	3147	tags=59%, list=29%, signal=83%
GO_REGULATION_OF_SYNCYTIUM_FORMATION_BY_PLASMA_MEMBRANE_FUSION	16	0.650754	1.58538	0.0267686	0.39538	0.998	2275	tags=63%, list=21%, signal=79%
GO_B_CELL_MEDIATED_IMMUNITY	35	0.533019	1.58522	0.0691057	0.393433	0.998	2377	tags=54%, list=22%, signal=69%
GO_TUMOR_NECROSIS_FACTOR_RECEPTOR_BINDING	15	0.629427	1.58519	0.0489237	0.391124	0.998	1643	tags=47%, list=15%, signal=55%
GO_NEGATIVE_REGULATION_OF_GENE_EXPRESSION_EPIGENETIC	61	0.453095	1.58358	0.0496032	0.393086	0.998	2793	tags=46%, list=26%, signal=62%
GO_REGULATION_OF_IMMUNE_EFFECTOR_PROCESS	235	0.366305	1.58345	0.034	0.391087	0.998	2499	tags=36%, list=23%, signal=46%
GO_RESPONSE_TO_MOLECULE_OF_BACTERIAL_ORIGIN	178	0.415525	1.58302	0.0301205	0.389946	0.998	2781	tags=45%, list=26%, signal=59%
GO_RESPONSE_TO_ACTIVITY	43	0.445115	1.5822	0.00793651	0.389782	0.998	2505	tags=44%, list=23%, signal=57%
GO_IMMUNE_SYSTEM_DEVELOPMENT	330	0.368797	1.58208	0.0272374	0.387834	0.998	2463	tags=37%, list=23%, signal=46%
GO_REGULATION_OF_CELL_ADHESION	356	0.369851	1.57982	0.0209524	0.391137	0.998	2505	tags=38%, list=23%, signal=48%
GO_IMMUNOGLOBULIN_PRODUCTION	23	0.510738	1.57879	0.041502	0.39173	0.998	1565	tags=39%, list=14%, signal=46%
GO_INNATE_IMMUNE_RESPONSE	309	0.435373	1.57867	0.0618763	0.389763	0.998	3369	tags=55%, list=31%, signal=77%
GO_CELL_SURFACE	407	0.366086	1.57838	0.0330739	0.388295	0.998	2877	tags=42%, list=27%, signal=55%
GO_CHROMATIN_SILENCING	48	0.479256	1.57737	0.0492813	0.388631	0.998	2753	tags=48%, list=25%, signal=64%
GO_REGULATION_OF_RECEPTOR_ACTIVITY	63	0.407174	1.57656	0.03	0.388415	0.998	1458	tags=27%, list=13%, signal=31%
GO_POSITIVE_REGULATION_OF_IMMUNOGLOBULIN_PRODUCTION	15	0.600175	1.57618	0.0441767	0.38725	0.998	3437	tags=73%, list=32%, signal=107%
GO_CELLULAR_RESPONSE_TO_INTERLEUKIN_4	16	0.562171	1.57487	0.0386965	0.388482	0.998	2554	tags=56%, list=24%, signal=74%
GO_CYTOKINE_BINDING	47	0.468954	1.57402	0.0297619	0.388625	0.998	2098	tags=43%, list=19%, signal=53%
GO_REGULATION_OF_LYMPHOCYTE_CHEMOTAXIS	15	0.650427	1.57083	0.0671785	0.394355	0.998	3147	tags=80%, list=29%, signal=113%
GO_KERATINOCYTE_DIFFERENTIATION	61	0.61292	1.57002	0.109344	0.394255	0.998	1733	tags=59%, list=16%, signal=70%
GO_POSITIVE_REGULATION_OF_RECEPTOR_MEDIATED_ENDOCYTOSIS	33	0.460157	1.56975	0.0204082	0.392758	0.998	2713	tags=45%, list=25%, signal=60%
GO_EPIDERMAL_CELL_DIFFERENTIATION	81	0.548747	1.56823	0.0983936	0.394558	0.998	1733	tags=48%, list=16%, signal=57%
GO_CYTOKINE_RECEPTOR_BINDING	141	0.397546	1.56789	0.0196464	0.393323	0.998	2082	tags=34%, list=19%, signal=42%
GO_NEGATIVE_REGULATION_OF_TUMOR_NECROSIS_FACTOR_SUPERFAMILY_CYTOKINE_PRODUCTION	25	0.54117	1.56664	0.0389864	0.394509	0.998	1155	tags=36%, list=11%, signal=40%
GO_PEPTIDE_CROSS_LINKING	30	0.752709	1.56655	0.107356	0.392676	0.998	1270	tags=70%, list=12%, signal=79%
GO_REGULATION_OF_TYPE_I_INTERFERON_PRODUCTION	59	0.413737	1.56437	0.0513834	0.396008	0.998	3362	tags=44%, list=31%, signal=64%
GO_STAT_CASCADE	25	0.49433	1.56437	0.0153846	0.39393	0.998	2186	tags=48%, list=20%, signal=60%
GO_FATTY_ACID_BIOSYNTHETIC_PROCESS	52	0.42717	1.56284	0.0362595	0.395868	0.998	2503	tags=40%, list=23%, signal=52%
GO_MYELOID_CELL_ACTIVATION_INVOLVED_IN_IMMUNE_RESPONSE	19	0.568814	1.56192	0.0444874	0.396186	0.998	2231	tags=58%, list=21%, signal=73%
GO_REGULATION_OF_CYTOKINE_SECRETION	76	0.452707	1.56175	0.065764	0.394618	0.998	2328	tags=45%, list=21%, signal=57%
GO_NEGATIVE_REGULATION_OF_LEUKOCYTE_MEDIATED_IMMUNITY	26	0.560603	1.56046	0.0593047	0.39603	0.998	1189	tags=38%, list=11%, signal=43%
GO_REGULATION_OF_PROTEIN_AUTOPHOSPHORYLATION	26	0.497808	1.559	0.0478927	0.397567	0.998	1970	tags=35%, list=18%, signal=42%
GO_RESPONSE_TO_BACTERIUM	263	0.393813	1.55612	0.021611	0.403202	0.998	2840	tags=46%, list=26%, signal=60%
GO_ADAPTIVE_IMMUNE_RESPONSE_BASED_ON_SOMATIC_RECOMBINATION_OF_IMMUNE_RECEPTORS_BUILT_FROM_IMMUNOGLOBULIN_SUPERFAMILY_DOMAINS	65	0.482131	1.55538	0.0793651	0.403085	0.999	3437	tags=62%, list=32%, signal=90%
GO_EPITHELIAL_CELL_DIFFERENTIATION	285	0.388846	1.5553	0.0365854	0.401343	0.999	2531	tags=40%, list=23%, signal=50%
GO_POSITIVE_REGULATION_OF_TYROSINE_PHOSPHORYLATION_OF_STAT3_PROTEIN	20	0.519539	1.55141	0.0327553	0.409875	0.999	2098	tags=50%, list=19%, signal=62%
GO_DIGESTIVE_SYSTEM_PROCESS	38	0.463682	1.54889	0.0188679	0.414401	0.999	1553	tags=37%, list=14%, signal=43%
GO_REGULATION_OF_BONE_REMODELING	22	0.53305	1.54676	0.0490798	0.417834	0.999	2216	tags=50%, list=20%, signal=63%
GO_T_CELL_DIFFERENTIATION_INVOLVED_IN_IMMUNE_RESPONSE	18	0.573738	1.54645	0.0810277	0.416583	0.999	3437	tags=67%, list=32%, signal=98%
GO_REGULATION_OF_PRODUCTION_OF_MOLECULAR_MEDIATOR_OF_IMMUNE_RESPONSE	52	0.45882	1.54631	0.0525253	0.414959	0.999	2284	tags=44%, list=21%, signal=56%
GO_LYMPHOCYTE_HOMEOSTASIS	25	0.518547	1.5448	0.0841487	0.416942	0.999	2354	tags=44%, list=22%, signal=56%
GO_NEGATIVE_REGULATION_OF_CHEMOTAXIS	28	0.493381	1.54414	0.0433925	0.416417	0.999	3734	tags=64%, list=34%, signal=98%
GO_REGULATION_OF_CHEMOTAXIS	103	0.434702	1.54354	0.0591716	0.416048	0.999	2799	tags=48%, list=26%, signal=64%
GO_REGULATION_OF_RECEPTOR_MEDIATED_ENDOCYTOSIS	49	0.409618	1.54281	0.0338645	0.415959	0.999	2713	tags=39%, list=25%, signal=52%
GO_REGULATION_OF_PEPTIDASE_ACTIVITY	245	0.352763	1.54097	0.0142857	0.418912	0.999	1847	tags=30%, list=17%, signal=35%
GO_PHOSPHOLIPID_BINDING	188	0.32672	1.53949	0.0193424	0.421029	1	2220	tags=29%, list=21%, signal=36%
GO_REGULATION_OF_LEUKOCYTE_DEGRANULATION	24	0.508786	1.53734	0.0476191	0.4246	1	2714	tags=50%, list=25%, signal=67%
GO_CELL_CELL_ADHESION	332	0.375792	1.53729	0.0338983	0.422718	1	2554	tags=38%, list=24%, signal=48%
GO_REGULATION_OF_ANTIGEN_RECEPTOR_MEDIATED_SIGNALING_PATHWAY	24	0.550003	1.53718	0.0702087	0.421002	1	607	tags=25%, list=6%, signal=26%
GO_REGULATION_OF_B_CELL_DIFFERENTIATION	18	0.601242	1.53691	0.0721248	0.419807	1	2354	tags=61%, list=22%, signal=78%
GO_REGULATION_OF_IMMUNE_RESPONSE	455	0.397831	1.53618	0.0870406	0.419573	1	2853	tags=42%, list=26%, signal=55%
GO_POSITIVE_REGULATION_OF_CELL_GROWTH	75	0.362338	1.5358	0.0200401	0.418666	1	2858	tags=40%, list=26%, signal=54%
GO_MHC_PROTEIN_COMPLEX	16	0.743333	1.53544	0.0787402	0.417715	1	2204	tags=75%, list=20%, signal=94%
GO_PHOSPHATIDYLCHOLINE_METABOLIC_PROCESS	38	0.426293	1.53533	0.035461	0.416035	1	1344	tags=29%, list=12%, signal=33%
GO_REGULATION_OF_TYROSINE_PHOSPHORYLATION_OF_STAT3_PROTEIN	26	0.479102	1.53518	0.040404	0.414508	1	2098	tags=46%, list=19%, signal=57%
GO_NEGATIVE_REGULATION_OF_T_CELL_DIFFERENTIATION	16	0.568069	1.53278	0.0582707	0.418467	1	1643	tags=38%, list=15%, signal=44%
GO_MITOTIC_SPINDLE_ORGANIZATION	35	0.511598	1.52932	0.104283	0.42569	1	3650	tags=60%, list=34%, signal=90%
GO_ACID_SECRETION	36	0.421982	1.52896	0.023622	0.424703	1	1373	tags=31%, list=13%, signal=35%
GO_CORNIFIED_ENVELOPE	25	0.8042	1.52844	0.103239	0.424176	1	1270	tags=80%, list=12%, signal=90%
GO_REGULATION_OF_BODY_FLUID_LEVELS	277	0.35714	1.52778	0.0300601	0.424116	1	2615	tags=36%, list=24%, signal=46%
GO_LEUKOCYTE_DEGRANULATION	15	0.599125	1.52721	0.0670611	0.423706	1	2231	tags=67%, list=21%, signal=84%
GO_REGULATION_OF_IMMUNOGLOBULIN_PRODUCTION	21	0.545886	1.52536	0.06639	0.426643	1	1643	tags=43%, list=15%, signal=50%
GO_REGULATION_OF_MAST_CELL_ACTIVATION_INVOLVED_IN_IMMUNE_RESPONSE	16	0.542512	1.52397	0.0478088	0.428112	1	724	tags=31%, list=7%, signal=33%
GO_T_CELL_RECEPTOR_SIGNALING_PATHWAY	86	0.458849	1.52395	0.119923	0.426312	1	2819	tags=43%, list=26%, signal=58%
GO_PHOSPHATIDYLINOSITOL_4_5_BISPHOSPHATE_BINDING	22	0.477514	1.52352	0.0410678	0.425583	1	2203	tags=45%, list=20%, signal=57%
GO_NEGATIVE_REGULATION_OF_CELLULAR_RESPONSE_TO_INSULIN_STIMULUS	21	0.488635	1.5235	0.0277186	0.423769	1	2449	tags=48%, list=23%, signal=61%
GO_CELL_RECOGNITION	76	0.38461	1.52287	0.0170778	0.423601	1	2478	tags=42%, list=23%, signal=54%
GO_ADRENAL_GLAND_DEVELOPMENT	15	0.534032	1.52181	0.0511811	0.424401	1	1626	tags=40%, list=15%, signal=47%
GO_MITOTIC_SPINDLE_ASSEMBLY	21	0.525212	1.52175	0.0651769	0.422701	1	3650	tags=52%, list=34%, signal=79%
GO_T_CELL_ACTIVATION_INVOLVED_IN_IMMUNE_RESPONSE	26	0.517804	1.52135	0.088	0.421901	1	2048	tags=46%, list=19%, signal=57%
GO_PHOSPHATIDYLSERINE_METABOLIC_PROCESS	19	0.486706	1.52091	0.053407	0.421264	1	2353	tags=37%, list=22%, signal=47%
GO_REGULATION_OF_T_CELL_RECEPTOR_SIGNALING_PATHWAY	17	0.545611	1.52031	0.0570342	0.42111	1	607	tags=24%, list=6%, signal=25%
GO_CHEMOKINE_ACTIVITY	30	0.560445	1.51829	0.0903733	0.424704	1	1868	tags=40%, list=17%, signal=48%
GO_NEGATIVE_REGULATION_OF_OSTEOCLAST_DIFFERENTIATION	18	0.557862	1.51695	0.0651341	0.426462	1	1830	tags=44%, list=17%, signal=53%
GO_DEFENSE_RESPONSE_TO_OTHER_ORGANISM	250	0.358223	1.51566	0.0183299	0.428202	1	2499	tags=38%, list=23%, signal=49%
GO_POSITIVE_REGULATION_OF_RESPONSE_TO_EXTERNAL_STIMULUS	175	0.390392	1.51505	0.0509804	0.427949	1	2530	tags=42%, list=23%, signal=54%
GO_RESPONSE_TO_WOUNDING	312	0.33591	1.51485	0.0174081	0.426669	1	2834	tags=37%, list=26%, signal=48%
GO_POSITIVE_REGULATION_OF_GLIAL_CELL_DIFFERENTIATION	15	0.555222	1.51444	0.0503876	0.425904	1	2349	tags=60%, list=22%, signal=77%
GO_CELLULAR_RESPONSE_TO_FATTY_ACID	34	0.458956	1.51364	0.0429907	0.426214	1	2503	tags=47%, list=23%, signal=61%
GO_POSITIVE_REGULATION_OF_PROTEIN_AUTOPHOSPHORYLATION	16	0.539845	1.51205	0.0569745	0.428595	1	1805	tags=38%, list=17%, signal=45%
GO_ORGAN_REGENERATION	45	0.411431	1.5117	0.0232558	0.427721	1	3806	tags=60%, list=35%, signal=92%
GO_REGULATION_OF_DNA_RECOMBINATION	34	0.440095	1.51121	0.0474308	0.427248	1	2663	tags=44%, list=25%, signal=58%
GO_HETEROTYPIC_CELL_CELL_ADHESION	18	0.553071	1.51078	0.0609982	0.42663	1	1925	tags=44%, list=18%, signal=54%
GO_PRODUCTION_OF_MOLECULAR_MEDIATOR_OF_IMMUNE_RESPONSE	35	0.43852	1.51077	0.0528376	0.424926	1	2568	tags=43%, list=24%, signal=56%
GO_RESPONSE_TO_ANTIBIOTIC	27	0.46817	1.50994	0.0495049	0.425269	1	2802	tags=48%, list=26%, signal=65%
GO_CELL_CHEMOTAXIS	94	0.442667	1.50952	0.0773694	0.424648	1	2328	tags=41%, list=21%, signal=52%
GO_REGULATION_OF_PROTEIN_KINASE_B_SIGNALING	76	0.372696	1.50947	0.0261569	0.423081	1	2472	tags=36%, list=23%, signal=46%
GO_REGULATION_OF_CYTOKINE_PRODUCTION_INVOLVED_IN_IMMUNE_RESPONSE	32	0.479776	1.5094	0.0755467	0.421621	1	2284	tags=47%, list=21%, signal=59%
GO_CYTOKINE_ACTIVITY	115	0.419155	1.5082	0.0588235	0.423023	1	1957	tags=36%, list=18%, signal=43%
GO_POSITIVE_REGULATION_OF_CYTOKINE_SECRETION	52	0.443833	1.50723	0.0776699	0.42356	1	2463	tags=44%, list=23%, signal=57%
GO_REGULATION_OF_MEMBRANE_PROTEIN_ECTODOMAIN_PROTEOLYSIS	16	0.529607	1.50637	0.0696325	0.424009	1	2328	tags=56%, list=21%, signal=72%
GO_MYELOID_LEUKOCYTE_MIGRATION	61	0.466674	1.50561	0.0760456	0.424193	1	2548	tags=48%, list=24%, signal=62%
GO_SERINE_TYPE_ENDOPEPTIDASE_INHIBITOR_ACTIVITY	58	0.477889	1.50544	0.0680412	0.422907	1	1804	tags=43%, list=17%, signal=51%
GO_ANTIGEN_PROCESSING_AND_PRESENTATION	108	0.421175	1.50513	0.104331	0.421986	1	2954	tags=49%, list=27%, signal=67%
GO_PLASMA_MEMBRANE_RECEPTOR_COMPLEX	98	0.393082	1.50287	0.0503018	0.425711	1	1947	tags=36%, list=18%, signal=43%
GO_ESTABLISHMENT_OF_ENDOTHELIAL_BARRIER	16	0.510149	1.50276	0.0666667	0.424406	1	2472	tags=44%, list=23%, signal=57%
GO_POSITIVE_REGULATION_OF_TRANSCRIPTION_FACTOR_IMPORT_INTO_NUCLEUS	29	0.482458	1.49926	0.0701403	0.431104	1	2874	tags=45%, list=27%, signal=61%
GO_MYELOID_DENDRITIC_CELL_ACTIVATION	15	0.600038	1.49917	0.0704501	0.429644	1	1693	tags=47%, list=16%, signal=55%
GO_NEGATIVE_REGULATION_OF_HYDROLASE_ACTIVITY	234	0.332049	1.49899	0.0104384	0.428408	1	1804	tags=27%, list=17%, signal=32%
GO_LONG_TERM_MEMORY	16	0.509428	1.49661	0.0480769	0.432664	1	3071	tags=63%, list=28%, signal=87%
GO_MYELOID_LEUKOCYTE_ACTIVATION	48	0.485024	1.49612	0.0901961	0.432292	1	2484	tags=48%, list=23%, signal=62%
GO_ANTIGEN_RECEPTOR_MEDIATED_SIGNALING_PATHWAY	108	0.454052	1.49548	0.128205	0.432248	1	2819	tags=44%, list=26%, signal=59%
GO_ENZYME_INHIBITOR_ACTIVITY	208	0.333745	1.4954	0.0176125	0.43079	1	2004	tags=31%, list=19%, signal=37%
GO_NEGATIVE_REGULATION_OF_CELL_CELL_ADHESION	75	0.394236	1.49502	0.0509434	0.430345	1	2172	tags=36%, list=20%, signal=45%
GO_CCR_CHEMOKINE_RECEPTOR_BINDING	24	0.604789	1.49318	0.111546	0.433506	1	1830	tags=46%, list=17%, signal=55%
GO_WOUND_HEALING	260	0.340082	1.49316	0.0179641	0.431969	1	2834	tags=37%, list=26%, signal=49%
GO_NEGATIVE_REGULATION_OF_INTERLEUKIN_6_PRODUCTION	19	0.575641	1.49255	0.0924855	0.431936	1	1489	tags=42%, list=14%, signal=49%
GO_NEGATIVE_REGULATION_OF_LEUKOCYTE_PROLIFERATION	39	0.482915	1.49002	0.0958904	0.436581	1	2169	tags=46%, list=20%, signal=58%
GO_GRANULOCYTE_MIGRATION	43	0.50502	1.48997	0.107407	0.435048	1	2548	tags=51%, list=24%, signal=67%
GO_RESPONSE_TO_INTERLEUKIN_4	20	0.50509	1.48992	0.0691057	0.43356	1	2554	tags=50%, list=24%, signal=65%
GO_POSITIVE_REGULATION_OF_PRODUCTION_OF_MOLECULAR_MEDIATOR_OF_IMMUNE_RESPONSE	35	0.460039	1.48892	0.074364	0.43475	1	1834	tags=40%, list=17%, signal=48%
GO_REGULATION_OF_ACTIN_FILAMENT_LENGTH	82	0.358317	1.48886	0.0395257	0.433324	1	2248	tags=34%, list=21%, signal=43%
GO_POSITIVE_REGULATION_OF_CYTOKINESIS	16	0.533336	1.48868	0.0746562	0.432203	1	1639	tags=38%, list=15%, signal=44%
GO_REGULATION_OF_RESPONSE_TO_INTERFERON_GAMMA	15	0.54987	1.48863	0.0833333	0.430774	1	1853	tags=47%, list=17%, signal=56%
GO_NEGATIVE_REGULATION_OF_CYTOKINE_SECRETION	23	0.518412	1.4878	0.0964083	0.431235	1	1766	tags=48%, list=16%, signal=57%
GO_POSITIVE_REGULATION_OF_PEPTIDASE_ACTIVITY	99	0.347362	1.48778	0.0361446	0.429756	1	2999	tags=44%, list=28%, signal=61%
GO_ACTIVATION_OF_CYSTEINE_TYPE_ENDOPEPTIDASE_ACTIVITY	56	0.375293	1.48741	0.0462777	0.429178	1	2122	tags=36%, list=20%, signal=44%
GO_RECEPTOR_SIGNALING_COMPLEX_SCAFFOLD_ACTIVITY	18	0.479521	1.4861	0.0564202	0.431001	1	1267	tags=33%, list=12%, signal=38%
GO_REGULATION_OF_INTERLEUKIN_2_PRODUCTION	26	0.528678	1.48465	0.101887	0.432961	1	3069	tags=62%, list=28%, signal=86%
GO_RESPONSE_TO_HEAT	54	0.379381	1.48364	0.0275049	0.434089	1	2328	tags=31%, list=21%, signal=40%
GO_REGULATION_OF_INTRINSIC_APOPTOTIC_SIGNALING_PATHWAY_BY_P53_CLASS_MEDIATOR	16	0.481501	1.48259	0.0572597	0.435048	1	2073	tags=44%, list=19%, signal=54%
GO_PLATELET_ACTIVATION	82	0.409163	1.48095	0.0645161	0.437772	1	1477	tags=26%, list=14%, signal=29%
GO_NEGATIVE_REGULATION_OF_CYTOKINE_PRODUCTION	131	0.377512	1.48068	0.0751445	0.436932	1	3263	tags=47%, list=30%, signal=67%
GO_POSITIVE_REGULATION_OF_TYPE_I_INTERFERON_PRODUCTION	31	0.412062	1.47957	0.0517928	0.438115	1	2713	tags=42%, list=25%, signal=56%
GO_REGULATION_OF_ERYTHROCYTE_DIFFERENTIATION	23	0.483333	1.47764	0.0606061	0.441213	1	3655	tags=57%, list=34%, signal=85%
GO_IMMUNE_RESPONSE_REGULATING_CELL_SURFACE_RECEPTOR_SIGNALING_PATHWAY	177	0.409013	1.47746	0.131783	0.440111	1	2819	tags=41%, list=26%, signal=54%
GO_NEGATIVE_REGULATION_OF_AXON_GUIDANCE	15	0.543769	1.47255	0.0946746	0.450891	1	3348	tags=60%, list=31%, signal=87%
GO_RESPONSE_TO_METAL_ION	185	0.320555	1.47173	0.0155945	0.451338	1	2838	tags=40%, list=26%, signal=53%
GO_NEGATIVE_REGULATION_OF_CELL_ACTIVATION	82	0.416494	1.47112	0.0833333	0.451329	1	2349	tags=41%, list=22%, signal=53%
GO_T_CELL_PROLIFERATION	19	0.51707	1.47101	0.100746	0.450069	1	3337	tags=58%, list=31%, signal=84%
GO_UDP_GALACTOSYLTRANSFERASE_ACTIVITY	17	0.522227	1.47078	0.049676	0.449082	1	3212	tags=53%, list=30%, signal=75%
GO_DEFENSE_RESPONSE_TO_BACTERIUM	104	0.413888	1.46909	0.0379242	0.451925	1	2886	tags=54%, list=27%, signal=73%
GO_ESTABLISHMENT_OF_CELL_POLARITY	49	0.39202	1.46424	0.056	0.462694	1	1601	tags=27%, list=15%, signal=31%
GO_CYTOPLASMIC_MRNA_PROCESSING_BODY	32	0.415116	1.46394	0.0859539	0.461829	1	3763	tags=59%, list=35%, signal=91%
GO_REGULATION_OF_GRANULOCYTE_CHEMOTAXIS	25	0.513657	1.46292	0.088632	0.462868	1	2484	tags=48%, list=23%, signal=62%
GO_REGULATION_OF_DEFENSE_RESPONSE	431	0.340495	1.46261	0.0805501	0.462174	1	2505	tags=34%, list=23%, signal=43%
GO_FATTY_ACID_DERIVATIVE_METABOLIC_PROCESS	49	0.474801	1.46036	0.0659794	0.466691	1	2302	tags=41%, list=21%, signal=52%
GO_TISSUE_MIGRATION	46	0.399659	1.45975	0.0476191	0.466742	1	2098	tags=43%, list=19%, signal=54%
GO_NEGATIVE_REGULATION_OF_LEUKOCYTE_APOPTOTIC_PROCESS	24	0.514841	1.45919	0.101338	0.466642	1	2484	tags=54%, list=23%, signal=70%
GO_POSITIVE_REGULATION_OF_PROTEIN_POLYMERIZATION	44	0.389627	1.45824	0.0566406	0.467567	1	1624	tags=32%, list=15%, signal=37%
GO_REGULATION_OF_NEUTROPHIL_CHEMOTAXIS	16	0.558926	1.45737	0.0885827	0.468276	1	2328	tags=50%, list=21%, signal=64%
GO_ACTIVATION_OF_IMMUNE_RESPONSE	227	0.401158	1.45706	0.133072	0.467483	1	2886	tags=44%, list=27%, signal=58%
GO_MYELOID_LEUKOCYTE_MEDIATED_IMMUNITY	23	0.484629	1.45658	0.0683594	0.467353	1	2781	tags=61%, list=26%, signal=82%
GO_POSITIVE_REGULATION_OF_PROTEIN_KINASE_B_SIGNALING	51	0.387935	1.45657	0.0667976	0.465847	1	2269	tags=35%, list=21%, signal=44%
GO_G_PROTEIN_COUPLED_RECEPTOR_SIGNALING_PATHWAY_COUPLED_TO_CYCLIC_NUCLEOTIDE_SECOND_MESSENGER	95	0.382858	1.45526	0.0402414	0.467705	1	2034	tags=36%, list=19%, signal=44%
GO_NEGATIVE_REGULATION_OF_HOMEOSTATIC_PROCESS	74	0.364039	1.45473	0.0603774	0.467547	1	2713	tags=35%, list=25%, signal=47%
GO_ACTIVATION_OF_PROTEIN_KINASE_ACTIVITY	162	0.324246	1.45465	0.0279441	0.466237	1	2661	tags=36%, list=25%, signal=47%
GO_LEUKOCYTE_MIGRATION	147	0.405326	1.45349	0.0963391	0.46778	1	2834	tags=44%, list=26%, signal=58%
GO_NEGATIVE_REGULATION_OF_FATTY_ACID_METABOLIC_PROCESS	15	0.497243	1.45339	0.0727273	0.466492	1	3414	tags=53%, list=32%, signal=78%
GO_NEGATIVE_REGULATION_OF_IMMUNE_SYSTEM_PROCESS	220	0.358144	1.45305	0.0846154	0.465843	1	2175	tags=32%, list=20%, signal=39%
GO_RESPONSE_TO_TUMOR_NECROSIS_FACTOR	145	0.378738	1.45236	0.0823293	0.466044	1	3362	tags=47%, list=31%, signal=67%
GO_MYELOID_LEUKOCYTE_DIFFERENTIATION	58	0.394968	1.45146	0.074364	0.467047	1	3017	tags=40%, list=28%, signal=55%
GO_ACTIVATION_OF_MAPK_ACTIVITY	80	0.36286	1.45069	0.0608519	0.467487	1	2347	tags=33%, list=22%, signal=41%
GO_REGULATION_OF_RESPONSE_TO_WOUNDING	229	0.360346	1.44941	0.0644531	0.469149	1	2242	tags=35%, list=21%, signal=44%
GO_PHOSPHOLIPID_CATABOLIC_PROCESS	22	0.454931	1.44689	0.071028	0.47429	1	3347	tags=50%, list=31%, signal=72%
GO_REGULATION_OF_LEUKOCYTE_APOPTOTIC_PROCESS	43	0.447296	1.44549	0.125237	0.476526	1	2955	tags=51%, list=27%, signal=70%
GO_GALACTOSYLTRANSFERASE_ACTIVITY	19	0.482305	1.44533	0.0617284	0.475459	1	2316	tags=37%, list=21%, signal=47%
GO_REGULATION_OF_INSULIN_RECEPTOR_SIGNALING_PATHWAY	27	0.434212	1.44498	0.0536082	0.474923	1	2449	tags=44%, list=23%, signal=57%
GO_RESPONSE_TO_LITHIUM_ION	18	0.469432	1.44483	0.0590551	0.473852	1	2763	tags=50%, list=26%, signal=67%
GO_DIVALENT_INORGANIC_CATION_HOMEOSTASIS	198	0.340793	1.44482	0.0298211	0.472398	1	3329	tags=47%, list=31%, signal=67%
GO_REGULATION_OF_BONE_RESORPTION	18	0.5122	1.44433	0.0970297	0.472127	1	2216	tags=44%, list=20%, signal=56%
GO_HISTONE_PHOSPHORYLATION	15	0.535658	1.44363	0.0943026	0.472619	1	4289	tags=73%, list=40%, signal=121%
GO_CLATHRIN_BINDING	33	0.394527	1.44333	0.0654397	0.471973	1	2740	tags=36%, list=25%, signal=49%
GO_LEUKOCYTE_CHEMOTAXIS	67	0.467752	1.44217	0.116959	0.473462	1	2548	tags=48%, list=24%, signal=62%
GO_POSITIVE_REGULATION_OF_CHEMOTAXIS	75	0.426484	1.44168	0.103718	0.473309	1	2799	tags=48%, list=26%, signal=64%
GO_EPITHELIAL_CELL_DEVELOPMENT	107	0.349736	1.44017	0.0473373	0.475801	1	2472	tags=32%, list=23%, signal=41%
GO_ACTIN_MYOSIN_FILAMENT_SLIDING	22	0.600942	1.43949	0.0949495	0.476114	1	2763	tags=68%, list=26%, signal=91%
GO_HEMOSTASIS	171	0.341219	1.43921	0.0609756	0.47531	1	2733	tags=36%, list=25%, signal=48%
GO_LONG_CHAIN_FATTY_ACID_METABOLIC_PROCESS	49	0.424715	1.43858	0.0627451	0.475597	1	2321	tags=39%, list=21%, signal=49%
GO_UBIQUITIN_LIKE_PROTEIN_BINDING	63	0.341259	1.4385	0.0472441	0.474419	1	1630	tags=22%, list=15%, signal=26%
GO_REGULATION_OF_VASODILATION	30	0.44135	1.43808	0.0758197	0.474083	1	2494	tags=53%, list=23%, signal=69%
GO_CELL_DIVISION_SITE	26	0.439477	1.43804	0.101313	0.472789	1	2110	tags=38%, list=19%, signal=48%
GO_REGULATION_OF_ANTIGEN_PROCESSING_AND_PRESENTATION	16	0.575155	1.4377	0.135496	0.472125	1	2886	tags=69%, list=27%, signal=94%
GO_ETHANOLAMINE_CONTAINING_COMPOUND_METABOLIC_PROCESS	50	0.37998	1.43769	0.05	0.47075	1	1468	tags=26%, list=14%, signal=30%
GO_REGULATION_OF_MYELOID_CELL_DIFFERENTIATION	103	0.356746	1.43724	0.0872093	0.470491	1	2971	tags=42%, list=27%, signal=57%
GO_POSITIVE_REGULATION_OF_INNATE_IMMUNE_RESPONSE	145	0.386338	1.43633	0.115914	0.471457	1	2819	tags=43%, list=26%, signal=57%
GO_LYMPHOCYTE_ACTIVATION_INVOLVED_IN_IMMUNE_RESPONSE	48	0.45088	1.43597	0.139265	0.47099	1	3437	tags=56%, list=32%, signal=82%
GO_REGULATION_OF_LIPID_STORAGE	24	0.462803	1.43458	0.0800781	0.473132	1	2067	tags=42%, list=19%, signal=51%
GO_LIPID_PARTICLE	34	0.421111	1.43436	0.0945674	0.472325	1	2999	tags=44%, list=28%, signal=61%
GO_SPINDLE_MIDZONE	18	0.523473	1.43436	0.110251	0.470953	1	2387	tags=50%, list=22%, signal=64%
GO_I_KAPPAB_KINASE_NF_KAPPAB_SIGNALING	38	0.436714	1.43393	0.125954	0.470447	1	3541	tags=53%, list=33%, signal=78%
GO_RECEPTOR_COMPLEX	176	0.344022	1.43357	0.0475248	0.469932	1	1947	tags=29%, list=18%, signal=35%
GO_EPIDERMIS_MORPHOGENESIS	19	0.547506	1.43259	0.0755467	0.471148	1	1385	tags=42%, list=13%, signal=48%
GO_REGULATION_OF_INTERLEUKIN_6_PRODUCTION	57	0.441923	1.43061	0.122807	0.474953	1	2499	tags=46%, list=23%, signal=59%
GO_NEGATIVE_REGULATION_OF_IMMUNE_RESPONSE	74	0.408976	1.43055	0.11412	0.473744	1	1243	tags=30%, list=11%, signal=33%
GO_MACROMOLECULAR_COMPLEX_REMODELING	15	0.514997	1.42999	0.0752033	0.473779	1	1360	tags=40%, list=13%, signal=46%
GO_REGULATION_OF_JUN_KINASE_ACTIVITY	53	0.380228	1.42935	0.0625	0.47403	1	1141	tags=26%, list=11%, signal=29%
GO_NEGATIVE_REGULATION_OF_MYELOID_CELL_DIFFERENTIATION	54	0.37517	1.42846	0.0667976	0.475058	1	2753	tags=41%, list=25%, signal=54%
GO_POSITIVE_REGULATION_OF_ERYTHROCYTE_DIFFERENTIATION	16	0.494439	1.4284	0.0811321	0.473892	1	3655	tags=63%, list=34%, signal=94%
GO_REGULATION_OF_AXON_GUIDANCE	17	0.507119	1.42774	0.11002	0.474241	1	3348	tags=53%, list=31%, signal=77%
GO_POSITIVE_REGULATION_OF_LOCOMOTION	232	0.336412	1.42746	0.059387	0.473623	1	2680	tags=38%, list=25%, signal=49%
GO_SKIN_DEVELOPMENT	122	0.466153	1.42389	0.139344	0.481341	1	1767	tags=42%, list=16%, signal=49%
GO_REGULATION_OF_CYTOSOLIC_CALCIUM_ION_CONCENTRATION	121	0.362661	1.42304	0.0607211	0.482087	1	2328	tags=39%, list=21%, signal=49%
GO_VIRUS_RECEPTOR_ACTIVITY	35	0.437456	1.42303	0.0836735	0.480745	1	2505	tags=46%, list=23%, signal=59%
GO_TEMPERATURE_HOMEOSTASIS	21	0.469006	1.42265	0.0576541	0.48046	1	2593	tags=38%, list=24%, signal=50%
GO_KERATINIZATION	30	0.715227	1.42239	0.15735	0.479764	1	1577	tags=70%, list=15%, signal=82%
GO_AMINE_METABOLIC_PROCESS	75	0.34607	1.42236	0.0562852	0.478495	1	1468	tags=23%, list=14%, signal=26%
GO_SYNCYTIUM_FORMATION	16	0.530701	1.42088	0.0978474	0.480919	1	1811	tags=44%, list=17%, signal=52%
GO_GROWTH_FACTOR_RECEPTOR_BINDING	71	0.373103	1.42013	0.0625	0.481521	1	2008	tags=34%, list=19%, signal=41%
GO_PLACENTA_DEVELOPMENT	73	0.374566	1.4189	0.0725191	0.483237	1	2150	tags=34%, list=20%, signal=42%
GO_POSITIVE_REGULATION_OF_CELL_PROLIFERATION	465	0.298743	1.41822	0.0244361	0.483569	1	2506	tags=34%, list=23%, signal=42%
GO_NEGATIVE_REGULATION_OF_SECRETION	105	0.340031	1.4179	0.0462963	0.483079	1	2830	tags=39%, list=26%, signal=52%
GO_CELLULAR_RESPONSE_TO_INTERLEUKIN_1	55	0.41456	1.41653	0.116371	0.485371	1	3291	tags=51%, list=30%, signal=73%
GO_ENDOTHELIAL_CELL_MIGRATION	29	0.438973	1.41558	0.0686869	0.486428	1	1925	tags=45%, list=18%, signal=54%
GO_REGULATION_OF_ENDOCYTOSIS	118	0.342247	1.4154	0.0708661	0.485606	1	2886	tags=42%, list=27%, signal=56%
GO_RECEPTOR_INTERNALIZATION	23	0.472255	1.41528	0.0994152	0.48457	1	1925	tags=39%, list=18%, signal=47%
GO_REGULATION_OF_INFLAMMATORY_RESPONSE	172	0.363206	1.41518	0.0978474	0.483576	1	2242	tags=37%, list=21%, signal=45%
GO_PROTEIN_HETEROTETRAMERIZATION	19	0.527463	1.41405	0.144016	0.485088	1	2753	tags=53%, list=25%, signal=70%
GO_PHOSPHATIDYLSERINE_BINDING	15	0.497517	1.41254	0.0886793	0.487539	1	2208	tags=40%, list=20%, signal=50%
GO_REGULATION_OF_PROTEOLYSIS	426	0.285449	1.41226	0.0163934	0.486945	1	1858	tags=25%, list=17%, signal=29%
GO_G_PROTEIN_COUPLED_RECEPTOR_ACTIVITY	245	0.338154	1.41018	0.0590551	0.490832	1	1982	tags=34%, list=18%, signal=41%
GO_NEGATIVE_REGULATION_OF_RECEPTOR_ACTIVITY	19	0.466834	1.40812	0.0876494	0.495098	1	1070	tags=26%, list=10%, signal=29%
GO_NEGATIVE_REGULATION_OF_HEMOPOIESIS	76	0.361895	1.40643	0.0670498	0.498085	1	2753	tags=39%, list=25%, signal=53%
GO_NEGATIVE_REGULATION_OF_HOMOTYPIC_CELL_CELL_ADHESION	53	0.41388	1.40589	0.10728	0.498084	1	2172	tags=40%, list=20%, signal=49%
GO_REGULATION_OF_PLASMA_LIPOPROTEIN_PARTICLE_LEVELS	25	0.442258	1.40511	0.0943775	0.49871	1	1360	tags=36%, list=13%, signal=41%
GO_REGENERATION	95	0.332797	1.40457	0.043222	0.49884	1	3837	tags=54%, list=35%, signal=82%
GO_HEMATOPOIETIC_PROGENITOR_CELL_DIFFERENTIATION	58	0.365878	1.4029	0.0718447	0.502008	1	3164	tags=47%, list=29%, signal=65%
GO_ESTABLISHMENT_OF_SPINDLE_ORIENTATION	15	0.489606	1.40196	0.100858	0.503154	1	1601	tags=33%, list=15%, signal=39%
GO_REGULATION_OF_PROTEIN_TYROSINE_KINASE_ACTIVITY	39	0.391708	1.40094	0.0700389	0.504463	1	1805	tags=31%, list=17%, signal=37%
GO_NEGATIVE_REGULATION_OF_GTPASE_ACTIVITY	27	0.408575	1.40067	0.0918164	0.503884	1	3012	tags=44%, list=28%, signal=61%
GO_BINDING_OF_SPERM_TO_ZONA_PELLUCIDA	22	0.460076	1.40037	0.10978	0.503323	1	2257	tags=50%, list=21%, signal=63%
GO_POSITIVE_REGULATION_OF_NEUTROPHIL_MIGRATION	16	0.531703	1.3996	0.123506	0.503927	1	2328	tags=56%, list=21%, signal=72%
GO_REGULATION_OF_GENE_SILENCING	31	0.414403	1.39927	0.100193	0.503417	1	2386	tags=42%, list=22%, signal=54%
GO_REGULATION_OF_LIPID_BIOSYNTHETIC_PROCESS	71	0.358454	1.39909	0.0546559	0.502574	1	2328	tags=38%, list=21%, signal=48%
GO_POSITIVE_REGULATION_OF_INTERLEUKIN_8_PRODUCTION	26	0.451986	1.39848	0.0874752	0.50286	1	2499	tags=42%, list=23%, signal=55%
GO_CORE_PROMOTER_BINDING	101	0.340182	1.39645	0.0874752	0.506824	1	3106	tags=43%, list=29%, signal=59%
GO_POSITIVE_REGULATION_OF_PHOSPHATIDYLINOSITOL_3_KINASE_SIGNALING	29	0.417595	1.39601	0.0655106	0.50673	1	2735	tags=45%, list=25%, signal=60%
GO_PEPTIDASE_ACTIVATOR_ACTIVITY	24	0.404992	1.39537	0.0833333	0.507188	1	2886	tags=50%, list=27%, signal=68%
GO_REGULATION_OF_NEUTROPHIL_MIGRATION	18	0.521001	1.39529	0.12749	0.506119	1	2328	tags=50%, list=21%, signal=64%
GO_NEGATIVE_REGULATION_OF_T_CELL_PROLIFERATION	29	0.452445	1.39393	0.147573	0.508314	1	2169	tags=45%, list=20%, signal=56%
GO_MYOBLAST_DIFFERENTIATION	20	0.447268	1.39242	0.0887097	0.511013	1	2275	tags=40%, list=21%, signal=51%
GO_MATERNAL_PROCESS_INVOLVED_IN_FEMALE_PREGNANCY	31	0.396378	1.39201	0.0900563	0.510743	1	2340	tags=39%, list=22%, signal=49%
GO_CELLULAR_RESPONSE_TO_LIPID	271	0.306042	1.39171	0.0335306	0.510195	1	3165	tags=39%, list=29%, signal=54%
GO_MONOCYTE_CHEMOTAXIS	29	0.507095	1.39137	0.139764	0.509819	1	1830	tags=41%, list=17%, signal=50%
GO_POSITIVE_REGULATION_OF_EPITHELIAL_CELL_MIGRATION	55	0.376726	1.39112	0.0874525	0.509226	1	2530	tags=40%, list=23%, signal=52%
GO_CALCIUM_ION_IMPORT_INTO_CYTOSOL	26	0.428732	1.39076	0.102161	0.508885	1	607	tags=23%, list=6%, signal=24%
GO_G_PROTEIN_COUPLED_RECEPTOR_SIGNALING_PATHWAY	416	0.317867	1.39042	0.0613861	0.508515	1	2236	tags=31%, list=21%, signal=38%
GO_RESPONSE_TO_INORGANIC_SUBSTANCE	279	0.291354	1.3889	0.023622	0.511177	1	2838	tags=36%, list=26%, signal=47%
GO_PROTEASE_BINDING	54	0.369531	1.38876	0.0889328	0.510324	1	2145	tags=33%, list=20%, signal=41%
GO_B_CELL_PROLIFERATION	16	0.551347	1.38864	0.145631	0.509373	1	1015	tags=38%, list=9%, signal=41%
GO_REGULATION_OF_CELLULAR_RESPONSE_TO_INSULIN_STIMULUS	37	0.38456	1.38792	0.0808679	0.510038	1	2607	tags=38%, list=24%, signal=50%
GO_REGULATION_OF_PROTEIN_SECRETION	201	0.318902	1.38787	0.0867052	0.508962	1	2681	tags=37%, list=25%, signal=48%
GO_AMEBOIDAL_TYPE_CELL_MIGRATION	88	0.346623	1.38759	0.0690335	0.508334	1	2098	tags=35%, list=19%, signal=43%
GO_PROTEIN_OLIGOMERIZATION	249	0.280178	1.38502	0.0318091	0.51373	1	2606	tags=31%, list=24%, signal=39%
GO_LYMPHOCYTE_MIGRATION	29	0.549542	1.38444	0.168297	0.514053	1	3291	tags=62%, list=30%, signal=89%
GO_DIGESTION	79	0.397431	1.38275	0.0737052	0.517282	1	1553	tags=33%, list=14%, signal=38%
GO_BASAL_PART_OF_CELL	29	0.418279	1.38204	0.0952381	0.517855	1	2834	tags=48%, list=26%, signal=65%
GO_B_CELL_ACTIVATION_INVOLVED_IN_IMMUNE_RESPONSE	20	0.504562	1.38191	0.144603	0.516899	1	3338	tags=55%, list=31%, signal=79%
GO_NEGATIVE_REGULATION_OF_INTRINSIC_APOPTOTIC_SIGNALING_PATHWAY_IN_RESPONSE_TO_DNA_DAMAGE	17	0.445456	1.38165	0.113169	0.516353	1	2073	tags=41%, list=19%, signal=51%
GO_CYSTEINE_TYPE_ENDOPEPTIDASE_REGULATOR_ACTIVITY_INVOLVED_IN_APOPTOTIC_PROCESS	21	0.431724	1.37917	0.115619	0.521261	1	3682	tags=57%, list=34%, signal=86%
GO_NEGATIVE_REGULATION_OF_SIGNAL_TRANSDUCTION_BY_P53_CLASS_MEDIATOR	20	0.411564	1.37722	0.0931174	0.525097	1	2073	tags=40%, list=19%, signal=49%
GO_REGULATION_OF_SEQUESTERING_OF_CALCIUM_ION	64	0.365956	1.37616	0.110454	0.526598	1	1030	tags=20%, list=10%, signal=22%
GO_SPINDLE_POLE	74	0.365331	1.37578	0.13215	0.526412	1	2338	tags=31%, list=22%, signal=39%
GO_REGULATION_OF_FILOPODIUM_ASSEMBLY	19	0.454028	1.3747	0.111324	0.528071	1	607	tags=26%, list=6%, signal=28%
GO_NEGATIVE_REGULATION_OF_SMOOTH_MUSCLE_CELL_PROLIFERATION	24	0.434868	1.37259	0.105159	0.53206	1	2253	tags=46%, list=21%, signal=58%
GO_ZYMOGEN_ACTIVATION	67	0.345189	1.3708	0.0796646	0.535526	1	2122	tags=33%, list=20%, signal=41%
GO_REGULATION_OF_LIPID_METABOLIC_PROCESS	155	0.308176	1.37067	0.0511364	0.534646	1	2387	tags=34%, list=22%, signal=43%
GO_SH2_DOMAIN_BINDING	17	0.485001	1.36954	0.154286	0.536425	1	1681	tags=41%, list=16%, signal=49%
GO_CELLULAR_RESPONSE_TO_MECHANICAL_STIMULUS	45	0.390868	1.36862	0.10297	0.537618	1	2875	tags=40%, list=27%, signal=54%
GO_REGULATION_OF_TUMOR_NECROSIS_FACTOR_SUPERFAMILY_CYTOKINE_PRODUCTION	55	0.444616	1.36838	0.162476	0.537039	1	2216	tags=36%, list=20%, signal=45%
GO_REGULATION_OF_SECRETION	369	0.293053	1.36763	0.045977	0.537719	1	2733	tags=36%, list=25%, signal=46%
GO_REGULATION_OF_ERK1_AND_ERK2_CASCADE	141	0.349071	1.36753	0.123077	0.536672	1	2338	tags=33%, list=22%, signal=42%
GO_NEGATIVE_REGULATION_OF_PROTEIN_SECRETION	56	0.372223	1.36522	0.104972	0.541566	1	2328	tags=36%, list=21%, signal=45%
GO_REGULATION_OF_INTRINSIC_APOPTOTIC_SIGNALING_PATHWAY_IN_RESPONSE_TO_DNA_DAMAGE	22	0.426086	1.36329	0.108333	0.545222	1	2073	tags=41%, list=19%, signal=50%
GO_ESTABLISHMENT_OR_MAINTENANCE_OF_CELL_POLARITY	78	0.339024	1.36249	0.0745698	0.546058	1	1936	tags=28%, list=18%, signal=34%
GO_REGULATION_OF_STAT_CASCADE	75	0.347383	1.36237	0.0992063	0.545048	1	2336	tags=39%, list=22%, signal=49%
GO_REGULATION_OF_PHOSPHOLIPID_METABOLIC_PROCESS	34	0.400425	1.36129	0.121387	0.546644	1	2607	tags=47%, list=24%, signal=62%
GO_RENAL_SYSTEM_PROCESS_INVOLVED_IN_REGULATION_OF_SYSTEMIC_ARTERIAL_BLOOD_PRESSURE	15	0.524671	1.36114	0.11022	0.545745	1	1848	tags=53%, list=17%, signal=64%
GO_POSITIVE_REGULATION_OF_PHOSPHOLIPID_METABOLIC_PROCESS	22	0.446721	1.36106	0.152305	0.544737	1	2387	tags=50%, list=22%, signal=64%
GO_POSITIVE_REGULATION_OF_AXON_EXTENSION	16	0.480319	1.35971	0.114823	0.546995	1	1858	tags=38%, list=17%, signal=45%
GO_DEFENSE_RESPONSE_TO_GRAM_NEGATIVE_BACTERIUM	31	0.440422	1.35927	0.107486	0.546939	1	2886	tags=55%, list=27%, signal=75%
GO_HUMORAL_IMMUNE_RESPONSE	80	0.408407	1.3581	0.130879	0.548855	1	2486	tags=45%, list=23%, signal=58%
GO_RESPONSE_TO_VIRUS	137	0.340949	1.35723	0.149402	0.550002	1	2541	tags=36%, list=23%, signal=46%
GO_TRANS_GOLGI_NETWORK_MEMBRANE	48	0.359893	1.35689	0.0983936	0.549627	1	1269	tags=23%, list=12%, signal=26%
GO_TOLL_LIKE_RECEPTOR_SIGNALING_PATHWAY	47	0.413585	1.35686	0.158203	0.548442	1	2159	tags=38%, list=20%, signal=48%
GO_LYMPHOCYTE_CHEMOTAXIS	23	0.558171	1.35478	0.199219	0.552735	1	3291	tags=61%, list=30%, signal=87%
GO_RESPONSE_TO_CADMIUM_ION	22	0.441212	1.35379	0.111546	0.554114	1	2253	tags=45%, list=21%, signal=57%
GO_POSITIVE_REGULATION_OF_LIPID_KINASE_ACTIVITY	17	0.496748	1.35367	0.142857	0.55316	1	2387	tags=59%, list=22%, signal=75%
GO_POSITIVE_REGULATION_OF_CELL_MATRIX_ADHESION	25	0.39014	1.35233	0.0974155	0.555563	1	2285	tags=48%, list=21%, signal=61%
GO_REGULATION_OF_CALCIUM_ION_TRANSPORT_INTO_CYTOSOL	52	0.377593	1.35203	0.114943	0.555158	1	3158	tags=44%, list=29%, signal=62%
GO_IMMUNOLOGICAL_SYNAPSE	17	0.529628	1.35069	0.200382	0.55766	1	984	tags=47%, list=9%, signal=52%
GO_REGULATION_OF_LAMELLIPODIUM_ORGANIZATION	17	0.441092	1.34936	0.115152	0.560014	1	452	tags=18%, list=4%, signal=18%
GO_TUMOR_NECROSIS_FACTOR_MEDIATED_SIGNALING_PATHWAY	71	0.409245	1.34835	0.177645	0.561475	1	2886	tags=46%, list=27%, signal=63%
GO_TRANSCRIPTIONAL_REPRESSOR_ACTIVITY_RNA_POLYMERASE_II_TRANSCRIPTION_REGULATORY_REGION_SEQUENCE_SPECIFIC_BINDING	103	0.318867	1.34738	0.0927419	0.562713	1	2876	tags=37%, list=27%, signal=50%
GO_EPIDERMIS_DEVELOPMENT	142	0.437223	1.34721	0.171026	0.56196	1	1767	tags=39%, list=16%, signal=46%
GO_PEPTIDYL_TYROSINE_MODIFICATION	101	0.333819	1.34534	0.0933333	0.565711	1	2203	tags=33%, list=20%, signal=41%
GO_CARBOXYLIC_ESTER_HYDROLASE_ACTIVITY	66	0.344546	1.34406	0.0930233	0.567833	1	2009	tags=32%, list=19%, signal=39%
GO_HISTONE_BINDING	101	0.341789	1.3438	0.133205	0.567231	1	3133	tags=41%, list=29%, signal=57%
GO_COATED_VESICLE_MEMBRANE	71	0.352538	1.34324	0.119141	0.567414	1	3128	tags=44%, list=29%, signal=61%
GO_POSITIVE_REGULATION_OF_ENDOCYTOSIS	73	0.343987	1.34302	0.111111	0.566751	1	2886	tags=44%, list=27%, signal=59%
GO_MYOSIN_BINDING	29	0.408544	1.34112	0.142857	0.570584	1	2886	tags=45%, list=27%, signal=61%
GO_MULTICELLULAR_ORGANISMAL_WATER_HOMEOSTASIS	35	0.462242	1.34092	0.169043	0.569912	1	3340	tags=66%, list=31%, signal=95%
GO_CELL_MOTILITY	477	0.29047	1.34056	0.0796964	0.569766	1	2104	tags=28%, list=19%, signal=33%
GO_PROTEIN_SECRETION	64	0.352562	1.34045	0.103448	0.568801	1	2191	tags=36%, list=20%, signal=45%
GO_MANGANESE_ION_BINDING	32	0.357637	1.33934	0.104651	0.570593	1	1993	tags=28%, list=18%, signal=34%
GO_REGULATION_OF_OSTEOCLAST_DIFFERENTIATION	38	0.426198	1.33666	0.145957	0.576851	1	1830	tags=37%, list=17%, signal=44%
GO_O_GLYCAN_PROCESSING	38	0.403435	1.33577	0.132673	0.578163	1	3251	tags=50%, list=30%, signal=71%
GO_POSITIVE_REGULATION_OF_MYELOID_CELL_DIFFERENTIATION	41	0.385946	1.33559	0.120388	0.577477	1	2484	tags=41%, list=23%, signal=54%
GO_PROTEIN_HETEROOLIGOMERIZATION	55	0.355976	1.3352	0.107724	0.577209	1	2753	tags=38%, list=25%, signal=51%
GO_INTERACTION_WITH_HOST	69	0.352304	1.33478	0.12334	0.577138	1	2505	tags=35%, list=23%, signal=45%
GO_PHOSPHATIDYLINOSITOL_PHOSPHATE_BINDING	62	0.33838	1.33366	0.108949	0.579023	1	1735	tags=27%, list=16%, signal=32%
GO_HUMORAL_IMMUNE_RESPONSE_MEDIATED_BY_CIRCULATING_IMMUNOGLOBULIN	22	0.494069	1.33342	0.194118	0.578469	1	2377	tags=55%, list=22%, signal=70%
GO_NEGATIVE_REGULATION_OF_NF_KAPPAB_TRANSCRIPTION_FACTOR_ACTIVITY	33	0.399438	1.33159	0.145098	0.582414	1	1155	tags=27%, list=11%, signal=30%
GO_POSITIVE_REGULATION_OF_WOUND_HEALING	26	0.421071	1.33154	0.135307	0.581338	1	1191	tags=31%, list=11%, signal=34%
GO_REGULATION_OF_TRANSCRIPTION_FACTOR_IMPORT_INTO_NUCLEUS	50	0.35836	1.33139	0.125984	0.580533	1	2610	tags=34%, list=24%, signal=45%
GO_LIPID_BINDING	343	0.281318	1.33097	0.0472441	0.580478	1	2220	tags=27%, list=21%, signal=33%
GO_POSITIVE_REGULATION_OF_ERK1_AND_ERK2_CASCADE	103	0.360312	1.33059	0.151803	0.580184	1	1830	tags=29%, list=17%, signal=35%
GO_CELLULAR_HORMONE_METABOLIC_PROCESS	60	0.415146	1.32919	0.101961	0.582876	1	1386	tags=28%, list=13%, signal=32%
GO_VASCULOGENESIS	26	0.42626	1.32907	0.134766	0.581974	1	3215	tags=54%, list=30%, signal=76%
GO_CALCIUM_CHANNEL_REGULATOR_ACTIVITY	21	0.427445	1.32839	0.109312	0.582534	1	1930	tags=33%, list=18%, signal=40%
GO_NEGATIVE_REGULATION_OF_CELL_DEATH	498	0.262297	1.32762	0.0271845	0.583406	1	2607	tags=31%, list=24%, signal=39%
GO_REGULATION_OF_HORMONE_LEVELS	253	0.29679	1.32657	0.0528376	0.585205	1	2858	tags=38%, list=26%, signal=50%
GO_REGULATION_OF_INNATE_IMMUNE_RESPONSE	203	0.349423	1.32652	0.183071	0.584136	1	2834	tags=38%, list=26%, signal=51%
GO_OXIDOREDUCTASE_ACTIVITY_ACTING_ON_PAIRED_DONORS_WITH_INCORPORATION_OR_REDUCTION_OF_MOLECULAR_OXYGEN_NAD_P_H_AS_ONE_DONOR_AND_INCORPORATION_OF_ONE_ATOM_OF_OXYGEN	23	0.502795	1.32513	0.156126	0.586866	1	2134	tags=48%, list=20%, signal=59%
GO_REGULATION_OF_TELOMERASE_ACTIVITY	22	0.392936	1.32409	0.107843	0.588537	1	1805	tags=27%, list=17%, signal=33%
GO_CELLULAR_EXTRAVASATION	15	0.536527	1.32288	0.196429	0.590578	1	2231	tags=53%, list=21%, signal=67%
GO_REGULATION_OF_RESPONSE_TO_BIOTIC_STIMULUS	136	0.298075	1.32247	0.101031	0.590409	1	2499	tags=31%, list=23%, signal=40%
GO_REGULATION_OF_CELLULAR_COMPONENT_MOVEMENT	420	0.289932	1.32218	0.0935114	0.589954	1	2799	tags=35%, list=26%, signal=46%
GO_ION_HOMEOSTASIS	327	0.284547	1.32102	0.0458891	0.591874	1	2253	tags=29%, list=21%, signal=36%
GO_HEPATICOBILIARY_SYSTEM_DEVELOPMENT	76	0.309345	1.31942	0.0756972	0.59492	1	2553	tags=32%, list=24%, signal=41%
GO_NEGATIVE_REGULATION_OF_PRODUCTION_OF_MOLECULAR_MEDIATOR_OF_IMMUNE_RESPONSE	15	0.501502	1.31861	0.150685	0.595991	1	434	tags=27%, list=4%, signal=28%
GO_HORMONE_METABOLIC_PROCESS	91	0.375078	1.3183	0.083503	0.595592	1	1386	tags=27%, list=13%, signal=31%
GO_REGULATION_OF_EPITHELIAL_CELL_MIGRATION	78	0.334039	1.31801	0.117202	0.595129	1	1895	tags=31%, list=18%, signal=37%
GO_NEGATIVE_REGULATION_OF_CATALYTIC_ACTIVITY	482	0.263611	1.31722	0.0305499	0.596002	1	1804	tags=23%, list=17%, signal=26%
GO_ER_TO_GOLGI_TRANSPORT_VESICLE	40	0.39615	1.31696	0.167331	0.595445	1	2941	tags=48%, list=27%, signal=65%
GO_ADENYLATE_CYCLASE_ACTIVATING_G_PROTEIN_COUPLED_RECEPTOR_SIGNALING_PATHWAY	36	0.394783	1.31543	0.142566	0.598429	1	1782	tags=33%, list=16%, signal=40%
GO_B_CELL_ACTIVATION	74	0.385538	1.31491	0.181275	0.59867	1	2315	tags=36%, list=21%, signal=46%
GO_NEGATIVE_REGULATION_OF_LEUKOCYTE_DIFFERENTIATION	52	0.378056	1.31467	0.134215	0.598146	1	2607	tags=40%, list=24%, signal=53%
GO_CELL_PROLIFERATION	397	0.278539	1.31451	0.0753296	0.597398	1	2150	tags=27%, list=20%, signal=32%
GO_REGULATION_OF_NF_KAPPAB_IMPORT_INTO_NUCLEUS	26	0.437761	1.31374	0.176015	0.598321	1	2874	tags=46%, list=27%, signal=63%
GO_NEGATIVE_REGULATION_OF_PEPTIDE_SECRETION	24	0.403166	1.31329	0.105368	0.59834	1	2553	tags=38%, list=24%, signal=49%
GO_INTERMEDIATE_FILAMENT_BASED_PROCESS	25	0.458317	1.31328	0.121951	0.597149	1	3148	tags=52%, list=29%, signal=73%
GO_NADP_METABOLIC_PROCESS	16	0.432693	1.31244	0.15493	0.598277	1	2671	tags=38%, list=25%, signal=50%
GO_STEM_CELL_PROLIFERATION	43	0.367265	1.31119	0.122711	0.600533	1	1999	tags=33%, list=18%, signal=40%
GO_POSITIVE_REGULATION_OF_B_CELL_ACTIVATION	41	0.429994	1.31078	0.220703	0.600454	1	2554	tags=46%, list=24%, signal=60%
GO_POSITIVE_REGULATION_OF_INTERLEUKIN_6_PRODUCTION	35	0.40944	1.3098	0.159555	0.601932	1	2886	tags=51%, list=27%, signal=70%
GO_CYSTEINE_TYPE_ENDOPEPTIDASE_INHIBITOR_ACTIVITY	33	0.414584	1.30944	0.148221	0.60174	1	1963	tags=30%, list=18%, signal=37%
GO_REGULATION_OF_DEFENSE_RESPONSE_TO_VIRUS	110	0.295083	1.30944	0.0864979	0.600549	1	3465	tags=40%, list=32%, signal=58%
GO_LIPASE_ACTIVITY	73	0.347653	1.30863	0.135496	0.601657	1	2560	tags=36%, list=24%, signal=46%
GO_MONOCARBOXYLIC_ACID_BIOSYNTHETIC_PROCESS	86	0.322706	1.30854	0.0893204	0.600623	1	1549	tags=26%, list=14%, signal=30%
GO_ANTIGEN_PROCESSING_AND_PRESENTATION_OF_PEPTIDE_ANTIGEN	89	0.377638	1.30823	0.212062	0.600214	1	2954	tags=45%, list=27%, signal=61%
GO_RESPONSE_TO_DIETARY_EXCESS	15	0.461607	1.30808	0.136719	0.599469	1	2018	tags=33%, list=19%, signal=41%
GO_REGULATION_OF_ADENYLATE_CYCLASE_ACTIVITY	39	0.359144	1.30803	0.112	0.598387	1	1160	tags=23%, list=11%, signal=26%
GO_ADENYLATE_CYCLASE_INHIBITING_G_PROTEIN_COUPLED_RECEPTOR_SIGNALING_PATHWAY	37	0.388021	1.308	0.117764	0.597266	1	2034	tags=38%, list=19%, signal=46%
GO_REGULATION_OF_PHOSPHATIDYLINOSITOL_3_KINASE_ACTIVITY	23	0.463926	1.30773	0.163708	0.596779	1	2607	tags=57%, list=24%, signal=74%
GO_POSITIVE_REGULATION_OF_MAP_KINASE_ACTIVITY	121	0.314742	1.30693	0.128906	0.597815	1	1654	tags=25%, list=15%, signal=29%
GO_SPERM_EGG_RECOGNITION	29	0.397034	1.30659	0.147773	0.597609	1	2292	tags=45%, list=21%, signal=57%
GO_REGULATION_OF_CYTOKINESIS	39	0.370498	1.30652	0.138	0.59661	1	1672	tags=28%, list=15%, signal=33%
GO_NEUROEPITHELIAL_CELL_DIFFERENTIATION	31	0.375058	1.30548	0.134921	0.598536	1	2571	tags=32%, list=24%, signal=42%
GO_SPROUTING_ANGIOGENESIS	27	0.408165	1.30526	0.152256	0.597952	1	2387	tags=41%, list=22%, signal=52%
GO_RESPONSE_TO_LIGHT_STIMULUS	158	0.265923	1.30495	0.0724346	0.597712	1	3277	tags=38%, list=30%, signal=54%
GO_REGULATION_OF_DNA_TEMPLATED_TRANSCRIPTION_IN_RESPONSE_TO_STRESS	32	0.366039	1.30382	0.147917	0.599674	1	3541	tags=47%, list=33%, signal=69%
GO_REGULATION_OF_LIPID_TRANSPORT	54	0.340963	1.3034	0.10142	0.599695	1	2073	tags=33%, list=19%, signal=41%
GO_REGULATION_OF_B_CELL_ACTIVATION	58	0.40655	1.30221	0.210019	0.602029	1	2377	tags=41%, list=22%, signal=53%
GO_REGULATION_OF_ERBB_SIGNALING_PATHWAY	40	0.355656	1.30208	0.138614	0.601222	1	2780	tags=35%, list=26%, signal=47%
GO_POSITIVE_REGULATION_OF_GROWTH	130	0.286702	1.30188	0.0896414	0.600602	1	2858	tags=35%, list=26%, signal=47%
GO_REGULATION_OF_PROTEIN_POLYMERIZATION	92	0.295156	1.30017	0.112648	0.60418	1	2248	tags=28%, list=21%, signal=35%
GO_RESPONSE_TO_RADIATION	234	0.257148	1.29913	0.0554455	0.605984	1	3277	tags=36%, list=30%, signal=51%
GO_POSITIVE_REGULATION_OF_CYTOKINE_PRODUCTION_INVOLVED_IN_IMMUNE_RESPONSE	18	0.439208	1.29863	0.166667	0.606206	1	2284	tags=44%, list=21%, signal=56%
GO_ANDROGEN_METABOLIC_PROCESS	17	0.469407	1.2982	0.136449	0.606264	1	1802	tags=29%, list=17%, signal=35%
GO_B_CELL_RECEPTOR_SIGNALING_PATHWAY	24	0.538203	1.29728	0.247582	0.607722	1	2713	tags=63%, list=25%, signal=83%
GO_POSITIVE_REGULATION_OF_ERBB_SIGNALING_PATHWAY	20	0.422682	1.29707	0.154158	0.60712	1	1758	tags=30%, list=16%, signal=36%
GO_NEGATIVE_REGULATION_OF_ENDOCYTOSIS	15	0.468864	1.29649	0.194444	0.607541	1	2834	tags=53%, list=26%, signal=72%
GO_POSITIVE_REGULATION_OF_LIPID_METABOLIC_PROCESS	67	0.333301	1.2964	0.126706	0.606621	1	2387	tags=40%, list=22%, signal=51%
GO_ANCHORED_COMPONENT_OF_MEMBRANE	86	0.342884	1.29563	0.127016	0.607497	1	2614	tags=35%, list=24%, signal=46%
GO_SECRETORY_GRANULE_ORGANIZATION	16	0.431628	1.29473	0.149225	0.608956	1	2003	tags=38%, list=18%, signal=46%
GO_VESICLE_MEMBRANE	280	0.277127	1.29232	0.101031	0.614489	1	2924	tags=33%, list=27%, signal=43%
GO_POSITIVE_REGULATION_OF_PROTEOLYSIS	219	0.267343	1.29108	0.0921569	0.616811	1	2999	tags=36%, list=28%, signal=49%
GO_REGULATION_OF_MULTI_ORGANISM_PROCESS	250	0.27364	1.29105	0.097561	0.61572	1	2499	tags=29%, list=23%, signal=37%
GO_POSITIVE_REGULATION_OF_LIPID_TRANSPORT	32	0.380683	1.29085	0.139165	0.615116	1	2955	tags=47%, list=27%, signal=64%
GO_DNA_PACKAGING_COMPLEX	49	0.444143	1.29001	0.220238	0.616342	1	2753	tags=45%, list=25%, signal=60%
GO_RESPONSE_TO_KETONE	119	0.312112	1.28981	0.105469	0.615743	1	3463	tags=43%, list=32%, signal=62%
GO_ENDOTHELIAL_CELL_DIFFERENTIATION	37	0.376181	1.28922	0.160321	0.616129	1	2472	tags=41%, list=23%, signal=52%
GO_REGULATION_OF_VESICLE_MEDIATED_TRANSPORT	266	0.281321	1.28809	0.118367	0.618124	1	2891	tags=35%, list=27%, signal=47%
GO_CLATHRIN_COATED_VESICLE	89	0.333404	1.28787	0.142292	0.617695	1	2568	tags=36%, list=24%, signal=47%
GO_REGULATION_OF_CELLULAR_COMPONENT_SIZE	174	0.278323	1.28766	0.112403	0.617101	1	2381	tags=29%, list=22%, signal=37%
GO_PROTEIN_TYROSINE_KINASE_ACTIVITY	96	0.319863	1.2875	0.127376	0.616433	1	2203	tags=32%, list=20%, signal=40%
GO_EMBRYONIC_PLACENTA_DEVELOPMENT	47	0.371872	1.28733	0.160853	0.615799	1	2538	tags=38%, list=23%, signal=50%
GO_TRANSCRIPTIONAL_REPRESSOR_ACTIVITY_RNA_POLYMERASE_II_CORE_PROMOTER_PROXIMAL_REGION_SEQUENCE_SPECIFIC_BINDING	67	0.325014	1.28621	0.137255	0.617747	1	2963	tags=39%, list=27%, signal=53%
GO_REGULATION_OF_MYOBLAST_DIFFERENTIATION	29	0.442037	1.28512	0.152672	0.619543	1	2388	tags=41%, list=22%, signal=53%
GO_POSITIVE_REGULATION_OF_TRANSFERASE_ACTIVITY	356	0.256544	1.28393	0.0788462	0.621668	1	2819	tags=32%, list=26%, signal=42%
GO_PROTEIN_TETRAMERIZATION	83	0.306399	1.28392	0.131313	0.620571	1	2753	tags=35%, list=25%, signal=46%
GO_POSITIVE_REGULATION_OF_CELL_CYCLE	193	0.277373	1.28386	0.117308	0.619604	1	2482	tags=29%, list=23%, signal=37%
GO_VITAMIN_METABOLIC_PROCESS	65	0.327734	1.28185	0.131048	0.624059	1	3423	tags=45%, list=32%, signal=65%
GO_NEGATIVE_REGULATION_OF_IMMUNE_EFFECTOR_PROCESS	60	0.349975	1.2811	0.170543	0.625026	1	1243	tags=23%, list=11%, signal=26%
GO_NEGATIVE_REGULATION_OF_CELL_ADHESION	128	0.299136	1.2811	0.116105	0.623888	1	2172	tags=30%, list=20%, signal=37%
GO_REGULATION_OF_REGULATED_SECRETORY_PATHWAY	68	0.320585	1.28054	0.137725	0.624393	1	2733	tags=38%, list=25%, signal=51%
GO_REGULATION_OF_TISSUE_REMODELING	34	0.409691	1.28053	0.185484	0.62328	1	2216	tags=41%, list=20%, signal=52%
GO_BASAL_PLASMA_MEMBRANE	19	0.43353	1.28035	0.170093	0.62262	1	2834	tags=47%, list=26%, signal=64%
GO_EPIDERMAL_GROWTH_FACTOR_RECEPTOR_BINDING	19	0.419568	1.28029	0.194	0.621683	1	1627	tags=26%, list=15%, signal=31%
GO_CHROMATIN_SILENCING_AT_RDNA	24	0.43947	1.28012	0.197556	0.620962	1	2753	tags=46%, list=25%, signal=61%
GO_REGULATION_OF_CYSTEINE_TYPE_ENDOPEPTIDASE_ACTIVITY	135	0.285022	1.27994	0.0962672	0.620338	1	2569	tags=31%, list=24%, signal=40%
GO_CLATHRIN_COATED_VESICLE_MEMBRANE	42	0.380374	1.27943	0.162055	0.620702	1	2374	tags=40%, list=22%, signal=52%
GO_MITOTIC_SISTER_CHROMATID_SEGREGATION	59	0.401341	1.27859	0.24053	0.621801	1	3503	tags=49%, list=32%, signal=72%
GO_REGULATION_OF_WOUND_HEALING	65	0.369644	1.27833	0.17	0.621442	1	2083	tags=32%, list=19%, signal=40%
GO_ENDOCYTIC_VESICLE_MEMBRANE	81	0.342085	1.27822	0.175889	0.620602	1	2215	tags=33%, list=20%, signal=42%
GO_NEGATIVE_REGULATION_OF_TYPE_I_INTERFERON_PRODUCTION	28	0.410876	1.27753	0.215447	0.621546	1	3541	tags=46%, list=33%, signal=69%
GO_POSITIVE_REGULATION_OF_AXONOGENESIS	39	0.350378	1.27647	0.162791	0.623477	1	1162	tags=23%, list=11%, signal=26%
GO_NUCLEOSOME_BINDING	24	0.397234	1.27625	0.182731	0.623005	1	2611	tags=33%, list=24%, signal=44%
GO_POSITIVE_REGULATION_OF_GLIOGENESIS	22	0.416279	1.27615	0.183071	0.622162	1	2799	tags=50%, list=26%, signal=67%
GO_REGULATION_OF_PEPTIDE_TRANSPORT	128	0.297685	1.27462	0.101167	0.625102	1	2874	tags=40%, list=27%, signal=54%
GO_REGULATION_OF_PHAGOCYTOSIS	39	0.395025	1.27459	0.185185	0.624059	1	2886	tags=54%, list=27%, signal=73%
GO_MALE_GENITALIA_DEVELOPMENT	18	0.439748	1.27377	0.141777	0.625146	1	3229	tags=50%, list=30%, signal=71%
GO_AMMONIUM_ION_METABOLIC_PROCESS	101	0.300498	1.27338	0.147217	0.625179	1	1468	tags=22%, list=14%, signal=25%
GO_ANDROGEN_RECEPTOR_SIGNALING_PATHWAY	28	0.393794	1.27335	0.196078	0.624146	1	3655	tags=50%, list=34%, signal=75%
GO_REGULATION_OF_CALCIUM_ION_IMPORT	59	0.341412	1.27331	0.147793	0.623181	1	1830	tags=27%, list=17%, signal=32%
GO_COLUMNAR_CUBOIDAL_EPITHELIAL_CELL_DEVELOPMENT	26	0.379868	1.272	0.157282	0.625707	1	1603	tags=23%, list=15%, signal=27%
GO_POSITIVE_REGULATION_OF_JUN_KINASE_ACTIVITY	38	0.36748	1.27163	0.179842	0.625588	1	1654	tags=32%, list=15%, signal=37%
GO_POSITIVE_REGULATION_OF_MYOTUBE_DIFFERENTIATION	20	0.504536	1.27063	0.187621	0.627311	1	1739	tags=50%, list=16%, signal=59%
GO_NEGATIVE_REGULATION_OF_LEUKOCYTE_MIGRATION	17	0.443089	1.26988	0.208661	0.628303	1	3734	tags=59%, list=34%, signal=90%
GO_DEFENSE_RESPONSE_TO_GRAM_POSITIVE_BACTERIUM	35	0.376735	1.26837	0.153082	0.631335	1	2840	tags=54%, list=26%, signal=73%
GO_PLASMA_MEMBRANE_PROTEIN_COMPLEX	277	0.28722	1.26836	0.147228	0.630266	1	2332	tags=30%, list=22%, signal=37%
GO_RESPONSE_TO_FUNGUS	31	0.435282	1.26807	0.158607	0.629992	1	1756	tags=42%, list=16%, signal=50%
GO_CLATHRIN_COATED_ENDOCYTIC_VESICLE	30	0.443529	1.26807	0.194118	0.6289	1	2374	tags=50%, list=22%, signal=64%
GO_CALCIUM_DEPENDENT_PROTEIN_BINDING	32	0.372256	1.26725	0.127202	0.630011	1	2228	tags=34%, list=21%, signal=43%
GO_POSITIVE_REGULATION_OF_STRIATED_MUSCLE_CELL_DIFFERENTIATION	36	0.394134	1.26655	0.150097	0.630745	1	1805	tags=36%, list=17%, signal=43%
GO_CYTOSOLIC_CALCIUM_ION_TRANSPORT	32	0.370429	1.26624	0.180769	0.630487	1	607	tags=19%, list=6%, signal=20%
GO_POSITIVE_REGULATION_OF_CALCIUM_MEDIATED_SIGNALING	25	0.42783	1.26616	0.203704	0.629656	1	2300	tags=40%, list=21%, signal=51%
GO_REGULATION_OF_RELEASE_OF_SEQUESTERED_CALCIUM_ION_INTO_CYTOSOL	43	0.355317	1.26596	0.189084	0.629202	1	1030	tags=19%, list=10%, signal=20%
GO_RESPONSE_TO_NICOTINE	30	0.372027	1.26558	0.157495	0.629267	1	2253	tags=37%, list=21%, signal=46%
GO_REGULATION_OF_HORMONE_SECRETION	134	0.28571	1.26554	0.0988593	0.628306	1	2851	tags=38%, list=26%, signal=51%
GO_POSITIVE_REGULATION_OF_KINASE_ACTIVITY	279	0.264583	1.26543	0.117202	0.627513	1	2661	tags=32%, list=25%, signal=41%
GO_LUMENAL_SIDE_OF_MEMBRANE	17	0.550693	1.26519	0.264591	0.627098	1	1269	tags=35%, list=12%, signal=40%
GO_CELL_MATURATION	73	0.307418	1.26499	0.10338	0.626623	1	2349	tags=36%, list=22%, signal=45%
GO_CELLULAR_RESPONSE_TO_CORTICOSTEROID_STIMULUS	35	0.355851	1.26494	0.138144	0.6257	1	3147	tags=43%, list=29%, signal=60%
GO_CHEMICAL_HOMEOSTASIS	498	0.262492	1.26476	0.0737052	0.625143	1	2512	tags=30%, list=23%, signal=37%
GO_REGULATION_OF_CELL_SHAPE	76	0.319159	1.26359	0.164773	0.627237	1	2432	tags=37%, list=22%, signal=47%
GO_REGULATION_OF_GLIAL_CELL_DIFFERENTIATION	30	0.369907	1.2632	0.155769	0.627194	1	2583	tags=37%, list=24%, signal=48%
GO_REGULATION_OF_EXTRINSIC_APOPTOTIC_SIGNALING_PATHWAY_VIA_DEATH_DOMAIN_RECEPTORS	28	0.385033	1.26267	0.187891	0.627503	1	1395	tags=29%, list=13%, signal=33%
GO_POSITIVE_REGULATION_OF_CELL_DIFFERENTIATION	447	0.269284	1.26172	0.109641	0.629066	1	2578	tags=32%, list=24%, signal=41%
GO_DEFENSE_RESPONSE_TO_VIRUS	85	0.348144	1.26164	0.211694	0.628263	1	3253	tags=45%, list=30%, signal=63%
GO_NEGATIVE_REGULATION_OF_MUSCLE_CELL_DIFFERENTIATION	31	0.396923	1.26136	0.162	0.627945	1	2388	tags=35%, list=22%, signal=45%
GO_NEGATIVE_REGULATION_OF_CATABOLIC_PROCESS	116	0.27039	1.26125	0.100402	0.627187	1	2440	tags=29%, list=23%, signal=37%
GO_REGULATION_OF_SMOOTH_MUSCLE_CELL_PROLIFERATION	65	0.315355	1.25852	0.143667	0.633715	1	2505	tags=35%, list=23%, signal=46%
GO_PROTEIN_LIPID_COMPLEX_SUBUNIT_ORGANIZATION	22	0.398131	1.25743	0.178571	0.635624	1	1360	tags=32%, list=13%, signal=36%
GO_NEGATIVE_REGULATION_OF_LIPID_BIOSYNTHETIC_PROCESS	24	0.382368	1.25686	0.198397	0.636139	1	2321	tags=38%, list=21%, signal=48%
GO_NEGATIVE_REGULATION_OF_CELLULAR_CATABOLIC_PROCESS	90	0.276817	1.25674	0.096	0.63538	1	2440	tags=30%, list=23%, signal=38%
GO_NEGATIVE_REGULATION_OF_PEPTIDYL_TYROSINE_PHOSPHORYLATION	25	0.373941	1.25613	0.167006	0.636096	1	2463	tags=40%, list=23%, signal=52%
GO_RESPONSE_TO_NERVE_GROWTH_FACTOR	24	0.397193	1.25604	0.195378	0.635326	1	2732	tags=42%, list=25%, signal=56%
GO_POSITIVE_REGULATION_OF_PROTEIN_SERINE_THREONINE_KINASE_ACTIVITY	174	0.280667	1.2555	0.128405	0.635702	1	1125	tags=18%, list=10%, signal=20%
GO_CARBOHYDRATE_BINDING	161	0.314465	1.25456	0.160377	0.63726	1	3347	tags=45%, list=31%, signal=64%
GO_ADENYLATE_CYCLASE_MODULATING_G_PROTEIN_COUPLED_RECEPTOR_SIGNALING_PATHWAY	79	0.333472	1.25441	0.137931	0.636671	1	2034	tags=32%, list=19%, signal=39%
GO_APOPTOTIC_SIGNALING_PATHWAY	181	0.263574	1.25364	0.127789	0.637709	1	2607	tags=33%, list=24%, signal=42%
GO_FATTY_ACID_DERIVATIVE_BIOSYNTHETIC_PROCESS	19	0.419527	1.25362	0.204633	0.636721	1	2263	tags=37%, list=21%, signal=46%
GO_CARDIAC_MUSCLE_TISSUE_MORPHOGENESIS	36	0.405748	1.25328	0.196498	0.636612	1	2651	tags=44%, list=24%, signal=59%
GO_POSITIVE_REGULATION_OF_SMOOTH_MUSCLE_CELL_MIGRATION	20	0.420142	1.25317	0.204545	0.635832	1	2680	tags=40%, list=25%, signal=53%
GO_PROSTATE_GLAND_DEVELOPMENT	22	0.404182	1.25307	0.197581	0.635038	1	1385	tags=27%, list=13%, signal=31%
GO_PEPTIDE_ANTIGEN_BINDING	19	0.516633	1.25284	0.253846	0.634594	1	3261	tags=58%, list=30%, signal=83%
GO_POSITIVE_REGULATION_OF_PROTEIN_SECRETION	113	0.317834	1.25238	0.1917	0.634814	1	2328	tags=33%, list=21%, signal=41%
GO_MICROTUBULE_MOTOR_ACTIVITY	42	0.352637	1.25235	0.19774	0.633868	1	2990	tags=43%, list=28%, signal=59%
GO_RESPONSE_TO_TESTOSTERONE	24	0.384241	1.25159	0.167347	0.634991	1	4331	tags=63%, list=40%, signal=104%
GO_NEGATIVE_REGULATION_OF_CELLULAR_PROTEIN_CATABOLIC_PROCESS	37	0.34458	1.25105	0.186508	0.635582	1	3771	tags=49%, list=35%, signal=74%
GO_POSITIVE_REGULATION_OF_NF_KAPPAB_TRANSCRIPTION_FACTOR_ACTIVITY	77	0.324989	1.25083	0.176471	0.63512	1	2328	tags=31%, list=21%, signal=39%
GO_REGULATION_OF_LYASE_ACTIVITY	47	0.334853	1.25037	0.153061	0.635301	1	1160	tags=21%, list=11%, signal=24%
GO_FC_GAMMA_RECEPTOR_SIGNALING_PATHWAY	37	0.385087	1.24984	0.225379	0.635734	1	3156	tags=49%, list=29%, signal=68%
GO_NEGATIVE_REGULATION_OF_LYMPHOCYTE_DIFFERENTIATION	22	0.430588	1.24925	0.213873	0.636262	1	1643	tags=36%, list=15%, signal=43%
GO_REGULATION_OF_B_CELL_PROLIFERATION	31	0.422163	1.2488	0.255597	0.636451	1	1542	tags=35%, list=14%, signal=41%
GO_CELLULAR_RESPONSE_TO_DEXAMETHASONE_STIMULUS	15	0.432191	1.24874	0.182365	0.635549	1	1482	tags=27%, list=14%, signal=31%
GO_MULTI_ORGANISM_MEMBRANE_ORGANIZATION	16	0.412693	1.24863	0.217573	0.63483	1	2463	tags=38%, list=23%, signal=48%
GO_TRANSCRIPTIONAL_ACTIVATOR_ACTIVITY_RNA_POLYMERASE_II_DISTAL_ENHANCER_SEQUENCE_SPECIFIC_BINDING	19	0.413313	1.24822	0.205374	0.634876	1	4139	tags=58%, list=38%, signal=94%
GO_REGULATION_OF_GENE_EXPRESSION_EPIGENETIC	129	0.310989	1.24817	0.210526	0.634045	1	3440	tags=42%, list=32%, signal=61%
GO_IMPORT_INTO_CELL	21	0.420995	1.2478	0.183794	0.633947	1	2779	tags=57%, list=26%, signal=77%
GO_G_PROTEIN_COUPLED_RECEPTOR_BINDING	148	0.302857	1.24757	0.155642	0.633623	1	2074	tags=26%, list=19%, signal=31%
GO_OXIDOREDUCTASE_ACTIVITY_ACTING_ON_PAIRED_DONORS_WITH_INCORPORATION_OR_REDUCTION_OF_MOLECULAR_OXYGEN	77	0.349902	1.24718	0.142857	0.633776	1	2431	tags=35%, list=22%, signal=45%
GO_VISUAL_BEHAVIOR	30	0.343609	1.24705	0.161088	0.633125	1	923	tags=27%, list=9%, signal=29%
GO_REGULATION_OF_VIRAL_RELEASE_FROM_HOST_CELL	15	0.437358	1.24678	0.189474	0.632934	1	552	tags=13%, list=5%, signal=14%
GO_ACUTE_INFLAMMATORY_RESPONSE	37	0.400611	1.24669	0.209486	0.63214	1	2328	tags=46%, list=21%, signal=58%
GO_REGULATION_OF_INTERLEUKIN_8_PRODUCTION	37	0.377916	1.24587	0.176353	0.633428	1	2499	tags=41%, list=23%, signal=53%
GO_ARACHIDONIC_ACID_METABOLIC_PROCESS	27	0.428455	1.24491	0.202505	0.63494	1	2302	tags=41%, list=21%, signal=52%
GO_COATED_VESICLE	131	0.301706	1.24471	0.163708	0.634479	1	3006	tags=38%, list=28%, signal=52%
GO_POSITIVE_REGULATION_OF_DNA_REPLICATION	50	0.335205	1.2447	0.149901	0.633505	1	1805	tags=28%, list=17%, signal=33%
GO_CHROMATIN_ASSEMBLY_OR_DISASSEMBLY	87	0.345162	1.2438	0.212724	0.634864	1	2753	tags=38%, list=25%, signal=50%
GO_PHOSPHOLIPASE_ACTIVITY	61	0.330728	1.24302	0.178108	0.63597	1	1716	tags=26%, list=16%, signal=31%
GO_WATER_HOMEOSTASIS	39	0.416282	1.24211	0.250996	0.637391	1	1006	tags=31%, list=9%, signal=34%
GO_REGULATION_OF_ANATOMICAL_STRUCTURE_SIZE	261	0.267105	1.24209	0.113503	0.636443	1	2516	tags=31%, list=23%, signal=39%
GO_NATURAL_KILLER_CELL_ACTIVATION	24	0.457074	1.24189	0.230337	0.63594	1	2874	tags=63%, list=27%, signal=85%
GO_SOMATIC_CELL_DNA_RECOMBINATION	18	0.418039	1.24134	0.210832	0.636409	1	1462	tags=28%, list=14%, signal=32%
GO_REGULATION_OF_GTPASE_ACTIVITY	392	0.26218	1.23881	0.135922	0.642193	1	2680	tags=30%, list=25%, signal=39%
GO_LIPOPOLYSACCHARIDE_MEDIATED_SIGNALING_PATHWAY	19	0.496262	1.23851	0.262846	0.642008	1	3362	tags=53%, list=31%, signal=76%
GO_REGULATION_OF_DEFENSE_RESPONSE_TO_VIRUS_BY_VIRUS	15	0.4831	1.23761	0.26626	0.643347	1	2300	tags=40%, list=21%, signal=51%
GO_POSITIVE_REGULATION_OF_SMOOTH_MUSCLE_CELL_PROLIFERATION	38	0.343533	1.23741	0.173333	0.642904	1	2505	tags=37%, list=23%, signal=48%
GO_NEGATIVE_REGULATION_OF_MYELOID_LEUKOCYTE_DIFFERENTIATION	33	0.373323	1.23709	0.210428	0.642779	1	2607	tags=39%, list=24%, signal=52%
GO_EPITHELIAL_CELL_PROLIFERATION	52	0.343491	1.23698	0.17495	0.642105	1	2877	tags=40%, list=27%, signal=55%
GO_FOLIC_ACID_CONTAINING_COMPOUND_METABOLIC_PROCESS	16	0.440749	1.23674	0.203156	0.641818	1	3703	tags=50%, list=34%, signal=76%
GO_FEMALE_GAMETE_GENERATION	50	0.322639	1.23632	0.15587	0.641968	1	2807	tags=40%, list=26%, signal=54%
GO_MULTICELLULAR_ORGANISMAL_HOMEOSTASIS	161	0.293874	1.23604	0.172888	0.64173	1	2632	tags=33%, list=24%, signal=43%
GO_CALCIUM_ION_TRANSMEMBRANE_TRANSPORT	86	0.304611	1.23529	0.154639	0.642876	1	1582	tags=23%, list=15%, signal=27%
GO_POSITIVE_REGULATION_OF_MYELOID_LEUKOCYTE_DIFFERENTIATION	23	0.400019	1.2352	0.209945	0.642091	1	1256	tags=35%, list=12%, signal=39%
GO_B_CELL_DIFFERENTIATION	47	0.36845	1.23289	0.232877	0.647388	1	2780	tags=43%, list=26%, signal=57%
GO_RNA_POLYMERASE_II_CORE_PROMOTER_SEQUENCE_SPECIFIC_DNA_BINDING	35	0.348421	1.23253	0.189922	0.647363	1	3106	tags=46%, list=29%, signal=64%
GO_POSITIVE_REGULATION_OF_HOMEOSTATIC_PROCESS	125	0.281112	1.23187	0.153119	0.648289	1	2349	tags=29%, list=22%, signal=36%
GO_POSITIVE_REGULATION_OF_PROTEIN_TYROSINE_KINASE_ACTIVITY	23	0.382154	1.2313	0.2	0.648892	1	1805	tags=30%, list=17%, signal=36%
GO_RESPONSE_TO_OXYGEN_LEVELS	182	0.26913	1.23097	0.121649	0.648777	1	2834	tags=35%, list=26%, signal=47%
GO_SODIUM_ION_TRANSMEMBRANE_TRANSPORT	39	0.34305	1.23096	0.166667	0.647803	1	960	tags=23%, list=9%, signal=25%
GO_REGULATION_OF_PROTEIN_MODIFICATION_BY_SMALL_PROTEIN_CONJUGATION_OR_REMOVAL	163	0.272881	1.23039	0.15261	0.648327	1	3069	tags=33%, list=28%, signal=46%
GO_REGULATION_OF_HUMORAL_IMMUNE_RESPONSE	29	0.391982	1.23038	0.210317	0.647364	1	2354	tags=45%, list=22%, signal=57%
GO_POSITIVE_REGULATION_OF_EMBRYONIC_DEVELOPMENT	16	0.434628	1.23019	0.231076	0.646886	1	1165	tags=25%, list=11%, signal=28%
GO_POSITIVE_REGULATION_OF_CELL_PROJECTION_ORGANIZATION	158	0.270195	1.23011	0.161479	0.646148	1	2858	tags=34%, list=26%, signal=45%
GO_CELLULAR_RESPONSE_TO_LIGHT_STIMULUS	47	0.303973	1.22976	0.177778	0.646117	1	3176	tags=45%, list=29%, signal=63%
GO_REGULATION_OF_KINASE_ACTIVITY	466	0.240504	1.22966	0.110266	0.645409	1	2506	tags=28%, list=23%, signal=35%
GO_REGULATION_OF_LIPID_KINASE_ACTIVITY	26	0.415115	1.22955	0.245136	0.644696	1	2607	tags=54%, list=24%, signal=71%
GO_CELLULAR_RESPONSE_TO_OXYGEN_LEVELS	78	0.287734	1.22924	0.141975	0.644627	1	2834	tags=37%, list=26%, signal=50%
GO_POSITIVE_REGULATION_OF_RESPONSE_TO_CYTOKINE_STIMULUS	15	0.429469	1.2289	0.223849	0.644581	1	1162	tags=27%, list=11%, signal=30%
GO_REGULATION_OF_MAP_KINASE_ACTIVITY	198	0.272876	1.2289	0.170923	0.643623	1	1654	tags=22%, list=15%, signal=25%
GO_REGULATION_OF_CELL_GROWTH	211	0.263239	1.2282	0.143434	0.644495	1	2463	tags=29%, list=23%, signal=37%
GO_DETECTION_OF_ABIOTIC_STIMULUS	62	0.320512	1.22818	0.172481	0.643576	1	2973	tags=42%, list=27%, signal=57%
GO_PATTERN_RECOGNITION_RECEPTOR_SIGNALING_PATHWAY	58	0.35666	1.22793	0.239845	0.643285	1	2191	tags=36%, list=20%, signal=45%
GO_REGULATION_OF_PHOSPHATIDYLINOSITOL_3_KINASE_SIGNALING	73	0.314674	1.22709	0.165067	0.644567	1	2852	tags=37%, list=26%, signal=50%
GO_DNA_PACKAGING	95	0.341136	1.22706	0.225049	0.643697	1	2892	tags=40%, list=27%, signal=54%
GO_NEGATIVE_REGULATION_OF_B_CELL_ACTIVATION	18	0.476591	1.22695	0.234834	0.643055	1	677	tags=33%, list=6%, signal=35%
GO_NEGATIVE_REGULATION_OF_DNA_BINDING	28	0.365565	1.22688	0.184369	0.642269	1	2571	tags=32%, list=24%, signal=42%
GO_NEGATIVE_REGULATION_OF_AXON_EXTENSION	19	0.413161	1.22644	0.218	0.642576	1	3348	tags=53%, list=31%, signal=76%
GO_RESPONSE_TO_INTERLEUKIN_1	68	0.342528	1.22623	0.219316	0.642142	1	3291	tags=47%, list=30%, signal=67%
GO_PROTEIN_HOMOOLIGOMERIZATION	145	0.26683	1.22618	0.138277	0.641305	1	2459	tags=28%, list=23%, signal=36%
GO_RESPONSE_TO_ZINC_ION	31	0.350784	1.22568	0.196911	0.641714	1	2838	tags=52%, list=26%, signal=70%
GO_ACTIVATION_OF_INNATE_IMMUNE_RESPONSE	119	0.335982	1.22496	0.22664	0.642762	1	3621	tags=50%, list=33%, signal=74%
GO_REGULATION_OF_MYELOID_LEUKOCYTE_DIFFERENTIATION	62	0.342704	1.22373	0.226744	0.645007	1	2607	tags=39%, list=24%, signal=51%
GO_BLASTOCYST_FORMATION	16	0.419307	1.22232	0.223529	0.648009	1	2697	tags=50%, list=25%, signal=66%
GO_REGULATION_OF_CYCLIC_NUCLEOTIDE_METABOLIC_PROCESS	85	0.308778	1.22219	0.164751	0.647424	1	2034	tags=29%, list=19%, signal=36%
GO_REGULATION_OF_EXTENT_OF_CELL_GROWTH	54	0.325992	1.22122	0.198413	0.649084	1	1376	tags=22%, list=13%, signal=25%
GO_PHAGOCYTOSIS	86	0.339272	1.2209	0.240848	0.649013	1	3156	tags=42%, list=29%, signal=59%
GO_PHOSPHATIDYLINOSITOL_BINDING	112	0.280965	1.22062	0.166337	0.648765	1	1735	tags=22%, list=16%, signal=26%
GO_POSITIVE_REGULATION_OF_PROTEIN_IMPORT	70	0.307186	1.22022	0.184261	0.648969	1	2607	tags=30%, list=24%, signal=39%
GO_REGULATION_OF_NUCLEOTIDE_METABOLIC_PROCESS	116	0.284763	1.22018	0.160232	0.648131	1	2633	tags=33%, list=24%, signal=43%
GO_PHOTOPERIODISM	15	0.423485	1.21992	0.203455	0.647854	1	3219	tags=47%, list=30%, signal=66%
GO_TISSUE_REGENERATION	36	0.354603	1.21922	0.209213	0.648831	1	2275	tags=33%, list=21%, signal=42%
GO_PML_BODY	41	0.31846	1.21893	0.195695	0.648687	1	2367	tags=34%, list=22%, signal=44%
GO_CYTOSKELETON_ORGANIZATION	482	0.245991	1.21744	0.153551	0.651734	1	3156	tags=35%, list=29%, signal=47%
GO_REGULATION_OF_GLYCOPROTEIN_METABOLIC_PROCESS	23	0.363111	1.21652	0.178862	0.653264	1	1819	tags=26%, list=17%, signal=31%
GO_HOMEOSTASIS_OF_NUMBER_OF_CELLS	101	0.289413	1.21591	0.189824	0.653947	1	2354	tags=32%, list=22%, signal=40%
GO_PROTEIN_HETERODIMERIZATION_ACTIVITY	263	0.251888	1.21466	0.132265	0.656343	1	2775	tags=33%, list=26%, signal=43%
GO_ACTIN_FILAMENT	42	0.3435	1.21361	0.214724	0.658242	1	2870	tags=38%, list=27%, signal=52%
GO_NEGATIVE_REGULATION_OF_RESPONSE_TO_DNA_DAMAGE_STIMULUS	34	0.324841	1.21166	0.201183	0.662516	1	2274	tags=32%, list=21%, signal=41%
GO_REGULATION_OF_ION_HOMEOSTASIS	117	0.288939	1.21112	0.178988	0.662967	1	2593	tags=32%, list=24%, signal=42%
GO_TRANSCRIPTION_FACTOR_ACTIVITY_RNA_POLYMERASE_II_CORE_PROMOTER_PROXIMAL_REGION_SEQUENCE_SPECIFIC_BINDING	202	0.27466	1.2111	0.187984	0.662071	1	2587	tags=31%, list=24%, signal=40%
GO_NEGATIVE_REGULATION_OF_HORMONE_SECRETION	39	0.335997	1.20878	0.172481	0.667392	1	2553	tags=33%, list=24%, signal=43%
GO_POSITIVE_REGULATION_OF_G1_S_TRANSITION_OF_MITOTIC_CELL_CYCLE	16	0.404069	1.20876	0.230924	0.666479	1	1589	tags=31%, list=15%, signal=37%
GO_CELLULAR_RESPONSE_TO_ABIOTIC_STIMULUS	141	0.261628	1.20865	0.138776	0.66582	1	3419	tags=40%, list=32%, signal=58%
GO_REGULATION_OF_MACROPHAGE_DERIVED_FOAM_CELL_DIFFERENTIATION	16	0.429793	1.2084	0.24031	0.665515	1	175	tags=19%, list=2%, signal=19%
GO_MONOOXYGENASE_ACTIVITY	53	0.378214	1.20699	0.21611	0.668349	1	2431	tags=38%, list=22%, signal=48%
GO_MITOTIC_SPINDLE	31	0.376625	1.20665	0.242171	0.66832	1	2387	tags=42%, list=22%, signal=54%
GO_PROTEIN_TRIMERIZATION	19	0.391436	1.20591	0.222437	0.669278	1	1482	tags=26%, list=14%, signal=30%
GO_RESPONSE_TO_CALCIUM_ION	68	0.302804	1.20534	0.195609	0.669976	1	2266	tags=29%, list=21%, signal=37%
GO_ANGIOGENESIS	160	0.30358	1.20491	0.214141	0.670236	1	2530	tags=33%, list=23%, signal=43%
GO_PROTEIN_O_LINKED_GLYCOSYLATION	58	0.316768	1.20408	0.182178	0.671638	1	3448	tags=47%, list=32%, signal=68%
GO_DETECTION_OF_LIGHT_STIMULUS	28	0.354666	1.20288	0.225434	0.674016	1	2952	tags=50%, list=27%, signal=69%
GO_CIRCADIAN_RHYTHM	79	0.294436	1.20283	0.18146	0.673201	1	1799	tags=24%, list=17%, signal=29%
GO_SENSORY_PERCEPTION_OF_CHEMICAL_STIMULUS	69	0.313003	1.20275	0.186992	0.672494	1	1038	tags=19%, list=10%, signal=21%
GO_DNA_METHYLATION_OR_DEMETHYLATION	36	0.356189	1.20236	0.24948	0.672657	1	1251	tags=25%, list=12%, signal=28%
GO_RESPONSE_TO_IONIZING_RADIATION	82	0.290818	1.20234	0.194175	0.671754	1	1304	tags=20%, list=12%, signal=22%
GO_ENDOCYTIC_VESICLE	141	0.293345	1.2021	0.224033	0.671436	1	2220	tags=30%, list=21%, signal=38%
GO_ACTIN_FILAMENT_ORGANIZATION	94	0.287471	1.2013	0.219608	0.672705	1	2763	tags=34%, list=26%, signal=45%
GO_RECEPTOR_METABOLIC_PROCESS	42	0.332871	1.20112	0.209709	0.672283	1	1925	tags=26%, list=18%, signal=32%
GO_WATER_SOLUBLE_VITAMIN_METABOLIC_PROCESS	45	0.328923	1.20075	0.196819	0.672266	1	3703	tags=49%, list=34%, signal=74%
GO_JNK_CASCADE	46	0.325322	1.20056	0.244444	0.671856	1	2366	tags=35%, list=22%, signal=44%
GO_STEROL_HOMEOSTASIS	33	0.356534	1.20031	0.219124	0.671611	1	1378	tags=27%, list=13%, signal=31%
GO_ANCHORED_COMPONENT_OF_PLASMA_MEMBRANE	24	0.389653	1.20007	0.233068	0.671362	1	565	tags=21%, list=5%, signal=22%
GO_MOTOR_ACTIVITY	70	0.291481	1.19982	0.194932	0.671091	1	2176	tags=31%, list=20%, signal=39%
GO_ACTIN_POLYMERIZATION_OR_DEPOLYMERIZATION	19	0.398001	1.19921	0.243762	0.671841	1	2219	tags=32%, list=20%, signal=40%
GO_REGULATION_OF_P38MAPK_CASCADE	18	0.414203	1.19847	0.252446	0.673044	1	1539	tags=39%, list=14%, signal=45%
GO_LENS_FIBER_CELL_DIFFERENTIATION	18	0.403387	1.19819	0.239085	0.672879	1	1557	tags=22%, list=14%, signal=26%
GO_EARLY_ENDOSOME	164	0.264247	1.19816	0.190763	0.672057	1	2472	tags=29%, list=23%, signal=37%
GO_RESPONSE_TO_EPIDERMAL_GROWTH_FACTOR	19	0.382057	1.19794	0.22179	0.671629	1	1315	tags=21%, list=12%, signal=24%
GO_APICAL_PLASMA_MEMBRANE	159	0.273682	1.19762	0.163065	0.671543	1	2284	tags=28%, list=21%, signal=35%
GO_ACTIN_FILAMENT_BINDING	65	0.310442	1.19707	0.205825	0.672125	1	3077	tags=40%, list=28%, signal=56%
GO_REGULATION_OF_TRIGLYCERIDE_METABOLIC_PROCESS	18	0.427355	1.1967	0.217899	0.672185	1	2231	tags=50%, list=21%, signal=63%
GO_NEUROBLAST_PROLIFERATION	20	0.399111	1.19626	0.214418	0.672459	1	3510	tags=55%, list=32%, signal=81%
GO_CELLULAR_COMPONENT_DISASSEMBLY_INVOLVED_IN_EXECUTION_PHASE_OF_APOPTOSIS	24	0.35563	1.19596	0.204409	0.672313	1	2439	tags=33%, list=23%, signal=43%
GO_POSITIVE_REGULATION_OF_MAPK_CASCADE	278	0.273477	1.19585	0.191321	0.671736	1	1663	tags=23%, list=15%, signal=27%
GO_HYDROLASE_ACTIVITY_ACTING_ON_CARBON_NITROGEN_BUT_NOT_PEPTIDE_BONDS_IN_CYCLIC_AMIDINES	17	0.399865	1.19582	0.233533	0.670893	1	2072	tags=35%, list=19%, signal=44%
GO_GLYCOSYL_COMPOUND_CATABOLIC_PROCESS	20	0.389963	1.19534	0.250482	0.671191	1	1294	tags=25%, list=12%, signal=28%
GO_REPRODUCTIVE_SYSTEM_DEVELOPMENT	237	0.265391	1.19434	0.16888	0.672999	1	2186	tags=27%, list=20%, signal=33%
GO_NEUROPEPTIDE_RECEPTOR_ACTIVITY	19	0.413448	1.1942	0.21118	0.672458	1	2973	tags=63%, list=27%, signal=87%
GO_RESPONSE_TO_TRANSITION_METAL_NANOPARTICLE	86	0.281605	1.19408	0.178431	0.671872	1	2838	tags=40%, list=26%, signal=53%
GO_HORMONE_BIOSYNTHETIC_PROCESS	29	0.451405	1.19399	0.233591	0.671206	1	1360	tags=31%, list=13%, signal=35%
GO_NEGATIVE_REGULATION_OF_CARBOHYDRATE_METABOLIC_PROCESS	28	0.336195	1.19371	0.225806	0.671055	1	3831	tags=57%, list=35%, signal=88%
GO_POSITIVE_REGULATION_OF_SECRETION	192	0.276817	1.19367	0.179074	0.67026	1	2679	tags=35%, list=25%, signal=46%
GO_POSITIVE_REGULATION_OF_OXIDOREDUCTASE_ACTIVITY	28	0.359081	1.19351	0.186147	0.669813	1	2328	tags=39%, list=21%, signal=50%
GO_DNA_REPLICATION_INDEPENDENT_NUCLEOSOME_ORGANIZATION	25	0.412512	1.19341	0.282692	0.669181	1	2753	tags=44%, list=25%, signal=59%
GO_GENE_SILENCING	113	0.30586	1.19294	0.236948	0.66956	1	3410	tags=43%, list=31%, signal=63%
GO_BASOLATERAL_PLASMA_MEMBRANE	110	0.293221	1.1922	0.212891	0.670579	1	2632	tags=35%, list=24%, signal=45%
GO_OLFACTORY_RECEPTOR_ACTIVITY	29	0.38121	1.19201	0.199597	0.670168	1	1651	tags=31%, list=15%, signal=37%
GO_CARDIOCYTE_DIFFERENTIATION	59	0.325735	1.19198	0.217039	0.669343	1	2170	tags=32%, list=20%, signal=40%
GO_CELL_CYCLE_G1_S_PHASE_TRANSITION	64	0.356167	1.19144	0.272059	0.669841	1	3532	tags=44%, list=33%, signal=65%
GO_RUFFLE	91	0.28127	1.18999	0.2	0.672847	1	2799	tags=37%, list=26%, signal=50%
GO_FAT_SOLUBLE_VITAMIN_METABOLIC_PROCESS	20	0.388955	1.18947	0.229862	0.67324	1	2083	tags=35%, list=19%, signal=43%
GO_REGULATION_OF_ALCOHOL_BIOSYNTHETIC_PROCESS	25	0.390791	1.18925	0.264078	0.672892	1	2593	tags=48%, list=24%, signal=63%
GO_RESPONSE_TO_CARBOHYDRATE	91	0.282603	1.18898	0.18146	0.672712	1	2553	tags=31%, list=24%, signal=40%
GO_CATION_CHANNEL_ACTIVITY	162	0.277908	1.18844	0.197605	0.673278	1	2252	tags=29%, list=21%, signal=36%
GO_TAXIS	257	0.288003	1.18809	0.223938	0.673325	1	2381	tags=31%, list=22%, signal=39%
GO_DETECTION_OF_VISIBLE_LIGHT	23	0.373109	1.18762	0.239845	0.673693	1	2952	tags=52%, list=27%, signal=72%
GO_CELL_CORTEX	128	0.263898	1.18754	0.162524	0.673019	1	2347	tags=28%, list=22%, signal=35%
GO_CELLULAR_RESPONSE_TO_KETONE	45	0.33049	1.18708	0.204322	0.673324	1	3745	tags=44%, list=35%, signal=68%
GO_REPLISOME	15	0.439246	1.18679	0.285433	0.67318	1	3638	tags=67%, list=34%, signal=100%
GO_IONOTROPIC_GLUTAMATE_RECEPTOR_COMPLEX	29	0.380889	1.18549	0.247951	0.67562	1	1418	tags=28%, list=13%, signal=32%
GO_NEGATIVE_REGULATION_OF_CALCIUM_ION_TRANSPORT	30	0.352445	1.18541	0.210721	0.674974	1	1378	tags=27%, list=13%, signal=30%
GO_DETECTION_OF_STIMULUS	167	0.26673	1.18537	0.139442	0.674191	1	2239	tags=27%, list=21%, signal=33%
GO_REGULATION_OF_CELL_MATRIX_ADHESION	57	0.297154	1.18528	0.204842	0.673539	1	2285	tags=35%, list=21%, signal=44%
GO_SECRETORY_GRANULE_MEMBRANE	39	0.332261	1.1852	0.226744	0.672877	1	2924	tags=38%, list=27%, signal=53%
GO_POSITIVE_REGULATION_OF_MYOBLAST_DIFFERENTIATION	16	0.5218	1.18472	0.26145	0.673291	1	2275	tags=50%, list=21%, signal=63%
GO_NEUTRAL_LIPID_METABOLIC_PROCESS	50	0.340303	1.18438	0.189189	0.67333	1	1507	tags=20%, list=14%, signal=23%
GO_NEGATIVE_REGULATION_OF_APOPTOTIC_SIGNALING_PATHWAY	112	0.271147	1.18394	0.191837	0.673577	1	2569	tags=29%, list=24%, signal=38%
GO_CARDIAC_EPITHELIAL_TO_MESENCHYMAL_TRANSITION	19	0.410936	1.18352	0.25	0.673867	1	1818	tags=37%, list=17%, signal=44%
GO_ERBB_SIGNALING_PATHWAY	42	0.328592	1.18348	0.235178	0.673092	1	2780	tags=31%, list=26%, signal=41%
GO_DYNEIN_COMPLEX	22	0.374143	1.18311	0.234043	0.673154	1	2724	tags=45%, list=25%, signal=61%
GO_LEUKOTRIENE_METABOLIC_PROCESS	15	0.447221	1.18287	0.258064	0.672891	1	2263	tags=33%, list=21%, signal=42%
GO_NEGATIVE_REGULATION_OF_ANION_TRANSPORT	19	0.387068	1.1828	0.218631	0.672196	1	2343	tags=47%, list=22%, signal=60%
GO_REGULATION_OF_CAMP_METABOLIC_PROCESS	74	0.301537	1.1827	0.18146	0.671589	1	2034	tags=28%, list=19%, signal=35%
GO_PHENOL_CONTAINING_COMPOUND_BIOSYNTHETIC_PROCESS	18	0.377343	1.18262	0.234127	0.670897	1	890	tags=22%, list=8%, signal=24%
GO_RESPONSE_TO_OSMOTIC_STRESS	30	0.348294	1.18194	0.257485	0.671878	1	3329	tags=47%, list=31%, signal=67%
GO_PROTEIN_AUTOPHOSPHORYLATION	115	0.286592	1.18184	0.240557	0.671261	1	2192	tags=25%, list=20%, signal=31%
GO_ACTIN_MONOMER_BINDING	15	0.404402	1.18178	0.26694	0.670561	1	612	tags=27%, list=6%, signal=28%
GO_CALCIUM_ION_BINDING	376	0.260454	1.18047	0.188825	0.673129	1	2289	tags=26%, list=21%, signal=32%
GO_SECRETION	321	0.254786	1.18024	0.169524	0.672865	1	2231	tags=26%, list=21%, signal=32%
GO_MEMORY	53	0.31306	1.18011	0.212181	0.67235	1	2328	tags=34%, list=21%, signal=43%
GO_REGULATION_OF_CALCIUM_ION_TRANSPORT	121	0.296268	1.18	0.21161	0.671806	1	2721	tags=35%, list=25%, signal=46%
GO_POSITIVE_REGULATION_OF_PHOSPHATASE_ACTIVITY	18	0.418614	1.17965	0.257519	0.671929	1	1536	tags=28%, list=14%, signal=32%
GO_REGULATION_OF_HOMEOSTATIC_PROCESS	259	0.250843	1.17953	0.188462	0.6714	1	2593	tags=30%, list=24%, signal=39%
GO_ENDOCYTOSIS	270	0.276547	1.17944	0.239006	0.670832	1	2886	tags=33%, list=27%, signal=44%
GO_REGULATION_OF_VASOCONSTRICTION	43	0.352597	1.17849	0.245211	0.672471	1	3279	tags=51%, list=30%, signal=73%
GO_VESICLE_COAT	20	0.375657	1.17825	0.240891	0.672248	1	4160	tags=55%, list=38%, signal=89%
GO_GUANYL_NUCLEOTIDE_EXCHANGE_FACTOR_ACTIVITY	168	0.276929	1.17779	0.215686	0.67264	1	2813	tags=35%, list=26%, signal=46%
GO_REGULATION_OF_MONOOXYGENASE_ACTIVITY	34	0.316824	1.17777	0.205761	0.671831	1	2328	tags=35%, list=21%, signal=45%
GO_CELLULAR_RESPONSE_TO_PROSTAGLANDIN_STIMULUS	15	0.426215	1.17771	0.243714	0.671123	1	1782	tags=40%, list=16%, signal=48%
GO_NEGATIVE_REGULATION_OF_REPRODUCTIVE_PROCESS	32	0.350578	1.17746	0.244444	0.670915	1	1616	tags=28%, list=15%, signal=33%
GO_PROTEIN_COMPLEX_INVOLVED_IN_CELL_ADHESION	16	0.469047	1.177	0.305085	0.671342	1	2505	tags=44%, list=23%, signal=57%
GO_CELLULAR_HOMEOSTASIS	381	0.246715	1.17683	0.152174	0.671	1	3347	tags=38%, list=31%, signal=53%
GO_NEGATIVE_REGULATION_OF_DEFENSE_RESPONSE	78	0.316876	1.17625	0.245545	0.671697	1	1155	tags=21%, list=11%, signal=23%
GO_REGULATION_OF_ACTIN_FILAMENT_BASED_PROCESS	168	0.266595	1.17446	0.212406	0.675523	1	2661	tags=33%, list=25%, signal=43%
GO_RESPONSE_TO_ACID_CHEMICAL	183	0.271791	1.17396	0.18146	0.675982	1	2553	tags=31%, list=24%, signal=40%
GO_REGULATION_OF_I_KAPPAB_KINASE_NF_KAPPAB_SIGNALING	130	0.280911	1.1738	0.235294	0.675533	1	2328	tags=27%, list=21%, signal=34%
GO_DNA_REPLICATION_DEPENDENT_NUCLEOSOME_ORGANIZATION	16	0.480208	1.17321	0.340681	0.676247	1	2753	tags=56%, list=25%, signal=75%
GO_NEGATIVE_REGULATION_OF_PROTEIN_CATABOLIC_PROCESS	64	0.275013	1.17305	0.214141	0.675778	1	1799	tags=23%, list=17%, signal=28%
GO_MALE_MEIOSIS	25	0.380885	1.17231	0.252809	0.676884	1	3277	tags=56%, list=30%, signal=80%
GO_REGULATION_OF_VASCULATURE_DEVELOPMENT	122	0.296398	1.17198	0.234043	0.676907	1	2530	tags=35%, list=23%, signal=45%
GO_ENDOSOME	444	0.24275	1.17194	0.217565	0.676175	1	2502	tags=27%, list=23%, signal=34%
GO_ENDOTHELIAL_CELL_DEVELOPMENT	26	0.375108	1.17176	0.272541	0.675839	1	2472	tags=38%, list=23%, signal=50%
GO_GOLGI_MEMBRANE	399	0.245142	1.17161	0.208163	0.675449	1	3226	tags=34%, list=30%, signal=46%
GO_POSITIVE_REGULATION_OF_NUCLEOCYTOPLASMIC_TRANSPORT	80	0.285049	1.1714	0.212644	0.675105	1	2607	tags=29%, list=24%, signal=38%
GO_NUCLEAR_CHROMATIN	165	0.267408	1.17077	0.244576	0.675899	1	2446	tags=29%, list=23%, signal=37%
GO_POSITIVE_REGULATION_OF_REACTIVE_OXYGEN_SPECIES_METABOLIC_PROCESS	50	0.350145	1.17062	0.252525	0.675448	1	2427	tags=32%, list=22%, signal=41%
GO_APICAL_PART_OF_CELL	200	0.254389	1.17017	0.181818	0.675827	1	2284	tags=26%, list=21%, signal=33%
GO_REGULATION_OF_BLOOD_PRESSURE	95	0.308211	1.17004	0.232692	0.675346	1	2593	tags=39%, list=24%, signal=51%
GO_GLUTAMINE_FAMILY_AMINO_ACID_CATABOLIC_PROCESS	15	0.416849	1.16995	0.255765	0.674707	1	1799	tags=40%, list=17%, signal=48%
GO_DNA_CATABOLIC_PROCESS_ENDONUCLEOLYTIC	15	0.396306	1.1699	0.261209	0.674006	1	2672	tags=40%, list=25%, signal=53%
GO_PROTEIN_KINASE_ACTIVITY	364	0.235058	1.16934	0.178431	0.674527	1	2545	tags=27%, list=24%, signal=35%
GO_REGULATION_OF_SMOOTH_MUSCLE_CELL_MIGRATION	33	0.359406	1.16859	0.274074	0.675588	1	2973	tags=39%, list=27%, signal=54%
GO_TRANS_GOLGI_NETWORK_TRANSPORT_VESICLE	15	0.390612	1.16838	0.273279	0.675384	1	1186	tags=20%, list=11%, signal=22%
GO_REGULATION_OF_CELL_SIZE	86	0.285297	1.16838	0.238477	0.674562	1	3348	tags=40%, list=31%, signal=57%
GO_SPINDLE_ASSEMBLY	41	0.359282	1.16835	0.278409	0.673784	1	3705	tags=44%, list=34%, signal=66%
GO_EPITHELIAL_CELL_MORPHOGENESIS	26	0.386198	1.1678	0.256311	0.674427	1	2436	tags=42%, list=22%, signal=54%
GO_MONOCARBOXYLIC_ACID_BINDING	33	0.354047	1.16726	0.262055	0.675013	1	3206	tags=42%, list=30%, signal=60%
GO_REGULATION_OF_STRESS_ACTIVATED_PROTEIN_KINASE_SIGNALING_CASCADE	124	0.271037	1.16719	0.235867	0.674374	1	1805	tags=26%, list=17%, signal=31%
GO_SECRETION_BY_CELL	265	0.257486	1.16595	0.185185	0.676806	1	2231	tags=26%, list=21%, signal=32%
GO_HYALURONAN_METABOLIC_PROCESS	22	0.38623	1.16542	0.25462	0.677332	1	2463	tags=36%, list=23%, signal=47%
GO_REGULATION_OF_CELL_PROJECTION_ASSEMBLY	88	0.267379	1.16534	0.218437	0.676704	1	2461	tags=28%, list=23%, signal=36%
GO_PROTEIN_SELF_ASSOCIATION	28	0.328408	1.16527	0.256917	0.676075	1	2484	tags=32%, list=23%, signal=42%
GO_SOMATIC_DIVERSIFICATION_OF_IMMUNE_RECEPTORS	23	0.366351	1.16522	0.265625	0.675389	1	1565	tags=26%, list=14%, signal=30%
GO_INTRINSIC_COMPONENT_OF_EXTERNAL_SIDE_OF_PLASMA_MEMBRANE	16	0.424346	1.16498	0.285996	0.675184	1	2463	tags=38%, list=23%, signal=48%
GO_REGULATION_OF_EXOCYTOSIS	100	0.274544	1.16487	0.206612	0.674647	1	2253	tags=29%, list=21%, signal=36%
GO_NEGATIVE_REGULATION_OF_INNATE_IMMUNE_RESPONSE	27	0.399073	1.16481	0.301181	0.67396	1	855	tags=22%, list=8%, signal=24%
GO_REGULATION_OF_REPRODUCTIVE_PROCESS	76	0.289909	1.1646	0.218504	0.673701	1	2108	tags=29%, list=19%, signal=36%
GO_REGULATION_OF_RESPONSE_TO_CYTOKINE_STIMULUS	69	0.314067	1.16444	0.259184	0.673282	1	1853	tags=28%, list=17%, signal=33%
GO_DEVELOPMENTAL_PROCESS_INVOLVED_IN_REPRODUCTION	335	0.249545	1.16411	0.192308	0.67334	1	2340	tags=27%, list=22%, signal=33%
GO_PHOSPHATIDYLGLYCEROL_METABOLIC_PROCESS	22	0.386018	1.164	0.267068	0.672846	1	721	tags=23%, list=7%, signal=24%
GO_NEGATIVE_REGULATION_OF_HISTONE_MODIFICATION	26	0.35839	1.16393	0.282051	0.672236	1	3132	tags=42%, list=29%, signal=59%
GO_TRANSPORT_VESICLE_MEMBRANE	76	0.29043	1.16372	0.222	0.67199	1	2924	tags=37%, list=27%, signal=50%
GO_REGULATION_OF_MAPK_CASCADE	395	0.251658	1.16351	0.207171	0.671708	1	1830	tags=23%, list=17%, signal=27%
GO_RESPONSE_TO_DSRNA	32	0.326551	1.16263	0.244821	0.673138	1	2834	tags=44%, list=26%, signal=59%
GO_REGULATION_OF_NOTCH_SIGNALING_PATHWAY	44	0.326974	1.16235	0.268199	0.67301	1	2191	tags=32%, list=20%, signal=40%
GO_REGULATION_OF_DEFENSE_RESPONSE_TO_VIRUS_BY_HOST	76	0.269256	1.16234	0.214286	0.67222	1	2499	tags=29%, list=23%, signal=37%
GO_DNA_CATABOLIC_PROCESS	20	0.362627	1.16188	0.293069	0.672617	1	2060	tags=35%, list=19%, signal=43%
GO_MUSCLE_CELL_DIFFERENTIATION	143	0.282645	1.16176	0.244533	0.672118	1	1821	tags=25%, list=17%, signal=30%
GO_TISSUE_REMODELING	58	0.318405	1.16017	0.248077	0.675452	1	1848	tags=28%, list=17%, signal=33%
GO_REGULATION_OF_COAGULATION	43	0.373239	1.15926	0.266272	0.677024	1	2040	tags=30%, list=19%, signal=37%
GO_CARDIAC_MUSCLE_TISSUE_DEVELOPMENT	93	0.308993	1.15899	0.234252	0.676906	1	2651	tags=38%, list=24%, signal=49%
GO_FATTY_ACID_METABOLIC_PROCESS	152	0.290888	1.15865	0.257545	0.676949	1	2516	tags=30%, list=23%, signal=39%
GO_POSITIVE_REGULATION_OF_RESPONSE_TO_BIOTIC_STIMULUS	26	0.367384	1.15787	0.286561	0.678209	1	1935	tags=31%, list=18%, signal=37%
GO_KERATIN_FILAMENT	50	0.763977	1.15766	0.109195	0.677944	1	1918	tags=84%, list=18%, signal=102%
GO_REGULATION_OF_STRIATED_MUSCLE_CELL_DIFFERENTIATION	51	0.339418	1.15676	0.25	0.679577	1	2275	tags=37%, list=21%, signal=47%
GO_RESPONSE_TO_IRON_ION	22	0.366157	1.15606	0.278788	0.68068	1	2779	tags=45%, list=26%, signal=61%
GO_COMPLEMENT_ACTIVATION	26	0.410655	1.15569	0.317814	0.680785	1	2377	tags=46%, list=22%, signal=59%
GO_REGULATION_OF_NITRIC_OXIDE_SYNTHASE_ACTIVITY	32	0.316218	1.1542	0.226994	0.683913	1	2877	tags=41%, list=27%, signal=55%
GO_NEGATIVE_REGULATION_OF_EXTRINSIC_APOPTOTIC_SIGNALING_PATHWAY	60	0.29326	1.15395	0.23029	0.683793	1	2569	tags=30%, list=24%, signal=39%
GO_SISTER_CHROMATID_SEGREGATION	98	0.358883	1.15261	0.308851	0.686427	1	3503	tags=46%, list=32%, signal=67%
GO_RESPONSE_TO_MECHANICAL_STIMULUS	121	0.27739	1.15211	0.235849	0.686919	1	2366	tags=27%, list=22%, signal=35%
GO_POSITIVE_REGULATION_OF_PROTEIN_LOCALIZATION_TO_NUCLEUS	86	0.270477	1.15143	0.221374	0.687827	1	2716	tags=30%, list=25%, signal=40%
GO_ENDOCRINE_PANCREAS_DEVELOPMENT	26	0.348038	1.15053	0.284848	0.689322	1	3073	tags=42%, list=28%, signal=59%
GO_NEGATIVE_REGULATION_OF_ERBB_SIGNALING_PATHWAY	21	0.352399	1.15014	0.284333	0.689546	1	2387	tags=29%, list=22%, signal=37%
GO_REGULATION_OF_GROWTH	351	0.229712	1.14992	0.186275	0.689335	1	2289	tags=26%, list=21%, signal=32%
GO_INTRINSIC_APOPTOTIC_SIGNALING_PATHWAY_IN_RESPONSE_TO_DNA_DAMAGE	45	0.290431	1.14969	0.253012	0.689108	1	3277	tags=42%, list=30%, signal=60%
GO_STEM_CELL_DIFFERENTIATION	117	0.276344	1.14969	0.235867	0.688319	1	1818	tags=26%, list=17%, signal=30%
GO_PROTEIN_DNA_COMPLEX	85	0.327481	1.14952	0.296748	0.687956	1	3655	tags=47%, list=34%, signal=70%
GO_DEMETHYLASE_ACTIVITY	21	0.395146	1.14864	0.293635	0.689438	1	1821	tags=29%, list=17%, signal=34%
GO_REGULATION_OF_VACUOLAR_TRANSPORT	17	0.389367	1.14839	0.299795	0.6893	1	1124	tags=29%, list=10%, signal=33%
GO_LONG_CHAIN_FATTY_ACID_TRANSPORT	28	0.332739	1.14837	0.251485	0.688537	1	1262	tags=25%, list=12%, signal=28%
GO_ACROSOMAL_VESICLE	47	0.310863	1.14665	0.237255	0.692266	1	1600	tags=28%, list=15%, signal=32%
GO_OOCYTE_DIFFERENTIATION	23	0.349644	1.14658	0.276553	0.691647	1	1635	tags=30%, list=15%, signal=36%
GO_MYD88_DEPENDENT_TOLL_LIKE_RECEPTOR_SIGNALING_PATHWAY	15	0.408834	1.14593	0.302326	0.692619	1	5081	tags=80%, list=47%, signal=151%
GO_CLATHRIN_COATED_ENDOCYTIC_VESICLE_MEMBRANE	21	0.425654	1.14558	0.32233	0.692773	1	2374	tags=52%, list=22%, signal=67%
GO_SUPRAMOLECULAR_FIBER	378	0.307269	1.14515	0.230624	0.693011	1	2998	tags=40%, list=28%, signal=53%
GO_VASCULATURE_DEVELOPMENT	256	0.278885	1.14483	0.265896	0.693109	1	2530	tags=31%, list=23%, signal=40%
GO_CARDIAC_CELL_DEVELOPMENT	26	0.391058	1.14477	0.297619	0.692451	1	3677	tags=65%, list=34%, signal=99%
GO_POSITIVE_REGULATION_OF_PROTEIN_MODIFICATION_BY_SMALL_PROTEIN_CONJUGATION_OR_REMOVAL	110	0.273027	1.14347	0.265347	0.695079	1	3865	tags=46%, list=36%, signal=71%
GO_EXTRACELLULAR_LIGAND_GATED_ION_CHANNEL_ACTIVITY	43	0.331114	1.14268	0.276596	0.696366	1	1998	tags=35%, list=18%, signal=43%
GO_LIPID_LOCALIZATION	153	0.261091	1.14261	0.236295	0.695763	1	2564	tags=29%, list=24%, signal=38%
GO_LONG_TERM_SYNAPTIC_POTENTIATION	19	0.37296	1.1422	0.2751	0.696042	1	2769	tags=53%, list=26%, signal=71%
GO_ORGANIC_ACID_BINDING	106	0.264597	1.14142	0.23	0.697345	1	2525	tags=29%, list=23%, signal=38%
GO_POSITIVE_REGULATION_OF_CELL_CYCLE_PROCESS	143	0.264332	1.14119	0.258252	0.69716	1	2387	tags=28%, list=22%, signal=35%
GO_RESPONSE_TO_ETHANOL	84	0.283581	1.14082	0.26087	0.697243	1	1418	tags=24%, list=13%, signal=27%
GO_REGULATION_OF_OXIDOREDUCTASE_ACTIVITY	51	0.295125	1.14041	0.259414	0.697498	1	2328	tags=31%, list=21%, signal=40%
GO_CYCLIN_DEPENDENT_PROTEIN_KINASE_ACTIVITY	20	0.358452	1.14027	0.285115	0.697048	1	3945	tags=50%, list=36%, signal=79%
GO_POSITIVE_REGULATION_OF_MITOTIC_CELL_CYCLE	73	0.293823	1.14017	0.241905	0.69655	1	1792	tags=23%, list=17%, signal=28%
GO_RESPIRATORY_GASEOUS_EXCHANGE	29	0.337007	1.1395	0.293561	0.697565	1	2364	tags=31%, list=22%, signal=40%
GO_CARBON_CARBON_LYASE_ACTIVITY	26	0.341581	1.13945	0.281893	0.696903	1	1861	tags=35%, list=17%, signal=42%
GO_SARCOLEMMA	67	0.312458	1.13945	0.266038	0.69611	1	1673	tags=24%, list=15%, signal=28%
GO_POSITIVE_REGULATION_OF_REPRODUCTIVE_PROCESS	30	0.3293	1.13938	0.26145	0.695506	1	2108	tags=33%, list=19%, signal=41%
GO_COLUMNAR_CUBOIDAL_EPITHELIAL_CELL_DIFFERENTIATION	60	0.294544	1.13899	0.243948	0.695664	1	2571	tags=30%, list=24%, signal=39%
GO_PROTEIN_SERINE_THREONINE_KINASE_ACTIVITY	265	0.231606	1.13836	0.212851	0.696632	1	2545	tags=26%, list=24%, signal=34%
GO_REGULATION_OF_PROTEIN_SERINE_THREONINE_KINASE_ACTIVITY	290	0.232984	1.13807	0.24031	0.696565	1	2506	tags=26%, list=23%, signal=32%
GO_CATION_CATION_ANTIPORTER_ACTIVITY	15	0.391132	1.13798	0.292585	0.696036	1	2211	tags=40%, list=20%, signal=50%
GO_POSITIVE_REGULATION_OF_CYTOSKELETON_ORGANIZATION	94	0.262309	1.13752	0.237548	0.696458	1	2973	tags=35%, list=27%, signal=48%
GO_GOLGI_ASSOCIATED_VESICLE_MEMBRANE	27	0.34284	1.13722	0.279678	0.696472	1	4160	tags=44%, list=38%, signal=72%
GO_G_PROTEIN_COUPLED_AMINE_RECEPTOR_ACTIVITY	25	0.367533	1.13661	0.270325	0.697234	1	2326	tags=32%, list=21%, signal=41%
GO_ENDOCRINE_SYSTEM_DEVELOPMENT	70	0.302937	1.13658	0.254	0.696499	1	2299	tags=31%, list=21%, signal=40%
GO_REGULATION_OF_RENAL_SYSTEM_PROCESS	19	0.403629	1.13636	0.300797	0.696339	1	3273	tags=53%, list=30%, signal=75%
GO_REGULATION_OF_NITRIC_OXIDE_BIOSYNTHETIC_PROCESS	32	0.362648	1.13614	0.309198	0.696134	1	3437	tags=47%, list=32%, signal=68%
GO_PEPTIDYL_SERINE_MODIFICATION	94	0.262804	1.13609	0.242857	0.695483	1	2530	tags=26%, list=23%, signal=33%
GO_OXIDOREDUCTASE_ACTIVITY_ACTING_ON_SINGLE_DONORS_WITH_INCORPORATION_OF_MOLECULAR_OXYGEN	17	0.389532	1.13559	0.282	0.695945	1	2426	tags=29%, list=22%, signal=38%
GO_CHROMATIN	244	0.259005	1.13544	0.27381	0.695582	1	3111	tags=33%, list=29%, signal=46%
GO_MYELOID_CELL_DIFFERENTIATION	116	0.271216	1.1351	0.262	0.695629	1	2461	tags=30%, list=23%, signal=39%
GO_TRANSLESION_SYNTHESIS	22	0.368331	1.13499	0.329435	0.695118	1	3541	tags=50%, list=33%, signal=74%
GO_DIOXYGENASE_ACTIVITY	41	0.304753	1.13458	0.278119	0.695489	1	2546	tags=29%, list=24%, signal=38%
GO_CELLULAR_RESPONSE_TO_HEAT	21	0.361614	1.13448	0.297872	0.694964	1	3895	tags=43%, list=36%, signal=67%
GO_TRANSCRIPTION_FACTOR_ACTIVITY_RNA_POLYMERASE_II_DISTAL_ENHANCER_SEQUENCE_SPECIFIC_BINDING	51	0.319982	1.13408	0.292543	0.6952	1	3440	tags=47%, list=32%, signal=69%
GO_APOPTOTIC_NUCLEAR_CHANGES	17	0.370549	1.13386	0.303571	0.695049	1	2348	tags=35%, list=22%, signal=45%
GO_PERINUCLEAR_REGION_OF_CYTOPLASM	379	0.220313	1.13361	0.212679	0.694894	1	2906	tags=31%, list=27%, signal=40%
GO_REGULATION_OF_REACTIVE_OXYGEN_SPECIES_METABOLIC_PROCESS	82	0.291865	1.1336	0.279612	0.694159	1	2427	tags=30%, list=22%, signal=39%
GO_NCRNA_CATABOLIC_PROCESS	19	0.36696	1.13353	0.317797	0.693559	1	3656	tags=47%, list=34%, signal=71%
GO_CORTICAL_CYTOSKELETON_ORGANIZATION	20	0.35432	1.13349	0.293774	0.692913	1	1601	tags=35%, list=15%, signal=41%
GO_NEGATIVE_REGULATION_OF_EXTRINSIC_APOPTOTIC_SIGNALING_PATHWAY_VIA_DEATH_DOMAIN_RECEPTORS	19	0.401744	1.13327	0.326316	0.692783	1	970	tags=26%, list=9%, signal=29%
GO_REGULATION_OF_EXTRINSIC_APOPTOTIC_SIGNALING_PATHWAY	92	0.278267	1.13293	0.255717	0.692971	1	3342	tags=40%, list=31%, signal=58%
GO_POSTREPLICATION_REPAIR	27	0.357282	1.1329	0.303922	0.692302	1	3541	tags=48%, list=33%, signal=71%
GO_SMALL_GTPASE_MEDIATED_SIGNAL_TRANSDUCTION	209	0.240102	1.13276	0.245681	0.691862	1	3063	tags=36%, list=28%, signal=50%
GO_CYTOPLASMIC_MICROTUBULE_ORGANIZATION	26	0.337813	1.13198	0.299807	0.69313	1	2291	tags=31%, list=21%, signal=39%
GO_REGULATION_OF_AXONOGENESIS	86	0.285443	1.13171	0.267068	0.693059	1	1376	tags=22%, list=13%, signal=25%
GO_LEADING_EDGE_MEMBRANE	78	0.272918	1.13149	0.2607	0.692798	1	2799	tags=35%, list=26%, signal=46%
GO_ENDOCARDIAL_CUSHION_MORPHOGENESIS	17	0.40755	1.1314	0.319838	0.692246	1	1622	tags=29%, list=15%, signal=35%
GO_PHOSPHATIDYLCHOLINE_BIOSYNTHETIC_PROCESS	15	0.38478	1.13124	0.299618	0.691892	1	388	tags=20%, list=4%, signal=21%
GO_RESPONSE_TO_ESTROGEN	130	0.262082	1.13035	0.249004	0.693326	1	2505	tags=29%, list=23%, signal=38%
GO_FC_RECEPTOR_SIGNALING_PATHWAY	108	0.293368	1.13029	0.321569	0.692728	1	3230	tags=38%, list=30%, signal=54%
GO_RESPONSE_TO_STEROID_HORMONE	297	0.234548	1.13028	0.213861	0.692016	1	3177	tags=34%, list=29%, signal=47%
GO_SIGNAL_TRANSDUCTION_IN_ABSENCE_OF_LIGAND	21	0.347841	1.13017	0.28866	0.691504	1	2328	tags=33%, list=21%, signal=42%
GO_ENDOCARDIAL_CUSHION_DEVELOPMENT	22	0.387475	1.12998	0.317719	0.691238	1	1622	tags=27%, list=15%, signal=32%
GO_EXTRINSIC_APOPTOTIC_SIGNALING_PATHWAY_VIA_DEATH_DOMAIN_RECEPTORS	23	0.344553	1.12982	0.309426	0.690883	1	2607	tags=43%, list=24%, signal=57%
GO_RESPONSE_TO_GROWTH_HORMONE	16	0.395822	1.12958	0.305051	0.690785	1	2607	tags=44%, list=24%, signal=58%
GO_HYDROLASE_ACTIVITY_ACTING_ON_CARBON_NITROGEN_BUT_NOT_PEPTIDE_BONDS	85	0.258561	1.12926	0.242363	0.690858	1	2997	tags=36%, list=28%, signal=50%
GO_GROWTH_FACTOR_ACTIVITY	88	0.30349	1.12826	0.277992	0.692707	1	1762	tags=27%, list=16%, signal=32%
GO_BILE_ACID_METABOLIC_PROCESS	17	0.40061	1.12807	0.280702	0.692468	1	1373	tags=35%, list=13%, signal=40%
GO_DEFENSE_RESPONSE_TO_FUNGUS	20	0.432636	1.12802	0.298246	0.691839	1	1748	tags=45%, list=16%, signal=54%
GO_NIK_NF_KAPPAB_SIGNALING	50	0.341819	1.12759	0.331313	0.692203	1	4088	tags=56%, list=38%, signal=90%
GO_BINDING_BRIDGING	101	0.264691	1.12758	0.27593	0.691486	1	2933	tags=40%, list=27%, signal=54%
GO_SULFOTRANSFERASE_ACTIVITY	29	0.35713	1.1275	0.322176	0.690974	1	3178	tags=45%, list=29%, signal=63%
GO_REGULATION_OF_TELOMERE_CAPPING	15	0.373556	1.1275	0.318359	0.690237	1	4304	tags=53%, list=40%, signal=88%
GO_CELLULAR_METABOLIC_COMPOUND_SALVAGE	24	0.340923	1.12614	0.287698	0.692948	1	1323	tags=21%, list=12%, signal=24%
GO_AMIDE_BINDING	143	0.252931	1.12614	0.262846	0.692212	1	3536	tags=43%, list=33%, signal=64%
GO_POSITIVE_REGULATION_OF_RECEPTOR_INTERNALIZATION	16	0.368767	1.12602	0.300403	0.691767	1	2713	tags=31%, list=25%, signal=42%
GO_CELLULAR_CHEMICAL_HOMEOSTASIS	321	0.240064	1.12574	0.233463	0.691774	1	2891	tags=32%, list=27%, signal=42%
GO_RESPONSE_TO_ALKALOID	80	0.274982	1.12562	0.245473	0.691358	1	2838	tags=36%, list=26%, signal=49%
GO_AGING	160	0.261827	1.12557	0.258824	0.690774	1	2606	tags=31%, list=24%, signal=40%
GO_ADP_BINDING	19	0.356694	1.12447	0.29703	0.692933	1	1871	tags=32%, list=17%, signal=38%
GO_POSITIVE_REGULATION_OF_I_KAPPAB_KINASE_NF_KAPPAB_SIGNALING	95	0.280785	1.12436	0.298419	0.692441	1	2328	tags=27%, list=21%, signal=35%
GO_CELL_PROJECTION_MEMBRANE	168	0.238643	1.1235	0.237624	0.693875	1	2799	tags=32%, list=26%, signal=42%
GO_POSITIVE_REGULATION_OF_DNA_BIOSYNTHETIC_PROCESS	39	0.321389	1.12331	0.303502	0.69363	1	1805	tags=23%, list=17%, signal=28%
GO_REGULATION_OF_STRIATED_MUSCLE_CONTRACTION	46	0.308291	1.12281	0.283809	0.694191	1	1378	tags=26%, list=13%, signal=30%
GO_REGULATION_OF_PEPTIDE_SECRETION	104	0.264471	1.12271	0.238569	0.693686	1	2679	tags=37%, list=25%, signal=48%
GO_LABYRINTHINE_LAYER_DEVELOPMENT	23	0.374693	1.12253	0.329412	0.693449	1	2340	tags=35%, list=22%, signal=44%
GO_POSITIVE_REGULATION_OF_NOTCH_SIGNALING_PATHWAY	22	0.355663	1.12247	0.307393	0.692876	1	2191	tags=45%, list=20%, signal=57%
GO_CARDIAC_MUSCLE_CELL_DIFFERENTIATION	46	0.323825	1.12158	0.315574	0.694424	1	3503	tags=50%, list=32%, signal=74%
GO_HETEROPHILIC_CELL_CELL_ADHESION_VIA_PLASMA_MEMBRANE_CELL_ADHESION_MOLECULES	20	0.41034	1.12129	0.350282	0.694392	1	1257	tags=25%, list=12%, signal=28%
GO_BLOOD_VESSEL_MORPHOGENESIS	195	0.279232	1.1208	0.284314	0.694889	1	2530	tags=32%, list=23%, signal=41%
GO_RESPONSE_TO_ARSENIC_CONTAINING_SUBSTANCE	18	0.384306	1.12063	0.314928	0.694629	1	3282	tags=56%, list=30%, signal=80%
GO_CHEMOREPELLENT_ACTIVITY	16	0.401555	1.12014	0.324803	0.695072	1	3348	tags=56%, list=31%, signal=81%
GO_POSITIVE_REGULATION_OF_PROTEIN_COMPLEX_ASSEMBLY	92	0.249868	1.11938	0.266667	0.69622	1	1624	tags=21%, list=15%, signal=24%
GO_HISTONE_DEACETYLASE_BINDING	59	0.273277	1.11824	0.295276	0.698354	1	1248	tags=17%, list=12%, signal=19%
GO_CELL_CORTEX_PART	61	0.278416	1.11778	0.283465	0.698816	1	2284	tags=28%, list=21%, signal=35%
GO_EPIDERMAL_GROWTH_FACTOR_RECEPTOR_SIGNALING_PATHWAY	30	0.345443	1.11661	0.319767	0.701027	1	1191	tags=20%, list=11%, signal=22%
GO_NUCLEAR_REPLICATION_FORK	22	0.386494	1.11619	0.340509	0.701324	1	3968	tags=68%, list=37%, signal=107%
GO_POSITIVE_REGULATION_OF_VASCULATURE_DEVELOPMENT	75	0.306007	1.11616	0.309942	0.700671	1	2530	tags=35%, list=23%, signal=45%
GO_REGULATION_OF_RETINOIC_ACID_RECEPTOR_SIGNALING_PATHWAY	15	0.39823	1.11607	0.319277	0.700165	1	500	tags=20%, list=5%, signal=21%
GO_CELLULAR_RESPONSE_TO_ALKALOID	16	0.384874	1.11594	0.310212	0.699762	1	1589	tags=25%, list=15%, signal=29%
GO_POSITIVE_REGULATION_OF_TUMOR_NECROSIS_FACTOR_SUPERFAMILY_CYTOKINE_PRODUCTION	30	0.407354	1.11553	0.34638	0.700037	1	3362	tags=50%, list=31%, signal=72%
GO_CELLULAR_RESPONSE_TO_OXYGEN_CONTAINING_COMPOUND	466	0.23246	1.11536	0.260618	0.699749	1	2578	tags=28%, list=24%, signal=35%
GO_PTERIDINE_CONTAINING_COMPOUND_METABOLIC_PROCESS	20	0.36832	1.11457	0.307692	0.701097	1	3703	tags=45%, list=34%, signal=68%
GO_ATPASE_REGULATOR_ACTIVITY	18	0.380534	1.11401	0.30099	0.701829	1	4314	tags=67%, list=40%, signal=111%
GO_FATTY_ACYL_COA_METABOLIC_PROCESS	23	0.3774	1.11376	0.323944	0.701734	1	1887	tags=30%, list=17%, signal=37%
GO_NEGATIVE_REGULATION_OF_G_PROTEIN_COUPLED_RECEPTOR_PROTEIN_SIGNALING_PATHWAY	22	0.357722	1.11357	0.288462	0.701528	1	1012	tags=18%, list=9%, signal=20%
GO_CERAMIDE_BIOSYNTHETIC_PROCESS	24	0.381316	1.11356	0.338583	0.700824	1	1733	tags=33%, list=16%, signal=40%
GO_REGULATION_OF_CELL_DIVISION	165	0.257881	1.11338	0.299803	0.700564	1	1672	tags=21%, list=15%, signal=24%
GO_CIRCULATORY_SYSTEM_PROCESS	223	0.267305	1.11283	0.298279	0.701269	1	2543	tags=35%, list=23%, signal=44%
GO_MULTICELLULAR_ORGANISM_REPRODUCTION	408	0.221451	1.1123	0.216535	0.701906	1	2877	tags=30%, list=27%, signal=40%
GO_ENDOTHELIUM_DEVELOPMENT	46	0.317601	1.11169	0.324324	0.702738	1	2472	tags=35%, list=23%, signal=45%
GO_POSITIVE_REGULATION_OF_FIBROBLAST_PROLIFERATION	31	0.323211	1.11136	0.301136	0.702885	1	1603	tags=26%, list=15%, signal=30%
GO_PROTEIN_KINASE_C_BINDING	31	0.312095	1.11113	0.325253	0.702795	1	452	tags=13%, list=4%, signal=13%
GO_VENTRICULAR_CARDIAC_MUSCLE_TISSUE_DEVELOPMENT	29	0.367894	1.11079	0.32833	0.702989	1	2436	tags=38%, list=22%, signal=49%
GO_REGULATION_OF_ACTIN_FILAMENT_BASED_MOVEMENT	18	0.379262	1.11078	0.321033	0.702294	1	1848	tags=33%, list=17%, signal=40%
GO_REGULATION_OF_MITOTIC_CELL_CYCLE	284	0.235693	1.10995	0.266019	0.703724	1	2832	tags=29%, list=26%, signal=38%
GO_G_PROTEIN_ALPHA_SUBUNIT_BINDING	16	0.3745	1.109	0.308911	0.705304	1	427	tags=19%, list=4%, signal=19%
GO_SPHINGOLIPID_BIOSYNTHETIC_PROCESS	41	0.324872	1.10887	0.329365	0.704914	1	1733	tags=27%, list=16%, signal=32%
GO_DEVELOPMENTAL_MATURATION	105	0.252087	1.10852	0.269903	0.705089	1	1732	tags=25%, list=16%, signal=29%
GO_ORGANIC_ACID_BIOSYNTHETIC_PROCESS	142	0.252997	1.10825	0.277445	0.705059	1	1549	tags=21%, list=14%, signal=24%
GO_MYOTUBE_DIFFERENTIATION	34	0.330953	1.10822	0.301619	0.704406	1	3527	tags=44%, list=33%, signal=65%
GO_MHC_PROTEIN_BINDING	18	0.450705	1.10808	0.391473	0.704011	1	2954	tags=50%, list=27%, signal=69%
GO_ACTIN_FILAMENT_BASED_MOVEMENT	47	0.347338	1.10793	0.343023	0.7037	1	2763	tags=49%, list=26%, signal=65%
GO_RECEPTOR_SIGNALING_PROTEIN_SERINE_THREONINE_KINASE_ACTIVITY	52	0.287141	1.10776	0.290258	0.703444	1	1767	tags=25%, list=16%, signal=30%
GO_NEGATIVE_REGULATION_OF_VIRAL_PROCESS	51	0.319279	1.10751	0.327381	0.703372	1	1830	tags=25%, list=17%, signal=31%
GO_ORGANIC_HYDROXY_COMPOUND_CATABOLIC_PROCESS	47	0.312601	1.1072	0.302372	0.703455	1	1494	tags=23%, list=14%, signal=27%
GO_ALDITOL_PHOSPHATE_METABOLIC_PROCESS	24	0.340286	1.10692	0.308824	0.703418	1	1881	tags=25%, list=17%, signal=30%
GO_ENDODERMAL_CELL_DIFFERENTIATION	25	0.354318	1.10677	0.321429	0.703072	1	1925	tags=32%, list=18%, signal=39%
GO_CHROMOSOME_TELOMERIC_REGION	87	0.290162	1.1067	0.316832	0.702538	1	2753	tags=31%, list=25%, signal=41%
GO_REGULATION_OF_REACTIVE_OXYGEN_SPECIES_BIOSYNTHETIC_PROCESS	39	0.333427	1.10658	0.313373	0.702127	1	3437	tags=46%, list=32%, signal=67%
GO_RENAL_WATER_HOMEOSTASIS	20	0.348957	1.10544	0.30695	0.704379	1	2577	tags=45%, list=24%, signal=59%
GO_SNRNA_METABOLIC_PROCESS	37	0.317266	1.10491	0.319588	0.705017	1	3338	tags=43%, list=31%, signal=62%
GO_POSITIVE_REGULATION_OF_CELL_DEATH	357	0.226125	1.10469	0.251497	0.70484	1	2593	tags=28%, list=24%, signal=35%
GO_MAINTENANCE_OF_LOCATION_IN_CELL	51	0.287449	1.10431	0.312749	0.705067	1	2834	tags=39%, list=26%, signal=53%
GO_INTERMEDIATE_FILAMENT_CYTOSKELETON	123	0.518577	1.10431	0.273423	0.704374	1	1918	tags=52%, list=18%, signal=63%
GO_MYD88_INDEPENDENT_TOLL_LIKE_RECEPTOR_SIGNALING_PATHWAY	19	0.387046	1.10407	0.375242	0.704267	1	3541	tags=58%, list=33%, signal=86%
GO_CYTOPLASMIC_VESICLE_PART	333	0.239658	1.10356	0.275362	0.704781	1	2941	tags=30%, list=27%, signal=40%
GO_CALCIUM_ION_IMPORT	39	0.298006	1.10352	0.323017	0.704176	1	607	tags=18%, list=6%, signal=19%
GO_MALE_SEX_DIFFERENTIATION	90	0.273893	1.10296	0.302505	0.704802	1	1635	tags=22%, list=15%, signal=26%
GO_SPINDLE_LOCALIZATION	21	0.362432	1.10188	0.335968	0.706788	1	3073	tags=43%, list=28%, signal=60%
GO_REGULATION_OF_CELL_CYCLE_PROCESS	343	0.231505	1.10183	0.299228	0.706202	1	2919	tags=30%, list=27%, signal=39%
GO_CELLULAR_RESPONSE_TO_ORGANIC_CYCLIC_COMPOUND	274	0.22446	1.10054	0.280702	0.708936	1	3164	tags=32%, list=29%, signal=45%
GO_REGULATION_OF_KERATINOCYTE_DIFFERENTIATION	16	0.386612	1.10049	0.348515	0.708363	1	1068	tags=19%, list=10%, signal=21%
GO_CELL_FATE_DETERMINATION	32	0.329704	1.10003	0.327416	0.708813	1	2482	tags=34%, list=23%, signal=44%
GO_SECOND_MESSENGER_MEDIATED_SIGNALING	98	0.26322	1.09989	0.301961	0.708473	1	2177	tags=26%, list=20%, signal=32%
GO_REGULATION_OF_ION_TRANSPORT	330	0.23257	1.09985	0.273408	0.707856	1	2776	tags=32%, list=26%, signal=41%
GO_NEGATIVE_REGULATION_OF_RESPONSE_TO_CYTOKINE_STIMULUS	28	0.346404	1.09965	0.344468	0.707633	1	2834	tags=43%, list=26%, signal=58%
GO_POSITIVE_REGULATION_OF_CELL_CYCLE_G1_S_PHASE_TRANSITION	19	0.357413	1.09963	0.323529	0.706957	1	3322	tags=47%, list=31%, signal=68%
GO_POSITIVE_REGULATION_OF_LIGASE_ACTIVITY	60	0.321826	1.09949	0.348337	0.706605	1	3865	tags=50%, list=36%, signal=77%
GO_POSITIVE_REGULATION_OF_CELLULAR_COMPONENT_BIOGENESIS	207	0.227703	1.09911	0.267442	0.706905	1	2886	tags=29%, list=27%, signal=39%
GO_PHOSPHATIDYLINOSITOL_3_4_5_TRISPHOSPHATE_BINDING	23	0.341147	1.09834	0.319923	0.708098	1	1688	tags=26%, list=16%, signal=31%
GO_ACTIN_FILAMENT_BASED_PROCESS	250	0.24481	1.09806	0.281905	0.708063	1	2786	tags=34%, list=26%, signal=44%
GO_SECONDARY_METABOLIC_PROCESS	22	0.40729	1.09711	0.316327	0.709742	1	1261	tags=32%, list=12%, signal=36%
GO_NEGATIVE_REGULATION_OF_CELL_PROJECTION_ORGANIZATION	87	0.274212	1.09692	0.310891	0.709517	1	2381	tags=28%, list=22%, signal=35%
GO_GUANYL_NUCLEOTIDE_BINDING	201	0.229306	1.09661	0.288577	0.70958	1	2749	tags=29%, list=25%, signal=39%
GO_REGULATION_OF_ACUTE_INFLAMMATORY_RESPONSE	44	0.319913	1.09645	0.327553	0.709252	1	2484	tags=41%, list=23%, signal=53%
GO_NEUROTRANSMITTER_BINDING	19	0.366527	1.0964	0.327273	0.708684	1	2236	tags=42%, list=21%, signal=53%
GO_NUCLEAR_CHROMOSOME_SEGREGATION	127	0.321769	1.0958	0.364504	0.709562	1	3503	tags=45%, list=32%, signal=66%
GO_DICARBOXYLIC_ACID_TRANSPORT	35	0.312879	1.09528	0.323529	0.710314	1	2884	tags=40%, list=27%, signal=54%
GO_POSITIVE_REGULATION_OF_B_CELL_PROLIFERATION	21	0.387984	1.09524	0.368121	0.709698	1	1489	tags=33%, list=14%, signal=39%
GO_SOLUTE_CATION_ANTIPORTER_ACTIVITY	18	0.365267	1.09516	0.320084	0.709215	1	2211	tags=33%, list=20%, signal=42%
GO_ASTROCYTE_DIFFERENTIATION	25	0.326105	1.09385	0.335821	0.711906	1	3073	tags=48%, list=28%, signal=67%
GO_EXCRETION	21	0.371771	1.0933	0.346555	0.712608	1	2497	tags=48%, list=23%, signal=62%
GO_CELL_CELL_SIGNALING	402	0.242317	1.09316	0.3	0.712236	1	2861	tags=34%, list=26%, signal=45%
GO_SKELETAL_MUSCLE_CONTRACTION	17	0.44849	1.09305	0.382643	0.71178	1	1738	tags=41%, list=16%, signal=49%
GO_PHOTORECEPTOR_OUTER_SEGMENT	34	0.320533	1.09302	0.340771	0.711157	1	2952	tags=47%, list=27%, signal=64%
GO_DNA_MODIFICATION	51	0.294779	1.09087	0.341004	0.715969	1	1294	tags=20%, list=12%, signal=22%
GO_CARBOXY_LYASE_ACTIVITY	16	0.369164	1.09032	0.356275	0.716644	1	1861	tags=44%, list=17%, signal=53%
GO_STEROID_HORMONE_RECEPTOR_BINDING	49	0.281607	1.0903	0.323711	0.716017	1	2162	tags=24%, list=20%, signal=30%
GO_VOLTAGE_GATED_CALCIUM_CHANNEL_COMPLEX	23	0.363212	1.0895	0.339286	0.717325	1	1137	tags=26%, list=11%, signal=29%
GO_AUTOPHAGOSOME_MEMBRANE	19	0.351517	1.08922	0.338174	0.717321	1	1379	tags=32%, list=13%, signal=36%
GO_INTERMEDIATE_FILAMENT	100	0.572358	1.08874	0.300766	0.717772	1	1918	tags=60%, list=18%, signal=72%
GO_KINESIN_COMPLEX	29	0.335845	1.08866	0.351852	0.717251	1	2176	tags=34%, list=20%, signal=43%
GO_PROTEIN_HOMODIMERIZATION_ACTIVITY	398	0.207352	1.08863	0.249027	0.716647	1	2315	tags=24%, list=21%, signal=30%
GO_REGULATION_OF_CELL_CYCLE_G1_S_PHASE_TRANSITION	96	0.253556	1.08825	0.310547	0.716926	1	2788	tags=32%, list=26%, signal=43%
GO_CELL_KILLING	21	0.365762	1.08822	0.34127	0.716323	1	3827	tags=67%, list=35%, signal=103%
GO_NEGATIVE_REGULATION_OF_CYSTEINE_TYPE_ENDOPEPTIDASE_ACTIVITY	54	0.27656	1.08708	0.324111	0.718512	1	1221	tags=17%, list=11%, signal=19%
GO_REGULATION_OF_METAL_ION_TRANSPORT	185	0.241774	1.08696	0.300184	0.718105	1	2231	tags=25%, list=21%, signal=31%
GO_REGULATION_OF_POTASSIUM_ION_TRANSPORT	50	0.291835	1.08559	0.314516	0.720885	1	1433	tags=22%, list=13%, signal=25%
GO_CELL_LEADING_EDGE	210	0.236323	1.08509	0.312741	0.721415	1	2799	tags=31%, list=26%, signal=41%
GO_NEGATIVE_REGULATION_OF_INTRINSIC_APOPTOTIC_SIGNALING_PATHWAY	49	0.284221	1.085	0.337449	0.720942	1	2569	tags=33%, list=24%, signal=43%
GO_RESPONSE_TO_DEXAMETHASONE	19	0.356166	1.0839	0.332703	0.722945	1	3719	tags=47%, list=34%, signal=72%
GO_CELL_ADHESION_MOLECULE_BINDING	97	0.284974	1.0836	0.353167	0.72304	1	2780	tags=35%, list=26%, signal=47%
GO_INOSITOL_LIPID_MEDIATED_SIGNALING	68	0.271657	1.08334	0.323017	0.722993	1	1762	tags=24%, list=16%, signal=28%
GO_REGULATION_OF_CELL_CYCLE_CHECKPOINT	22	0.368308	1.08251	0.372549	0.724466	1	3559	tags=41%, list=33%, signal=61%
GO_HEAT_SHOCK_PROTEIN_BINDING	47	0.288231	1.08205	0.333333	0.724929	1	3236	tags=36%, list=30%, signal=51%
GO_REGULATION_OF_CYTOSKELETON_ORGANIZATION	287	0.226521	1.0813	0.29901	0.726205	1	2973	tags=31%, list=27%, signal=41%
GO_POSITIVE_REGULATION_OF_STRESS_ACTIVATED_PROTEIN_KINASE_SIGNALING_CASCADE	88	0.270748	1.08114	0.339321	0.725938	1	2387	tags=32%, list=22%, signal=40%
GO_INTEGRIN_MEDIATED_SIGNALING_PATHWAY	47	0.32306	1.07919	0.387033	0.730198	1	2530	tags=38%, list=23%, signal=50%
GO_REGULATION_OF_RECEPTOR_INTERNALIZATION	24	0.311304	1.0786	0.343137	0.731023	1	2713	tags=29%, list=25%, signal=39%
GO_GERM_CELL_DEVELOPMENT	113	0.250547	1.07705	0.306288	0.734409	1	2301	tags=27%, list=21%, signal=33%
GO_MUSCLE_TISSUE_DEVELOPMENT	172	0.25978	1.07625	0.333977	0.735775	1	3527	tags=42%, list=33%, signal=62%
GO_KINESIN_BINDING	17	0.359561	1.0757	0.370297	0.736401	1	3424	tags=41%, list=32%, signal=60%
GO_HYDROLASE_ACTIVITY_ACTING_ON_ESTER_BONDS	411	0.198856	1.07412	0.249497	0.739676	1	2880	tags=28%, list=27%, signal=37%
GO_NEGATIVE_REGULATION_OF_I_KAPPAB_KINASE_NF_KAPPAB_SIGNALING	31	0.322016	1.07382	0.352705	0.739723	1	1362	tags=23%, list=13%, signal=26%
GO_BLASTOCYST_DEVELOPMENT	39	0.303731	1.07379	0.357422	0.739086	1	2972	tags=38%, list=27%, signal=53%
GO_CELLULAR_RESPONSE_TO_GLUCOSE_STARVATION	19	0.347726	1.07379	0.362745	0.738386	1	2716	tags=37%, list=25%, signal=49%
GO_PASSIVE_TRANSMEMBRANE_TRANSPORTER_ACTIVITY	251	0.238036	1.07337	0.323829	0.738722	1	2252	tags=26%, list=21%, signal=32%
GO_LYTIC_VACUOLE_MEMBRANE	151	0.27409	1.07333	0.359756	0.738107	1	1590	tags=23%, list=15%, signal=27%
GO_NEGATIVE_REGULATION_OF_CHROMATIN_MODIFICATION	30	0.326703	1.07125	0.368217	0.742723	1	3527	tags=47%, list=33%, signal=69%
GO_REGULATION_OF_CELL_ADHESION_MEDIATED_BY_INTEGRIN	23	0.352221	1.07124	0.354902	0.742036	1	2798	tags=48%, list=26%, signal=64%
GO_CORE_PROMOTER_SEQUENCE_SPECIFIC_DNA_BINDING	67	0.281957	1.07082	0.345309	0.742453	1	3106	tags=39%, list=29%, signal=54%
GO_GOLGI_LUMEN	49	0.330503	1.0705	0.362	0.742581	1	1463	tags=27%, list=14%, signal=31%
GO_POSITIVE_REGULATION_OF_ESTABLISHMENT_OF_PROTEIN_LOCALIZATION	283	0.222556	1.07024	0.323232	0.742557	1	2499	tags=27%, list=23%, signal=34%
GO_MITOTIC_NUCLEAR_DIVISION	211	0.280803	1.07012	0.373585	0.742205	1	3650	tags=42%, list=34%, signal=62%
GO_LIPID_PHOSPHORYLATION	54	0.271099	1.06947	0.345794	0.743132	1	2607	tags=35%, list=24%, signal=46%
GO_REGULATION_OF_MYOTUBE_DIFFERENTIATION	28	0.39437	1.06944	0.376448	0.742496	1	2275	tags=46%, list=21%, signal=59%
GO_GLYCOPROTEIN_METABOLIC_PROCESS	195	0.239258	1.06917	0.334711	0.742472	1	3449	tags=39%, list=32%, signal=56%
GO_DEPHOSPHORYLATION	156	0.222812	1.06893	0.326772	0.742366	1	2455	tags=25%, list=23%, signal=32%
GO_EXECUTION_PHASE_OF_APOPTOSIS	31	0.296412	1.06872	0.347561	0.742152	1	2439	tags=29%, list=23%, signal=37%
GO_REGULATION_OF_DOUBLE_STRAND_BREAK_REPAIR	25	0.329386	1.06842	0.357143	0.742215	1	2663	tags=36%, list=25%, signal=48%
GO_CIRCULATORY_SYSTEM_DEVELOPMENT	460	0.238116	1.06819	0.348748	0.742139	1	2578	tags=29%, list=24%, signal=37%
GO_VESICLE_TARGETING	39	0.296893	1.06816	0.357143	0.741533	1	4029	tags=49%, list=37%, signal=77%
GO_MODIFICATION_OF_MORPHOLOGY_OR_PHYSIOLOGY_OF_OTHER_ORGANISM	54	0.292607	1.0677	0.35167	0.742007	1	3293	tags=43%, list=30%, signal=61%
GO_CYTOPLASMIC_MICROTUBULE	32	0.304979	1.06737	0.354125	0.742141	1	3578	tags=47%, list=33%, signal=70%
GO_RESPONSE_TO_UV	72	0.251642	1.06727	0.357438	0.741708	1	2607	tags=28%, list=24%, signal=36%
GO_REGULATION_OF_CHEMOKINE_PRODUCTION	39	0.308951	1.06685	0.354	0.742065	1	2886	tags=36%, list=27%, signal=49%
GO_CALCIUM_MEDIATED_SIGNALING	58	0.284453	1.06623	0.369439	0.742984	1	3158	tags=38%, list=29%, signal=53%
GO_REGULATION_OF_CELL_CYCLE_PHASE_TRANSITION	202	0.23545	1.06619	0.328273	0.742365	1	3591	tags=40%, list=33%, signal=58%
GO_REGULATION_OF_LYMPHOCYTE_APOPTOTIC_PROCESS	26	0.363581	1.06584	0.37931	0.742548	1	2484	tags=42%, list=23%, signal=55%
GO_MYOFIBRIL_ASSEMBLY	26	0.355037	1.06561	0.36853	0.742417	1	2763	tags=46%, list=26%, signal=62%
GO_CORTICAL_ACTIN_CYTOSKELETON	32	0.301029	1.06528	0.355086	0.742603	1	2172	tags=28%, list=20%, signal=35%
GO_ALDO_KETO_REDUCTASE_NADP_ACTIVITY	17	0.387861	1.065	0.387841	0.742625	1	874	tags=24%, list=8%, signal=26%
GO_HEART_PROCESS	53	0.330968	1.06481	0.363458	0.742438	1	2170	tags=38%, list=20%, signal=47%
GO_PHOSPHORIC_ESTER_HYDROLASE_ACTIVITY	207	0.216618	1.06481	0.322515	0.741764	1	2637	tags=27%, list=24%, signal=35%
GO_RESPONSE_TO_ALCOHOL	225	0.23141	1.06462	0.332677	0.741595	1	1482	tags=19%, list=14%, signal=22%
GO_ENDOSOMAL_PART	225	0.237401	1.06457	0.335953	0.741026	1	2438	tags=28%, list=23%, signal=35%
GO_PROTEIN_AUTOUBIQUITINATION	26	0.326736	1.06441	0.381238	0.740732	1	3040	tags=38%, list=28%, signal=53%
GO_POSITIVE_REGULATION_OF_MONOOXYGENASE_ACTIVITY	19	0.340611	1.06427	0.356994	0.740357	1	2328	tags=42%, list=21%, signal=54%
GO_CHROMOSOME	480	0.246308	1.06423	0.370441	0.739775	1	2793	tags=29%, list=26%, signal=37%
GO_BONE_REMODELING	23	0.341116	1.06389	0.395349	0.739975	1	1030	tags=17%, list=10%, signal=19%
GO_CELLULAR_RESPONSE_TO_ALCOHOL	71	0.267289	1.06388	0.3125	0.739309	1	3164	tags=39%, list=29%, signal=55%
GO_POSITIVE_REGULATION_OF_CALCIUM_ION_TRANSPORT	63	0.29363	1.06383	0.360465	0.738737	1	3158	tags=41%, list=29%, signal=58%
GO_REGULATION_OF_MICROTUBULE_BASED_PROCESS	147	0.260819	1.06255	0.368015	0.741327	1	3786	tags=42%, list=35%, signal=64%
GO_POSITIVE_REGULATION_OF_HORMONE_SECRETION	65	0.275422	1.06214	0.368836	0.74165	1	1423	tags=25%, list=13%, signal=28%
GO_REGULATION_OF_INTRACELLULAR_TRANSPORT	341	0.218611	1.06185	0.330595	0.741667	1	2747	tags=28%, list=25%, signal=37%
GO_CALCIUM_ION_TRANSPORT	127	0.250803	1.06184	0.372277	0.741001	1	1582	tags=20%, list=15%, signal=23%
GO_SOMATIC_STEM_CELL_POPULATION_MAINTENANCE	39	0.307759	1.06166	0.358634	0.740789	1	2501	tags=41%, list=23%, signal=53%
GO_PHOSPHATIDYLINOSITOL_BISPHOSPHATE_BINDING	36	0.303935	1.06135	0.386179	0.740856	1	1478	tags=25%, list=14%, signal=29%
GO_POSITIVE_REGULATION_OF_VASODILATION	20	0.350827	1.06114	0.370902	0.740744	1	2494	tags=50%, list=23%, signal=65%
GO_PEPTIDYL_THREONINE_MODIFICATION	27	0.318575	1.06085	0.374741	0.740824	1	753	tags=15%, list=7%, signal=16%
GO_POSITIVE_REGULATION_OF_RELEASE_OF_SEQUESTERED_CALCIUM_ION_INTO_CYTOSOL	25	0.324315	1.06083	0.369048	0.740226	1	219	tags=12%, list=2%, signal=12%
GO_PROTEIN_COMPLEX_SCAFFOLD	46	0.281402	1.06063	0.37037	0.740012	1	2834	tags=35%, list=26%, signal=47%
GO_FEAR_RESPONSE	16	0.347929	1.05992	0.370809	0.741036	1	890	tags=19%, list=8%, signal=20%
GO_ACTIN_MEDIATED_CELL_CONTRACTION	40	0.355551	1.05981	0.401163	0.74062	1	2763	tags=52%, list=26%, signal=70%
GO_STEROL_TRANSPORT	25	0.338012	1.0594	0.387283	0.74102	1	1553	tags=32%, list=14%, signal=37%
GO_EXCITATORY_POSTSYNAPTIC_POTENTIAL	16	0.365189	1.05929	0.373541	0.740618	1	1447	tags=25%, list=13%, signal=29%
GO_PHOSPHATIDYLINOSITOL_3_KINASE_ACTIVITY	37	0.311837	1.05899	0.366355	0.740651	1	2231	tags=30%, list=21%, signal=37%
GO_CHROMOSOME_SEGREGATION	152	0.297372	1.05784	0.388368	0.743033	1	3600	tags=45%, list=33%, signal=66%
GO_RESPONSE_TO_GONADOTROPIN	16	0.386103	1.05783	0.365234	0.742371	1	1037	tags=19%, list=10%, signal=21%
GO_PHAGOCYTIC_VESICLE	51	0.305556	1.05724	0.364729	0.743159	1	2216	tags=31%, list=20%, signal=39%
GO_CELLULAR_RESPONSE_TO_CALCIUM_ION	25	0.342332	1.0569	0.38477	0.743367	1	2577	tags=32%, list=24%, signal=42%
GO_NEGATIVE_CHEMOTAXIS	21	0.363976	1.05687	0.395349	0.742762	1	2654	tags=43%, list=25%, signal=57%
GO_ARTERY_DEVELOPMENT	36	0.319239	1.05674	0.376673	0.742412	1	508	tags=17%, list=5%, signal=17%
GO_STEREOCILIUM_BUNDLE	23	0.321958	1.05653	0.390342	0.742256	1	1114	tags=22%, list=10%, signal=24%
GO_DEAMINASE_ACTIVITY	19	0.340391	1.05653	0.389344	0.741609	1	2072	tags=32%, list=19%, signal=39%
GO_ACTOMYOSIN_STRUCTURE_ORGANIZATION	43	0.298554	1.05635	0.375746	0.741424	1	3077	tags=47%, list=28%, signal=65%
GO_MATERNAL_PLACENTA_DEVELOPMENT	15	0.358216	1.05587	0.388235	0.741926	1	2340	tags=40%, list=22%, signal=51%
GO_CELL_CELL_JUNCTION	214	0.239065	1.05586	0.353635	0.741285	1	2799	tags=32%, list=26%, signal=43%
GO_KINASE_BINDING	346	0.20649	1.0558	0.318447	0.740807	1	2834	tags=29%, list=26%, signal=38%
GO_PYRIMIDINE_CONTAINING_COMPOUND_METABOLIC_PROCESS	37	0.278516	1.05578	0.34252	0.74018	1	1667	tags=24%, list=15%, signal=29%
GO_RESPONSE_TO_PEPTIDE	240	0.221363	1.05534	0.322	0.740559	1	1373	tags=17%, list=13%, signal=19%
GO_POSITIVE_REGULATION_OF_BLOOD_PRESSURE	22	0.353922	1.05459	0.391051	0.741901	1	2497	tags=36%, list=23%, signal=47%
GO_REGULATION_OF_MUSCLE_CELL_DIFFERENTIATION	93	0.273152	1.05448	0.360947	0.741496	1	2421	tags=31%, list=22%, signal=40%
GO_PROTEIN_DNA_COMPLEX_SUBUNIT_ORGANIZATION	120	0.270223	1.05409	0.370079	0.74183	1	2860	tags=33%, list=26%, signal=44%
GO_PHOTORECEPTOR_INNER_SEGMENT	19	0.357291	1.05387	0.379447	0.741727	1	2791	tags=42%, list=26%, signal=57%
GO_TRANSPORT_VESICLE	173	0.232548	1.05385	0.356164	0.741094	1	2233	tags=24%, list=21%, signal=30%
GO_ALCOHOL_METABOLIC_PROCESS	204	0.247571	1.05373	0.322394	0.740735	1	1386	tags=19%, list=13%, signal=22%
GO_REGULATION_OF_APOPTOTIC_SIGNALING_PATHWAY	201	0.23111	1.05342	0.347023	0.740845	1	2498	tags=27%, list=23%, signal=34%
GO_REGULATION_OF_RESPONSE_TO_DNA_DAMAGE_STIMULUS	88	0.251764	1.05238	0.369781	0.742899	1	2663	tags=28%, list=25%, signal=37%
GO_REGULATION_OF_CELL_CYCLE_ARREST	63	0.268028	1.05176	0.391837	0.743804	1	2482	tags=32%, list=23%, signal=41%
GO_LIGAND_GATED_CHANNEL_ACTIVITY	76	0.270005	1.05165	0.35534	0.743413	1	2252	tags=32%, list=21%, signal=40%
GO_REGULATION_OF_SYSTEM_PROCESS	281	0.235741	1.05122	0.355212	0.743802	1	2593	tags=31%, list=24%, signal=40%
GO_SYNAPTIC_TRANSMISSION_CHOLINERGIC	21	0.338789	1.05054	0.392927	0.744773	1	2236	tags=33%, list=21%, signal=42%
GO_TRANSCRIPTION_FACTOR_ACTIVITY_PROTEIN_BINDING	339	0.213143	1.04943	0.373254	0.746901	1	3495	tags=39%, list=32%, signal=56%
GO_RHO_PROTEIN_SIGNAL_TRANSDUCTION	27	0.330474	1.04937	0.410042	0.746406	1	2382	tags=41%, list=22%, signal=52%
GO_PROTEIN_POLYUBIQUITINATION	141	0.233435	1.04931	0.376726	0.745891	1	3591	tags=40%, list=33%, signal=60%
GO_NEGATIVE_REGULATION_OF_TRANSPORT	236	0.229357	1.04914	0.343454	0.745619	1	2838	tags=31%, list=26%, signal=42%
GO_MORPHOGENESIS_OF_AN_EPITHELIAL_SHEET	19	0.350537	1.04728	0.392079	0.749593	1	2780	tags=47%, list=26%, signal=64%
GO_TRANSFERASE_ACTIVITY_TRANSFERRING_SULFUR_CONTAINING_GROUPS	37	0.307269	1.04709	0.370213	0.749388	1	3178	tags=38%, list=29%, signal=53%
GO_RESPONSE_TO_NITROGEN_COMPOUND	480	0.205778	1.04697	0.356	0.749002	1	2838	tags=29%, list=26%, signal=37%
GO_POSITIVE_REGULATION_OF_REGULATED_SECRETORY_PATHWAY	24	0.322726	1.04554	0.389234	0.751965	1	2733	tags=42%, list=25%, signal=56%
GO_POST_GOLGI_VESICLE_MEDIATED_TRANSPORT	46	0.280686	1.04549	0.385214	0.751415	1	3081	tags=37%, list=28%, signal=51%
GO_N_TERMINAL_PROTEIN_AMINO_ACID_MODIFICATION	17	0.388357	1.04542	0.438597	0.75093	1	1477	tags=24%, list=14%, signal=27%
GO_DIVALENT_INORGANIC_CATION_TRANSPORT	148	0.238174	1.04514	0.371769	0.750919	1	1830	tags=21%, list=17%, signal=25%
GO_GLANDULAR_EPITHELIAL_CELL_DIFFERENTIATION	25	0.339024	1.04423	0.383019	0.752612	1	3073	tags=40%, list=28%, signal=56%
GO_MULTICELLULAR_ORGANISMAL_MOVEMENT	24	0.368318	1.04416	0.42915	0.75213	1	1738	tags=38%, list=16%, signal=45%
GO_GLYCEROLIPID_CATABOLIC_PROCESS	24	0.317639	1.04336	0.414	0.753521	1	3510	tags=38%, list=32%, signal=55%
GO_REGULATION_OF_T_CELL_APOPTOTIC_PROCESS	16	0.417694	1.04265	0.434185	0.754645	1	2955	tags=56%, list=27%, signal=77%
GO_QUATERNARY_AMMONIUM_GROUP_BINDING	22	0.330229	1.04247	0.4	0.754388	1	2236	tags=36%, list=21%, signal=46%
GO_KINASE_ACTIVITY	480	0.202274	1.04215	0.348089	0.754512	1	2231	tags=23%, list=21%, signal=27%
GO_REGULATION_OF_VIRAL_TRANSCRIPTION	26	0.306658	1.04186	0.405242	0.754634	1	2587	tags=35%, list=24%, signal=45%
GO_REGULATION_OF_NIK_NF_KAPPAB_SIGNALING	24	0.318256	1.04166	0.417154	0.754445	1	189	tags=13%, list=2%, signal=13%
GO_LUNG_MORPHOGENESIS	24	0.337974	1.04116	0.397638	0.755026	1	1385	tags=25%, list=13%, signal=29%
GO_NEGATIVE_REGULATION_OF_PROTEIN_KINASE_B_SIGNALING	23	0.313688	1.04107	0.399586	0.75461	1	2472	tags=30%, list=23%, signal=39%
GO_CALCIUM_ION_TRANSMEMBRANE_TRANSPORTER_ACTIVITY	68	0.266692	1.04095	0.39501	0.754251	1	1953	tags=24%, list=18%, signal=29%
GO_METAPHASE_PLATE_CONGRESSION	25	0.342564	1.04061	0.401152	0.754423	1	2416	tags=32%, list=22%, signal=41%
GO_SPINDLE	170	0.253565	1.04055	0.400394	0.753961	1	2387	tags=26%, list=22%, signal=33%
GO_FEEDING_BEHAVIOR	53	0.293003	1.04035	0.366936	0.753748	1	2097	tags=32%, list=19%, signal=40%
GO_REGULATION_OF_ENDOTHELIAL_CELL_MIGRATION	49	0.278765	1.04013	0.389961	0.75365	1	2071	tags=27%, list=19%, signal=33%
GO_MULTICELLULAR_ORGANISMAL_RESPONSE_TO_STRESS	35	0.300223	1.03969	0.405295	0.754087	1	890	tags=17%, list=8%, signal=19%
GO_OLFACTORY_LOBE_DEVELOPMENT	18	0.369009	1.03952	0.408644	0.753913	1	1627	tags=28%, list=15%, signal=33%
GO_REGULATION_OF_TRANSCRIPTION_REGULATORY_REGION_DNA_BINDING	23	0.321619	1.03933	0.402778	0.753728	1	2571	tags=35%, list=24%, signal=46%
GO_VACUOLAR_MEMBRANE	322	0.230153	1.03885	0.378218	0.754266	1	2456	tags=27%, list=23%, signal=34%
GO_RUFFLE_MEMBRANE	49	0.271766	1.03811	0.414538	0.755318	1	2799	tags=37%, list=26%, signal=49%
GO_REGULATION_OF_PROTEIN_UBIQUITINATION_INVOLVED_IN_UBIQUITIN_DEPENDENT_PROTEIN_CATABOLIC_PROCESS	58	0.306373	1.03786	0.411178	0.755281	1	3865	tags=52%, list=36%, signal=80%
GO_STRESS_ACTIVATED_PROTEIN_KINASE_SIGNALING_CASCADE	60	0.267795	1.03765	0.406439	0.755224	1	2366	tags=30%, list=22%, signal=38%
GO_GAMETE_GENERATION	313	0.213564	1.03741	0.351889	0.755151	1	2877	tags=31%, list=27%, signal=41%
GO_COGNITION	141	0.226554	1.0363	0.375746	0.757244	1	2593	tags=29%, list=24%, signal=38%
GO_REGULATION_OF_JNK_CASCADE	102	0.247573	1.03479	0.388235	0.760416	1	1766	tags=24%, list=16%, signal=28%
GO_MUSCLE_CELL_DEVELOPMENT	72	0.282741	1.03465	0.407867	0.760119	1	3527	tags=46%, list=33%, signal=68%
GO_CARBOHYDRATE_HOMEOSTASIS	104	0.241099	1.03383	0.38189	0.76155	1	2851	tags=33%, list=26%, signal=44%
GO_ENDODERM_FORMATION	32	0.315732	1.03364	0.414773	0.761373	1	1925	tags=31%, list=18%, signal=38%
GO_HISTONE_DEMETHYLASE_ACTIVITY	15	0.407627	1.03344	0.424547	0.761215	1	1821	tags=33%, list=17%, signal=40%
GO_RESPONSE_TO_ISOQUINOLINE_ALKALOID	18	0.350393	1.03249	0.415479	0.762955	1	3088	tags=44%, list=29%, signal=62%
GO_DEOXYRIBONUCLEOTIDE_METABOLIC_PROCESS	20	0.338176	1.0323	0.420319	0.762749	1	4422	tags=55%, list=41%, signal=93%
GO_POSITIVE_REGULATION_OF_NIK_NF_KAPPAB_SIGNALING	17	0.344947	1.03163	0.42803	0.763869	1	2213	tags=29%, list=20%, signal=37%
GO_FATTY_ACID_TRANSPORT	37	0.285376	1.03107	0.393281	0.764581	1	2503	tags=32%, list=23%, signal=42%
GO_SENSORY_PERCEPTION_OF_TASTE	28	0.340094	1.03077	0.395699	0.764728	1	702	tags=18%, list=6%, signal=19%
GO_POSITIVE_REGULATION_OF_CHEMOKINE_PRODUCTION	29	0.318656	1.03052	0.410101	0.764711	1	2886	tags=38%, list=27%, signal=52%
GO_POSITIVE_REGULATION_OF_RESPONSE_TO_EXTRACELLULAR_STIMULUS	28	0.299895	1.03047	0.395711	0.764189	1	2503	tags=39%, list=23%, signal=51%
GO_OOGENESIS	36	0.283854	1.03019	0.414873	0.764285	1	2807	tags=36%, list=26%, signal=49%
GO_CELLULAR_RESPONSE_TO_ACID_CHEMICAL	104	0.269023	1.02969	0.422857	0.764892	1	2503	tags=36%, list=23%, signal=46%
GO_MICROTUBULE_CYTOSKELETON_ORGANIZATION	201	0.242419	1.02918	0.398496	0.765461	1	3662	tags=41%, list=34%, signal=60%
GO_ACTIN_BINDING	226	0.229956	1.02888	0.381679	0.76554	1	2365	tags=27%, list=22%, signal=34%
GO_CELLULAR_RESPONSE_TO_UV	36	0.273971	1.02825	0.435644	0.766518	1	3419	tags=42%, list=32%, signal=61%
GO_ACETYLCHOLINE_RECEPTOR_ACTIVITY	20	0.344755	1.02768	0.424901	0.767302	1	2236	tags=35%, list=21%, signal=44%
GO_LIPID_CATABOLIC_PROCESS	151	0.249097	1.02755	0.394175	0.766955	1	1764	tags=21%, list=16%, signal=24%
GO_RESPONSE_TO_AMMONIUM_ION	29	0.295576	1.02731	0.417178	0.766906	1	3069	tags=38%, list=28%, signal=53%
GO_REGULATION_OF_PROTEIN_IMPORT	112	0.23716	1.02709	0.439163	0.766819	1	2612	tags=27%, list=24%, signal=35%
GO_RESPONSE_TO_PROGESTERONE	35	0.333232	1.02705	0.409543	0.766252	1	3293	tags=46%, list=30%, signal=65%
GO_PROTEIN_ACTIVATION_CASCADE	39	0.350617	1.02689	0.441118	0.766056	1	2377	tags=38%, list=22%, signal=49%
GO_NEGATIVE_REGULATION_OF_PROTEIN_COMPLEX_DISASSEMBLY	97	0.26654	1.02687	0.412548	0.765429	1	3705	tags=40%, list=34%, signal=61%
GO_EXOCYTIC_VESICLE	71	0.251487	1.02678	0.392157	0.765038	1	2208	tags=28%, list=20%, signal=35%
GO_ALCOHOL_CATABOLIC_PROCESS	36	0.291968	1.02666	0.420635	0.764682	1	1468	tags=22%, list=14%, signal=26%
GO_CELLULAR_RESPONSE_TO_HYDROGEN_PEROXIDE	38	0.280918	1.02643	0.40873	0.764586	1	3437	tags=39%, list=32%, signal=58%
GO_MICROTUBULE_BASED_PROCESS	293	0.225328	1.0264	0.385047	0.764005	1	3665	tags=41%, list=34%, signal=60%
GO_POLYSACCHARIDE_BINDING	16	0.361826	1.0261	0.406746	0.76416	1	1922	tags=31%, list=18%, signal=38%
GO_POSITIVE_REGULATION_OF_LIPID_BIOSYNTHETIC_PROCESS	31	0.302866	1.02556	0.417969	0.76486	1	2328	tags=39%, list=21%, signal=49%
GO_PANCREAS_DEVELOPMENT	45	0.287262	1.02504	0.422397	0.765496	1	2177	tags=31%, list=20%, signal=39%
GO_REGULATED_EXOCYTOSIS	127	0.251022	1.02504	0.386408	0.764855	1	2632	tags=30%, list=24%, signal=39%
GO_ACETYLCHOLINE_BINDING	15	0.365024	1.02491	0.412698	0.764519	1	2236	tags=40%, list=21%, signal=50%
GO_CELLULAR_RESPONSE_TO_DSRNA	21	0.315072	1.02477	0.423762	0.764208	1	2834	tags=43%, list=26%, signal=58%
GO_ASSOCIATIVE_LEARNING	41	0.27131	1.0245	0.412916	0.764178	1	923	tags=20%, list=9%, signal=21%
GO_NEURAL_CREST_CELL_MIGRATION	31	0.306333	1.02425	0.419483	0.764191	1	3348	tags=42%, list=31%, signal=61%
GO_REGULATION_OF_MUSCLE_CELL_APOPTOTIC_PROCESS	28	0.301012	1.02371	0.393822	0.764868	1	2967	tags=39%, list=27%, signal=54%
GO_TRANSCRIPTION_COACTIVATOR_ACTIVITY	184	0.224491	1.02324	0.424051	0.765391	1	3495	tags=43%, list=32%, signal=62%
GO_NEUTRAL_LIPID_CATABOLIC_PROCESS	15	0.362907	1.02308	0.412008	0.765124	1	1507	tags=20%, list=14%, signal=23%
GO_NEURON_MIGRATION	60	0.264133	1.02277	0.414226	0.765317	1	2104	tags=27%, list=19%, signal=33%
GO_PROTEIN_KINASE_A_BINDING	25	0.298776	1.02259	0.418	0.765122	1	1114	tags=20%, list=10%, signal=22%
GO_AORTA_DEVELOPMENT	19	0.360223	1.02235	0.434077	0.765056	1	508	tags=21%, list=5%, signal=22%
GO_REGULATION_OF_SYMBIOSIS_ENCOMPASSING_MUTUALISM_THROUGH_PARASITISM	98	0.251147	1.02223	0.409836	0.764696	1	1830	tags=20%, list=17%, signal=24%
GO_NEGATIVE_REGULATION_OF_OSSIFICATION	36	0.310625	1.02209	0.405039	0.764425	1	1939	tags=31%, list=18%, signal=37%
GO_REGULATION_OF_INTRINSIC_APOPTOTIC_SIGNALING_PATHWAY	82	0.253357	1.0214	0.404858	0.765451	1	2886	tags=34%, list=27%, signal=46%
GO_RECEPTOR_SIGNALING_PROTEIN_ACTIVITY	97	0.242215	1.02138	0.397661	0.764857	1	2374	tags=27%, list=22%, signal=34%
GO_TRANSITION_METAL_ION_TRANSMEMBRANE_TRANSPORTER_ACTIVITY	25	0.304721	1.02125	0.417178	0.764563	1	3075	tags=44%, list=28%, signal=61%
GO_POSITIVE_REGULATION_OF_INTRACELLULAR_TRANSPORT	210	0.21526	1.02084	0.417695	0.765003	1	2499	tags=26%, list=23%, signal=33%
GO_LUNG_EPITHELIUM_DEVELOPMENT	25	0.3303	1.02002	0.442913	0.766426	1	1622	tags=32%, list=15%, signal=38%
GO_CHANNEL_REGULATOR_ACTIVITY	79	0.248199	1.01943	0.404624	0.767363	1	1378	tags=18%, list=13%, signal=20%
GO_GTPASE_ACTIVITY	145	0.218681	1.01818	0.408367	0.769895	1	2686	tags=27%, list=25%, signal=35%
GO_TRANSCRIPTIONAL_ACTIVATOR_ACTIVITY_RNA_POLYMERASE_II_CORE_PROMOTER_PROXIMAL_REGION_SEQUENCE_SPECIFIC_BINDING	137	0.243223	1.0179	0.421359	0.769965	1	2275	tags=27%, list=21%, signal=34%
GO_POSITIVE_REGULATION_OF_MUSCLE_CELL_DIFFERENTIATION	59	0.282425	1.01679	0.441233	0.772101	1	2387	tags=31%, list=22%, signal=39%
GO_CLATHRIN_MEDIATED_ENDOCYTOSIS	20	0.31512	1.01654	0.451737	0.772088	1	2786	tags=45%, list=26%, signal=60%
GO_MATURATION_OF_5_8S_RRNA	17	0.377027	1.0164	0.431579	0.771802	1	4263	tags=47%, list=39%, signal=77%
GO_GLAND_DEVELOPMENT	220	0.221707	1.0164	0.412229	0.771196	1	2554	tags=26%, list=24%, signal=34%
GO_SEX_CHROMOSOME	18	0.337614	1.01573	0.422222	0.772214	1	3465	tags=44%, list=32%, signal=65%
GO_OLIGODENDROCYTE_DEVELOPMENT	19	0.3356	1.01521	0.441634	0.772823	1	2571	tags=37%, list=24%, signal=48%
GO_NEGATIVE_REGULATION_OF_ACTIN_FILAMENT_DEPOLYMERIZATION	21	0.325485	1.01512	0.432749	0.772419	1	1336	tags=24%, list=12%, signal=27%
GO_NEGATIVE_REGULATION_OF_POTASSIUM_ION_TRANSPORT	15	0.367945	1.01465	0.434286	0.772933	1	1378	tags=33%, list=13%, signal=38%
GO_RESPONSE_TO_DRUG	251	0.208896	1.0144	0.412121	0.772931	1	2909	tags=33%, list=27%, signal=44%
GO_RESPONSE_TO_VITAMIN_A	15	0.357164	1.01408	0.454361	0.773104	1	3293	tags=60%, list=30%, signal=86%
GO_GOLGI_ASSOCIATED_VESICLE	48	0.269221	1.01384	0.430672	0.773067	1	3006	tags=27%, list=28%, signal=37%
GO_REGULATION_OF_PROTEIN_COMPLEX_DISASSEMBLY	123	0.246559	1.01374	0.42243	0.772688	1	3705	tags=40%, list=34%, signal=60%
GO_REGULATION_OF_MICROTUBULE_POLYMERIZATION_OR_DEPOLYMERIZATION	102	0.262877	1.01345	0.427466	0.772789	1	3705	tags=41%, list=34%, signal=62%
GO_MONOCARBOXYLIC_ACID_TRANSPORT	72	0.256976	1.01336	0.433198	0.772376	1	1381	tags=22%, list=13%, signal=25%
GO_STRIATED_MUSCLE_CONTRACTION	56	0.318007	1.01309	0.449102	0.772387	1	1888	tags=34%, list=17%, signal=41%
GO_NEGATIVE_REGULATION_OF_CELL_PROLIFERATION	361	0.208699	1.01309	0.414258	0.771763	1	2349	tags=26%, list=22%, signal=32%
GO_NEGATIVE_REGULATION_OF_ERK1_AND_ERK2_CASCADE	30	0.290654	1.01241	0.431412	0.772746	1	1362	tags=23%, list=13%, signal=27%
GO_SINGLE_ORGANISM_MEMBRANE_BUDDING	38	0.282237	1.01235	0.452138	0.772251	1	3703	tags=45%, list=34%, signal=68%
GO_REGULATION_OF_ACTIN_FILAMENT_DEPOLYMERIZATION	28	0.314259	1.01211	0.445328	0.772244	1	2583	tags=32%, list=24%, signal=42%
GO_PROTEIN_DEPHOSPHORYLATION	110	0.225193	1.0104	0.445098	0.775808	1	2455	tags=25%, list=23%, signal=31%
GO_INNATE_IMMUNE_RESPONSE_ACTIVATING_CELL_SURFACE_RECEPTOR_SIGNALING_PATHWAY	67	0.293082	1.01016	0.440476	0.775743	1	3865	tags=46%, list=36%, signal=72%
GO_MULTI_ORGANISM_REPRODUCTIVE_PROCESS	484	0.198219	1.00982	0.415663	0.775995	1	2877	tags=31%, list=27%, signal=40%
GO_VASCULAR_ENDOTHELIAL_GROWTH_FACTOR_RECEPTOR_SIGNALING_PATHWAY	45	0.30512	1.00948	0.447876	0.776228	1	3463	tags=49%, list=32%, signal=72%
GO_INSULIN_SECRETION	23	0.321869	1.00936	0.440816	0.775893	1	2838	tags=48%, list=26%, signal=65%
GO_POSITIVE_REGULATION_OF_NERVOUS_SYSTEM_DEVELOPMENT	221	0.222419	1.00836	0.401961	0.777742	1	2858	tags=31%, list=26%, signal=41%
GO_MACROMITOPHAGY	80	0.230964	1.00794	0.417031	0.778134	1	3399	tags=35%, list=31%, signal=51%
GO_MODULATION_BY_VIRUS_OF_HOST_MORPHOLOGY_OR_PHYSIOLOGY	20	0.332271	1.00772	0.45155	0.778074	1	3682	tags=50%, list=34%, signal=76%
GO_NEGATIVE_REGULATION_OF_PROTEIN_MODIFICATION_BY_SMALL_PROTEIN_CONJUGATION_OR_REMOVAL	90	0.259187	1.00751	0.426829	0.777979	1	3895	tags=44%, list=36%, signal=69%
GO_NEGATIVE_REGULATION_OF_NEURON_DIFFERENTIATION	117	0.246351	1.00734	0.422619	0.777761	1	2381	tags=28%, list=22%, signal=36%
GO_THIOESTER_BIOSYNTHETIC_PROCESS	20	0.354215	1.00717	0.463115	0.777579	1	1465	tags=25%, list=14%, signal=29%
GO_DNA_ALKYLATION	29	0.316777	1.00682	0.437882	0.777777	1	1251	tags=24%, list=12%, signal=27%
GO_MAINTENANCE_OF_CELL_NUMBER	80	0.265229	1.00634	0.434951	0.778358	1	3679	tags=48%, list=34%, signal=71%
GO_REGULATION_OF_MUSCLE_ADAPTATION	42	0.286652	1.00633	0.449597	0.777746	1	2275	tags=29%, list=21%, signal=36%
GO_SKELETAL_MUSCLE_TISSUE_REGENERATION	16	0.366979	1.00605	0.42607	0.777796	1	2275	tags=38%, list=21%, signal=47%
GO_METALLOENDOPEPTIDASE_ACTIVITY	60	0.263701	1.0044	0.445312	0.78122	1	2534	tags=30%, list=23%, signal=39%
GO_REGULATION_OF_NUCLEOCYTOPLASMIC_TRANSPORT	132	0.223332	1.00382	0.445507	0.782044	1	2612	tags=26%, list=24%, signal=34%
GO_EUCHROMATIN	16	0.347946	1.00372	0.459514	0.781673	1	1552	tags=25%, list=14%, signal=29%
GO_RNA_POLYMERASE_II_TRANSCRIPTION_FACTOR_ACTIVITY_SEQUENCE_SPECIFIC_DNA_BINDING	376	0.218875	1.00319	0.43301	0.782373	1	2587	tags=27%, list=24%, signal=35%
GO_CHROMOSOMAL_REGION	170	0.270773	1.00271	0.430255	0.782853	1	2768	tags=30%, list=26%, signal=40%
GO_SEXUAL_REPRODUCTION	392	0.201387	1.00243	0.426587	0.782928	1	2877	tags=31%, list=27%, signal=40%
GO_RHYTHMIC_PROCESS	175	0.220408	1.0023	0.415709	0.782609	1	2735	tags=28%, list=25%, signal=37%
GO_POSITIVE_REGULATION_OF_NEURON_DIFFERENTIATION	158	0.225422	1.0021	0.431373	0.782451	1	2858	tags=30%, list=26%, signal=41%
GO_LATE_ENDOSOME	114	0.235816	1.00146	0.431452	0.783411	1	2757	tags=29%, list=25%, signal=38%
GO_NUCLEOBASE_CONTAINING_COMPOUND_KINASE_ACTIVITY	30	0.271357	1.00137	0.463074	0.782985	1	1061	tags=20%, list=10%, signal=22%
GO_NEGATIVE_REGULATION_OF_MITOTIC_NUCLEAR_DIVISION	25	0.313553	1.00109	0.447217	0.783046	1	2982	tags=28%, list=28%, signal=39%
GO_REGULATION_OF_PROTEIN_LOCALIZATION_TO_NUCLEUS	134	0.225032	1.0008	0.468687	0.78317	1	2612	tags=27%, list=24%, signal=35%
GO_NEGATIVE_REGULATION_OF_CELL_DIFFERENTIATION	352	0.217413	1.00057	0.432692	0.783117	1	2388	tags=26%, list=22%, signal=32%
GO_RENAL_SYSTEM_PROCESS	59	0.282206	1.00053	0.462777	0.78259	1	3273	tags=42%, list=30%, signal=60%
GO_CONTRACTILE_FIBER	125	0.258308	1.00026	0.443182	0.782642	1	2326	tags=29%, list=21%, signal=36%
GO_LAMININ_BINDING	16	0.380647	1.00021	0.438114	0.782172	1	2649	tags=44%, list=24%, signal=58%
GO_NEGATIVE_REGULATION_OF_SMOOTHENED_SIGNALING_PATHWAY	18	0.326943	0.999948	0.452191	0.782188	1	1425	tags=22%, list=13%, signal=26%
GO_REGULATION_OF_CHROMATIN_ORGANIZATION	96	0.244398	0.999778	0.430584	0.781953	1	2530	tags=27%, list=23%, signal=35%
GO_AMINO_ACID_BINDING	56	0.258882	0.999639	0.463768	0.781664	1	2525	tags=30%, list=23%, signal=39%
GO_PHOTOTRANSDUCTION	19	0.322338	0.999508	0.433925	0.781365	1	4063	tags=68%, list=38%, signal=109%
GO_SPERM_PART	70	0.244249	0.999473	0.442125	0.780829	1	2098	tags=24%, list=19%, signal=30%
GO_NEGATIVE_REGULATION_OF_CELL_DIVISION	44	0.272673	0.999383	0.42885	0.780431	1	1999	tags=20%, list=18%, signal=25%
GO_ORGANELLE_LOCALIZATION	224	0.20981	0.999269	0.462168	0.780105	1	3111	tags=32%, list=29%, signal=44%
GO_ERBB2_SIGNALING_PATHWAY	22	0.319768	0.99924	0.450704	0.779562	1	2607	tags=32%, list=24%, signal=42%
GO_MONOVALENT_INORGANIC_CATION_HOMEOSTASIS	66	0.262121	0.998951	0.418327	0.779675	1	1634	tags=23%, list=15%, signal=27%
GO_CHROMOSOME_LOCALIZATION	36	0.300975	0.998881	0.455056	0.779229	1	3503	tags=44%, list=32%, signal=65%
GO_RESPONSE_TO_TEMPERATURE_STIMULUS	96	0.230506	0.998805	0.458333	0.778798	1	2328	tags=24%, list=21%, signal=30%
GO_SARCOMERE_ORGANIZATION	16	0.344807	0.998479	0.453799	0.778975	1	2583	tags=44%, list=24%, signal=57%
GO_REGULATION_OF_HISTONE_H3_K4_METHYLATION	17	0.353114	0.998442	0.436759	0.778461	1	1641	tags=24%, list=15%, signal=28%
GO_POSITIVE_REGULATION_OF_DEVELOPMENTAL_GROWTH	88	0.234779	0.998322	0.452381	0.778152	1	3539	tags=41%, list=33%, signal=60%
GO_FC_EPSILON_RECEPTOR_SIGNALING_PATHWAY	79	0.265669	0.99712	0.454545	0.780493	1	2819	tags=30%, list=26%, signal=41%
GO_REGULATION_OF_SYSTEMIC_ARTERIAL_BLOOD_PRESSURE_BY_RENIN_ANGIOTENSIN	16	0.362145	0.997096	0.453815	0.779941	1	1074	tags=25%, list=10%, signal=28%
GO_NUCLEAR_CHROMOSOME	289	0.229477	0.996697	0.436759	0.780327	1	3665	tags=39%, list=34%, signal=58%
GO_NUCLEAR_CHROMOSOME_TELOMERIC_REGION	68	0.274288	0.996673	0.47619	0.77978	1	4111	tags=46%, list=38%, signal=73%
GO_STRIATED_MUSCLE_CELL_DIFFERENTIATION	108	0.247465	0.99663	0.462151	0.779288	1	2651	tags=29%, list=24%, signal=38%
GO_ACYLGLYCEROL_HOMEOSTASIS	16	0.359032	0.995619	0.465726	0.781192	1	1853	tags=31%, list=17%, signal=38%
GO_ORGANOPHOSPHATE_CATABOLIC_PROCESS	69	0.245514	0.994789	0.452381	0.782619	1	3656	tags=39%, list=34%, signal=59%
GO_VASODILATION	16	0.348172	0.994575	0.442387	0.782522	1	1756	tags=25%, list=16%, signal=30%
GO_ANTIGEN_PROCESSING_AND_PRESENTATION_OF_EXOGENOUS_PEPTIDE_ANTIGEN_VIA_MHC_CLASS_I	39	0.355927	0.994425	0.478261	0.782289	1	3865	tags=54%, list=36%, signal=83%
GO_REGULATION_OF_PROTEIN_COMPLEX_ASSEMBLY	195	0.202544	0.994225	0.486653	0.782188	1	2945	tags=29%, list=27%, signal=39%
GO_EPITHELIAL_TO_MESENCHYMAL_TRANSITION	38	0.289909	0.994223	0.460784	0.781588	1	1818	tags=26%, list=17%, signal=32%
GO_NEGATIVE_REGULATION_OF_INFLAMMATORY_RESPONSE	48	0.290064	0.993916	0.473896	0.781737	1	1155	tags=21%, list=11%, signal=23%
GO_RESPONSE_TO_CORTICOSTEROID	105	0.241033	0.993916	0.451485	0.781133	1	3159	tags=36%, list=29%, signal=51%
GO_MOLTING_CYCLE	45	0.340499	0.993822	0.460526	0.780743	1	1888	tags=38%, list=17%, signal=46%
GO_SIGNAL_RELEASE	87	0.23651	0.992677	0.440252	0.782891	1	2838	tags=34%, list=26%, signal=46%
GO_SPINDLE_MICROTUBULE	37	0.306211	0.992381	0.440075	0.78304	1	1605	tags=19%, list=15%, signal=22%
GO_NEGATIVE_REGULATION_OF_MULTI_ORGANISM_PROCESS	82	0.256444	0.991379	0.424901	0.784894	1	1830	tags=23%, list=17%, signal=28%
GO_NEGATIVE_REGULATION_OF_BLOOD_CIRCULATION	17	0.340628	0.990679	0.464015	0.785992	1	3135	tags=47%, list=29%, signal=66%
GO_ACTIN_CYTOSKELETON	260	0.208672	0.989494	0.448669	0.788274	1	2786	tags=30%, list=26%, signal=39%
GO_METAL_ION_TRANSPORT	322	0.2044	0.989174	0.454902	0.78847	1	2252	tags=23%, list=21%, signal=28%
GO_ER_NUCLEUS_SIGNALING_PATHWAY	24	0.331971	0.988982	0.456612	0.788314	1	3321	tags=38%, list=31%, signal=54%
GO_MESENCHYMAL_CELL_DIFFERENTIATION	85	0.252168	0.98823	0.45155	0.789533	1	1627	tags=22%, list=15%, signal=26%
GO_DNA_CONFORMATION_CHANGE	134	0.255261	0.986397	0.463654	0.793517	1	3176	tags=36%, list=29%, signal=50%
GO_PHOSPHATIDIC_ACID_METABOLIC_PROCESS	20	0.303081	0.986386	0.465483	0.792924	1	306	tags=15%, list=3%, signal=15%
GO_PRE_AUTOPHAGOSOMAL_STRUCTURE	21	0.304853	0.986297	0.463415	0.792544	1	2215	tags=29%, list=20%, signal=36%
GO_REGULATION_OF_MYELINATION	18	0.311667	0.986008	0.490234	0.792628	1	1588	tags=22%, list=15%, signal=26%
GO_REGULATION_OF_MEGAKARYOCYTE_DIFFERENTIATION	15	0.367197	0.985626	0.489837	0.792906	1	4033	tags=53%, list=37%, signal=85%
GO_REGULATION_OF_LIPID_CATABOLIC_PROCESS	27	0.305453	0.985239	0.504016	0.793269	1	2328	tags=33%, list=21%, signal=42%
GO_POSITIVE_REGULATION_OF_NUCLEOTIDE_METABOLIC_PROCESS	75	0.25144	0.985186	0.483301	0.792794	1	2590	tags=31%, list=24%, signal=40%
GO_NEGATIVE_REGULATION_OF_LOCOMOTION	137	0.236028	0.985044	0.472332	0.792558	1	1895	tags=23%, list=18%, signal=28%
GO_SECRETORY_VESICLE	248	0.221257	0.984573	0.477273	0.793069	1	2340	tags=27%, list=22%, signal=34%
GO_NEGATIVE_REGULATION_OF_SEQUENCE_SPECIFIC_DNA_BINDING_TRANSCRIPTION_FACTOR_ACTIVITY	71	0.239814	0.984058	0.45229	0.793745	1	1777	tags=21%, list=16%, signal=25%
GO_STEROID_METABOLIC_PROCESS	135	0.253526	0.983577	0.468379	0.794253	1	2503	tags=29%, list=23%, signal=37%
GO_GLUCOSE_CATABOLIC_PROCESS	18	0.36219	0.983195	0.485417	0.794555	1	3777	tags=67%, list=35%, signal=102%
GO_SYNAPTIC_VESICLE_CYCLE	47	0.265636	0.983153	0.45749	0.794056	1	2884	tags=38%, list=27%, signal=52%
GO_DIVALENT_INORGANIC_CATION_TRANSMEMBRANE_TRANSPORTER_ACTIVITY	92	0.238347	0.982434	0.484787	0.795163	1	1582	tags=20%, list=15%, signal=23%
GO_GLIOGENESIS	105	0.240155	0.98225	0.458753	0.795033	1	2228	tags=27%, list=21%, signal=33%
GO_CELL_FATE_COMMITMENT	137	0.245995	0.981396	0.491525	0.796532	1	1641	tags=23%, list=15%, signal=27%
GO_RNA_PHOSPHODIESTER_BOND_HYDROLYSIS_EXONUCLEOLYTIC	20	0.316924	0.981262	0.485597	0.796263	1	2855	tags=35%, list=26%, signal=47%
GO_GENE_SILENCING_BY_RNA	78	0.264306	0.980987	0.466119	0.796331	1	3271	tags=40%, list=30%, signal=57%
GO_CELLULAR_PROCESS_INVOLVED_IN_REPRODUCTION_IN_MULTICELLULAR_ORGANISM	135	0.217868	0.980145	0.479691	0.797788	1	2841	tags=30%, list=26%, signal=40%
GO_ORGANIC_HYDROXY_COMPOUND_METABOLIC_PROCESS	278	0.221694	0.979934	0.471264	0.797668	1	1494	tags=18%, list=14%, signal=20%
GO_REGULATION_OF_SYNAPTIC_PLASTICITY	76	0.245233	0.979915	0.46507	0.797111	1	2769	tags=33%, list=26%, signal=44%
GO_RHO_GUANYL_NUCLEOTIDE_EXCHANGE_FACTOR_ACTIVITY	45	0.278265	0.979888	0.5	0.796591	1	2813	tags=38%, list=26%, signal=51%
GO_REGULATION_OF_RYANODINE_SENSITIVE_CALCIUM_RELEASE_CHANNEL_ACTIVITY	16	0.336485	0.979829	0.467308	0.796156	1	909	tags=19%, list=8%, signal=20%
GO_HORMONE_RECEPTOR_BINDING	98	0.226508	0.979762	0.464358	0.795697	1	1373	tags=16%, list=13%, signal=19%
GO_METAL_ION_TRANSMEMBRANE_TRANSPORTER_ACTIVITY	223	0.215581	0.979393	0.488372	0.795972	1	2252	tags=24%, list=21%, signal=29%
GO_POSITIVE_REGULATION_OF_CYCLIC_NUCLEOTIDE_METABOLIC_PROCESS	62	0.259339	0.978712	0.480469	0.797055	1	1904	tags=26%, list=18%, signal=31%
GO_LIPID_TRANSPORTER_ACTIVITY	60	0.260393	0.978298	0.495885	0.797438	1	3363	tags=38%, list=31%, signal=55%
GO_I_BAND	75	0.26012	0.978272	0.482759	0.796885	1	2651	tags=31%, list=24%, signal=40%
GO_GLUCOSE_6_PHOSPHATE_METABOLIC_PROCESS	16	0.345851	0.978217	0.474542	0.796425	1	2671	tags=31%, list=25%, signal=41%
GO_POSITIVE_REGULATION_OF_CELL_MORPHOGENESIS_INVOLVED_IN_DIFFERENTIATION	90	0.23442	0.977952	0.478346	0.796454	1	1514	tags=20%, list=14%, signal=23%
GO_NEGATIVE_REGULATION_OF_CALCIUM_ION_TRANSMEMBRANE_TRANSPORT	17	0.332522	0.977538	0.477756	0.796871	1	73	tags=12%, list=1%, signal=12%
GO_VESICLE_COATING	38	0.263218	0.977086	0.473373	0.797349	1	3703	tags=39%, list=34%, signal=60%
GO_REGULATION_OF_THYMOCYTE_AGGREGATION	18	0.366309	0.976973	0.495108	0.796998	1	2328	tags=39%, list=21%, signal=49%
GO_BODY_FLUID_SECRETION	36	0.289663	0.976834	0.50478	0.796735	1	2186	tags=31%, list=20%, signal=38%
GO_POSITIVE_REGULATION_OF_PROTEIN_ACETYLATION	24	0.293194	0.976645	0.507216	0.796627	1	749	tags=17%, list=7%, signal=18%
GO_POSITIVE_REGULATION_OF_PEPTIDE_SECRETION	50	0.267762	0.976063	0.49031	0.797411	1	2177	tags=34%, list=20%, signal=42%
GO_HISTONE_EXCHANGE	27	0.335018	0.975839	0.489152	0.797309	1	2803	tags=37%, list=26%, signal=50%
GO_REGULATION_OF_CELL_CYCLE_G2_M_PHASE_TRANSITION	36	0.282415	0.975773	0.488462	0.796908	1	2375	tags=36%, list=22%, signal=46%
GO_MULTI_MULTICELLULAR_ORGANISM_PROCESS	122	0.230521	0.97544	0.479924	0.797075	1	2553	tags=32%, list=24%, signal=41%
GO_NUCLEAR_NUCLEOSOME	19	0.384196	0.975133	0.490079	0.79722	1	1768	tags=32%, list=16%, signal=38%
GO_RECEPTOR_MEDIATED_ENDOCYTOSIS	115	0.249409	0.974918	0.482828	0.797184	1	3390	tags=40%, list=31%, signal=58%
GO_FATTY_ACID_BINDING	16	0.346117	0.97417	0.481876	0.798394	1	2083	tags=31%, list=19%, signal=39%
GO_MICROBODY_PART	50	0.265838	0.974135	0.481633	0.797883	1	2152	tags=22%, list=20%, signal=27%
GO_DEMETHYLATION	31	0.308142	0.973987	0.47541	0.797645	1	1821	tags=26%, list=17%, signal=31%
GO_ORGANELLE_DISASSEMBLY	114	0.209969	0.973851	0.489177	0.797369	1	3399	tags=37%, list=31%, signal=53%
GO_ANDROGEN_RECEPTOR_BINDING	20	0.314767	0.973732	0.49896	0.797056	1	2162	tags=30%, list=20%, signal=37%
GO_ADHERENS_JUNCTION_ORGANIZATION	43	0.27006	0.973661	0.489066	0.796624	1	2548	tags=35%, list=24%, signal=45%
GO_RESPIRATORY_SYSTEM_DEVELOPMENT	111	0.246605	0.9731	0.483685	0.797455	1	1482	tags=21%, list=14%, signal=24%
GO_PEPTIDE_HORMONE_PROCESSING	16	0.355804	0.97282	0.473577	0.797543	1	1074	tags=31%, list=10%, signal=35%
GO_SIGNALING_ADAPTOR_ACTIVITY	34	0.272439	0.972563	0.473384	0.797576	1	2813	tags=47%, list=26%, signal=63%
GO_PHAGOCYTIC_VESICLE_MEMBRANE	35	0.295671	0.97248	0.470588	0.79717	1	2215	tags=29%, list=20%, signal=36%
GO_OXIDOREDUCTASE_ACTIVITY_ACTING_ON_A_SULFUR_GROUP_OF_DONORS	28	0.292557	0.97201	0.516064	0.797694	1	1699	tags=21%, list=16%, signal=25%
GO_MICROVILLUS	40	0.275556	0.970606	0.485207	0.800579	1	2870	tags=30%, list=27%, signal=41%
GO_AMIDE_TRANSPORT	49	0.254744	0.970583	0.508265	0.800054	1	3437	tags=45%, list=32%, signal=65%
GO_PHOTORECEPTOR_CELL_MAINTENANCE	15	0.328694	0.970117	0.501039	0.800586	1	3781	tags=60%, list=35%, signal=92%
GO_TRANSCRIPTION_COREPRESSOR_ACTIVITY	120	0.222753	0.970095	0.497076	0.800052	1	2264	tags=28%, list=21%, signal=34%
GO_POSITIVE_REGULATION_OF_CALCIUM_ION_TRANSPORT_INTO_CYTOSOL	33	0.290824	0.969336	0.509728	0.801235	1	3158	tags=39%, list=29%, signal=55%
GO_REGULATION_OF_CELL_PROJECTION_ORGANIZATION	312	0.205308	0.968024	0.514056	0.803816	1	2881	tags=30%, list=27%, signal=39%
GO_NEGATIVE_REGULATION_OF_PHOSPHORUS_METABOLIC_PROCESS	321	0.193557	0.967906	0.528046	0.803493	1	2472	tags=25%, list=23%, signal=31%
GO_GOLGI_TO_VACUOLE_TRANSPORT	16	0.344368	0.967573	0.483748	0.803705	1	2556	tags=38%, list=24%, signal=49%
GO_GLYCEROLIPID_METABOLIC_PROCESS	209	0.205769	0.966976	0.527344	0.80456	1	1887	tags=20%, list=17%, signal=24%
GO_GATED_CHANNEL_ACTIVITY	176	0.228204	0.966479	0.506048	0.805194	1	2252	tags=26%, list=21%, signal=32%
GO_MITOTIC_CELL_CYCLE	448	0.232945	0.966309	0.452651	0.804993	1	3650	tags=38%, list=34%, signal=55%
GO_ENZYME_ACTIVATOR_ACTIVITY	268	0.199744	0.966287	0.518664	0.804445	1	2252	tags=21%, list=21%, signal=26%
GO_CYTOPLASMIC_REGION	157	0.210728	0.966059	0.523077	0.804393	1	2347	tags=24%, list=22%, signal=30%
GO_NEURON_RECOGNITION	21	0.327253	0.96595	0.506048	0.804053	1	474	tags=19%, list=4%, signal=20%
GO_MEMBRANE_DISASSEMBLY	26	0.315865	0.965606	0.479208	0.804277	1	3849	tags=46%, list=36%, signal=71%
GO_REGULATION_OF_ANION_TRANSPORT	79	0.233603	0.965564	0.517034	0.803787	1	2593	tags=34%, list=24%, signal=45%
GO_NEGATIVE_REGULATION_OF_ESTABLISHMENT_OF_PROTEIN_LOCALIZATION	110	0.228109	0.96539	0.485549	0.803616	1	788	tags=14%, list=7%, signal=15%
GO_NEGATIVE_REGULATION_OF_CELLULAR_COMPONENT_ORGANIZATION	401	0.194295	0.964972	0.472112	0.803998	1	3619	tags=36%, list=33%, signal=52%
GO_AUTONOMIC_NERVOUS_SYSTEM_DEVELOPMENT	19	0.329011	0.964719	0.483936	0.804022	1	920	tags=21%, list=8%, signal=23%
GO_REGULATION_OF_SMALL_GTPASE_MEDIATED_SIGNAL_TRANSDUCTION	160	0.225276	0.964589	0.522417	0.803736	1	2813	tags=31%, list=26%, signal=41%
GO_PROTEIN_HOMOTETRAMERIZATION	42	0.261511	0.964326	0.485656	0.803751	1	2361	tags=26%, list=22%, signal=33%
GO_RESPONSE_TO_OXIDATIVE_STRESS	218	0.207836	0.963688	0.5	0.804652	1	2567	tags=26%, list=24%, signal=34%
GO_BROWN_FAT_CELL_DIFFERENTIATION	20	0.328591	0.962988	0.50499	0.805727	1	2501	tags=40%, list=23%, signal=52%
GO_VASOCONSTRICTION	16	0.349879	0.962924	0.497196	0.805309	1	3487	tags=50%, list=32%, signal=74%
GO_NF_KAPPAB_BINDING	20	0.31333	0.962865	0.485537	0.80486	1	461	tags=15%, list=4%, signal=16%
GO_PROTEIN_DESTABILIZATION	22	0.291702	0.96271	0.529774	0.804656	1	1421	tags=23%, list=13%, signal=26%
GO_REGULATION_OF_LIGASE_ACTIVITY	76	0.262985	0.962646	0.494071	0.804239	1	3865	tags=45%, list=36%, signal=69%
GO_REGULATION_OF_CYTOPLASMIC_TRANSPORT	273	0.199177	0.962594	0.509165	0.803792	1	2612	tags=26%, list=24%, signal=33%
GO_GLIAL_CELL_DIFFERENTIATION	80	0.237804	0.962466	0.481482	0.803499	1	2349	tags=26%, list=22%, signal=33%
GO_ENTRAINMENT_OF_CIRCADIAN_CLOCK	16	0.330639	0.962379	0.508806	0.803152	1	3219	tags=38%, list=30%, signal=53%
GO_EXOCYTOSIS	170	0.218914	0.962153	0.516699	0.803114	1	2657	tags=28%, list=25%, signal=37%
GO_PROTEIN_K11_LINKED_UBIQUITINATION	16	0.32534	0.961911	0.502008	0.803082	1	3322	tags=56%, list=31%, signal=81%
GO_RESPONSE_TO_COCAINE	29	0.292488	0.961667	0.517312	0.803106	1	2838	tags=41%, list=26%, signal=56%
GO_MONOCARBOXYLIC_ACID_METABOLIC_PROCESS	263	0.219459	0.961546	0.475806	0.80283	1	2516	tags=27%, list=23%, signal=34%
GO_QUINONE_METABOLIC_PROCESS	16	0.357889	0.961478	0.48583	0.802403	1	1494	tags=25%, list=14%, signal=29%
GO_REGULATION_OF_MUSCLE_SYSTEM_PROCESS	116	0.238445	0.961427	0.502857	0.801935	1	2569	tags=30%, list=24%, signal=39%
GO_MEMBRANE_BUDDING	57	0.244006	0.960827	0.495885	0.802798	1	3081	tags=32%, list=28%, signal=44%
GO_POSITIVE_REGULATION_OF_DNA_METABOLIC_PROCESS	106	0.226529	0.960811	0.502959	0.802264	1	2606	tags=25%, list=24%, signal=33%
GO_CARBOHYDRATE_DERIVATIVE_TRANSPORT	31	0.287182	0.960595	0.493952	0.802152	1	2837	tags=32%, list=26%, signal=44%
GO_RESPONSE_TO_EXOGENOUS_DSRNA	19	0.329412	0.960075	0.514507	0.80281	1	2834	tags=42%, list=26%, signal=57%
GO_INTRACELLULAR_STEROID_HORMONE_RECEPTOR_SIGNALING_PATHWAY	44	0.264057	0.959843	0.498986	0.802754	1	3734	tags=39%, list=34%, signal=59%
GO_ANTIGEN_PROCESSING_AND_PRESENTATION_OF_PEPTIDE_ANTIGEN_VIA_MHC_CLASS_I	52	0.317325	0.959537	0.491159	0.802896	1	3865	tags=52%, list=36%, signal=80%
GO_IN_UTERO_EMBRYONIC_DEVELOPMENT	178	0.210773	0.95926	0.501916	0.803021	1	2974	tags=29%, list=27%, signal=40%
GO_NEGATIVE_REGULATION_OF_AXONOGENESIS	34	0.278484	0.958957	0.509881	0.803196	1	2654	tags=32%, list=25%, signal=43%
GO_CELL_SURFACE_RECEPTOR_SIGNALING_PATHWAY_INVOLVED_IN_CELL_CELL_SIGNALING	46	0.26107	0.958638	0.5	0.803453	1	1447	tags=20%, list=13%, signal=22%
GO_NEUROPEPTIDE_SIGNALING_PATHWAY	40	0.292573	0.958239	0.538462	0.803852	1	2861	tags=43%, list=26%, signal=58%
GO_POSITIVE_REGULATION_OF_CYTOPLASMIC_TRANSPORT	171	0.204292	0.956951	0.548134	0.806438	1	2607	tags=26%, list=24%, signal=33%
GO_NEGATIVE_REGULATION_OF_CELL_CYCLE	252	0.195245	0.956483	0.504744	0.806983	1	3190	tags=30%, list=29%, signal=42%
GO_CALCIUM_ION_REGULATED_EXOCYTOSIS	43	0.259921	0.956373	0.494888	0.806639	1	2552	tags=35%, list=24%, signal=45%
GO_PEPTIDYL_AMINO_ACID_MODIFICATION	467	0.186199	0.956232	0.53816	0.806393	1	3292	tags=33%, list=30%, signal=45%
GO_ORGANELLE_FISSION	280	0.237314	0.955764	0.481766	0.806891	1	3559	tags=39%, list=33%, signal=56%
GO_POSITIVE_REGULATION_OF_NITRIC_OXIDE_SYNTHASE_ACTIVITY	16	0.317085	0.95567	0.494908	0.806543	1	2327	tags=38%, list=21%, signal=48%
GO_OXIDOREDUCTASE_ACTIVITY_ACTING_ON_CH_OH_GROUP_OF_DONORS	78	0.266324	0.955349	0.503171	0.806743	1	1707	tags=22%, list=16%, signal=26%
GO_PROTEIN_DEALKYLATION	17	0.350358	0.955237	0.530612	0.806422	1	1821	tags=29%, list=17%, signal=35%
GO_SODIUM_ION_TRANSMEMBRANE_TRANSPORTER_ACTIVITY	62	0.248601	0.953039	0.528046	0.811084	1	938	tags=16%, list=9%, signal=18%
GO_BLOOD_VESSEL_REMODELING	23	0.311414	0.952425	0.529412	0.812006	1	3373	tags=52%, list=31%, signal=76%
GO_POSITIVE_REGULATION_OF_INTRACELLULAR_PROTEIN_TRANSPORT	151	0.203811	0.952335	0.546012	0.811651	1	2499	tags=26%, list=23%, signal=33%
GO_NEGATIVE_REGULATION_OF_CELL_CYCLE_PROCESS	130	0.220017	0.951778	0.478599	0.812399	1	3040	tags=30%, list=28%, signal=41%
GO_STEROL_METABOLIC_PROCESS	75	0.264417	0.951203	0.542	0.813244	1	2503	tags=32%, list=23%, signal=41%
GO_HEART_DEVELOPMENT	289	0.216136	0.950991	0.51145	0.813157	1	2578	tags=28%, list=24%, signal=36%
GO_ANATOMICAL_STRUCTURE_HOMEOSTASIS	159	0.20176	0.950272	0.57	0.814407	1	1906	tags=21%, list=18%, signal=25%
GO_MICROBODY_LUMEN	26	0.30157	0.950194	0.494024	0.814016	1	31	tags=8%, list=0%, signal=8%
GO_MULTICELLULAR_ORGANISMAL_MACROMOLECULE_METABOLIC_PROCESS	43	0.318508	0.950007	0.484436	0.813872	1	1804	tags=33%, list=17%, signal=39%
GO_NADP_BINDING	24	0.287362	0.949175	0.516505	0.81534	1	2419	tags=29%, list=22%, signal=37%
GO_METALLOPEPTIDASE_ACTIVITY	98	0.224425	0.949137	0.499006	0.814856	1	1749	tags=20%, list=16%, signal=24%
GO_ENDOPEPTIDASE_ACTIVITY	235	0.211993	0.948971	0.557114	0.814675	1	2886	tags=31%, list=27%, signal=41%
GO_MEMBRANE_MICRODOMAIN	171	0.223394	0.948648	0.521318	0.814873	1	2604	tags=29%, list=24%, signal=38%
GO_CAJAL_BODY	26	0.302467	0.948011	0.519038	0.815789	1	640	tags=15%, list=6%, signal=16%
GO_POSITIVE_REGULATION_OF_CELL_DIVISION	65	0.250018	0.947674	0.508876	0.816055	1	1639	tags=22%, list=15%, signal=25%
GO_TELOMERE_ORGANIZATION	59	0.260139	0.947583	0.49501	0.815716	1	2753	tags=34%, list=25%, signal=45%
GO_PEPTIDASE_ACTIVITY	332	0.19408	0.947236	0.559184	0.815959	1	2781	tags=27%, list=26%, signal=36%
GO_REGULATION_OF_CALCIUM_ION_TRANSMEMBRANE_TRANSPORT	71	0.245045	0.946946	0.549618	0.816042	1	1756	tags=20%, list=16%, signal=23%
GO_CELLULAR_RESPONSE_TO_RADIATION	76	0.215054	0.946789	0.512346	0.815863	1	3176	tags=36%, list=29%, signal=50%
GO_LATE_ENDOSOME_MEMBRANE	52	0.255714	0.946347	0.517598	0.816389	1	1039	tags=17%, list=10%, signal=19%
GO_LIPID_MODIFICATION	106	0.217143	0.945224	0.52682	0.818419	1	2607	tags=28%, list=24%, signal=37%
GO_CELLULAR_MODIFIED_AMINO_ACID_BIOSYNTHETIC_PROCESS	33	0.27668	0.944481	0.513944	0.819682	1	2327	tags=30%, list=21%, signal=38%
GO_SEX_DIFFERENTIATION	165	0.221638	0.944215	0.565966	0.819716	1	2122	tags=23%, list=20%, signal=28%
GO_REGULATION_OF_SEQUENCE_SPECIFIC_DNA_BINDING_TRANSCRIPTION_FACTOR_ACTIVITY	207	0.202698	0.944206	0.543651	0.819155	1	2366	tags=25%, list=22%, signal=31%
GO_POSITIVE_REGULATION_OF_LIPASE_ACTIVITY	39	0.29038	0.944126	0.534091	0.818771	1	2494	tags=33%, list=23%, signal=43%
GO_NEGATIVE_REGULATION_OF_ORGANELLE_ORGANIZATION	232	0.2083	0.943545	0.536634	0.819547	1	3539	tags=35%, list=33%, signal=51%
GO_CHROMATIN_ORGANIZATION	368	0.211966	0.943497	0.541247	0.81911	1	2570	tags=26%, list=24%, signal=33%
GO_CELLULAR_RESPONSE_TO_CARBOHYDRATE_STIMULUS	39	0.267268	0.943221	0.523277	0.819204	1	2553	tags=28%, list=24%, signal=37%
GO_RECYCLING_ENDOSOME_MEMBRANE	17	0.311944	0.94318	0.516129	0.818723	1	964	tags=24%, list=9%, signal=26%
GO_REGULATION_OF_ACTION_POTENTIAL	25	0.286932	0.943053	0.533849	0.818432	1	2973	tags=48%, list=27%, signal=66%
GO_STRUCTURAL_CONSTITUENT_OF_CYTOSKELETON	60	0.260983	0.942862	0.54224	0.818323	1	2769	tags=33%, list=26%, signal=45%
GO_POSITIVE_REGULATION_OF_TELOMERE_MAINTENANCE_VIA_TELOMERE_LENGTHENING	19	0.31535	0.941505	0.539394	0.821039	1	2274	tags=26%, list=21%, signal=33%
GO_HEART_VALVE_DEVELOPMENT	22	0.320603	0.941368	0.536346	0.820791	1	1848	tags=23%, list=17%, signal=27%
GO_NEGATIVE_REGULATION_OF_DEVELOPMENTAL_PROCESS	451	0.201157	0.941182	0.539806	0.820676	1	1904	tags=21%, list=18%, signal=24%
GO_NUCLEAR_INNER_MEMBRANE	18	0.296383	0.940369	0.523438	0.82204	1	2049	tags=28%, list=19%, signal=34%
GO_REGULATION_OF_HISTONE_METHYLATION	36	0.288928	0.94006	0.507071	0.822209	1	2162	tags=28%, list=20%, signal=35%
GO_POSITIVE_REGULATION_OF_CALCIUM_ION_IMPORT	33	0.276861	0.939573	0.53167	0.822851	1	324	tags=12%, list=3%, signal=12%
GO_INORGANIC_ION_TRANSMEMBRANE_TRANSPORT	312	0.194844	0.93903	0.578431	0.823581	1	1703	tags=18%, list=16%, signal=20%
GO_NEGATIVE_REGULATION_OF_SIGNAL_TRANSDUCTION_IN_ABSENCE_OF_LIGAND	19	0.316639	0.938979	0.537074	0.823131	1	2328	tags=26%, list=21%, signal=33%
GO_POSITIVE_REGULATION_OF_REACTIVE_OXYGEN_SPECIES_BIOSYNTHETIC_PROCESS	29	0.299704	0.938889	0.532673	0.822769	1	3437	tags=41%, list=32%, signal=60%
GO_CORTICAL_CYTOSKELETON	46	0.24639	0.938537	0.549348	0.823032	1	2172	tags=26%, list=20%, signal=32%
GO_NEGATIVE_REGULATION_OF_PROTEIN_MODIFICATION_PROCESS	371	0.181029	0.938315	0.585462	0.822979	1	2336	tags=22%, list=22%, signal=27%
GO_DETECTION_OF_MECHANICAL_STIMULUS	24	0.310866	0.937835	0.539683	0.823569	1	2505	tags=33%, list=23%, signal=43%
GO_OVULATION_CYCLE	68	0.241612	0.936724	0.547244	0.825662	1	2098	tags=24%, list=19%, signal=29%
GO_NEGATIVE_REGULATION_OF_RESPONSE_TO_WOUNDING	75	0.262216	0.936246	0.520958	0.82627	1	1155	tags=19%, list=11%, signal=21%
GO_DEVELOPMENT_OF_PRIMARY_SEXUAL_CHARACTERISTICS	133	0.224133	0.935384	0.562863	0.827802	1	2098	tags=23%, list=19%, signal=28%
GO_REGULATION_OF_FATTY_ACID_BIOSYNTHETIC_PROCESS	23	0.304791	0.935014	0.56746	0.828137	1	2503	tags=35%, list=23%, signal=45%
GO_RAS_PROTEIN_SIGNAL_TRANSDUCTION	86	0.214398	0.934944	0.569498	0.827742	1	2606	tags=33%, list=24%, signal=43%
GO_CELLULAR_RESPONSE_TO_EPIDERMAL_GROWTH_FACTOR_STIMULUS	16	0.315011	0.934892	0.559761	0.827297	1	1315	tags=19%, list=12%, signal=21%
GO_CYTOSOLIC_TRANSPORT	111	0.217542	0.934433	0.556452	0.827785	1	2556	tags=25%, list=24%, signal=33%
GO_VESICLE_LOCALIZATION	118	0.216601	0.933934	0.560825	0.828428	1	2941	tags=31%, list=27%, signal=41%
GO_REGULATION_OF_POTASSIUM_ION_TRANSMEMBRANE_TRANSPORTER_ACTIVITY	23	0.293572	0.933796	0.535238	0.828185	1	1433	tags=22%, list=13%, signal=25%
GO_SIGNAL_TRANSDUCTION_BY_PROTEIN_PHOSPHORYLATION	224	0.196138	0.933084	0.598077	0.829283	1	2366	tags=25%, list=22%, signal=31%
GO_MYELOID_CELL_HOMEOSTASIS	56	0.241749	0.932899	0.545833	0.829156	1	2349	tags=32%, list=22%, signal=41%
GO_MICROTUBULE_BASED_MOVEMENT	114	0.217621	0.932532	0.538462	0.829424	1	2990	tags=33%, list=28%, signal=46%
GO_PROTEIN_UBIQUITINATION	359	0.179903	0.932509	0.586271	0.828913	1	3661	tags=37%, list=34%, signal=54%
GO_FILOPODIUM	50	0.238059	0.932018	0.557223	0.829534	1	2870	tags=38%, list=27%, signal=51%
GO_PROTEOGLYCAN_METABOLIC_PROCESS	47	0.280856	0.931989	0.522267	0.829042	1	3260	tags=40%, list=30%, signal=58%
GO_RAS_GUANYL_NUCLEOTIDE_EXCHANGE_FACTOR_ACTIVITY	128	0.224688	0.931966	0.543561	0.828537	1	2813	tags=31%, list=26%, signal=42%
GO_TRANSMEMBRANE_RECEPTOR_PROTEIN_TYROSINE_KINASE_SIGNALING_PATHWAY	286	0.200846	0.93141	0.585227	0.829265	1	2716	tags=28%, list=25%, signal=36%
GO_CORE_PROMOTER_PROXIMAL_REGION_DNA_BINDING	215	0.210106	0.931294	0.537285	0.828996	1	2283	tags=25%, list=21%, signal=31%
GO_REGULATION_OF_CELLULAR_RESPONSE_TO_STRESS	407	0.176751	0.931206	0.596117	0.828643	1	2607	tags=25%, list=24%, signal=32%
GO_LIPID_BIOSYNTHETIC_PROCESS	297	0.206231	0.931177	0.588583	0.828148	1	1887	tags=20%, list=17%, signal=24%
GO_NEUROTRANSMITTER_RECEPTOR_ACTIVITY	42	0.270202	0.931145	0.535573	0.827663	1	1947	tags=31%, list=18%, signal=38%
GO_DOUBLE_STRAND_BREAK_REPAIR	95	0.245175	0.930516	0.554902	0.828614	1	4047	tags=51%, list=37%, signal=80%
GO_APOPTOTIC_CELL_CLEARANCE	15	0.346324	0.93029	0.544379	0.828581	1	2853	tags=40%, list=26%, signal=54%
GO_NEGATIVE_REGULATION_OF_CHROMOSOME_ORGANIZATION	63	0.256177	0.929954	0.521401	0.828754	1	3527	tags=40%, list=33%, signal=59%
GO_GLUCOSAMINE_CONTAINING_COMPOUND_METABOLIC_PROCESS	17	0.30386	0.929596	0.541582	0.829045	1	3238	tags=47%, list=30%, signal=67%
GO_CELLULAR_RESPONSE_TO_HORMONE_STIMULUS	320	0.191084	0.929486	0.60161	0.828735	1	2186	tags=21%, list=20%, signal=26%
GO_INTRINSIC_APOPTOTIC_SIGNALING_PATHWAY	96	0.204737	0.92928	0.567951	0.828705	1	3277	tags=36%, list=30%, signal=52%
GO_HISTONE_ACETYLTRANSFERASE_BINDING	15	0.309163	0.928354	0.542339	0.830282	1	1776	tags=33%, list=16%, signal=40%
GO_ACTIVATION_OF_MAPKK_ACTIVITY	31	0.281114	0.9283	0.538752	0.829857	1	2661	tags=39%, list=25%, signal=51%
GO_LYTIC_VACUOLE	286	0.225504	0.92781	0.553061	0.830461	1	2344	tags=26%, list=22%, signal=33%
GO_KINASE_ACTIVATOR_ACTIVITY	39	0.26094	0.927176	0.544204	0.831326	1	1805	tags=21%, list=17%, signal=25%
GO_POSITIVE_REGULATION_OF_ENDOTHELIAL_CELL_MIGRATION	35	0.264598	0.925734	0.54943	0.834164	1	2071	tags=26%, list=19%, signal=32%
GO_REGULATION_OF_DNA_BINDING	54	0.240681	0.925317	0.558091	0.834519	1	2571	tags=30%, list=24%, signal=39%
GO_COATED_PIT	37	0.253882	0.925084	0.561303	0.834498	1	996	tags=16%, list=9%, signal=18%
GO_REGULATION_OF_ORGAN_FORMATION	21	0.310691	0.924688	0.555556	0.834872	1	1626	tags=24%, list=15%, signal=28%
GO_CERAMIDE_METABOLIC_PROCESS	45	0.278986	0.9243	0.546392	0.835231	1	1733	tags=24%, list=16%, signal=29%
GO_VOLTAGE_GATED_CALCIUM_CHANNEL_ACTIVITY	21	0.309809	0.924031	0.544732	0.835278	1	1137	tags=19%, list=11%, signal=21%
GO_SMALL_MOLECULE_BIOSYNTHETIC_PROCESS	240	0.205723	0.923103	0.57	0.836927	1	2516	tags=26%, list=23%, signal=33%
GO_REGULATION_OF_NEUROLOGICAL_SYSTEM_PROCESS	33	0.279182	0.922947	0.548507	0.83675	1	2716	tags=42%, list=25%, signal=56%
GO_RESPONSE_TO_HYDROGEN_PEROXIDE	72	0.229067	0.922881	0.597137	0.836346	1	2554	tags=28%, list=24%, signal=36%
GO_THYMUS_DEVELOPMENT	25	0.283775	0.922701	0.564797	0.836198	1	2541	tags=32%, list=23%, signal=42%
GO_MAINTENANCE_OF_PROTEIN_LOCALIZATION_IN_ORGANELLE	15	0.307095	0.922691	0.55579	0.835656	1	2643	tags=33%, list=24%, signal=44%
GO_RESPONSE_TO_ORGANOPHOSPHORUS	71	0.235302	0.922691	0.593626	0.835099	1	2814	tags=32%, list=26%, signal=43%
GO_POSITIVE_REGULATION_OF_CAMP_METABOLIC_PROCESS	54	0.252158	0.922469	0.577909	0.835035	1	1819	tags=24%, list=17%, signal=29%
GO_MULTICELLULAR_ORGANISM_METABOLIC_PROCESS	54	0.284585	0.92238	0.543021	0.834702	1	1804	tags=28%, list=17%, signal=33%
GO_CHLORIDE_CHANNEL_COMPLEX	18	0.330505	0.922249	0.562	0.834488	1	955	tags=17%, list=9%, signal=18%
GO_HETEROTRIMERIC_G_PROTEIN_COMPLEX	19	0.292477	0.920597	0.577735	0.837758	1	3010	tags=42%, list=28%, signal=58%
GO_NEGATIVE_REGULATION_OF_RESPONSE_TO_ENDOPLASMIC_RETICULUM_STRESS	17	0.304739	0.92047	0.557957	0.83746	1	2498	tags=35%, list=23%, signal=46%
GO_NEGATIVE_REGULATION_OF_LYMPHOCYTE_APOPTOTIC_PROCESS	15	0.335416	0.920454	0.566794	0.836945	1	2484	tags=40%, list=23%, signal=52%
GO_CELLULAR_RESPONSE_TO_PEPTIDE	161	0.201632	0.919697	0.601594	0.838204	1	1332	tags=16%, list=12%, signal=17%
GO_POTASSIUM_CHANNEL_ACTIVITY	66	0.244976	0.919644	0.579568	0.837761	1	2245	tags=29%, list=21%, signal=36%
GO_AGGRESOME	18	0.288901	0.918684	0.575	0.839448	1	1531	tags=28%, list=14%, signal=32%
GO_REGULATION_OF_DNA_METABOLIC_PROCESS	193	0.208147	0.918676	0.559772	0.838908	1	2663	tags=26%, list=25%, signal=34%
GO_RESPONSE_TO_TOXIC_SUBSTANCE	128	0.207796	0.91843	0.583851	0.838933	1	2567	tags=28%, list=24%, signal=36%
GO_REGULATION_OF_BLOOD_CIRCULATION	169	0.214358	0.917642	0.622568	0.840239	1	1972	tags=24%, list=18%, signal=29%
GO_PROTEIN_SERINE_THREONINE_KINASE_INHIBITOR_ACTIVITY	18	0.295924	0.91718	0.554924	0.840799	1	1060	tags=17%, list=10%, signal=18%
GO_MUSCLE_ORGAN_MORPHOGENESIS	46	0.295389	0.917057	0.556405	0.840549	1	2651	tags=39%, list=24%, signal=52%
GO_CHLORIDE_TRANSPORT	49	0.252037	0.917053	0.582677	0.840002	1	1398	tags=18%, list=13%, signal=21%
GO_STRUCTURAL_MOLECULE_ACTIVITY	415	0.221809	0.916887	0.531915	0.839849	1	1427	tags=19%, list=13%, signal=21%
GO_RESPONSE_TO_VITAMIN	59	0.239913	0.916822	0.591837	0.839448	1	2505	tags=29%, list=23%, signal=37%
GO_POSITIVE_REGULATION_OF_PHAGOCYTOSIS	27	0.298398	0.916436	0.582988	0.839788	1	3369	tags=56%, list=31%, signal=80%
GO_REGULATION_OF_MUSCLE_CONTRACTION	82	0.246956	0.916173	0.594747	0.839827	1	1447	tags=22%, list=13%, signal=25%
GO_TRANSCRIPTION_FACTOR_ACTIVITY_RNA_POLYMERASE_II_TRANSCRIPTION_FACTOR_BINDING	71	0.228027	0.915995	0.584016	0.839682	1	3495	tags=39%, list=32%, signal=58%
GO_REGULATION_OF_CARDIAC_MUSCLE_CONTRACTION	39	0.254178	0.915843	0.603025	0.839492	1	1378	tags=23%, list=13%, signal=26%
GO_ORGANIC_ACID_TRANSPORT	142	0.20898	0.915355	0.614625	0.840062	1	2884	tags=32%, list=27%, signal=43%
GO_RESPONSE_TO_PAIN	15	0.328603	0.915268	0.573469	0.839707	1	890	tags=20%, list=8%, signal=22%
GO_REGULATION_OF_ENDOTHELIAL_CELL_APOPTOTIC_PROCESS	20	0.320714	0.914654	0.536204	0.840566	1	1433	tags=20%, list=13%, signal=23%
GO_VOLTAGE_GATED_CATION_CHANNEL_ACTIVITY	70	0.241501	0.91401	0.577603	0.84147	1	2245	tags=27%, list=21%, signal=34%
GO_SKELETAL_MUSCLE_ORGAN_DEVELOPMENT	81	0.235008	0.913568	0.585742	0.841966	1	3413	tags=36%, list=32%, signal=52%
GO_UBIQUITIN_LIKE_PROTEIN_TRANSFERASE_ACTIVITY	245	0.18784	0.91325	0.626186	0.842143	1	3661	tags=38%, list=34%, signal=57%
GO_TRANS_GOLGI_NETWORK	117	0.209877	0.913089	0.593878	0.841953	1	2556	tags=26%, list=24%, signal=34%
GO_REGULATION_OF_ESTABLISHMENT_OF_PROTEIN_LOCALIZATION_TO_PLASMA_MEMBRANE	25	0.256774	0.912662	0.584677	0.842418	1	1288	tags=24%, list=12%, signal=27%
GO_REGULATION_OF_ACTIN_CYTOSKELETON_REORGANIZATION	18	0.353338	0.912562	0.568862	0.842102	1	3069	tags=39%, list=28%, signal=54%
GO_THIOESTER_METABOLIC_PROCESS	34	0.284258	0.912538	0.544898	0.841617	1	3084	tags=41%, list=28%, signal=57%
GO_CARBOHYDRATE_DERIVATIVE_TRANSPORTER_ACTIVITY	24	0.284092	0.911946	0.578218	0.842478	1	2655	tags=29%, list=25%, signal=39%
GO_DESMOSOME	15	0.400077	0.911793	0.530693	0.842291	1	2759	tags=47%, list=25%, signal=63%
GO_POSTSYNAPTIC_MEMBRANE	116	0.219552	0.911607	0.619543	0.842166	1	1947	tags=23%, list=18%, signal=28%
GO_NEGATIVE_REGULATION_OF_CYTOSKELETON_ORGANIZATION	128	0.221306	0.911473	0.557087	0.841929	1	3853	tags=41%, list=36%, signal=62%
GO_SKELETAL_MUSCLE_CELL_DIFFERENTIATION	33	0.269264	0.910624	0.565302	0.843363	1	3282	tags=42%, list=30%, signal=61%
GO_MITOTIC_CYTOKINESIS	22	0.313301	0.910542	0.55511	0.84301	1	4000	tags=50%, list=37%, signal=79%
GO_REGULATION_OF_RAS_PROTEIN_SIGNAL_TRANSDUCTION	105	0.224621	0.910447	0.58034	0.84268	1	2813	tags=32%, list=26%, signal=43%
GO_PROTEOGLYCAN_BINDING	19	0.325789	0.910207	0.546667	0.842656	1	3750	tags=58%, list=35%, signal=88%
GO_NEUROTRANSMITTER_TRANSPORTER_ACTIVITY	16	0.324734	0.910177	0.589595	0.84218	1	54	tags=13%, list=0%, signal=13%
GO_EARLY_ENDOSOME_MEMBRANE	59	0.240284	0.909573	0.571429	0.84304	1	2438	tags=27%, list=23%, signal=35%
GO_SITE_OF_DOUBLE_STRAND_BREAK	19	0.314189	0.909475	0.562	0.842712	1	4304	tags=58%, list=40%, signal=96%
GO_RESPONSE_TO_NUTRIENT	109	0.213876	0.909451	0.614458	0.842225	1	2505	tags=27%, list=23%, signal=34%
GO_NEGATIVE_REGULATION_OF_INTRACELLULAR_SIGNAL_TRANSDUCTION	259	0.185095	0.909367	0.637113	0.841874	1	2503	tags=24%, list=23%, signal=30%
GO_TISSUE_HOMEOSTASIS	93	0.219314	0.909358	0.618577	0.841342	1	1906	tags=22%, list=18%, signal=26%
GO_PEPTIDE_TRANSPORT	36	0.252	0.909138	0.61167	0.841289	1	3437	tags=47%, list=32%, signal=69%
GO_PROTEIN_MATURATION	154	0.206342	0.907363	0.615866	0.844853	1	2122	tags=22%, list=20%, signal=27%
GO_RAB_GUANYL_NUCLEOTIDE_EXCHANGE_FACTOR_ACTIVITY	18	0.303554	0.907232	0.581818	0.844634	1	4007	tags=61%, list=37%, signal=97%
GO_REGULATION_OF_CELL_MORPHOGENESIS	311	0.186674	0.906978	0.634981	0.844631	1	1966	tags=21%, list=18%, signal=25%
GO_MICROTUBULE_ASSOCIATED_COMPLEX	83	0.220508	0.906898	0.596154	0.844247	1	3150	tags=34%, list=29%, signal=47%
GO_REGULATION_OF_SYNAPSE_STRUCTURE_OR_ACTIVITY	121	0.22189	0.906774	0.592742	0.843983	1	2769	tags=31%, list=26%, signal=41%
GO_KINASE_REGULATOR_ACTIVITY	113	0.200181	0.906454	0.611524	0.844201	1	1805	tags=19%, list=17%, signal=22%
GO_TRANSITION_METAL_ION_HOMEOSTASIS	57	0.23359	0.906067	0.590361	0.844522	1	3209	tags=37%, list=30%, signal=52%
GO_PEPTIDE_HORMONE_BINDING	20	0.305775	0.905216	0.589069	0.84601	1	2186	tags=40%, list=20%, signal=50%
GO_MALE_GAMETE_GENERATION	258	0.188771	0.904953	0.658824	0.846053	1	3053	tags=32%, list=28%, signal=43%
GO_RNA_PHOSPHODIESTER_BOND_HYDROLYSIS	66	0.224886	0.904508	0.554865	0.846544	1	2880	tags=33%, list=27%, signal=45%
GO_REGULATION_OF_CALCIUM_ION_DEPENDENT_EXOCYTOSIS	42	0.240624	0.903597	0.613821	0.84803	1	2208	tags=29%, list=20%, signal=36%
GO_POSITIVE_REGULATION_OF_NEURON_PROJECTION_DEVELOPMENT	118	0.207341	0.902722	0.609709	0.849447	1	2858	tags=31%, list=26%, signal=41%
GO_CALMODULIN_BINDING	94	0.209144	0.90244	0.627413	0.849534	1	2259	tags=23%, list=21%, signal=29%
GO_NEGATIVE_REGULATION_OF_NERVOUS_SYSTEM_DEVELOPMENT	166	0.211328	0.899645	0.593688	0.85537	1	2381	tags=26%, list=22%, signal=33%
GO_PROTEIN_SERINE_THREONINE_PHOSPHATASE_ACTIVITY	43	0.229712	0.899587	0.66004	0.854965	1	2428	tags=26%, list=22%, signal=33%
GO_PROTEIN_MONOUBIQUITINATION	26	0.281743	0.899335	0.572277	0.855011	1	2159	tags=23%, list=20%, signal=29%
GO_REGULATION_OF_TOLL_LIKE_RECEPTOR_SIGNALING_PATHWAY	25	0.309551	0.898905	0.556202	0.855492	1	412	tags=12%, list=4%, signal=12%
GO_PROTEIN_ACETYLATION	79	0.227089	0.898884	0.605578	0.854991	1	3598	tags=41%, list=33%, signal=60%
GO_GENITALIA_DEVELOPMENT	33	0.255665	0.898616	0.62572	0.855083	1	3229	tags=42%, list=30%, signal=60%
GO_CARDIAC_VENTRICLE_MORPHOGENESIS	39	0.272035	0.898163	0.566219	0.855552	1	2571	tags=33%, list=24%, signal=44%
GO_RESPONSE_TO_PH	17	0.307193	0.897574	0.581532	0.856355	1	1787	tags=24%, list=17%, signal=28%
GO_SPERMATID_DIFFERENTIATION	66	0.227515	0.897439	0.640719	0.856104	1	3781	tags=47%, list=35%, signal=72%
GO_NUCLEAR_ENVELOPE_ORGANIZATION	42	0.243017	0.897422	0.585799	0.855592	1	3849	tags=43%, list=36%, signal=66%
GO_CENTROMERE_COMPLEX_ASSEMBLY	23	0.324726	0.896709	0.547094	0.85676	1	2753	tags=35%, list=25%, signal=47%
GO_MUSCLE_STRUCTURE_DEVELOPMENT	258	0.206937	0.896627	0.650888	0.856412	1	2657	tags=28%, list=25%, signal=37%
GO_MHC_CLASS_I_PROTEIN_BINDING	15	0.362057	0.896541	0.556436	0.856079	1	2954	tags=40%, list=27%, signal=55%
GO_REGULATION_OF_GLUCONEOGENESIS	24	0.26284	0.896351	0.647059	0.855966	1	3708	tags=50%, list=34%, signal=76%
GO_INTRINSIC_COMPONENT_OF_ENDOPLASMIC_RETICULUM_MEMBRANE	68	0.250147	0.895942	0.555773	0.856315	1	1340	tags=16%, list=12%, signal=18%
GO_CENTRIOLE	64	0.25262	0.89569	0.563241	0.856355	1	3436	tags=39%, list=32%, signal=57%
GO_ODONTOGENESIS_OF_DENTIN_CONTAINING_TOOTH	45	0.259228	0.895391	0.619231	0.856463	1	1579	tags=20%, list=15%, signal=23%
GO_POSITIVE_REGULATION_OF_VASOCONSTRICTION	21	0.303646	0.895079	0.593928	0.85659	1	3279	tags=48%, list=30%, signal=68%
GO_HOMEOSTASIS_OF_NUMBER_OF_CELLS_WITHIN_A_TISSUE	17	0.295703	0.894402	0.603884	0.8576	1	1014	tags=18%, list=9%, signal=19%
GO_PROTEIN_PHOSPHATASE_BINDING	80	0.21188	0.89422	0.625228	0.857448	1	1922	tags=21%, list=18%, signal=26%
GO_POSITIVE_REGULATION_OF_CELL_DEVELOPMENT	254	0.191681	0.893091	0.65692	0.85952	1	2578	tags=27%, list=24%, signal=35%
GO_PROTEIN_UBIQUITINATION_INVOLVED_IN_UBIQUITIN_DEPENDENT_PROTEIN_CATABOLIC_PROCESS	74	0.218961	0.893	0.620623	0.859185	1	3613	tags=41%, list=33%, signal=60%
GO_REGULATION_OF_SYSTEMIC_ARTERIAL_BLOOD_PRESSURE	54	0.253591	0.892968	0.604697	0.858703	1	1848	tags=26%, list=17%, signal=31%
GO_UDP_GLYCOSYLTRANSFERASE_ACTIVITY	76	0.223149	0.892842	0.625743	0.858444	1	3251	tags=38%, list=30%, signal=54%
GO_CELL_DIVISION	271	0.214623	0.892371	0.537594	0.858974	1	2982	tags=30%, list=28%, signal=40%
GO_HAIR_CELL_DIFFERENTIATION	17	0.294539	0.892178	0.594378	0.858897	1	2262	tags=24%, list=21%, signal=30%
GO_RESPONSE_TO_GLUCAGON	32	0.24574	0.892172	0.647173	0.858366	1	3010	tags=41%, list=28%, signal=56%
GO_TRANSCRIPTIONAL_ACTIVATOR_ACTIVITY_RNA_POLYMERASE_II_TRANSCRIPTION_REGULATORY_REGION_SEQUENCE_SPECIFIC_BINDING	192	0.208445	0.892033	0.63301	0.858097	1	2587	tags=27%, list=24%, signal=35%
GO_CELLULAR_RESPONSE_TO_STEROID_HORMONE_STIMULUS	130	0.196387	0.889993	0.667343	0.862264	1	3147	tags=29%, list=29%, signal=41%
GO_SUGAR_TRANSMEMBRANE_TRANSPORTER_ACTIVITY	17	0.30971	0.889212	0.594705	0.863516	1	1138	tags=18%, list=11%, signal=20%
GO_CHROMOSOME_ORGANIZATION_INVOLVED_IN_MEIOTIC_CELL_CYCLE	28	0.276461	0.888934	0.596117	0.863609	1	3007	tags=43%, list=28%, signal=59%
GO_MEIOTIC_CHROMOSOME_SEGREGATION	34	0.274678	0.888721	0.587891	0.863572	1	3007	tags=44%, list=28%, signal=61%
GO_POTASSIUM_ION_TRANSPORT	82	0.22171	0.888591	0.636542	0.863298	1	2245	tags=26%, list=21%, signal=32%
GO_CIRCADIAN_REGULATION_OF_GENE_EXPRESSION	30	0.25802	0.888493	0.618952	0.862948	1	2991	tags=30%, list=28%, signal=41%
GO_INTERSTRAND_CROSS_LINK_REPAIR	22	0.289928	0.888433	0.597166	0.862553	1	3566	tags=45%, list=33%, signal=68%
GO_REGULATION_OF_BEHAVIOR	29	0.273924	0.888365	0.609603	0.862168	1	1175	tags=17%, list=11%, signal=19%
GO_NEGATIVE_REGULATION_OF_CELL_CYCLE_PHASE_TRANSITION	92	0.213226	0.88757	0.604167	0.863503	1	2705	tags=27%, list=25%, signal=36%
GO_SECRETORY_GRANULE	190	0.20708	0.887522	0.645361	0.863081	1	2838	tags=32%, list=26%, signal=42%
GO_NEGATIVE_REGULATION_OF_ENDOTHELIAL_CELL_PROLIFERATION	18	0.297678	0.887208	0.613767	0.86322	1	1433	tags=22%, list=13%, signal=26%
GO_MORPHOGENESIS_OF_A_BRANCHING_STRUCTURE	93	0.22524	0.887123	0.609524	0.862872	1	1385	tags=15%, list=13%, signal=17%
GO_CLUSTER_OF_ACTIN_BASED_CELL_PROJECTIONS	84	0.209645	0.88674	0.677543	0.86318	1	2248	tags=24%, list=21%, signal=30%
GO_NEGATIVE_REGULATION_OF_PROTEIN_MATURATION	24	0.270545	0.886735	0.624754	0.862653	1	3700	tags=46%, list=34%, signal=69%
GO_POST_EMBRYONIC_DEVELOPMENT	46	0.231565	0.886472	0.649694	0.862664	1	323	tags=11%, list=3%, signal=11%
GO_SODIUM_ION_TRANSPORT	73	0.213249	0.886243	0.660269	0.862625	1	1582	tags=19%, list=15%, signal=22%
GO_MEIOTIC_CELL_CYCLE_PROCESS	82	0.233703	0.886047	0.609195	0.86254	1	2832	tags=32%, list=26%, signal=43%
GO_EYE_PHOTORECEPTOR_CELL_DIFFERENTIATION	19	0.283289	0.886014	0.628099	0.862073	1	3781	tags=47%, list=35%, signal=73%
GO_REGULATION_OF_LIPASE_ACTIVITY	48	0.258494	0.885217	0.612476	0.863302	1	2494	tags=31%, list=23%, signal=40%
GO_POSITIVE_REGULATION_OF_PHOSPHOLIPASE_ACTIVITY	33	0.28001	0.885083	0.619048	0.86307	1	2494	tags=30%, list=23%, signal=39%
GO_MICROBODY_MEMBRANE	31	0.258764	0.885033	0.597194	0.862655	1	2411	tags=29%, list=22%, signal=37%
GO_ANATOMICAL_STRUCTURE_MATURATION	21	0.282714	0.884943	0.621677	0.862321	1	1982	tags=29%, list=18%, signal=35%
GO_PHOSPHATIDYLINOSITOL_3_KINASE_BINDING	19	0.298884	0.884762	0.588822	0.862165	1	1016	tags=21%, list=9%, signal=23%
GO_CELLULAR_RESPONSE_TO_NITROGEN_COMPOUND	283	0.179919	0.884525	0.703422	0.862161	1	2607	tags=25%, list=24%, signal=32%
GO_PROTEIN_DOMAIN_SPECIFIC_BINDING	366	0.171938	0.884298	0.692161	0.862161	1	1900	tags=18%, list=18%, signal=21%
GO_HEXOSE_CATABOLIC_PROCESS	28	0.283883	0.88358	0.598309	0.863321	1	3777	tags=54%, list=35%, signal=82%
GO_VESICLE_ORGANIZATION	150	0.198025	0.883416	0.65873	0.863161	1	2952	tags=28%, list=27%, signal=38%
GO_NEGATIVE_REGULATION_OF_CELLULAR_AMIDE_METABOLIC_PROCESS	67	0.233733	0.881872	0.608187	0.866182	1	3219	tags=39%, list=30%, signal=55%
GO_MONOSACCHARIDE_BINDING	39	0.261149	0.881449	0.591093	0.866585	1	3868	tags=51%, list=36%, signal=79%
GO_DEVELOPMENTAL_INDUCTION	17	0.30262	0.881098	0.617188	0.866839	1	1385	tags=24%, list=13%, signal=27%
GO_ENDOCRINE_PROCESS	32	0.274185	0.880612	0.604331	0.867429	1	1074	tags=22%, list=10%, signal=24%
GO_PROTEIN_LOCALIZATION_TO_NUCLEUS	80	0.209944	0.880583	0.693387	0.866945	1	3273	tags=33%, list=30%, signal=46%
GO_VACUOLAR_PART	379	0.194984	0.880047	0.613227	0.867613	1	1812	tags=19%, list=17%, signal=22%
GO_RESPONSE_TO_FLUID_SHEAR_STRESS	20	0.301046	0.880039	0.577075	0.867102	1	1818	tags=25%, list=17%, signal=30%
GO_POSTTRANSCRIPTIONAL_GENE_SILENCING	24	0.287826	0.87967	0.590291	0.867391	1	3394	tags=46%, list=31%, signal=67%
GO_REGULATION_OF_CELL_FATE_COMMITMENT	16	0.313972	0.879204	0.644788	0.867904	1	1622	tags=31%, list=15%, signal=37%
GO_REGULATION_OF_POTASSIUM_ION_TRANSMEMBRANE_TRANSPORT	35	0.251707	0.879014	0.624746	0.867799	1	1433	tags=17%, list=13%, signal=20%
GO_EATING_BEHAVIOR	17	0.312395	0.878728	0.631373	0.867885	1	2973	tags=47%, list=27%, signal=65%
GO_OUTFLOW_TRACT_MORPHOGENESIS	36	0.26841	0.878459	0.640316	0.86795	1	3703	tags=47%, list=34%, signal=72%
GO_PLASMA_MEMBRANE_ORGANIZATION	115	0.193285	0.878442	0.678917	0.867453	1	1977	tags=22%, list=18%, signal=26%
GO_MICROTUBULE_POLYMERIZATION_OR_DEPOLYMERIZATION	21	0.283413	0.87842	0.612167	0.866967	1	3662	tags=43%, list=34%, signal=65%
GO_HYDROLASE_ACTIVITY_ACTING_ON_ACID_ANHYDRIDES	476	0.165738	0.878293	0.745665	0.866739	1	3111	tags=28%, list=29%, signal=38%
GO_NEGATIVE_REGULATION_OF_TRANSCRIPTION_FROM_RNA_POLYMERASE_II_PROMOTER	403	0.183874	0.877808	0.660156	0.867273	1	2578	tags=26%, list=24%, signal=33%
GO_AUTOPHAGOSOME	48	0.239334	0.876302	0.616977	0.870061	1	1379	tags=19%, list=13%, signal=21%
GO_MULTI_ORGANISM_LOCALIZATION	42	0.247331	0.876172	0.637275	0.869767	1	3261	tags=31%, list=30%, signal=44%
GO_CELLULAR_LIPID_METABOLIC_PROCESS	497	0.187296	0.875703	0.678501	0.870298	1	1887	tags=19%, list=17%, signal=22%
GO_MODIFICATION_BY_SYMBIONT_OF_HOST_MORPHOLOGY_OR_PHYSIOLOGY	24	0.279649	0.875673	0.620623	0.86984	1	3293	tags=42%, list=30%, signal=60%
GO_CATION_TRANSPORT	441	0.176182	0.875662	0.757282	0.869324	1	2252	tags=21%, list=21%, signal=26%
GO_POSITIVE_REGULATION_OF_CHROMATIN_MODIFICATION	56	0.236916	0.875083	0.636555	0.870069	1	2530	tags=27%, list=23%, signal=35%
GO_REGULATION_OF_NUCLEOTIDE_CATABOLIC_PROCESS	22	0.270356	0.875067	0.633721	0.869573	1	2633	tags=32%, list=24%, signal=42%
GO_CLATHRIN_ADAPTOR_COMPLEX	18	0.268437	0.874841	0.634387	0.869571	1	2556	tags=33%, list=24%, signal=44%
GO_RNA_POLYMERASE_II_TRANSCRIPTION_COFACTOR_ACTIVITY	52	0.228767	0.873995	0.637097	0.870935	1	3495	tags=42%, list=32%, signal=62%
GO_REGULATION_OF_PLASMA_MEMBRANE_ORGANIZATION	43	0.22879	0.873822	0.65587	0.870802	1	1288	tags=19%, list=12%, signal=21%
GO_SENSORY_PERCEPTION_OF_PAIN	38	0.256852	0.873641	0.670782	0.870691	1	2593	tags=34%, list=24%, signal=45%
GO_MEMBRANE_FUSION	80	0.206004	0.873621	0.676171	0.87019	1	2924	tags=31%, list=27%, signal=42%
GO_PHOSPHATASE_BINDING	105	0.195307	0.873344	0.703065	0.87031	1	1922	tags=20%, list=18%, signal=24%
GO_TRANSCRIPTION_FACTOR_COMPLEX	174	0.193531	0.872809	0.657948	0.871015	1	3665	tags=40%, list=34%, signal=60%
GO_POSITIVE_REGULATION_OF_CELL_CYCLE_ARREST	52	0.228385	0.872511	0.620553	0.871159	1	3183	tags=37%, list=29%, signal=52%
GO_MONOSACCHARIDE_TRANSPORT	34	0.250074	0.872461	0.62395	0.870731	1	1138	tags=18%, list=11%, signal=20%
GO_REGULATION_OF_NEUROBLAST_PROLIFERATION	19	0.273329	0.87241	0.655238	0.870321	1	2104	tags=32%, list=19%, signal=39%
GO_SISTER_CHROMATID_COHESION	53	0.300177	0.872284	0.577651	0.87008	1	3150	tags=38%, list=29%, signal=53%
GO_CHROMOSOME_CENTROMERIC_REGION	87	0.270642	0.871831	0.589354	0.870576	1	2768	tags=29%, list=26%, signal=38%
GO_INORGANIC_ANION_TRANSPORT	65	0.227066	0.871753	0.672	0.870235	1	3345	tags=35%, list=31%, signal=51%
GO_ENZYME_LINKED_RECEPTOR_PROTEIN_SIGNALING_PATHWAY	391	0.184836	0.871707	0.683712	0.869816	1	2716	tags=27%, list=25%, signal=35%
GO_NEURAL_PRECURSOR_CELL_PROLIFERATION	50	0.240106	0.871527	0.642202	0.869651	1	1999	tags=26%, list=18%, signal=32%
GO_PHOSPHOLIPID_TRANSPORTER_ACTIVITY	26	0.252761	0.87134	0.630738	0.869545	1	3973	tags=54%, list=37%, signal=85%
GO_REGULATION_OF_CELLULAR_COMPONENT_BIOGENESIS	410	0.171714	0.871072	0.75835	0.869633	1	2478	tags=23%, list=23%, signal=29%
GO_ENDODERM_DEVELOPMENT	45	0.247822	0.870867	0.640777	0.869537	1	1925	tags=24%, list=18%, signal=30%
GO_POSITIVE_REGULATION_OF_KIDNEY_DEVELOPMENT	16	0.313878	0.870771	0.631164	0.86922	1	629	tags=19%, list=6%, signal=20%
GO_REGULATION_OF_PROTEIN_ACETYLATION	39	0.229422	0.8704	0.677866	0.869496	1	749	tags=13%, list=7%, signal=14%
GO_METANEPHROS_DEVELOPMENT	47	0.249938	0.870346	0.668675	0.869095	1	1805	tags=23%, list=17%, signal=28%
GO_POSITIVE_REGULATION_OF_MULTI_ORGANISM_PROCESS	80	0.200071	0.870196	0.660532	0.868904	1	2494	tags=25%, list=23%, signal=32%
GO_PROTEIN_LOCALIZATION_TO_VACUOLE	21	0.280024	0.869877	0.62	0.869064	1	2158	tags=29%, list=20%, signal=36%
GO_MUSCLE_ADAPTATION	23	0.271971	0.869348	0.616466	0.869713	1	2763	tags=35%, list=26%, signal=47%
GO_POSITIVE_REGULATION_OF_ION_TRANSPORT	138	0.197573	0.86889	0.718631	0.8702	1	2494	tags=29%, list=23%, signal=37%
GO_TRANSFORMING_GROWTH_FACTOR_BETA_RECEPTOR_BINDING	31	0.268043	0.868856	0.618861	0.869746	1	467	tags=13%, list=4%, signal=13%
GO_NEGATIVE_REGULATION_OF_REACTIVE_OXYGEN_SPECIES_METABOLIC_PROCESS	21	0.280279	0.868396	0.681159	0.870265	1	3040	tags=43%, list=28%, signal=59%
GO_RNA_POLYMERASE_BINDING	16	0.301677	0.868299	0.627083	0.869967	1	3398	tags=50%, list=31%, signal=73%
GO_NCRNA_TRANSCRIPTION	43	0.24529	0.86743	0.62753	0.871354	1	3641	tags=40%, list=34%, signal=59%
GO_REGULATION_OF_INTRACELLULAR_PROTEIN_TRANSPORT	211	0.178828	0.867094	0.748031	0.871573	1	2612	tags=26%, list=24%, signal=33%
GO_CELL_CYCLE_PHASE_TRANSITION	156	0.228733	0.866806	0.574074	0.871641	1	3541	tags=38%, list=33%, signal=55%
GO_RESPONSE_TO_REACTIVE_OXYGEN_SPECIES	129	0.200209	0.866702	0.707317	0.87136	1	3252	tags=32%, list=30%, signal=45%
GO_SYNAPTIC_VESICLE_LOCALIZATION	56	0.22825	0.865879	0.663223	0.872611	1	2552	tags=29%, list=24%, signal=37%
GO_HORMONE_ACTIVITY	42	0.256247	0.865875	0.680244	0.87209	1	3381	tags=43%, list=31%, signal=62%
GO_SH3_DOMAIN_BINDING	74	0.220404	0.865256	0.661914	0.872971	1	2472	tags=27%, list=23%, signal=35%
GO_ANION_TRANSPORT	262	0.187605	0.864692	0.739726	0.873657	1	2989	tags=31%, list=28%, signal=41%
GO_SIGNAL_TRANSDUCTION_IN_RESPONSE_TO_DNA_DAMAGE	57	0.21648	0.863479	0.678363	0.875871	1	4019	tags=44%, list=37%, signal=69%
GO_TRANSCRIPTIONAL_REPRESSOR_ACTIVITY_RNA_POLYMERASE_II_ACTIVATING_TRANSCRIPTION_FACTOR_BINDING	29	0.2572	0.863469	0.643725	0.875371	1	3495	tags=48%, list=32%, signal=71%
GO_CONDENSED_CHROMOSOME	97	0.248413	0.863349	0.583333	0.8751	1	2648	tags=28%, list=24%, signal=37%
GO_HORMONE_MEDIATED_SIGNALING_PATHWAY	94	0.201576	0.862404	0.680982	0.876667	1	2186	tags=20%, list=20%, signal=25%
GO_CULLIN_RING_UBIQUITIN_LIGASE_COMPLEX	84	0.197322	0.862257	0.691235	0.876462	1	3144	tags=33%, list=29%, signal=47%
GO_NEGATIVE_REGULATION_OF_PHOSPHORYLATION	264	0.175136	0.862011	0.745763	0.876451	1	2472	tags=24%, list=23%, signal=31%
GO_ATP_DEPENDENT_CHROMATIN_REMODELING	39	0.264902	0.861346	0.633401	0.877398	1	2803	tags=28%, list=26%, signal=38%
GO_NUCLEOTIDE_PHOSPHORYLATION	37	0.262228	0.860068	0.607966	0.879616	1	2419	tags=30%, list=22%, signal=38%
GO_UBIQUITIN_LIGASE_COMPLEX	152	0.180313	0.86	0.714008	0.879227	1	3502	tags=35%, list=32%, signal=51%
GO_CELLULAR_RESPONSE_TO_EXTERNAL_STIMULUS	150	0.193665	0.859642	0.715431	0.879479	1	2578	tags=26%, list=24%, signal=34%
GO_VENTRICULAR_SYSTEM_DEVELOPMENT	15	0.299034	0.858875	0.66004	0.880651	1	1679	tags=27%, list=16%, signal=32%
GO_PROTEIN_LOCALIZATION_TO_CELL_PERIPHERY	89	0.195657	0.858803	0.724206	0.880304	1	1865	tags=22%, list=17%, signal=27%
GO_REGULATION_OF_DNA_BIOSYNTHETIC_PROCESS	57	0.232092	0.858238	0.665323	0.881042	1	1843	tags=21%, list=17%, signal=25%
GO_CELL_FATE_COMMITMENT_INVOLVED_IN_FORMATION_OF_PRIMARY_GERM_LAYER	21	0.28007	0.857849	0.634799	0.881391	1	898	tags=19%, list=8%, signal=21%
GO_AXON	234	0.186496	0.857739	0.711462	0.881113	1	1966	tags=20%, list=18%, signal=24%
GO_RETINOL_METABOLIC_PROCESS	16	0.321926	0.856801	0.652778	0.882631	1	1386	tags=25%, list=13%, signal=29%
GO_NEGATIVE_REGULATION_OF_CELL_DEVELOPMENT	188	0.19494	0.8561	0.689109	0.883613	1	2381	tags=26%, list=22%, signal=33%
GO_CARDIAC_VENTRICLE_DEVELOPMENT	60	0.239103	0.856078	0.662745	0.883138	1	2571	tags=30%, list=24%, signal=39%
GO_CELL_DIFFERENTIATION_IN_SPINAL_CORD	30	0.267222	0.85524	0.648374	0.884409	1	1676	tags=27%, list=15%, signal=31%
GO_CELLULAR_MODIFIED_AMINO_ACID_METABOLIC_PROCESS	131	0.200845	0.854896	0.709205	0.884623	1	2397	tags=24%, list=22%, signal=30%
GO_CYCLIC_NUCLEOTIDE_BIOSYNTHETIC_PROCESS	19	0.285746	0.854856	0.670659	0.884188	1	843	tags=21%, list=8%, signal=23%
GO_REGULATION_OF_CARTILAGE_DEVELOPMENT	31	0.282613	0.854371	0.643585	0.884732	1	1805	tags=26%, list=17%, signal=31%
GO_UBIQUITIN_LIKE_PROTEIN_CONJUGATING_ENZYME_BINDING	23	0.254893	0.853151	0.684105	0.886862	1	1491	tags=22%, list=14%, signal=25%
GO_CELLULAR_RESPONSE_TO_ESTROGEN_STIMULUS	25	0.259986	0.85291	0.662526	0.886856	1	2861	tags=36%, list=26%, signal=49%
GO_MICROTUBULE_ORGANIZING_CENTER_PART	87	0.222552	0.852715	0.631679	0.886737	1	3436	tags=33%, list=32%, signal=48%
GO_NEURON_DEATH	30	0.233432	0.851813	0.684959	0.888139	1	1104	tags=20%, list=10%, signal=22%
GO_NEGATIVE_REGULATION_OF_MITOCHONDRION_ORGANIZATION	23	0.270966	0.851647	0.637427	0.887968	1	3895	tags=43%, list=36%, signal=68%
GO_POSITIVE_REGULATION_OF_APOPTOTIC_SIGNALING_PATHWAY	95	0.204954	0.851525	0.666667	0.887714	1	3282	tags=35%, list=30%, signal=49%
GO_ANAPHASE_PROMOTING_COMPLEX_DEPENDENT_CATABOLIC_PROCESS	47	0.285332	0.850733	0.602386	0.888902	1	3865	tags=49%, list=36%, signal=76%
GO_REGULATION_OF_NUCLEAR_DIVISION	98	0.214984	0.850628	0.618952	0.888605	1	3559	tags=32%, list=33%, signal=47%
GO_ORGANIC_ANION_TRANSPORT	201	0.187496	0.850395	0.760956	0.888587	1	2958	tags=32%, list=27%, signal=43%
GO_CARBOHYDRATE_BIOSYNTHETIC_PROCESS	80	0.223356	0.85036	0.668737	0.888144	1	3353	tags=39%, list=31%, signal=56%
GO_POLYOL_METABOLIC_PROCESS	56	0.228565	0.850224	0.714851	0.887914	1	1373	tags=18%, list=13%, signal=20%
GO_REGULATION_OF_CELL_SUBSTRATE_ADHESION	96	0.212805	0.84985	0.724665	0.8882	1	2387	tags=28%, list=22%, signal=36%
GO_NUCLEOSIDE_TRIPHOSPHATASE_REGULATOR_ACTIVITY	194	0.179891	0.849408	0.756863	0.888598	1	2153	tags=19%, list=20%, signal=23%
GO_RESPONSE_TO_ESTRADIOL	91	0.201804	0.849263	0.722449	0.888407	1	3279	tags=32%, list=30%, signal=45%
GO_NEGATIVE_REGULATION_OF_RESPONSE_TO_EXTERNAL_STIMULUS	140	0.20552	0.849231	0.700197	0.88796	1	1403	tags=17%, list=13%, signal=19%
GO_REGULATION_OF_CELL_MORPHOGENESIS_INVOLVED_IN_DIFFERENTIATION	193	0.190082	0.848452	0.724206	0.889123	1	1927	tags=21%, list=18%, signal=25%
GO_ACTIVATION_OF_PHOSPHOLIPASE_C_ACTIVITY	18	0.304448	0.848418	0.649907	0.888674	1	1397	tags=22%, list=13%, signal=25%
GO_OLIGODENDROCYTE_DIFFERENTIATION	35	0.240054	0.848416	0.672691	0.888156	1	1022	tags=17%, list=9%, signal=19%
GO_REGULATION_OF_SENSORY_PERCEPTION	18	0.302065	0.847841	0.64786	0.88888	1	2593	tags=44%, list=24%, signal=58%
GO_CYSTEINE_TYPE_ENDOPEPTIDASE_ACTIVITY	42	0.228657	0.847344	0.668639	0.889405	1	3380	tags=43%, list=31%, signal=62%
GO_ION_ANTIPORTER_ACTIVITY	25	0.255651	0.847205	0.654691	0.889151	1	938	tags=16%, list=9%, signal=17%
GO_P53_BINDING	39	0.228461	0.847134	0.696099	0.888773	1	3070	tags=31%, list=28%, signal=43%
GO_HSP70_PROTEIN_BINDING	18	0.268168	0.847029	0.683809	0.888482	1	176	tags=11%, list=2%, signal=11%
GO_CIS_TRANS_ISOMERASE_ACTIVITY	20	0.274384	0.846275	0.613497	0.889605	1	3775	tags=45%, list=35%, signal=69%
GO_SPINDLE_CHECKPOINT	19	0.303317	0.845403	0.627863	0.891004	1	3474	tags=37%, list=32%, signal=54%
GO_IRON_ION_BINDING	87	0.229732	0.844901	0.722555	0.891549	1	1261	tags=16%, list=12%, signal=18%
GO_ACTIN_BASED_CELL_PROJECTION	97	0.198438	0.844104	0.752495	0.892761	1	2870	tags=30%, list=27%, signal=40%
GO_ORGANIC_HYDROXY_COMPOUND_TRANSPORT	79	0.215701	0.843413	0.751984	0.893737	1	1360	tags=18%, list=13%, signal=20%
GO_PROTEIN_DEPOLYMERIZATION	17	0.291216	0.842732	0.642998	0.894733	1	1372	tags=18%, list=13%, signal=20%
GO_VOLTAGE_GATED_ION_CHANNEL_ACTIVITY	101	0.212249	0.842581	0.722334	0.894547	1	1972	tags=23%, list=18%, signal=28%
GO_CELL_SUBSTRATE_JUNCTION_ASSEMBLY	28	0.272206	0.84227	0.649798	0.8947	1	3024	tags=43%, list=28%, signal=59%
GO_AMELOGENESIS	15	0.30559	0.842086	0.692593	0.894567	1	3731	tags=47%, list=34%, signal=71%
GO_POSITIVE_REGULATION_OF_AUTOPHAGY	44	0.223068	0.841995	0.698795	0.894231	1	2694	tags=32%, list=25%, signal=42%
GO_SARCOPLASMIC_RETICULUM_MEMBRANE	19	0.285067	0.841944	0.702913	0.893807	1	909	tags=16%, list=8%, signal=17%
GO_PATTERNING_OF_BLOOD_VESSELS	19	0.287634	0.841496	0.646217	0.89425	1	3373	tags=37%, list=31%, signal=53%
GO_SPERM_MOTILITY	27	0.255946	0.841239	0.659044	0.894274	1	1525	tags=22%, list=14%, signal=26%
GO_REGULATION_OF_EPITHELIAL_CELL_APOPTOTIC_PROCESS	29	0.259897	0.840888	0.701375	0.89451	1	2337	tags=24%, list=22%, signal=31%
GO_GLUCOSE_METABOLIC_PROCESS	84	0.209458	0.840867	0.682	0.894039	1	2516	tags=27%, list=23%, signal=35%
GO_SNARE_BINDING	64	0.208763	0.840796	0.734151	0.893658	1	3081	tags=36%, list=28%, signal=50%
GO_TOXIN_TRANSPORT	22	0.271089	0.840495	0.64657	0.893771	1	2776	tags=41%, list=26%, signal=55%
GO_POSITIVE_REGULATION_OF_SKELETAL_MUSCLE_TISSUE_DEVELOPMENT	19	0.320991	0.840171	0.696356	0.893925	1	3750	tags=53%, list=35%, signal=80%
GO_STEROID_CATABOLIC_PROCESS	15	0.309813	0.840159	0.682828	0.893431	1	1360	tags=20%, list=13%, signal=23%
GO_BRANCHING_INVOLVED_IN_URETERIC_BUD_MORPHOGENESIS	24	0.274705	0.838457	0.697897	0.896577	1	562	tags=17%, list=5%, signal=18%
GO_CELL_PROJECTION_ASSEMBLY	144	0.190679	0.83845	0.735178	0.896072	1	2798	tags=28%, list=26%, signal=37%
GO_CYSTEINE_TYPE_PEPTIDASE_ACTIVITY	82	0.194173	0.838413	0.746	0.895633	1	3801	tags=40%, list=35%, signal=62%
GO_CALCIUM_CHANNEL_COMPLEX	34	0.255391	0.836718	0.686598	0.898578	1	657	tags=15%, list=6%, signal=16%
GO_MESENCHYME_DEVELOPMENT	120	0.208332	0.836563	0.699411	0.89838	1	1627	tags=19%, list=15%, signal=22%
GO_INTERSPECIES_INTERACTION_BETWEEN_ORGANISMS	367	0.181186	0.835706	0.661355	0.899693	1	3268	tags=30%, list=30%, signal=42%
GO_REGULATION_OF_DEVELOPMENTAL_GROWTH	164	0.186187	0.835076	0.794175	0.900495	1	2283	tags=24%, list=21%, signal=30%
GO_NEGATIVE_REGULATION_OF_MITOTIC_CELL_CYCLE	121	0.192483	0.835008	0.716797	0.900142	1	3183	tags=30%, list=29%, signal=42%
GO_NEGATIVE_REGULATION_OF_DEPHOSPHORYLATION	36	0.218718	0.834832	0.755859	0.899982	1	1576	tags=19%, list=15%, signal=23%
GO_GLYCOSYLATION	143	0.18692	0.834132	0.77732	0.900889	1	3251	tags=31%, list=30%, signal=44%
GO_PHOSPHATASE_INHIBITOR_ACTIVITY	21	0.252944	0.83368	0.709091	0.901327	1	2791	tags=33%, list=26%, signal=45%
GO_PHOSPHATASE_REGULATOR_ACTIVITY	50	0.212506	0.833631	0.748526	0.900904	1	3090	tags=32%, list=29%, signal=45%
GO_NEGATIVE_REGULATION_OF_MAPK_CASCADE	94	0.190949	0.833562	0.756917	0.900541	1	1468	tags=16%, list=14%, signal=18%
GO_MEIOTIC_CELL_CYCLE	104	0.213382	0.832987	0.674286	0.901206	1	2832	tags=29%, list=26%, signal=39%
GO_SPHINGOLIPID_METABOLIC_PROCESS	79	0.223899	0.832457	0.703854	0.901758	1	1733	tags=20%, list=16%, signal=24%
GO_CARDIAC_CONDUCTION	49	0.235347	0.832223	0.713147	0.901737	1	1972	tags=24%, list=18%, signal=30%
GO_REGULATION_OF_FATTY_ACID_OXIDATION	23	0.262707	0.832095	0.673428	0.901499	1	937	tags=17%, list=9%, signal=19%
GO_RETINOIC_ACID_RECEPTOR_BINDING	20	0.275085	0.831723	0.697813	0.901783	1	1199	tags=20%, list=11%, signal=22%
GO_CORONARY_VASCULATURE_DEVELOPMENT	15	0.296138	0.831285	0.702259	0.902193	1	857	tags=20%, list=8%, signal=22%
GO_REGULATION_OF_DNA_REPAIR	45	0.226633	0.831224	0.688109	0.901806	1	3956	tags=42%, list=37%, signal=66%
GO_REGULATION_OF_CHROMOSOME_ORGANIZATION	169	0.196924	0.830993	0.699801	0.90174	1	2530	tags=24%, list=23%, signal=31%
GO_DNA_METABOLIC_PROCESS	426	0.1882	0.830611	0.684318	0.90199	1	3642	tags=34%, list=34%, signal=50%
GO_PROTEIN_CATABOLIC_PROCESS	329	0.165628	0.82954	0.810976	0.903781	1	3613	tags=34%, list=33%, signal=49%
GO_INTERACTION_WITH_SYMBIONT	32	0.241729	0.829521	0.714575	0.903308	1	3240	tags=34%, list=30%, signal=49%
GO_REGULATION_OF_ENDOTHELIAL_CELL_PROLIFERATION	56	0.217428	0.829043	0.710775	0.903792	1	1482	tags=18%, list=14%, signal=21%
GO_TRANSCRIPTIONAL_REPRESSOR_ACTIVITY_RNA_POLYMERASE_II_TRANSCRIPTION_FACTOR_BINDING	40	0.227831	0.8274	0.711066	0.906693	1	3495	tags=43%, list=32%, signal=63%
GO_CHROMATIN_BINDING	249	0.185557	0.826386	0.7154	0.908307	1	3133	tags=31%, list=29%, signal=43%
GO_EMBRYO_IMPLANTATION	20	0.267202	0.826308	0.729124	0.907949	1	2328	tags=30%, list=21%, signal=38%
GO_CELLULAR_RESPONSE_TO_DNA_DAMAGE_STIMULUS	404	0.174238	0.825711	0.753086	0.908743	1	3541	tags=34%, list=33%, signal=49%
GO_REGULATION_OF_PROTEIN_CATABOLIC_PROCESS	223	0.169432	0.825053	0.810277	0.909573	1	2387	tags=22%, list=22%, signal=27%
GO_POSITIVE_REGULATION_OF_LYASE_ACTIVITY	34	0.233577	0.824855	0.758964	0.909493	1	941	tags=15%, list=9%, signal=16%
GO_CELL_JUNCTION_ORGANIZATION	103	0.214249	0.824378	0.689861	0.909951	1	2579	tags=28%, list=24%, signal=37%
GO_MONOCARBOXYLIC_ACID_TRANSMEMBRANE_TRANSPORTER_ACTIVITY	25	0.259304	0.823127	0.707843	0.912002	1	1381	tags=24%, list=13%, signal=27%
GO_REGULATION_OF_CHONDROCYTE_DIFFERENTIATION	22	0.284578	0.822019	0.643863	0.913763	1	1805	tags=27%, list=17%, signal=33%
GO_NEGATIVE_REGULATION_OF_CHROMOSOME_SEGREGATION	19	0.290509	0.821578	0.636364	0.9142	1	3474	tags=37%, list=32%, signal=54%
GO_MEMBRANE_LIPID_BIOSYNTHETIC_PROCESS	62	0.218148	0.821407	0.692623	0.913995	1	1827	tags=21%, list=17%, signal=25%
GO_RIBONUCLEASE_ACTIVITY	55	0.206527	0.821293	0.725159	0.913732	1	2880	tags=33%, list=27%, signal=44%
GO_BRUSH_BORDER	64	0.205958	0.821176	0.766798	0.913453	1	2776	tags=30%, list=26%, signal=40%
GO_REGULATION_OF_PHOSPHOLIPASE_ACTIVITY	41	0.251886	0.820752	0.715128	0.913822	1	2494	tags=29%, list=23%, signal=38%
GO_REGULATION_OF_TRANSMEMBRANE_RECEPTOR_PROTEIN_SERINE_THREONINE_KINASE_SIGNALING_PATHWAY	126	0.200521	0.820695	0.764706	0.913421	1	1805	tags=21%, list=17%, signal=24%
GO_NEGATIVE_REGULATION_OF_COAGULATION	23	0.321132	0.820666	0.698603	0.912959	1	593	tags=17%, list=5%, signal=18%
GO_METHYLATED_HISTONE_BINDING	30	0.245257	0.820475	0.697959	0.912855	1	2367	tags=30%, list=22%, signal=38%
GO_REGULATION_OF_TRANSMEMBRANE_TRANSPORT	229	0.177653	0.820311	0.824663	0.912674	1	1972	tags=19%, list=18%, signal=22%
GO_REGULATION_OF_ACTIN_FILAMENT_BUNDLE_ASSEMBLY	40	0.229296	0.82011	0.733584	0.912583	1	2607	tags=33%, list=24%, signal=43%
GO_NEUROTRANSMITTER_METABOLIC_PROCESS	16	0.276606	0.820005	0.718623	0.912257	1	1788	tags=25%, list=17%, signal=30%
GO_ACTIVATION_OF_GTPASE_ACTIVITY	45	0.234357	0.819822	0.709474	0.912111	1	3646	tags=38%, list=34%, signal=57%
GO_UROGENITAL_SYSTEM_DEVELOPMENT	164	0.203946	0.819541	0.713733	0.912157	1	2805	tags=29%, list=26%, signal=39%
GO_POSITIVE_REGULATION_OF_CELLULAR_PROTEIN_LOCALIZATION	207	0.166235	0.819111	0.85	0.912497	1	2499	tags=24%, list=23%, signal=30%
GO_MUSCLE_CONTRACTION	134	0.206991	0.818964	0.736538	0.91228	1	1486	tags=20%, list=14%, signal=23%
GO_DISULFIDE_OXIDOREDUCTASE_ACTIVITY	20	0.266002	0.818846	0.683897	0.912012	1	1699	tags=20%, list=16%, signal=24%
GO_NEGATIVE_REGULATION_OF_CYTOPLASMIC_TRANSPORT	64	0.204976	0.818201	0.757396	0.91278	1	1396	tags=16%, list=13%, signal=18%
GO_STEROID_HYDROXYLASE_ACTIVITY	16	0.359417	0.81816	0.713115	0.912351	1	1261	tags=31%, list=12%, signal=35%
GO_INTRACELLULAR_RECEPTOR_SIGNALING_PATHWAY	100	0.190624	0.818123	0.768595	0.911923	1	1298	tags=13%, list=12%, signal=15%
GO_POSITIVE_REGULATION_OF_ADENYLATE_CYCLASE_ACTIVITY	27	0.240017	0.817669	0.76998	0.912355	1	941	tags=15%, list=9%, signal=16%
GO_SEMAPHORIN_PLEXIN_SIGNALING_PATHWAY	21	0.274538	0.817476	0.686391	0.912239	1	3348	tags=43%, list=31%, signal=62%
GO_EMBRYONIC_CAMERA_TYPE_EYE_MORPHOGENESIS	17	0.302994	0.817451	0.653846	0.911784	1	3117	tags=47%, list=29%, signal=66%
GO_KINETOCHORE	55	0.27621	0.815843	0.640151	0.914446	1	3650	tags=38%, list=34%, signal=57%
GO_RESPONSE_TO_PURINE_CONTAINING_COMPOUND	81	0.200015	0.814839	0.820565	0.915957	1	2814	tags=31%, list=26%, signal=41%
GO_PEPTIDE_N_ACETYLTRANSFERASE_ACTIVITY	35	0.243409	0.814762	0.700389	0.915596	1	3598	tags=43%, list=33%, signal=64%
GO_GUANOSINE_CONTAINING_COMPOUND_METABOLIC_PROCESS	27	0.237308	0.814494	0.754757	0.915631	1	1040	tags=15%, list=10%, signal=16%
GO_GLIAL_CELL_DEVELOPMENT	46	0.218126	0.814471	0.753906	0.915184	1	1721	tags=22%, list=16%, signal=26%
GO_GLYCOPROTEIN_BINDING	53	0.230366	0.814124	0.73913	0.915353	1	2777	tags=32%, list=26%, signal=43%
GO_CYTOSKELETAL_PROTEIN_BINDING	460	0.164962	0.813727	0.839458	0.915596	1	3077	tags=29%, list=28%, signal=39%
GO_LAMELLIPODIUM	107	0.19346	0.813615	0.778203	0.915304	1	2870	tags=29%, list=27%, signal=39%
GO_REGULATION_OF_SYNAPSE_ORGANIZATION	54	0.232329	0.81241	0.699234	0.917256	1	2647	tags=28%, list=24%, signal=37%
GO_EPITHELIAL_TUBE_BRANCHING_INVOLVED_IN_LUNG_MORPHOGENESIS	15	0.302948	0.812287	0.713427	0.916996	1	1385	tags=20%, list=13%, signal=23%
GO_EMBRYONIC_CAMERA_TYPE_EYE_DEVELOPMENT	27	0.266025	0.812127	0.724846	0.91681	1	3215	tags=48%, list=30%, signal=68%
GO_REGULATION_OF_CARBOHYDRATE_CATABOLIC_PROCESS	25	0.241504	0.811359	0.75	0.917866	1	2633	tags=32%, list=24%, signal=42%
GO_RHO_GTPASE_BINDING	47	0.210531	0.811108	0.771255	0.917864	1	3545	tags=38%, list=33%, signal=57%
GO_ORGANIC_HYDROXY_COMPOUND_BIOSYNTHETIC_PROCESS	100	0.198811	0.811054	0.793372	0.917459	1	1103	tags=15%, list=10%, signal=17%
GO_MICROBODY	72	0.203915	0.810595	0.743381	0.917855	1	2152	tags=22%, list=20%, signal=28%
GO_NEGATIVE_REGULATION_OF_JNK_CASCADE	23	0.243256	0.810117	0.740234	0.918242	1	176	tags=9%, list=2%, signal=9%
GO_ANTIMICROBIAL_HUMORAL_RESPONSE	24	0.289095	0.809761	0.739479	0.91845	1	3340	tags=50%, list=31%, signal=72%
GO_REGULATION_OF_KERATINOCYTE_PROLIFERATION	17	0.292345	0.809662	0.714	0.918132	1	3655	tags=47%, list=34%, signal=71%
GO_REGULATION_OF_MUSCLE_HYPERTROPHY	24	0.249674	0.809555	0.701863	0.91784	1	2270	tags=25%, list=21%, signal=32%
GO_POSITIVE_REGULATION_OF_ORGANELLE_ORGANIZATION	310	0.163785	0.809416	0.849594	0.917579	1	3003	tags=27%, list=28%, signal=36%
GO_RESPONSE_TO_GROWTH_FACTOR	273	0.174429	0.809376	0.830189	0.91714	1	2539	tags=25%, list=23%, signal=31%
GO_ADP_METABOLIC_PROCESS	30	0.25798	0.808324	0.673597	0.918741	1	3777	tags=50%, list=35%, signal=77%
GO_REGULATION_OF_PROTEIN_TARGETING	180	0.17326	0.808284	0.861111	0.918304	1	2612	tags=25%, list=24%, signal=32%
GO_PHOSPHORIC_DIESTER_HYDROLASE_ACTIVITY	55	0.210988	0.806841	0.77193	0.920643	1	3690	tags=42%, list=34%, signal=63%
GO_CALCIUM_DEPENDENT_PHOSPHOLIPID_BINDING	27	0.239668	0.806384	0.757339	0.920996	1	397	tags=11%, list=4%, signal=12%
GO_REGULATION_OF_NEURON_DIFFERENTIATION	311	0.177445	0.806226	0.802372	0.920788	1	2881	tags=28%, list=27%, signal=37%
GO_CELL_CYCLE_ARREST	84	0.189279	0.804902	0.797642	0.922965	1	1124	tags=13%, list=10%, signal=14%
GO_DOUBLE_STRANDED_DNA_BINDING	445	0.171378	0.804865	0.812866	0.922527	1	2587	tags=24%, list=24%, signal=31%
GO_PROTEIN_C_TERMINUS_BINDING	117	0.180609	0.804298	0.819086	0.923144	1	3128	tags=30%, list=29%, signal=42%
GO_POSITIVE_REGULATION_OF_DENDRITE_MORPHOGENESIS	18	0.264063	0.803932	0.698444	0.923345	1	1514	tags=22%, list=14%, signal=26%
GO_CARBOXYPEPTIDASE_ACTIVITY	17	0.268987	0.803561	0.705996	0.923528	1	801	tags=18%, list=7%, signal=19%
GO_POSITIVE_REGULATION_OF_PATHWAY_RESTRICTED_SMAD_PROTEIN_PHOSPHORYLATION	28	0.254592	0.802797	0.751953	0.924498	1	3164	tags=39%, list=29%, signal=55%
GO_PYRIMIDINE_NUCLEOSIDE_METABOLIC_PROCESS	22	0.242893	0.802424	0.76	0.924725	1	1294	tags=23%, list=12%, signal=26%
GO_POSITIVE_REGULATION_OF_INTRINSIC_APOPTOTIC_SIGNALING_PATHWAY	32	0.2281	0.801428	0.724696	0.926201	1	2152	tags=25%, list=20%, signal=31%
GO_REGULATION_OF_EPITHELIAL_CELL_DIFFERENTIATION	72	0.204246	0.801191	0.787356	0.926142	1	1315	tags=15%, list=12%, signal=17%
GO_ACYLGLYCEROL_O_ACYLTRANSFERASE_ACTIVITY	15	0.333675	0.800672	0.727634	0.926657	1	1876	tags=33%, list=17%, signal=40%
GO_RIBONUCLEOSIDE_DIPHOSPHATE_METABOLIC_PROCESS	39	0.231197	0.800563	0.709419	0.926385	1	3777	tags=49%, list=35%, signal=75%
GO_REGULATION_OF_FATTY_ACID_METABOLIC_PROCESS	53	0.202195	0.799956	0.813433	0.927042	1	1853	tags=21%, list=17%, signal=25%
GO_REPLICATION_FORK	39	0.264043	0.798986	0.652259	0.928346	1	3968	tags=51%, list=37%, signal=81%
GO_RESPONSE_TO_CAMP	55	0.215471	0.798586	0.806061	0.928634	1	2814	tags=33%, list=26%, signal=44%
GO_REGULATION_OF_PHOSPHOLIPASE_C_ACTIVITY	25	0.265221	0.798148	0.744802	0.929004	1	2494	tags=32%, list=23%, signal=41%
GO_NUCLEAR_TRANSPORT	204	0.167828	0.798133	0.840249	0.928531	1	3337	tags=31%, list=31%, signal=44%
GO_TRANSCRIPTION_FACTOR_BINDING	304	0.163844	0.798117	0.851464	0.928053	1	2256	tags=21%, list=21%, signal=26%
GO_REGULATION_OF_COFACTOR_METABOLIC_PROCESS	29	0.237944	0.797892	0.737736	0.928001	1	2633	tags=34%, list=24%, signal=45%
GO_MONOSACCHARIDE_BIOSYNTHETIC_PROCESS	38	0.246924	0.797633	0.708163	0.927976	1	2883	tags=37%, list=27%, signal=50%
GO_TRANSCRIPTION_FROM_RNA_POLYMERASE_II_PROMOTER	422	0.165017	0.797372	0.865191	0.928006	1	3453	tags=32%, list=32%, signal=45%
GO_REGULATION_OF_GLIOGENESIS	47	0.218071	0.796939	0.755299	0.928321	1	2799	tags=30%, list=26%, signal=40%
GO_RETINA_HOMEOSTASIS	33	0.241155	0.796303	0.793372	0.929029	1	1906	tags=24%, list=18%, signal=29%
GO_GOLGI_VESICLE_TRANSPORT	175	0.182297	0.79628	0.785276	0.928575	1	3081	tags=27%, list=28%, signal=38%
GO_EXTRINSIC_COMPONENT_OF_ORGANELLE_MEMBRANE	15	0.276646	0.795691	0.75	0.929152	1	1379	tags=20%, list=13%, signal=23%
GO_NEGATIVE_REGULATION_OF_DENDRITE_DEVELOPMENT	21	0.258797	0.795304	0.732106	0.929366	1	1315	tags=19%, list=12%, signal=22%
GO_STRUCTURAL_CONSTITUENT_OF_MUSCLE	25	0.266305	0.794733	0.724206	0.92989	1	570	tags=16%, list=5%, signal=17%
GO_REGULATION_OF_CATION_TRANSMEMBRANE_TRANSPORT	118	0.178371	0.794148	0.84658	0.930566	1	1487	tags=14%, list=14%, signal=16%
GO_FEMALE_SEX_DIFFERENTIATION	76	0.202078	0.794134	0.804734	0.930086	1	2823	tags=28%, list=26%, signal=37%
GO_LENS_DEVELOPMENT_IN_CAMERA_TYPE_EYE	43	0.217823	0.793806	0.773469	0.930218	1	1580	tags=19%, list=15%, signal=22%
GO_DETECTION_OF_CHEMICAL_STIMULUS_INVOLVED_IN_SENSORY_PERCEPTION_OF_TASTE	16	0.310925	0.793709	0.70894	0.929873	1	635	tags=13%, list=6%, signal=13%
GO_RECYCLING_ENDOSOME	70	0.191054	0.793704	0.770961	0.929376	1	2198	tags=23%, list=20%, signal=28%
GO_FOREBRAIN_DEVELOPMENT	217	0.183897	0.793154	0.822957	0.929961	1	1999	tags=21%, list=18%, signal=25%
GO_SERINE_HYDROLASE_ACTIVITY	132	0.213279	0.793033	0.775967	0.929688	1	2781	tags=32%, list=26%, signal=42%
GO_LIMBIC_SYSTEM_DEVELOPMENT	57	0.208551	0.791834	0.785567	0.931469	1	1966	tags=19%, list=18%, signal=23%
GO_NEGATIVE_REGULATION_OF_VIRAL_GENOME_REPLICATION	31	0.261546	0.791086	0.70303	0.932393	1	1785	tags=23%, list=16%, signal=27%
GO_POSITIVE_REGULATION_OF_CHROMOSOME_ORGANIZATION	86	0.202585	0.790531	0.748988	0.932902	1	2530	tags=24%, list=23%, signal=32%
GO_EAR_DEVELOPMENT	108	0.201625	0.790286	0.8	0.93283	1	1756	tags=19%, list=16%, signal=23%
GO_COVALENT_CHROMATIN_MODIFICATION	191	0.183148	0.789422	0.732422	0.934006	1	3300	tags=32%, list=30%, signal=45%
GO_CUL3_RING_UBIQUITIN_LIGASE_COMPLEX	34	0.220264	0.788854	0.784394	0.934561	1	2827	tags=35%, list=26%, signal=48%
GO_PYRIMIDINE_NUCLEOTIDE_METABOLIC_PROCESS	23	0.239453	0.788548	0.747475	0.93465	1	1061	tags=17%, list=10%, signal=19%
GO_MUSCLE_ORGAN_DEVELOPMENT	165	0.195629	0.787861	0.779497	0.935439	1	3413	tags=37%, list=32%, signal=53%
GO_RESPONSE_TO_RETINOIC_ACID	64	0.21757	0.787679	0.818	0.935269	1	1758	tags=22%, list=16%, signal=26%
GO_BONE_MINERALIZATION	16	0.287495	0.787315	0.757519	0.935454	1	3213	tags=44%, list=30%, signal=62%
GO_MORPHOGENESIS_OF_AN_EPITHELIUM	223	0.180106	0.786943	0.823643	0.935645	1	1697	tags=17%, list=16%, signal=20%
GO_REGULATORY_REGION_NUCLEIC_ACID_BINDING	472	0.170226	0.786604	0.829746	0.935801	1	2587	tags=25%, list=24%, signal=31%
GO_REGULATION_OF_CATECHOLAMINE_SECRETION	20	0.27525	0.784586	0.75534	0.93898	1	1947	tags=30%, list=18%, signal=37%
GO_REGULATION_OF_NEURON_PROJECTION_DEVELOPMENT	228	0.175363	0.784196	0.843373	0.939213	1	3350	tags=34%, list=31%, signal=48%
GO_REGULATION_OF_RHO_PROTEIN_SIGNAL_TRANSDUCTION	65	0.21327	0.784105	0.768775	0.938867	1	2813	tags=34%, list=26%, signal=45%
GO_PYRIMIDINE_RIBONUCLEOSIDE_METABOLIC_PROCESS	15	0.272271	0.783746	0.76	0.939022	1	1294	tags=27%, list=12%, signal=30%
GO_LEARNING	70	0.188302	0.783379	0.828685	0.939201	1	2153	tags=23%, list=20%, signal=28%
GO_ION_GATED_CHANNEL_ACTIVITY	23	0.247359	0.782863	0.768	0.93961	1	4096	tags=57%, list=38%, signal=91%
GO_NEGATIVE_REGULATION_OF_GROWTH	135	0.175464	0.781521	0.889313	0.941598	1	2283	tags=23%, list=21%, signal=29%
GO_MUSCLE_FIBER_DEVELOPMENT	31	0.237097	0.780628	0.754941	0.942687	1	3527	tags=42%, list=33%, signal=62%
GO_AXIS_ELONGATION	19	0.262777	0.780336	0.763158	0.942681	1	1385	tags=21%, list=13%, signal=24%
GO_MICROTUBULE	236	0.16561	0.779771	0.847953	0.943197	1	3650	tags=36%, list=34%, signal=53%
GO_NEGATIVE_REGULATION_OF_CELL_CYCLE_G1_S_PHASE_TRANSITION	61	0.194679	0.779521	0.794821	0.943109	1	2697	tags=28%, list=25%, signal=37%
GO_AUTOPHAGY	229	0.167387	0.779471	0.87957	0.942696	1	2215	tags=20%, list=20%, signal=24%
GO_EXCITATORY_SYNAPSE	121	0.179952	0.779019	0.831622	0.943	1	2347	tags=26%, list=22%, signal=32%
GO_NUCLEOSIDE_DIPHOSPHATE_METABOLIC_PROCESS	49	0.217444	0.778596	0.746392	0.943284	1	2419	tags=29%, list=22%, signal=37%
GO_ATP_GENERATION_FROM_ADP	23	0.257678	0.778054	0.684848	0.943792	1	2814	tags=39%, list=26%, signal=53%
GO_NUCLEAR_MATRIX	54	0.208636	0.777756	0.769384	0.943825	1	3086	tags=35%, list=29%, signal=49%
GO_REGULATION_OF_CELLULAR_PROTEIN_CATABOLIC_PROCESS	159	0.172049	0.777622	0.853119	0.943557	1	3771	tags=38%, list=35%, signal=57%
GO_CHROMATIN_MODIFICATION	305	0.175387	0.77749	0.754386	0.943275	1	3557	tags=34%, list=33%, signal=49%
GO_NUCLEOBASE_METABOLIC_PROCESS	24	0.236267	0.777485	0.788462	0.942784	1	2328	tags=29%, list=21%, signal=37%
GO_TETRAPYRROLE_BINDING	74	0.221097	0.777295	0.836401	0.94263	1	2360	tags=27%, list=22%, signal=34%
GO_REGULATION_OF_DNA_REPLICATION	92	0.201536	0.777119	0.76494	0.94245	1	1843	tags=20%, list=17%, signal=23%
GO_VASCULAR_PROCESS_IN_CIRCULATORY_SYSTEM	101	0.195273	0.776596	0.863727	0.942902	1	2516	tags=29%, list=23%, signal=37%
GO_POSITIVE_REGULATION_OF_BLOOD_CIRCULATION	54	0.2081	0.776214	0.834971	0.943068	1	2497	tags=31%, list=23%, signal=41%
GO_CELLULAR_RESPONSE_TO_ESTRADIOL_STIMULUS	20	0.246587	0.775676	0.760417	0.943532	1	2861	tags=40%, list=26%, signal=54%
GO_MUCOPOLYSACCHARIDE_METABOLIC_PROCESS	66	0.217372	0.774859	0.793587	0.9445	1	2842	tags=30%, list=26%, signal=41%
GO_REGULATION_OF_SYSTEMIC_ARTERIAL_BLOOD_PRESSURE_MEDIATED_BY_A_CHEMICAL_SIGNAL	33	0.241037	0.774491	0.77451	0.944684	1	1074	tags=18%, list=10%, signal=20%
GO_TRANSCRIPTION_ELONGATION_FACTOR_COMPLEX	20	0.25234	0.774439	0.765306	0.944274	1	2421	tags=30%, list=22%, signal=39%
GO_DNA_REPLICATION_INITIATION	16	0.337225	0.773879	0.664762	0.944767	1	4410	tags=56%, list=41%, signal=95%
GO_RESPONSE_TO_ELECTRICAL_STIMULUS	25	0.236186	0.773743	0.808333	0.944484	1	3437	tags=40%, list=32%, signal=58%
GO_SINGLE_STRANDED_DNA_BINDING	46	0.228516	0.773475	0.722222	0.944441	1	3532	tags=41%, list=33%, signal=61%
GO_LIGAND_DEPENDENT_NUCLEAR_RECEPTOR_TRANSCRIPTION_COACTIVATOR_ACTIVITY	37	0.205718	0.773232	0.803181	0.944365	1	3453	tags=38%, list=32%, signal=55%
GO_ENDOPLASMIC_RETICULUM_LUMEN	113	0.210999	0.773045	0.745491	0.944197	1	2532	tags=26%, list=23%, signal=33%
GO_NUCLEAR_ENVELOPE	212	0.16513	0.772666	0.864754	0.944358	1	3616	tags=35%, list=33%, signal=51%
GO_NEGATIVE_REGULATION_OF_MAP_KINASE_ACTIVITY	50	0.196169	0.772577	0.859649	0.944021	1	1468	tags=14%, list=14%, signal=16%
GO_PROTEIN_MODIFICATION_BY_SMALL_PROTEIN_CONJUGATION_OR_REMOVAL	482	0.15134	0.772208	0.902299	0.944192	1	3666	tags=35%, list=34%, signal=51%
GO_GROWTH	245	0.168157	0.771951	0.874525	0.944111	1	2387	tags=22%, list=22%, signal=28%
GO_ACTIVATION_OF_ADENYLATE_CYCLASE_ACTIVITY	23	0.237319	0.771663	0.837624	0.944138	1	877	tags=13%, list=8%, signal=14%
GO_REGULATION_OF_CELLULAR_PROTEIN_LOCALIZATION	308	0.154393	0.771402	0.921488	0.944139	1	2612	tags=23%, list=24%, signal=30%
GO_STEROID_BIOSYNTHETIC_PROCESS	67	0.231757	0.770829	0.793774	0.944659	1	2503	tags=27%, list=23%, signal=35%
GO_NUCLEAR_MEMBRANE	135	0.169325	0.769982	0.878728	0.945613	1	3379	tags=31%, list=31%, signal=45%
GO_REGULATION_OF_TUMOR_NECROSIS_FACTOR_MEDIATED_SIGNALING_PATHWAY	26	0.247371	0.769776	0.754601	0.945467	1	3933	tags=46%, list=36%, signal=72%
GO_RETROGRADE_TRANSPORT_ENDOSOME_TO_GOLGI	32	0.221553	0.768104	0.784114	0.94785	1	727	tags=9%, list=7%, signal=10%
GO_NUCLEAR_PERIPHERY	65	0.20242	0.767968	0.779324	0.947584	1	3086	tags=35%, list=29%, signal=49%
GO_ATPASE_ACTIVITY	244	0.163234	0.767495	0.898374	0.947913	1	3081	tags=28%, list=28%, signal=38%
GO_CARBOHYDRATE_DERIVATIVE_BIOSYNTHETIC_PROCESS	313	0.157665	0.766649	0.923237	0.948793	1	3449	tags=32%, list=32%, signal=46%
GO_NEGATIVE_REGULATION_OF_PROTEIN_SERINE_THREONINE_KINASE_ACTIVITY	80	0.179248	0.76632	0.900778	0.948827	1	1468	tags=14%, list=14%, signal=16%
GO_NUCLEOTIDE_KINASE_ACTIVITY	18	0.237273	0.765811	0.791985	0.949201	1	1061	tags=17%, list=10%, signal=18%
GO_EXONUCLEASE_ACTIVITY	43	0.206576	0.765102	0.788618	0.949868	1	1155	tags=12%, list=11%, signal=13%
GO_NUCLEOBASE_CONTAINING_COMPOUND_TRANSMEMBRANE_TRANSPORTER_ACTIVITY	18	0.253404	0.765077	0.768145	0.949412	1	2655	tags=28%, list=25%, signal=37%
GO_PROTEIN_TYROSINE_PHOSPHATASE_ACTIVITY	57	0.184432	0.764777	0.846154	0.949426	1	1658	tags=18%, list=15%, signal=21%
GO_MULTIVESICULAR_BODY_ORGANIZATION	16	0.252795	0.764474	0.769874	0.949475	1	1169	tags=13%, list=11%, signal=14%
GO_MESONEPHRIC_TUBULE_MORPHOGENESIS	28	0.233259	0.764354	0.812854	0.9492	1	562	tags=14%, list=5%, signal=15%
GO_NUCLEOSIDE_PHOSPHATE_CATABOLIC_PROCESS	40	0.205417	0.764316	0.824847	0.948767	1	705	tags=10%, list=7%, signal=11%
GO_NUCLEIC_ACID_PHOSPHODIESTER_BOND_HYDROLYSIS	148	0.169179	0.763918	0.821782	0.948954	1	2880	tags=25%, list=27%, signal=34%
GO_PYRIMIDINE_CONTAINING_COMPOUND_BIOSYNTHETIC_PROCESS	21	0.238161	0.763579	0.784836	0.949028	1	1061	tags=19%, list=10%, signal=21%
GO_POSITIVE_REGULATION_OF_MUSCLE_TISSUE_DEVELOPMENT	38	0.230694	0.762962	0.827038	0.949539	1	2482	tags=29%, list=23%, signal=37%
GO_MEMBRANE_DOCKING	32	0.219628	0.761953	0.81893	0.950784	1	1808	tags=22%, list=17%, signal=26%
GO_MUSCLE_HYPERTROPHY	19	0.250688	0.761939	0.787763	0.950306	1	3273	tags=42%, list=30%, signal=60%
GO_STEROID_HORMONE_MEDIATED_SIGNALING_PATHWAY	78	0.183413	0.761033	0.84127	0.951317	1	230	tags=6%, list=2%, signal=7%
GO_ORGANELLE_SUBCOMPARTMENT	185	0.166242	0.76071	0.87885	0.951361	1	3085	tags=29%, list=28%, signal=40%
GO_EXTRACELLULAR_MATRIX_BINDING	26	0.268218	0.760169	0.760234	0.951807	1	2649	tags=35%, list=24%, signal=46%
GO_REGULATION_OF_TRANSCRIPTION_FROM_RNA_POLYMERASE_II_PROMOTER_IN_RESPONSE_TO_HYPOXIA	15	0.250593	0.759327	0.758691	0.952682	1	3541	tags=40%, list=33%, signal=59%
GO_POSITIVE_REGULATION_OF_GENE_EXPRESSION_EPIGENETIC	45	0.228169	0.759289	0.727451	0.952247	1	2879	tags=29%, list=27%, signal=39%
GO_O_ACYLTRANSFERASE_ACTIVITY	23	0.271914	0.758686	0.770138	0.952724	1	2144	tags=30%, list=20%, signal=38%
GO_GOLGI_TO_PLASMA_MEMBRANE_TRANSPORT	23	0.232707	0.758485	0.808943	0.952554	1	3081	tags=35%, list=28%, signal=49%
GO_PROTEINACEOUS_EXTRACELLULAR_MATRIX	191	0.216595	0.758013	0.74269	0.952846	1	2108	tags=25%, list=19%, signal=31%
GO_MEMBRANE_PROTEIN_PROTEOLYSIS	17	0.248304	0.757561	0.795918	0.953121	1	1442	tags=18%, list=13%, signal=20%
GO_NEGATIVE_REGULATION_OF_DEVELOPMENTAL_GROWTH	48	0.203654	0.757009	0.871287	0.953542	1	2381	tags=25%, list=22%, signal=32%
GO_ESTABLISHMENT_OR_MAINTENANCE_OF_BIPOLAR_CELL_POLARITY	15	0.257658	0.756997	0.795761	0.953062	1	2387	tags=33%, list=22%, signal=43%
GO_RESPONSE_TO_CORTICOSTERONE	17	0.269035	0.756327	0.788119	0.95368	1	1208	tags=18%, list=11%, signal=20%
GO_SCAVENGER_RECEPTOR_ACTIVITY	21	0.260288	0.755764	0.80117	0.954098	1	1623	tags=24%, list=15%, signal=28%
GO_SNARE_COMPLEX	25	0.23101	0.755656	0.786448	0.953777	1	2924	tags=36%, list=27%, signal=49%
GO_MULTICELLULAR_ORGANISMAL_SIGNALING	67	0.207161	0.755527	0.816602	0.953514	1	1982	tags=22%, list=18%, signal=27%
GO_NEGATIVE_REGULATION_OF_MUSCLE_CELL_APOPTOTIC_PROCESS	18	0.24595	0.754802	0.826347	0.954198	1	2967	tags=39%, list=27%, signal=53%
GO_PALLIUM_DEVELOPMENT	96	0.184203	0.754306	0.843023	0.954559	1	1999	tags=21%, list=18%, signal=25%
GO_SKIN_EPIDERMIS_DEVELOPMENT	38	0.238749	0.753872	0.82505	0.954795	1	1767	tags=26%, list=16%, signal=31%
GO_REGULATION_OF_NERVOUS_SYSTEM_DEVELOPMENT	411	0.163318	0.753781	0.898636	0.954453	1	2881	tags=28%, list=27%, signal=36%
GO_BETA_CATENIN_DESTRUCTION_COMPLEX_DISASSEMBLY	15	0.257558	0.753703	0.775829	0.954092	1	51	tags=7%, list=0%, signal=7%
GO_RESPONSE_TO_AMINO_ACID	61	0.18708	0.753678	0.842105	0.953638	1	2484	tags=26%, list=23%, signal=34%
GO_OVARIAN_FOLLICLE_DEVELOPMENT	35	0.205707	0.753575	0.832669	0.953317	1	2735	tags=29%, list=25%, signal=38%
GO_CHONDROITIN_SULFATE_PROTEOGLYCAN_METABOLIC_PROCESS	25	0.250192	0.753508	0.776892	0.952943	1	1163	tags=16%, list=11%, signal=18%
GO_CYTOSKELETON_DEPENDENT_CYTOKINESIS	27	0.238136	0.753445	0.743539	0.952541	1	4000	tags=48%, list=37%, signal=76%
GO_PROTEIN_DISULFIDE_OXIDOREDUCTASE_ACTIVITY	15	0.261047	0.752502	0.77	0.953559	1	1699	tags=20%, list=16%, signal=24%
GO_POSITIVE_REGULATION_OF_CALCIUM_ION_TRANSMEMBRANE_TRANSPORT	38	0.214002	0.75247	0.833333	0.953123	1	219	tags=8%, list=2%, signal=8%
GO_PRESYNAPTIC_PROCESS_INVOLVED_IN_SYNAPTIC_TRANSMISSION	56	0.195022	0.751946	0.876984	0.95343	1	2838	tags=34%, list=26%, signal=46%
GO_SYNAPSIS	19	0.254249	0.751849	0.768031	0.953098	1	2807	tags=42%, list=26%, signal=57%
GO_N_ACETYLTRANSFERASE_ACTIVITY	48	0.205719	0.751673	0.802372	0.952932	1	3629	tags=44%, list=34%, signal=66%
GO_METALLOEXOPEPTIDASE_ACTIVITY	26	0.218815	0.751425	0.857143	0.952866	1	1508	tags=19%, list=14%, signal=22%
GO_DOPAMINERGIC_NEURON_DIFFERENTIATION	17	0.26147	0.751174	0.823643	0.952788	1	1557	tags=24%, list=14%, signal=27%
GO_MODULATION_OF_EXCITATORY_POSTSYNAPTIC_POTENTIAL	18	0.250661	0.749209	0.815631	0.955459	1	2841	tags=39%, list=26%, signal=53%
GO_ANION_CHANNEL_ACTIVITY	44	0.20683	0.748997	0.847525	0.955269	1	3179	tags=34%, list=29%, signal=48%
GO_CELL_SUBSTRATE_ADHESION	99	0.192721	0.748967	0.805068	0.954832	1	3069	tags=33%, list=28%, signal=46%
GO_NEGATIVE_REGULATION_OF_ACTIN_FILAMENT_POLYMERIZATION	24	0.221433	0.748102	0.822222	0.955724	1	1336	tags=17%, list=12%, signal=19%
GO_NEGATIVE_REGULATION_OF_BINDING	90	0.169995	0.747245	0.90505	0.956604	1	2571	tags=23%, list=24%, signal=30%
GO_SECONDARY_ACTIVE_TRANSMEMBRANE_TRANSPORTER_ACTIVITY	119	0.176568	0.747144	0.907843	0.956288	1	2884	tags=27%, list=27%, signal=36%
GO_REGULATION_OF_CIRCADIAN_RHYTHM	58	0.187085	0.746866	0.863636	0.956206	1	3463	tags=36%, list=32%, signal=53%
GO_DETECTION_OF_BIOTIC_STIMULUS	17	0.28186	0.746098	0.740952	0.956945	1	2191	tags=35%, list=20%, signal=44%
GO_NUCLEAR_IMPORT	71	0.182637	0.745157	0.874752	0.957897	1	3273	tags=32%, list=30%, signal=46%
GO_NEUROMUSCULAR_SYNAPTIC_TRANSMISSION	19	0.234453	0.744847	0.807229	0.957887	1	1947	tags=26%, list=18%, signal=32%
GO_REGULATION_OF_CENTROSOME_CYCLE	25	0.24548	0.744629	0.767045	0.957766	1	4043	tags=44%, list=37%, signal=70%
GO_POSITIVE_REGULATION_OF_EXOCYTOSIS	41	0.21153	0.743728	0.850107	0.958697	1	1766	tags=20%, list=16%, signal=23%
GO_XENOPHAGY	62	0.176563	0.742243	0.898947	0.960583	1	2495	tags=23%, list=23%, signal=29%
GO_SNAP_RECEPTOR_ACTIVITY	21	0.231604	0.74221	0.796813	0.96014	1	2924	tags=38%, list=27%, signal=52%
GO_EMBRYONIC_HEART_TUBE_DEVELOPMENT	43	0.212615	0.742115	0.856287	0.959783	1	3781	tags=44%, list=35%, signal=68%
GO_REGULATION_OF_FIBROBLAST_GROWTH_FACTOR_RECEPTOR_SIGNALING_PATHWAY	18	0.248513	0.741855	0.804183	0.959683	1	1165	tags=17%, list=11%, signal=19%
GO_EXTRACELLULAR_MATRIX	241	0.205424	0.741792	0.755814	0.959274	1	2108	tags=24%, list=19%, signal=29%
GO_HEART_MORPHOGENESIS	139	0.18852	0.741494	0.875	0.959266	1	2651	tags=27%, list=24%, signal=36%
GO_ERYTHROCYTE_HOMEOSTASIS	49	0.191669	0.740804	0.882231	0.959835	1	2349	tags=29%, list=22%, signal=36%
GO_TISSUE_MORPHOGENESIS	306	0.166927	0.740395	0.907692	0.959988	1	2805	tags=27%, list=26%, signal=35%
GO_CONDENSED_NUCLEAR_CHROMOSOME	45	0.220526	0.740046	0.774257	0.960064	1	3040	tags=36%, list=28%, signal=49%
GO_NEURON_FATE_COMMITMENT	33	0.233126	0.739722	0.83237	0.960064	1	2387	tags=30%, list=22%, signal=39%
GO_STRIATED_MUSCLE_ADAPTATION	17	0.263315	0.739618	0.817073	0.959737	1	2763	tags=29%, list=26%, signal=39%
GO_PROTEIN_ACYLATION	97	0.172951	0.738492	0.876953	0.96096	1	3598	tags=36%, list=33%, signal=54%
GO_FORMATION_OF_PRIMARY_GERM_LAYER	66	0.193347	0.738377	0.859345	0.960649	1	1925	tags=21%, list=18%, signal=26%
GO_ENDOMEMBRANE_SYSTEM_ORGANIZATION	259	0.15078	0.738369	0.936382	0.960171	1	2903	tags=24%, list=27%, signal=32%
GO_RNA_POLYMERASE_II_TRANSCRIPTION_FACTOR_BINDING	55	0.189651	0.737185	0.860236	0.961472	1	3215	tags=33%, list=30%, signal=46%
GO_POSITIVE_REGULATION_OF_VIRAL_PROCESS	38	0.192743	0.73709	0.847107	0.961132	1	552	tags=8%, list=5%, signal=8%
GO_DNA_REPLICATION	114	0.21582	0.736657	0.714	0.961276	1	4304	tags=45%, list=40%, signal=73%
GO_SULFUR_COMPOUND_METABOLIC_PROCESS	195	0.164732	0.736439	0.934599	0.961098	1	3452	tags=33%, list=32%, signal=48%
GO_ZINC_II_ION_TRANSPORT	16	0.251436	0.735932	0.825726	0.961372	1	1812	tags=25%, list=17%, signal=30%
GO_RETROGRADE_VESICLE_MEDIATED_TRANSPORT_GOLGI_TO_ER	42	0.212429	0.735384	0.832258	0.961707	1	4718	tags=52%, list=44%, signal=92%
GO_PHOSPHOTRANSFERASE_ACTIVITY_PHOSPHATE_GROUP_AS_ACCEPTOR	25	0.210154	0.73536	0.852227	0.961255	1	1061	tags=16%, list=10%, signal=18%
GO_TUBE_DEVELOPMENT	329	0.165943	0.734638	0.907197	0.961843	1	1966	tags=19%, list=18%, signal=22%
GO_NUCLEUS_ORGANIZATION	77	0.181888	0.734574	0.869478	0.961452	1	3982	tags=42%, list=37%, signal=65%
GO_SYNTAXIN_BINDING	48	0.192594	0.734041	0.893145	0.961795	1	3081	tags=35%, list=28%, signal=49%
GO_E_BOX_BINDING	18	0.281593	0.733879	0.792	0.961532	1	1057	tags=22%, list=10%, signal=25%
GO_REGULATION_OF_BIOMINERAL_TISSUE_DEVELOPMENT	35	0.233765	0.733183	0.843462	0.962078	1	1982	tags=26%, list=18%, signal=31%
GO_REGULATION_OF_KIDNEY_DEVELOPMENT	26	0.226455	0.732997	0.85	0.961855	1	3273	tags=38%, list=30%, signal=55%
GO_INTEGRIN_BINDING	57	0.215313	0.732955	0.81323	0.961435	1	2780	tags=32%, list=26%, signal=42%
GO_REGULATION_OF_CELLULAR_RESPIRATION	15	0.257661	0.732417	0.809224	0.96175	1	3329	tags=40%, list=31%, signal=58%
GO_MEIOSIS_I	46	0.210335	0.732236	0.816956	0.961536	1	3007	tags=33%, list=28%, signal=45%
GO_CELLULAR_LIPID_CATABOLIC_PROCESS	95	0.185523	0.731503	0.876984	0.962122	1	3510	tags=33%, list=32%, signal=48%
GO_REGULATION_OF_PROTEIN_MATURATION	46	0.197102	0.730072	0.880903	0.963777	1	3700	tags=43%, list=34%, signal=66%
GO_NEGATIVE_REGULATION_OF_NEURON_DEATH	94	0.169905	0.729273	0.94499	0.964485	1	1787	tags=19%, list=17%, signal=23%
GO_REGULATION_OF_OXIDATIVE_STRESS_INDUCED_INTRINSIC_APOPTOTIC_SIGNALING_PATHWAY	16	0.236034	0.728314	0.816017	0.965388	1	2569	tags=25%, list=24%, signal=33%
GO_GDP_BINDING	31	0.233204	0.727889	0.785571	0.965522	1	959	tags=13%, list=9%, signal=14%
GO_REGULATION_OF_CELLULAR_KETONE_METABOLIC_PROCESS	105	0.169765	0.727459	0.912871	0.965681	1	2834	tags=27%, list=26%, signal=36%
GO_HEXOSE_METABOLIC_PROCESS	105	0.179444	0.726158	0.872428	0.967077	1	2516	tags=25%, list=23%, signal=32%
GO_HSP90_PROTEIN_BINDING	16	0.234861	0.72577	0.845545	0.96716	1	12	tags=6%, list=0%, signal=6%
GO_BONE_DEVELOPMENT	94	0.185141	0.725578	0.87931	0.966951	1	2461	tags=24%, list=23%, signal=31%
GO_HISTONE_DEACETYLASE_COMPLEX	37	0.195675	0.724589	0.877264	0.967856	1	2367	tags=24%, list=22%, signal=31%
[truncated: 294 more rows]

## Sheet: Low expression of STAT1
Table SI. GSEA Gene Ontology results. GSEA outcomes of the c2 (c2.all.v6.1.symbols.gmt) reference gene set for the key genes in the Janus kinase-signal transducer and activator of transcription signaling pathway in skin cutaneous melanoma. GSEA, gene set enrichment analysis. GSEA, gene set enrich analysis; GO, gene ontology; ES, enrichment score; NES, normalized enrichment score; NOM, nominal; FD…
Name	Size	ES	NES	NOM P-value	FDR q-value	FWER p-value	Rank to max	Leading Edge
GO_SMOOTHENED_SIGNALING_PATHWAY	38	-0.543216	-1.8619	0.00584795	1	0.774	1320	tags=42%, list=12%, signal=48%
GO_REGULATION_OF_VOLTAGE_GATED_CALCIUM_CHANNEL_ACTIVITY	18	-0.578581	-1.79677	0.00856531	1	0.911	3056	tags=56%, list=28%, signal=77%
GO_WNT_ACTIVATED_RECEPTOR_ACTIVITY	15	-0.662201	-1.77418	0.00642398	1	0.939	3027	tags=80%, list=28%, signal=111%
GO_POSITIVE_REGULATION_OF_AMINE_TRANSPORT	18	-0.60716	-1.75785	0.00623701	1	0.956	1578	tags=50%, list=15%, signal=58%
GO_CARDIAC_MUSCLE_CELL_ACTION_POTENTIAL	18	-0.612371	-1.72446	0.0194932	1	0.982	1077	tags=44%, list=10%, signal=49%
GO_INSULIN_RECEPTOR_SIGNALING_PATHWAY	53	-0.45223	-1.72094	0.0125261	1	0.983	2270	tags=32%, list=21%, signal=40%
GO_REGULATION_OF_MEIOTIC_NUCLEAR_DIVISION	16	-0.565631	-1.70437	0.0188679	1	0.985	2999	tags=50%, list=28%, signal=69%
GO_CRANIAL_NERVE_DEVELOPMENT	17	-0.588566	-1.70148	0.0137795	1	0.986	1048	tags=29%, list=10%, signal=33%
GO_NEGATIVE_REGULATION_OF_FIBROBLAST_PROLIFERATION	17	-0.576242	-1.69832	0.0197628	1	0.987	1798	tags=47%, list=17%, signal=56%
GO_POSITIVE_REGULATION_OF_CATION_CHANNEL_ACTIVITY	21	-0.527375	-1.67951	0.0102459	1	0.993	1763	tags=38%, list=16%, signal=45%
GO_PROTEIN_LOCALIZATION_TO_CILIUM	17	-0.564698	-1.66677	0.027451	1	0.996	1089	tags=47%, list=10%, signal=52%
GO_WNT_PROTEIN_BINDING	19	-0.58624	-1.66109	0.0210084	1	0.996	3171	tags=74%, list=29%, signal=104%
GO_CILIARY_BASE	16	-0.565641	-1.65733	0.0198807	1	0.996	1089	tags=44%, list=10%, signal=49%
GO_MITOCHONDRIAL_RESPIRATORY_CHAIN_COMPLEX_ASSEMBLY	46	-0.609065	-1.61376	0.0675676	1	0.998	2963	tags=70%, list=27%, signal=95%
GO_MITOCHONDRIAL_RESPIRATORY_CHAIN_COMPLEX_I_BIOGENESIS	39	-0.626303	-1.60889	0.0655106	1	0.998	3111	tags=74%, list=29%, signal=104%
GO_INSULIN_RECEPTOR_BINDING	18	-0.544029	-1.60841	0.0386847	1	0.998	258	tags=28%, list=2%, signal=28%
GO_NADH_DEHYDROGENASE_COMPLEX	31	-0.66162	-1.60102	0.0578035	1	0.998	2897	tags=74%, list=27%, signal=101%
GO_REGULATION_OF_MESENCHYMAL_CELL_PROLIFERATION	19	-0.552721	-1.59739	0.0204082	1	0.999	1739	tags=47%, list=16%, signal=56%
GO_SYNAPSE_ASSEMBLY	38	-0.488595	-1.59053	0.043299	1	0.999	1317	tags=32%, list=12%, signal=36%
GO_ENERGY_DERIVATION_BY_OXIDATION_OF_ORGANIC_COMPOUNDS	136	-0.433841	-1.5816	0.045283	1	0.999	3443	tags=56%, list=32%, signal=81%
GO_POSITIVE_REGULATION_OF_MESENCHYMAL_CELL_PROLIFERATION	17	-0.569822	-1.57716	0.0209644	1	1	1739	tags=53%, list=16%, signal=63%
GO_APICAL_JUNCTION_ASSEMBLY	16	-0.538595	-1.57396	0.0341365	1	1	2681	tags=44%, list=25%, signal=58%
GO_MULTI_ORGANISM_BEHAVIOR	42	-0.442597	-1.57297	0.0282258	1	1	1268	tags=31%, list=12%, signal=35%
GO_PRESYNAPTIC_ACTIVE_ZONE	16	-0.563809	-1.56074	0.0422535	1	1	1962	tags=56%, list=18%, signal=69%
GO_ACTION_POTENTIAL	46	-0.443073	-1.54862	0.0383065	1	1	1077	tags=24%, list=10%, signal=26%
GO_ENDOSOME_TO_LYSOSOME_TRANSPORT	25	-0.476481	-1.54155	0.0377734	1	1	1785	tags=40%, list=16%, signal=48%
GO_ELECTRON_TRANSPORT_CHAIN	59	-0.568165	-1.52653	0.0839844	1	1	2897	tags=64%, list=27%, signal=87%
GO_REPRODUCTIVE_BEHAVIOR	18	-0.50053	-1.5176	0.0576132	1	1	749	tags=28%, list=7%, signal=30%
GO_RIBOSOMAL_SUBUNIT	99	-0.538765	-1.51051	0.148221	1	1	3215	tags=70%, list=30%, signal=98%
GO_RIBOSOME	130	-0.488272	-1.50725	0.147287	1	1	3483	tags=65%, list=32%, signal=95%
GO_REGULATION_OF_HEART_RATE_BY_CARDIAC_CONDUCTION	19	-0.52968	-1.50541	0.0766045	1	1	1077	tags=37%, list=10%, signal=41%
GO_LARGE_RIBOSOMAL_SUBUNIT	60	-0.553698	-1.49402	0.157282	1	1	3215	tags=73%, list=30%, signal=104%
GO_PROTEIN_METHYLTRANSFERASE_ACTIVITY	39	-0.408281	-1.49246	0.0644531	1	1	1761	tags=33%, list=16%, signal=40%
GO_CYTOSOLIC_RIBOSOME	70	-0.571398	-1.48499	0.164384	1	1	3462	tags=79%, list=32%, signal=115%
GO_OXIDATIVE_PHOSPHORYLATION	51	-0.593216	-1.47355	0.115308	1	1	2897	tags=69%, list=27%, signal=93%
GO_INNER_MITOCHONDRIAL_MEMBRANE_PROTEIN_COMPLEX	66	-0.553529	-1.46906	0.129921	1	1	2897	tags=61%, list=27%, signal=82%
GO_NEUROMUSCULAR_JUNCTION_DEVELOPMENT	16	-0.466092	-1.46476	0.0636183	1	1	3021	tags=56%, list=28%, signal=78%
GO_OXIDOREDUCTASE_ACTIVITY_ACTING_ON_THE_ALDEHYDE_OR_OXO_GROUP_OF_DONORS_NAD_OR_NADP_AS_ACCEPTOR	23	-0.470377	-1.46476	0.059761	1	1	2207	tags=48%, list=20%, signal=60%
GO_NERVE_DEVELOPMENT	32	-0.435738	-1.46169	0.0542636	1	1	1819	tags=28%, list=17%, signal=34%
GO_STRUCTURAL_CONSTITUENT_OF_RIBOSOME	123	-0.482188	-1.46145	0.157171	1	1	3215	tags=66%, list=30%, signal=93%
GO_MITOCHONDRIAL_PROTEIN_COMPLEX	85	-0.512668	-1.46011	0.126233	1	1	2693	tags=54%, list=25%, signal=71%
GO_DELAYED_RECTIFIER_POTASSIUM_CHANNEL_ACTIVITY	18	-0.505162	-1.4558	0.083503	1	1	1625	tags=39%, list=15%, signal=46%
GO_TRANSFORMING_GROWTH_FACTOR_BETA_RECEPTOR_SIGNALING_PATHWAY	58	-0.375413	-1.44913	0.0704225	1	1	2840	tags=47%, list=26%, signal=63%
GO_ESTABLISHMENT_OF_PROTEIN_LOCALIZATION_TO_MEMBRANE	151	-0.384949	-1.44845	0.11753	1	1	2548	tags=46%, list=24%, signal=59%
GO_PROTEIN_TARGETING_TO_MEMBRANE	84	-0.478464	-1.44675	0.177062	1	1	2538	tags=56%, list=23%, signal=73%
GO_PYRIDOXAL_PHOSPHATE_BINDING	21	-0.494773	-1.44468	0.0742857	1	1	2606	tags=52%, list=24%, signal=69%
GO_SENSORY_PERCEPTION_OF_MECHANICAL_STIMULUS	80	-0.34036	-1.44342	0.0235756	1	1	1567	tags=28%, list=14%, signal=32%
GO_CYTOSOLIC_LARGE_RIBOSOMAL_SUBUNIT	37	-0.626414	-1.44046	0.184891	1	1	3321	tags=86%, list=31%, signal=124%
GO_SMALL_RIBOSOMAL_SUBUNIT	39	-0.530362	-1.43703	0.158416	1	1	3462	tags=72%, list=32%, signal=105%
GO_RECEPTOR_CLUSTERING	25	-0.42385	-1.4345	0.0687623	1	1	3536	tags=60%, list=33%, signal=89%
GO_PROTEIN_LOCALIZATION_TO_ENDOPLASMIC_RETICULUM	71	-0.519408	-1.43224	0.182186	1	1	3425	tags=73%, list=32%, signal=106%
GO_CELLULAR_RESPIRATION	87	-0.483397	-1.43034	0.136802	1	1	3443	tags=63%, list=32%, signal=92%
GO_WNT_SIGNALING_PATHWAY_CALCIUM_MODULATING_PATHWAY	24	-0.450186	-1.42895	0.078629	1	1	2098	tags=29%, list=19%, signal=36%
GO_POSITIVE_REGULATION_OF_MUSCLE_CONTRACTION	25	-0.444824	-1.42866	0.0717213	1	1	1428	tags=36%, list=13%, signal=41%
GO_PROTON_TRANSPORTING_TWO_SECTOR_ATPASE_COMPLEX	28	-0.520834	-1.42778	0.109804	1	1	3345	tags=57%, list=31%, signal=82%
GO_RNA_POLYADENYLATION	23	-0.478087	-1.42737	0.139216	1	1	2230	tags=48%, list=21%, signal=60%
GO_CYTOSOLIC_SMALL_RIBOSOMAL_SUBUNIT	27	-0.590995	-1.42374	0.163347	1	1	3462	tags=81%, list=32%, signal=119%
GO_EMBRYONIC_SKELETAL_SYSTEM_MORPHOGENESIS	60	-0.39087	-1.41886	0.0806452	1	1	1739	tags=33%, list=16%, signal=39%
GO_RIBOSOMAL_LARGE_SUBUNIT_ASSEMBLY	18	-0.558251	-1.41416	0.161165	1	1	2699	tags=50%, list=25%, signal=66%
GO_PROTEIN_LOCALIZATION_TO_MEMBRANE	221	-0.326095	-1.41346	0.114398	1	1	2548	tags=41%, list=24%, signal=52%
GO_RESPIRATORY_CHAIN	55	-0.538977	-1.41324	0.162055	1	1	2897	tags=65%, list=27%, signal=89%
GO_POSITIVE_REGULATION_OF_PEPTIDYL_THREONINE_PHOSPHORYLATION	15	-0.488426	-1.41275	0.0785563	1	1	1334	tags=27%, list=12%, signal=30%
GO_OXIDOREDUCTASE_ACTIVITY_ACTING_ON_NAD_P_H_QUINONE_OR_SIMILAR_COMPOUND_AS_ACCEPTOR	37	-0.525969	-1.40881	0.146718	1	1	2897	tags=65%, list=27%, signal=88%
GO_RRNA_BINDING	32	-0.479673	-1.40632	0.151923	1	1	3180	tags=63%, list=29%, signal=88%
GO_PHAGOSOME_ACIDIFICATION	16	-0.522301	-1.40417	0.127451	1	1	2792	tags=50%, list=26%, signal=67%
GO_ESTABLISHMENT_OF_PROTEIN_LOCALIZATION_TO_ENDOPLASMIC_RETICULUM	62	-0.561315	-1.40311	0.186858	1	1	3425	tags=81%, list=32%, signal=117%
GO_REGULATION_OF_MITOPHAGY	27	-0.42012	-1.39784	0.111524	1	1	1478	tags=33%, list=14%, signal=39%
GO_REGULATION_OF_PROTEIN_PHOSPHATASE_TYPE_2A_ACTIVITY	17	-0.46261	-1.39511	0.0940695	1	1	2190	tags=41%, list=20%, signal=52%
GO_PROTEIN_TARGETING_TO_MITOCHONDRION	34	-0.502553	-1.39288	0.14717	1	1	2669	tags=47%, list=25%, signal=62%
GO_CALCIUM_DEPENDENT_CELL_CELL_ADHESION_VIA_PLASMA_MEMBRANE_CELL_ADHESION_MOLECULES	17	-0.527029	-1.39274	0.139918	1	1	1425	tags=41%, list=13%, signal=47%
GO_REGULATION_OF_ANION_TRANSMEMBRANE_TRANSPORT	17	-0.461579	-1.3877	0.0957031	1	1	995	tags=29%, list=9%, signal=32%
GO_OXIDOREDUCTASE_COMPLEX	65	-0.433232	-1.38743	0.165029	1	1	2897	tags=51%, list=27%, signal=69%
GO_NEGATIVE_REGULATION_OF_RESPONSE_TO_EXTRACELLULAR_STIMULUS	19	-0.446899	-1.38577	0.0800745	1	1	1578	tags=37%, list=15%, signal=43%
GO_HYDROGEN_PEROXIDE_METABOLIC_PROCESS	20	-0.4644	-1.38057	0.112205	1	1	2138	tags=45%, list=20%, signal=56%
GO_CARBON_OXYGEN_LYASE_ACTIVITY	35	-0.408965	-1.38046	0.0967118	1	1	1624	tags=37%, list=15%, signal=44%
GO_REGULATION_OF_RESPONSE_TO_EXTRACELLULAR_STIMULUS	103	-0.325089	-1.37901	0.0615385	1	1	1684	tags=27%, list=16%, signal=32%
GO_N_METHYLTRANSFERASE_ACTIVITY	39	-0.376372	-1.3772	0.114786	1	1	1761	tags=33%, list=16%, signal=40%
GO_PROTEIN_TARGETING	227	-0.321929	-1.37368	0.11284	1	1	2699	tags=39%, list=25%, signal=51%
GO_ENERGY_RESERVE_METABOLIC_PROCESS	48	-0.340076	-1.37282	0.0685484	1	1	3626	tags=48%, list=33%, signal=72%
GO_SKELETAL_SYSTEM_MORPHOGENESIS	118	-0.341222	-1.37281	0.0901639	1	1	2297	tags=34%, list=21%, signal=43%
GO_NUCLEAR_TRANSCRIBED_MRNA_CATABOLIC_PROCESS_NONSENSE_MEDIATED_DECAY	75	-0.49633	-1.37062	0.205479	1	1	3035	tags=65%, list=28%, signal=90%
GO_PHOTORECEPTOR_CONNECTING_CILIUM	19	-0.454377	-1.36873	0.113949	1	1	1089	tags=26%, list=10%, signal=29%
GO_POSITIVE_REGULATION_OF_DEPHOSPHORYLATION	28	-0.395613	-1.36446	0.0995851	1	1	1188	tags=29%, list=11%, signal=32%
GO_CYCLIC_NUCLEOTIDE_BINDING	17	-0.452356	-1.36285	0.127135	1	1	922	tags=29%, list=9%, signal=32%
GO_ESTABLISHMENT_OF_PROTEIN_LOCALIZATION_TO_ORGANELLE	211	-0.331393	-1.35995	0.138132	1	1	2699	tags=40%, list=25%, signal=53%
GO_MITOCHONDRIAL_TRANSMEMBRANE_TRANSPORT	32	-0.478737	-1.35558	0.166987	1	1	2669	tags=44%, list=25%, signal=58%
GO_PHOSPHATIDYLINOSITOL_3_PHOSPHATE_BINDING	17	-0.451305	-1.35476	0.121622	1	1	1632	tags=29%, list=15%, signal=35%
GO_REGULATION_OF_MEIOTIC_CELL_CYCLE	25	-0.412039	-1.35399	0.0969072	1	1	2999	tags=48%, list=28%, signal=66%
GO_POSITIVE_REGULATION_OF_ANION_TRANSPORT	34	-0.384472	-1.35311	0.0869565	1	1	1578	tags=38%, list=15%, signal=45%
GO_EMBRYONIC_DIGIT_MORPHOGENESIS	32	-0.422162	-1.35309	0.115854	1	1	1936	tags=38%, list=18%, signal=46%
GO_LYSINE_N_METHYLTRANSFERASE_ACTIVITY	25	-0.417015	-1.34683	0.141473	1	1	1756	tags=36%, list=16%, signal=43%
GO_NEURAL_NUCLEUS_DEVELOPMENT	31	-0.394166	-1.34489	0.128599	1	1	3174	tags=45%, list=29%, signal=64%
GO_LYSOSOMAL_TRANSPORT	40	-0.390771	-1.34463	0.117878	1	1	2750	tags=43%, list=25%, signal=57%
GO_TRANSLATIONAL_INITIATION	88	-0.490077	-1.34365	0.260521	1	1	3454	tags=69%, list=32%, signal=101%
GO_NEGATIVE_REGULATION_OF_WNT_SIGNALING_PATHWAY	114	-0.314956	-1.34266	0.0974155	1	1	1669	tags=25%, list=15%, signal=30%
GO_CILIARY_TIP	30	-0.438571	-1.33925	0.146199	1	1	2391	tags=43%, list=22%, signal=55%
GO_POSITIVE_REGULATION_OF_GLUCOSE_METABOLIC_PROCESS	20	-0.432922	-1.33827	0.107784	1	1	622	tags=20%, list=6%, signal=21%
GO_POTASSIUM_CHANNEL_COMPLEX	52	-0.370138	-1.32672	0.106855	1	1	1674	tags=31%, list=15%, signal=36%
GO_MITOCHONDRIAL_MEMBRANE_PART	104	-0.439333	-1.32594	0.215686	1	1	2897	tags=50%, list=27%, signal=68%
GO_PROTEIN_TRANSMEMBRANE_TRANSPORT	32	-0.420387	-1.32339	0.172211	1	1	2669	tags=47%, list=25%, signal=62%
GO_MEMBRANE_DEPOLARIZATION	31	-0.377512	-1.32325	0.129555	1	1	1077	tags=23%, list=10%, signal=25%
GO_REGULATION_OF_PEPTIDYL_THREONINE_PHOSPHORYLATION	22	-0.41346	-1.32164	0.1258	1	1	1632	tags=32%, list=15%, signal=37%
GO_MLL1_2_COMPLEX	16	-0.520167	-1.32162	0.179688	1	1	2709	tags=56%, list=25%, signal=75%
GO_PHOSPHATIDYLINOSITOL_BIOSYNTHETIC_PROCESS	64	-0.327311	-1.31901	0.114723	1	1	2167	tags=30%, list=20%, signal=37%
GO_REGULATION_OF_MEMBRANE_REPOLARIZATION	18	-0.433709	-1.31894	0.143725	1	1	1339	tags=39%, list=12%, signal=44%
GO_POSITIVE_REGULATION_OF_DNA_BINDING	23	-0.396835	-1.3187	0.135827	1	1	1533	tags=35%, list=14%, signal=40%
GO_PROTEIN_PHOSPHATASE_2A_BINDING	17	-0.40784	-1.31747	0.126273	1	1	2017	tags=29%, list=19%, signal=36%
GO_REGULATION_OF_NEUROTRANSMITTER_SECRETION	26	-0.394413	-1.31438	0.146138	1	1	1781	tags=31%, list=16%, signal=37%
GO_ATP_HYDROLYSIS_COUPLED_TRANSMEMBRANE_TRANSPORT	20	-0.464334	-1.3075	0.179134	1	1	3345	tags=55%, list=31%, signal=79%
GO_SUBSTANTIA_NIGRA_DEVELOPMENT	22	-0.420421	-1.30453	0.165354	1	1	2948	tags=41%, list=27%, signal=56%
GO_SYNAPSE_ORGANIZATION	79	-0.338416	-1.30417	0.120763	1	1	2182	tags=29%, list=20%, signal=36%
GO_INTRACILIARY_TRANSPORT_PARTICLE	20	-0.485507	-1.29797	0.188976	1	1	2724	tags=50%, list=25%, signal=67%
GO_BODY_MORPHOGENESIS	26	-0.401802	-1.29084	0.160164	1	1	3765	tags=54%, list=35%, signal=82%
GO_CARTILAGE_DEVELOPMENT	90	-0.334846	-1.28766	0.166324	1	1	2035	tags=30%, list=19%, signal=37%
GO_GLUCAN_METABOLIC_PROCESS	41	-0.32734	-1.28762	0.113725	1	1	3626	tags=49%, list=33%, signal=73%
GO_HYDRO_LYASE_ACTIVITY	25	-0.412005	-1.28668	0.150794	1	1	1624	tags=40%, list=15%, signal=47%
GO_PROTEIN_LOCALIZATION_TO_MITOCHONDRION	45	-0.425414	-1.28547	0.245283	1	1	2669	tags=42%, list=25%, signal=56%
GO_POLYSOME	21	-0.457886	-1.28497	0.189024	1	1	2586	tags=48%, list=24%, signal=62%
GO_PROXIMAL_DISTAL_PATTERN_FORMATION	23	-0.443114	-1.2797	0.190871	1	1	1299	tags=35%, list=12%, signal=39%
GO_REGULATION_OF_GLUCOSE_IMPORT	36	-0.351587	-1.2788	0.145129	1	1	2803	tags=39%, list=26%, signal=52%
GO_DORSAL_VENTRAL_PATTERN_FORMATION	57	-0.358212	-1.27849	0.148	1	1	1840	tags=32%, list=17%, signal=38%
GO_POSITIVE_REGULATION_OF_ORGANIC_ACID_TRANSPORT	20	-0.41051	-1.27792	0.152805	1	1	1578	tags=40%, list=15%, signal=47%
GO_EAR_MORPHOGENESIS	66	-0.341491	-1.27757	0.163934	1	1	1743	tags=27%, list=16%, signal=32%
GO_WALKING_BEHAVIOR	20	-0.413075	-1.27713	0.170923	1	1	2830	tags=55%, list=26%, signal=74%
GO_OSSIFICATION	155	-0.302388	-1.27521	0.123667	1	1	1786	tags=28%, list=16%, signal=34%
GO_REGULATION_OF_GLYCOGEN_METABOLIC_PROCESS	19	-0.416119	-1.2749	0.172962	1	1	1471	tags=32%, list=14%, signal=36%
GO_CHANNEL_INHIBITOR_ACTIVITY	23	-0.397077	-1.27392	0.15547	1	1	1730	tags=35%, list=16%, signal=41%
GO_EMBRYONIC_SKELETAL_SYSTEM_DEVELOPMENT	79	-0.342419	-1.27159	0.160164	1	1	1863	tags=33%, list=17%, signal=39%
GO_CELLULAR_RESPONSE_TO_INSULIN_STIMULUS	91	-0.304615	-1.2706	0.152	1	1	2796	tags=31%, list=26%, signal=41%
GO_REGULATION_OF_MEMBRANE_DEPOLARIZATION	24	-0.388756	-1.26999	0.146045	1	1	1630	tags=33%, list=15%, signal=39%
GO_OXIDOREDUCTASE_ACTIVITY_ACTING_ON_THE_ALDEHYDE_OR_OXO_GROUP_OF_DONORS	30	-0.38182	-1.26624	0.160156	1	1	2460	tags=43%, list=23%, signal=56%
GO_REGULATION_OF_CATENIN_IMPORT_INTO_NUCLEUS	21	-0.405679	-1.26509	0.178112	1	1	3027	tags=48%, list=28%, signal=66%
GO_POSITIVE_REGULATION_OF_STEM_CELL_PROLIFERATION	37	-0.36203	-1.2642	0.140426	1	1	1359	tags=27%, list=13%, signal=31%
GO_CYTOSOLIC_PART	127	-0.372492	-1.26235	0.274854	1	1	2620	tags=46%, list=24%, signal=60%
GO_HINDBRAIN_MORPHOGENESIS	25	-0.387662	-1.25661	0.194726	1	1	577	tags=24%, list=5%, signal=25%
GO_PHAGOSOME_MATURATION	23	-0.408304	-1.25518	0.194672	1	1	2792	tags=43%, list=26%, signal=58%
GO_AROMATIC_AMINO_ACID_FAMILY_METABOLIC_PROCESS	16	-0.445499	-1.25351	0.19295	1	1	1419	tags=25%, list=13%, signal=29%
GO_AXON_EXTENSION	21	-0.423443	-1.25242	0.186747	1	1	1631	tags=33%, list=15%, signal=39%
GO_COCHLEA_DEVELOPMENT	23	-0.404478	-1.25239	0.181818	1	1	1152	tags=26%, list=11%, signal=29%
GO_NEGATIVE_REGULATION_OF_EPITHELIAL_CELL_MIGRATION	21	-0.393668	-1.25187	0.183505	1	1	1977	tags=38%, list=18%, signal=47%
GO_POSITIVE_REGULATION_OF_GLUCOSE_TRANSPORT	23	-0.393466	-1.25108	0.193814	1	1	442	tags=17%, list=4%, signal=18%
GO_NEGATIVE_REGULATION_OF_STEM_CELL_DIFFERENTIATION	27	-0.369617	-1.24975	0.178218	1	1	2496	tags=41%, list=23%, signal=53%
GO_GENERATION_OF_PRECURSOR_METABOLITES_AND_ENERGY	178	-0.33516	-1.2484	0.213178	1	1	3542	tags=52%, list=33%, signal=76%
GO_HEAD_MORPHOGENESIS	20	-0.416657	-1.24755	0.202559	1	1	2901	tags=40%, list=27%, signal=55%
GO_REGULATION_OF_NEURON_MIGRATION	16	-0.431547	-1.24561	0.209073	1	1	751	tags=31%, list=7%, signal=34%
GO_REGULATION_OF_SYNAPTIC_TRANSMISSION_GLUTAMATERGIC	27	-0.388416	-1.24408	0.1893	1	1	1270	tags=30%, list=12%, signal=33%
GO_INTRASPECIES_INTERACTION_BETWEEN_ORGANISMS	27	-0.398694	-1.24322	0.188755	1	1	1268	tags=30%, list=12%, signal=33%
GO_REGULATION_OF_INTRACELLULAR_STEROID_HORMONE_RECEPTOR_SIGNALING_PATHWAY	35	-0.347455	-1.2427	0.19305	1	1	2708	tags=43%, list=25%, signal=57%
GO_ROUGH_ENDOPLASMIC_RETICULUM	37	-0.355233	-1.23861	0.189293	1	1	3682	tags=49%, list=34%, signal=73%
GO_CELL_FATE_SPECIFICATION	34	-0.379788	-1.23844	0.179752	1	1	1320	tags=41%, list=12%, signal=47%
GO_REGULATION_OF_CANONICAL_WNT_SIGNALING_PATHWAY	133	-0.274734	-1.23667	0.144814	1	1	1600	tags=24%, list=15%, signal=28%
GO_OXIDOREDUCTASE_ACTIVITY_ACTING_ON_NAD_P_H	60	-0.387449	-1.23612	0.242248	1	1	2897	tags=50%, list=27%, signal=68%
GO_PRESYNAPTIC_MEMBRANE	29	-0.368083	-1.23599	0.165703	1	1	1296	tags=31%, list=12%, signal=35%
GO_REGULATION_OF_RESPONSE_TO_REACTIVE_OXYGEN_SPECIES	18	-0.413006	-1.23562	0.191033	1	1	2939	tags=50%, list=27%, signal=69%
GO_COFACTOR_BINDING	140	-0.306588	-1.2351	0.193798	1	1	2716	tags=38%, list=25%, signal=50%
GO_MEMBRANE_DEPOLARIZATION_DURING_ACTION_POTENTIAL	20	-0.41129	-1.23116	0.20122	1	1	1077	tags=25%, list=10%, signal=28%
GO_REGULATION_OF_VASCULAR_PERMEABILITY	18	-0.415201	-1.23109	0.208502	1	1	1334	tags=28%, list=12%, signal=32%
GO_RELEASE_OF_CYTOCHROME_C_FROM_MITOCHONDRIA	15	-0.457657	-1.22974	0.245059	1	1	1646	tags=40%, list=15%, signal=47%
GO_CARDIAC_ATRIUM_DEVELOPMENT	17	-0.418399	-1.22653	0.211881	1	1	1600	tags=35%, list=15%, signal=41%
GO_CENTRAL_NERVOUS_SYSTEM_NEURON_AXONOGENESIS	15	-0.448526	-1.224	0.25102	1	1	1971	tags=40%, list=18%, signal=49%
GO_CELLULAR_IRON_ION_HOMEOSTASIS	23	-0.387862	-1.21707	0.21	1	1	1385	tags=26%, list=13%, signal=30%
GO_REGULATION_OF_EXECUTION_PHASE_OF_APOPTOSIS	18	-0.398158	-1.2147	0.220833	1	1	1646	tags=39%, list=15%, signal=46%
GO_LYASE_ACTIVITY	90	-0.288627	-1.21458	0.177866	1	1	1624	tags=29%, list=15%, signal=34%
GO_CAMP_MEDIATED_SIGNALING	24	-0.375924	-1.21196	0.21374	1	1	1166	tags=25%, list=11%, signal=28%
GO_NEGATIVE_REGULATION_OF_DNA_REPLICATION	24	-0.388546	-1.21074	0.234694	1	1	3140	tags=42%, list=29%, signal=59%
GO_TRANSMITTER_GATED_CHANNEL_ACTIVITY	18	-0.414282	-1.20951	0.213251	1	1	255	tags=22%, list=2%, signal=23%
GO_ENSHEATHMENT_OF_NEURONS	50	-0.310464	-1.20525	0.211268	1	1	2329	tags=36%, list=22%, signal=46%
GO_REGULATION_OF_POLYSACCHARIDE_METABOLIC_PROCESS	23	-0.363932	-1.20362	0.223062	1	1	1471	tags=26%, list=14%, signal=30%
GO_NEURAL_RETINA_DEVELOPMENT	27	-0.357107	-1.20199	0.212724	1	1	403	tags=15%, list=4%, signal=15%
GO_REGULATION_OF_SODIUM_ION_TRANSMEMBRANE_TRANSPORTER_ACTIVITY	17	-0.402616	-1.20098	0.213018	1	1	1282	tags=24%, list=12%, signal=27%
GO_PH_REDUCTION	22	-0.426896	-1.19835	0.276392	1	1	3524	tags=50%, list=33%, signal=74%
GO_RIBONUCLEOPROTEIN_COMPLEX_SUBUNIT_ORGANIZATION	107	-0.335764	-1.18859	0.279612	1	1	3529	tags=51%, list=33%, signal=76%
GO_PROTEIN_ALKYLATION	56	-0.312863	-1.18531	0.234252	1	1	1761	tags=25%, list=16%, signal=30%
GO_ORGANELLE_INNER_MEMBRANE	286	-0.332555	-1.18514	0.289941	1	1	3180	tags=45%, list=29%, signal=63%
GO_NEURON_PROJECTION_GUIDANCE	108	-0.296996	-1.18387	0.221116	1	1	1899	tags=28%, list=18%, signal=33%
GO_DENDRITE_MORPHOGENESIS	22	-0.379113	-1.181	0.226378	1	1	2004	tags=27%, list=19%, signal=33%
GO_LOCOMOTORY_BEHAVIOR	109	-0.281322	-1.17991	0.197959	1	1	1603	tags=24%, list=15%, signal=28%
GO_COENZYME_BINDING	100	-0.304834	-1.17916	0.236791	1	1	2716	tags=38%, list=25%, signal=50%
GO_CELLULAR_PROTEIN_COMPLEX_ASSEMBLY	191	-0.260709	-1.17792	0.231373	1	1	3235	tags=42%, list=30%, signal=59%
GO_SCHWANN_CELL_DIFFERENTIATION	18	-0.398319	-1.17744	0.266145	1	1	2837	tags=44%, list=26%, signal=60%
GO_REGULATION_OF_HEART_RATE	49	-0.320813	-1.17382	0.217923	1	1	1339	tags=24%, list=12%, signal=28%
GO_CHONDROCYTE_DIFFERENTIATION	37	-0.357382	-1.1717	0.261603	1	1	2035	tags=35%, list=19%, signal=43%
GO_NUCLEOSIDE_MONOPHOSPHATE_METABOLIC_PROCESS	141	-0.330452	-1.16752	0.305447	1	1	2897	tags=45%, list=27%, signal=60%
GO_PROTEIN_LOCALIZATION_TO_ORGANELLE	311	-0.254581	-1.1646	0.238835	1	1	2699	tags=33%, list=25%, signal=43%
GO_PEPTIDYL_LYSINE_METHYLATION	35	-0.349269	-1.16297	0.257143	1	1	1756	tags=29%, list=16%, signal=34%
GO_REGULATION_OF_ORGAN_GROWTH	48	-0.318046	-1.16198	0.213675	1	1	1899	tags=33%, list=18%, signal=40%
GO_INTRACELLULAR_PROTEIN_TRANSPORT	447	-0.233822	-1.16154	0.204159	1	1	2868	tags=34%, list=26%, signal=44%
GO_TERMINAL_BOUTON	34	-0.337971	-1.16085	0.198853	1	1	684	tags=18%, list=6%, signal=19%
GO_ENDOCHONDRAL_BONE_MORPHOGENESIS	27	-0.362165	-1.15978	0.256729	1	1	1786	tags=33%, list=16%, signal=40%
GO_ACTIVATING_TRANSCRIPTION_FACTOR_BINDING	30	-0.333373	-1.15864	0.257874	1	1	973	tags=17%, list=9%, signal=18%
GO_ATPASE_ACTIVITY_COUPLED_TO_TRANSMEMBRANE_MOVEMENT_OF_IONS_PHOSPHORYLATIVE_MECHANISM	17	-0.387868	-1.15708	0.284569	1	1	1247	tags=24%, list=12%, signal=27%
GO_NAD_BINDING	37	-0.360945	-1.15697	0.285714	1	1	1809	tags=38%, list=17%, signal=45%
GO_PEPTIDE_METABOLIC_PROCESS	315	-0.294959	-1.1568	0.298851	1	1	3298	tags=47%, list=30%, signal=66%
GO_REGULATION_OF_WNT_SIGNALING_PATHWAY	182	-0.25015	-1.15598	0.213573	1	1	1812	tags=24%, list=17%, signal=29%
GO_REGULATION_OF_STEM_CELL_DIFFERENTIATION	68	-0.289956	-1.15502	0.252466	1	1	2496	tags=37%, list=23%, signal=47%
GO_REGULATION_OF_SYNAPTIC_VESICLE_TRANSPORT	16	-0.394943	-1.153	0.29899	1	1	3319	tags=50%, list=31%, signal=72%
GO_SH3_SH2_ADAPTOR_ACTIVITY	22	-0.362502	-1.15228	0.279835	1	1	605	tags=23%, list=6%, signal=24%
GO_OXIDOREDUCTASE_ACTIVITY_ACTING_ON_PEROXIDE_AS_ACCEPTOR	18	-0.402852	-1.15143	0.292398	1	1	3774	tags=61%, list=35%, signal=94%
GO_ATP_BIOSYNTHETIC_PROCESS	18	-0.456286	-1.15105	0.320792	1	1	3290	tags=56%, list=30%, signal=80%
GO_ASPARTATE_FAMILY_AMINO_ACID_METABOLIC_PROCESS	33	-0.325826	-1.14995	0.255906	1	1	1555	tags=24%, list=14%, signal=28%
GO_NEGATIVE_REGULATION_OF_EPITHELIAL_TO_MESENCHYMAL_TRANSITION	16	-0.37949	-1.14876	0.310606	1	1	2496	tags=44%, list=23%, signal=57%
GO_GLUTAMATE_RECEPTOR_SIGNALING_PATHWAY	27	-0.355732	-1.14858	0.271222	1	1	684	tags=22%, list=6%, signal=24%
GO_PHOSPHOLIPID_BIOSYNTHETIC_PROCESS	132	-0.254837	-1.14808	0.232465	1	1	1896	tags=23%, list=18%, signal=28%
GO_RIBOSOME_ASSEMBLY	35	-0.423826	-1.14462	0.344106	1	1	2699	tags=43%, list=25%, signal=57%
GO_POSITIVE_REGULATION_OF_EPITHELIAL_TO_MESENCHYMAL_TRANSITION	24	-0.355916	-1.14387	0.286573	1	1	1566	tags=33%, list=14%, signal=39%
GO_NEGATIVE_REGULATION_OF_CATION_CHANNEL_ACTIVITY	16	-0.379625	-1.14309	0.270613	1	1	2562	tags=44%, list=24%, signal=57%
GO_ORGANELLAR_RIBOSOME	41	-0.404364	-1.14306	0.361905	1	1	3272	tags=54%, list=30%, signal=77%
GO_MITOCHONDRIAL_TRANSPORT	97	-0.305017	-1.13859	0.301498	1	1	2691	tags=35%, list=25%, signal=46%
GO_POLYOL_BIOSYNTHETIC_PROCESS	16	-0.408893	-1.13859	0.295499	1	1	1218	tags=38%, list=11%, signal=42%
GO_ADULT_LOCOMOTORY_BEHAVIOR	50	-0.303626	-1.13829	0.274747	1	1	3056	tags=46%, list=28%, signal=64%
GO_TRANSLATIONAL_TERMINATION	52	-0.380266	-1.13796	0.35619	1	1	3283	tags=52%, list=30%, signal=74%
GO_MULTI_ORGANISM_METABOLIC_PROCESS	87	-0.394413	-1.13784	0.369781	1	1	3425	tags=61%, list=32%, signal=88%
GO_REGULATION_OF_AUTOPHAGY	144	-0.25361	-1.1377	0.257669	1	1	1698	tags=23%, list=16%, signal=27%
GO_REGULATION_OF_INTRACELLULAR_ESTROGEN_RECEPTOR_SIGNALING_PATHWAY	16	-0.384479	-1.13767	0.308448	1	1	2247	tags=38%, list=21%, signal=47%
GO_METAL_CLUSTER_BINDING	41	-0.342715	-1.13726	0.314991	1	1	3259	tags=46%, list=30%, signal=66%
GO_PROTEIN_STABILIZATION	78	-0.271908	-1.1366	0.25498	1	1	1438	tags=19%, list=13%, signal=22%
GO_NEGATIVE_REGULATION_OF_CANONICAL_WNT_SIGNALING_PATHWAY	91	-0.27361	-1.13629	0.262948	1	1	1600	tags=23%, list=15%, signal=27%
GO_PERIPHERAL_NERVOUS_SYSTEM_DEVELOPMENT	37	-0.322553	-1.13555	0.263158	1	1	2329	tags=35%, list=22%, signal=45%
GO_REGULATION_OF_CARDIAC_MUSCLE_CELL_PROLIFERATION	18	-0.387829	-1.13527	0.27439	1	1	1739	tags=33%, list=16%, signal=40%
GO_ORGANOPHOSPHATE_BIOSYNTHETIC_PROCESS	242	-0.236971	-1.13493	0.23374	1	1	2167	tags=25%, list=20%, signal=30%
GO_REGULATION_OF_MEMBRANE_POTENTIAL	187	-0.243366	-1.13464	0.229167	1	1	2138	tags=27%, list=20%, signal=33%
GO_RECEPTOR_ACTIVATOR_ACTIVITY	16	-0.367672	-1.13426	0.298354	1	1	1936	tags=38%, list=18%, signal=46%
GO_ORGANELLAR_LARGE_RIBOSOMAL_SUBUNIT	21	-0.435658	-1.13366	0.364683	1	1	3073	tags=57%, list=28%, signal=80%
GO_OXIDOREDUCTASE_ACTIVITY_ACTING_ON_THE_CH_CH_GROUP_OF_DONORS	31	-0.33785	-1.13184	0.298039	1	1	2374	tags=39%, list=22%, signal=49%
GO_CILIARY_PLASM	50	-0.336406	-1.13154	0.293413	1	1	2390	tags=42%, list=22%, signal=54%
GO_GLUCAN_BIOSYNTHETIC_PROCESS	16	-0.377929	-1.13031	0.289421	1	1	865	tags=25%, list=8%, signal=27%
GO_MITOCHONDRION_LOCALIZATION	20	-0.34971	-1.12921	0.289109	1	1	2232	tags=35%, list=21%, signal=44%
GO_GLUTAMATE_RECEPTOR_ACTIVITY	19	-0.392284	-1.12844	0.315464	1	1	476	tags=26%, list=4%, signal=27%
GO_MIDBRAIN_DEVELOPMENT	53	-0.286118	-1.12838	0.26875	1	1	3027	tags=40%, list=28%, signal=55%
GO_NEURAL_TUBE_PATTERNING	24	-0.368494	-1.1273	0.309381	1	1	1743	tags=33%, list=16%, signal=40%
GO_REGULATION_OF_TELOMERE_MAINTENANCE	36	-0.334661	-1.12668	0.318725	1	1	1283	tags=22%, list=12%, signal=25%
GO_CYTOPLASMIC_TRANSLATION	26	-0.418475	-1.12447	0.365049	1	1	2982	tags=50%, list=28%, signal=69%
GO_OSTEOBLAST_DIFFERENTIATION	84	-0.275563	-1.12401	0.285132	1	1	1507	tags=25%, list=14%, signal=29%
GO_POSITIVE_REGULATION_OF_CALCIUM_ION_TRANSMEMBRANE_TRANSPORTER_ACTIVITY	20	-0.360918	-1.12313	0.3	1	1	2948	tags=45%, list=27%, signal=62%
GO_WW_DOMAIN_BINDING	18	-0.381375	-1.1229	0.310204	1	1	531	tags=22%, list=5%, signal=23%
GO_NEGATIVE_REGULATION_OF_RNA_SPLICING	16	-0.407392	-1.12285	0.308943	1	1	2675	tags=50%, list=25%, signal=66%
GO_BRAIN_MORPHOGENESIS	21	-0.354929	-1.12201	0.288703	1	1	2837	tags=48%, list=26%, signal=64%
GO_CEREBRAL_CORTEX_RADIALLY_ORIENTED_CELL_MIGRATION	15	-0.402999	-1.12104	0.312749	1	1	3663	tags=67%, list=34%, signal=101%
GO_RNA_CATABOLIC_PROCESS	136	-0.320075	-1.12052	0.336538	1	1	2531	tags=41%, list=23%, signal=53%
GO_MONOVALENT_INORGANIC_CATION_TRANSMEMBRANE_TRANSPORTER_ACTIVITY	190	-0.2491	-1.11919	0.25	1	1	1711	tags=25%, list=16%, signal=29%
GO_FOREBRAIN_CELL_MIGRATION	32	-0.348642	-1.11698	0.325866	1	1	3003	tags=50%, list=28%, signal=69%
GO_CELLULAR_CARBOHYDRATE_CATABOLIC_PROCESS	22	-0.34094	-1.1167	0.306513	1	1	3413	tags=50%, list=32%, signal=73%
GO_REGULATION_OF_POSTSYNAPTIC_MEMBRANE_POTENTIAL	32	-0.322704	-1.11424	0.302128	1	1	802	tags=19%, list=7%, signal=20%
GO_SCAFFOLD_PROTEIN_BINDING	30	-0.319032	-1.11403	0.302554	1	1	1268	tags=20%, list=12%, signal=23%
GO_CILIARY_BASAL_BODY	41	-0.325339	-1.11248	0.307847	1	1	1442	tags=24%, list=13%, signal=28%
GO_PHOSPHOLIPASE_C_ACTIVITY	19	-0.382001	-1.11203	0.325956	1	1	454	tags=16%, list=4%, signal=16%
GO_TRANSFERASE_ACTIVITY_TRANSFERRING_ALKYL_OR_ARYL_OTHER_THAN_METHYL_GROUPS	30	-0.327345	-1.11187	0.301136	1	1	541	tags=17%, list=5%, signal=17%
GO_POSITIVE_REGULATION_OF_MITOCHONDRIAL_OUTER_MEMBRANE_PERMEABILIZATION_INVOLVED_IN_APOPTOTIC_SIGNALING_PATHWAY	18	-0.386028	-1.11105	0.347826	1	1	3755	tags=56%, list=35%, signal=85%
GO_RIBOSOMAL_LARGE_SUBUNIT_BIOGENESIS	34	-0.396161	-1.10954	0.36673	1	1	2267	tags=32%, list=21%, signal=41%
GO_LIPOPROTEIN_BIOSYNTHETIC_PROCESS	51	-0.281119	-1.10622	0.304673	1	1	2790	tags=35%, list=26%, signal=47%
GO_CONNECTIVE_TISSUE_DEVELOPMENT	121	-0.279867	-1.10618	0.308017	1	1	2227	tags=28%, list=21%, signal=35%
GO_CELL_COMMUNICATION_INVOLVED_IN_CARDIAC_CONDUCTION	20	-0.35789	-1.10544	0.321503	1	1	877	tags=25%, list=8%, signal=27%
GO_HYDROGEN_TRANSPORT	72	-0.318306	-1.1044	0.347059	1	1	1775	tags=29%, list=16%, signal=35%
GO_FRIZZLED_BINDING	25	-0.358168	-1.10439	0.325482	1	1	1359	tags=28%, list=13%, signal=32%
GO_GLYCEROLIPID_BIOSYNTHETIC_PROCESS	122	-0.247775	-1.10427	0.269939	1	1	2167	tags=26%, list=20%, signal=32%
GO_REGULATION_OF_CELLULAR_PH	41	-0.308748	-1.1041	0.313253	1	1	3006	tags=37%, list=28%, signal=50%
GO_REGULATION_OF_PROTEIN_STABILITY	129	-0.236212	-1.1035	0.25098	1	1	1654	tags=19%, list=15%, signal=23%
GO_TRANSLATION_INITIATION_FACTOR_ACTIVITY	29	-0.364975	-1.10292	0.356855	1	1	2872	tags=45%, list=27%, signal=61%
GO_DEVELOPMENTAL_CELL_GROWTH	47	-0.300311	-1.10045	0.311609	1	1	1881	tags=26%, list=17%, signal=31%
GO_POSITIVE_REGULATION_OF_TRANSPORTER_ACTIVITY	41	-0.292738	-1.09914	0.320166	1	1	1339	tags=22%, list=12%, signal=25%
GO_MITOCHONDRIAL_TRANSLATION	60	-0.368255	-1.09904	0.388145	1	1	3298	tags=52%, list=30%, signal=74%
GO_POSITIVE_REGULATION_OF_STEM_CELL_DIFFERENTIATION	33	-0.320107	-1.09813	0.327198	1	1	1566	tags=30%, list=14%, signal=35%
GO_HYDROGEN_EXPORTING_ATPASE_ACTIVITY	17	-0.426237	-1.0975	0.361165	1	1	3345	tags=47%, list=31%, signal=68%
GO_RIBONUCLEOPROTEIN_COMPLEX_BIOGENESIS	241	-0.317233	-1.09368	0.369732	1	1	3499	tags=48%, list=32%, signal=70%
GO_PHOSPHATIDYLINOSITOL_KINASE_ACTIVITY	26	-0.34243	-1.09325	0.334034	1	1	2167	tags=31%, list=20%, signal=38%
GO_ANTERIOR_POSTERIOR_PATTERN_SPECIFICATION	125	-0.274926	-1.09179	0.310345	1	1	1320	tags=22%, list=12%, signal=25%
GO_KERATAN_SULFATE_BIOSYNTHETIC_PROCESS	17	-0.373756	-1.09087	0.361377	1	1	2338	tags=35%, list=22%, signal=45%
GO_REGULATION_OF_SKELETAL_MUSCLE_TISSUE_DEVELOPMENT	31	-0.343124	-1.09017	0.321429	1	1	1507	tags=29%, list=14%, signal=34%
GO_CELL_MORPHOGENESIS_INVOLVED_IN_NEURON_DIFFERENTIATION	206	-0.254426	-1.09014	0.303534	1	1	2040	tags=27%, list=19%, signal=32%
GO_RESPONSE_TO_TRANSFORMING_GROWTH_FACTOR_BETA	91	-0.270195	-1.08846	0.307018	1	1	2840	tags=38%, list=26%, signal=52%
GO_RESPONSE_TO_STARVATION	92	-0.254286	-1.08807	0.286853	1	1	2337	tags=33%, list=22%, signal=41%
GO_SMAD_BINDING	39	-0.318702	-1.08597	0.329389	1	1	1297	tags=23%, list=12%, signal=26%
GO_TRICARBOXYLIC_ACID_METABOLIC_PROCESS	23	-0.372489	-1.08407	0.361165	1	1	867	tags=22%, list=8%, signal=24%
GO_ADULT_BEHAVIOR	80	-0.271748	-1.08372	0.332	1	1	1577	tags=26%, list=15%, signal=30%
GO_CELLULAR_RESPONSE_TO_AMINO_ACID_STIMULUS	28	-0.338342	-1.0837	0.354772	1	1	2313	tags=36%, list=21%, signal=45%
GO_NEGATIVE_REGULATION_OF_SYNAPTIC_TRANSMISSION	40	-0.298761	-1.08148	0.319588	1	1	1781	tags=28%, list=16%, signal=33%
GO_MITOCHONDRIAL_ENVELOPE	386	-0.284695	-1.08128	0.373047	1	1	3112	tags=40%, list=29%, signal=55%
GO_ERYTHROCYTE_DEVELOPMENT	15	-0.359975	-1.07734	0.360624	1	1	1993	tags=33%, list=18%, signal=41%
GO_HINDBRAIN_DEVELOPMENT	74	-0.267542	-1.07623	0.341414	1	1	1428	tags=22%, list=13%, signal=25%
GO_POSITIVE_REGULATION_OF_PROTEASOMAL_PROTEIN_CATABOLIC_PROCESS	56	-0.25349	-1.07402	0.344554	1	1	2166	tags=25%, list=20%, signal=31%
GO_REGULATION_OF_DIGESTIVE_SYSTEM_PROCESS	16	-0.366691	-1.07264	0.371197	1	1	1053	tags=25%, list=10%, signal=28%
GO_CELL_PART_MORPHOGENESIS	360	-0.230628	-1.07211	0.335354	1	1	2391	tags=29%, list=22%, signal=35%
GO_HYDROGEN_ION_TRANSMEMBRANE_TRANSPORT	57	-0.32782	-1.07124	0.378641	1	1	1711	tags=30%, list=16%, signal=35%
GO_SINGLE_STRANDED_RNA_BINDING	38	-0.314685	-1.07089	0.38114	1	1	1941	tags=26%, list=18%, signal=32%
GO_REGULATION_OF_GLUCOSE_TRANSPORT	59	-0.263783	-1.06882	0.338583	1	1	1579	tags=20%, list=15%, signal=24%
GO_DENDRITE	251	-0.227093	-1.06835	0.349206	1	1	3734	tags=44%, list=34%, signal=66%
GO_ENDONUCLEASE_ACTIVITY_ACTIVE_WITH_EITHER_RIBO_OR_DEOXYRIBONUCLEIC_ACIDS_AND_PRODUCING_5_PHOSPHOMONOESTERS	20	-0.362747	-1.06634	0.407619	1	1	2248	tags=40%, list=21%, signal=50%
GO_POLYSACCHARIDE_CATABOLIC_PROCESS	17	-0.355597	-1.06538	0.374753	1	1	1188	tags=24%, list=11%, signal=26%
GO_REGULATION_OF_ESTABLISHMENT_OF_PROTEIN_LOCALIZATION_TO_MITOCHONDRION	72	-0.254059	-1.06363	0.344488	1	1	1399	tags=19%, list=13%, signal=22%
GO_REGULATION_OF_STEM_CELL_PROLIFERATION	51	-0.283121	-1.06346	0.349138	1	1	1739	tags=25%, list=16%, signal=30%
GO_CYCLIC_NUCLEOTIDE_MEDIATED_SIGNALING	26	-0.322137	-1.06344	0.371373	1	1	1166	tags=23%, list=11%, signal=26%
GO_RNA_POLYMERASE_ACTIVITY	20	-0.381599	-1.06199	0.381423	1	1	1195	tags=25%, list=11%, signal=28%
GO_NONMOTILE_PRIMARY_CILIUM_ASSEMBLY	15	-0.388803	-1.06144	0.388781	1	1	3905	tags=67%, list=36%, signal=104%
GO_MATING	24	-0.337596	-1.06016	0.382353	1	1	1428	tags=29%, list=13%, signal=34%
GO_TRANSLATION_REGULATOR_ACTIVITY	18	-0.332452	-1.05927	0.358095	1	1	1900	tags=33%, list=18%, signal=40%
GO_REGULATION_OF_MUSCLE_TISSUE_DEVELOPMENT	66	-0.279508	-1.05917	0.340081	1	1	1743	tags=27%, list=16%, signal=32%
GO_METENCEPHALON_DEVELOPMENT	56	-0.274985	-1.05551	0.355731	1	1	1428	tags=23%, list=13%, signal=27%
GO_S_ADENOSYLMETHIONINE_DEPENDENT_METHYLTRANSFERASE_ACTIVITY	63	-0.265115	-1.05184	0.372781	1	1	1761	tags=24%, list=16%, signal=28%
GO_RESPONSE_TO_ISCHEMIA	23	-0.33037	-1.04999	0.401186	1	1	607	tags=17%, list=6%, signal=18%
GO_MITOCHONDRION_ORGANIZATION	344	-0.250951	-1.04949	0.382784	1	1	3186	tags=38%, list=29%, signal=52%
GO_HISTONE_METHYLTRANSFERASE_ACTIVITY	27	-0.322034	-1.04817	0.396761	1	1	1761	tags=30%, list=16%, signal=35%
GO_SMAD_PROTEIN_SIGNAL_TRANSDUCTION	35	-0.316536	-1.04746	0.402923	1	1	800	tags=20%, list=7%, signal=22%
GO_RIBOSOME_BIOGENESIS	177	-0.323346	-1.04638	0.405714	1	1	3499	tags=48%, list=32%, signal=70%
GO_PROTEIN_TRANSPORT_ALONG_MICROTUBULE	18	-0.379002	-1.04586	0.419355	1	1	1089	tags=22%, list=10%, signal=25%
GO_RESPONSE_TO_INCREASED_OXYGEN_LEVELS	15	-0.345312	-1.0443	0.386831	1	1	987	tags=27%, list=9%, signal=29%
GO_SULFUR_COMPOUND_BINDING	136	-0.260962	-1.04249	0.377282	1	1	1739	tags=26%, list=16%, signal=30%
GO_GPI_ANCHOR_METABOLIC_PROCESS	18	-0.361842	-1.04229	0.399621	1	1	3749	tags=50%, list=35%, signal=76%
GO_MRNA_METABOLIC_PROCESS	339	-0.261505	-1.04229	0.38716	1	1	3144	tags=41%, list=29%, signal=56%
GO_PLATELET_ALPHA_GRANULE_LUMEN	39	-0.357909	-1.04139	0.421162	1	1	3254	tags=54%, list=30%, signal=77%
GO_MACROMOLECULE_METHYLATION	100	-0.250727	-1.04078	0.355556	1	1	1761	tags=23%, list=16%, signal=27%
GO_DETOXIFICATION	42	-0.301097	-1.03943	0.399225	1	1	2138	tags=26%, list=20%, signal=33%
GO_APPENDAGE_DEVELOPMENT	99	-0.269672	-1.03786	0.393638	1	1	1936	tags=26%, list=18%, signal=32%
GO_REGULATION_OF_NEUROTRANSMITTER_TRANSPORT	33	-0.301069	-1.03776	0.388186	1	1	1781	tags=27%, list=16%, signal=33%
GO_RRNA_METABOLIC_PROCESS	148	-0.3194	-1.0377	0.413989	1	1	3496	tags=51%, list=32%, signal=74%
GO_AMMONIUM_TRANSMEMBRANE_TRANSPORTER_ACTIVITY	18	-0.363235	-1.03655	0.399568	1	1	1652	tags=33%, list=15%, signal=39%
GO_ADENYLYLTRANSFERASE_ACTIVITY	16	-0.351487	-1.03288	0.412451	1	1	2537	tags=31%, list=23%, signal=41%
GO_REGIONALIZATION	198	-0.251832	-1.03265	0.398406	1	1	1975	tags=26%, list=18%, signal=32%
GO_PATTERN_SPECIFICATION_PROCESS	256	-0.242042	-1.03251	0.387879	1	1	2394	tags=29%, list=22%, signal=37%
GO_LIPOSACCHARIDE_METABOLIC_PROCESS	66	-0.287808	-1.03216	0.409524	1	1	1791	tags=26%, list=17%, signal=31%
GO_4_IRON_4_SULFUR_CLUSTER_BINDING	26	-0.335272	-1.03129	0.426901	1	1	3133	tags=42%, list=29%, signal=59%
GO_NUCLEOSIDE_TRIPHOSPHATE_METABOLIC_PROCESS	136	-0.303462	-1.03065	0.419922	1	1	2897	tags=42%, list=27%, signal=57%
GO_RETINA_MORPHOGENESIS_IN_CAMERA_TYPE_EYE	25	-0.326943	-1.03058	0.407098	1	1	403	tags=16%, list=4%, signal=17%
GO_REGULATION_OF_HEART_GROWTH	28	-0.30965	-1.02978	0.422917	1	1	1816	tags=29%, list=17%, signal=34%
GO_S_ACYLTRANSFERASE_ACTIVITY	17	-0.346905	-1.02644	0.45509	1	1	2774	tags=47%, list=26%, signal=63%
GO_POSITIVE_REGULATION_OF_HEART_CONTRACTION	18	-0.345069	-1.02607	0.426036	1	1	3063	tags=44%, list=28%, signal=62%
GO_FORELIMB_MORPHOGENESIS	26	-0.325279	-1.02578	0.425963	1	1	1640	tags=31%, list=15%, signal=36%
GO_REGULATION_OF_PROTEIN_TARGETING_TO_MITOCHONDRION	59	-0.255786	-1.0254	0.393145	1	1	1399	tags=20%, list=13%, signal=23%
GO_CELL_CELL_ADHERENS_JUNCTION	30	-0.298146	-1.02509	0.433333	1	1	1885	tags=23%, list=17%, signal=28%
GO_FATTY_ACID_BETA_OXIDATION	30	-0.310854	-1.02445	0.402806	1	1	2069	tags=33%, list=19%, signal=41%
GO_REGULATION_OF_MICROTUBULE_POLYMERIZATION	20	-0.327041	-1.02427	0.422925	1	1	3426	tags=40%, list=32%, signal=58%
GO_SULFUR_COMPOUND_CATABOLIC_PROCESS	25	-0.326413	-1.02424	0.411647	1	1	3942	tags=52%, list=36%, signal=82%
GO_CYTOPLASMIC_STRESS_GRANULE	16	-0.376795	-1.02366	0.436214	1	1	1391	tags=31%, list=13%, signal=36%
GO_NEGATIVE_REGULATION_OF_BMP_SIGNALING_PATHWAY	25	-0.313212	-1.02348	0.41841	1	1	2496	tags=40%, list=23%, signal=52%
GO_POSITIVE_REGULATION_OF_CANONICAL_WNT_SIGNALING_PATHWAY	72	-0.256164	-1.02313	0.411157	1	1	1371	tags=19%, list=13%, signal=22%
GO_RESPONSE_TO_INSULIN	131	-0.231552	-1.0217	0.404908	1	1	2337	tags=24%, list=22%, signal=31%
GO_POSITIVE_REGULATION_OF_MRNA_PROCESSING	20	-0.35107	-1.02084	0.44668	1	1	3137	tags=45%, list=29%, signal=63%
GO_REGULATION_OF_PHOSPHOPROTEIN_PHOSPHATASE_ACTIVITY	40	-0.273499	-1.02002	0.442387	1	1	2679	tags=33%, list=25%, signal=43%
GO_NEURON_APOPTOTIC_PROCESS	24	-0.295539	-1.01759	0.423695	1	1	1701	tags=29%, list=16%, signal=35%
GO_NON_CANONICAL_WNT_SIGNALING_PATHWAY	82	-0.243453	-1.0173	0.40568	1	1	2613	tags=28%, list=24%, signal=37%
GO_PIGMENTATION	41	-0.306073	-1.01669	0.421154	1	1	3585	tags=44%, list=33%, signal=65%
GO_ACTIN_FILAMENT_BUNDLE_ORGANIZATION	28	-0.295381	-1.01504	0.446184	1	1	1053	tags=18%, list=10%, signal=20%
GO_PLASMA_MEMBRANE_RAFT	51	-0.273335	-1.01494	0.425056	1	1	1339	tags=22%, list=12%, signal=24%
GO_NCRNA_PROCESSING	217	-0.296787	-1.01493	0.433269	1	1	3261	tags=43%, list=30%, signal=61%
GO_NUCLEOTIDE_EXCISION_REPAIR	55	-0.273103	-1.01385	0.449807	1	1	3568	tags=42%, list=33%, signal=62%
GO_PYRIMIDINE_NUCLEOTIDE_BIOSYNTHETIC_PROCESS	16	-0.354584	-1.01343	0.460076	1	1	2013	tags=38%, list=19%, signal=46%
GO_NEURON_PROJECTION_MORPHOGENESIS	229	-0.230975	-1.01318	0.413306	1	1	2040	tags=25%, list=19%, signal=31%
GO_MITOCHONDRIAL_MATRIX	233	-0.270262	-1.01298	0.435514	1	1	2897	tags=36%, list=27%, signal=48%
GO_SAGA_TYPE_COMPLEX	22	-0.329078	-1.01174	0.473373	1	1	436	tags=14%, list=4%, signal=14%
GO_POSITIVE_REGULATION_OF_INSULIN_SECRETION_INVOLVED_IN_CELLULAR_RESPONSE_TO_GLUCOSE_STIMULUS	17	-0.340082	-1.01096	0.450216	1	1	1879	tags=29%, list=17%, signal=36%
GO_REGULATION_OF_SODIUM_ION_TRANSMEMBRANE_TRANSPORT	24	-0.312319	-1.00989	0.418219	1	1	1282	tags=21%, list=12%, signal=24%
GO_CEREBRAL_CORTEX_CELL_MIGRATION	22	-0.340774	-1.00878	0.425573	1	1	3416	tags=55%, list=32%, signal=80%
GO_LUNG_CELL_DIFFERENTIATION	17	-0.347645	-1.00789	0.432323	1	1	1065	tags=24%, list=10%, signal=26%
GO_KERATAN_SULFATE_METABOLIC_PROCESS	19	-0.344179	-1.00611	0.465619	1	1	2338	tags=32%, list=22%, signal=40%
GO_REGULATION_OF_EMBRYONIC_DEVELOPMENT	65	-0.261542	-1.00497	0.441955	1	1	2496	tags=34%, list=23%, signal=44%
GO_CATION_CHANNEL_COMPLEX	92	-0.260669	-1.00442	0.435583	1	1	2125	tags=32%, list=20%, signal=39%
GO_DIGESTIVE_SYSTEM_DEVELOPMENT	90	-0.267399	-1.00408	0.439024	1	1	2296	tags=33%, list=21%, signal=42%
GO_LYTIC_VACUOLE_ORGANIZATION	35	-0.285326	-1.00393	0.471058	1	1	2686	tags=34%, list=25%, signal=45%
GO_CANONICAL_WNT_SIGNALING_PATHWAY	60	-0.264429	-1.00165	0.408247	1	1	1743	tags=27%, list=16%, signal=32%
GO_SKELETAL_SYSTEM_DEVELOPMENT	262	-0.236442	-1.0007	0.446089	1	1	2338	tags=29%, list=22%, signal=36%
GO_REGULATION_OF_NEURAL_PRECURSOR_CELL_PROLIFERATION	50	-0.266186	-1.0005	0.448852	1	1	1599	tags=26%, list=15%, signal=30%
GO_RESPONSE_TO_COLD	29	-0.28766	-0.999965	0.472	1	1	1968	tags=28%, list=18%, signal=34%
GO_CELL_PROJECTION_CYTOPLASM	31	-0.291399	-0.998571	0.434698	1	1	3018	tags=35%, list=28%, signal=49%
GO_IONOTROPIC_GLUTAMATE_RECEPTOR_SIGNALING_PATHWAY	17	-0.342973	-0.998298	0.488421	1	1	1238	tags=29%, list=11%, signal=33%
GO_DIGESTIVE_TRACT_MORPHOGENESIS	27	-0.344301	-0.995889	0.451143	1	1	717	tags=26%, list=7%, signal=28%
GO_REGULATION_OF_ORGANIC_ACID_TRANSPORT	31	-0.290876	-0.995495	0.461386	1	1	1578	tags=29%, list=15%, signal=34%
GO_BEHAVIOR	296	-0.214613	-0.994822	0.456389	1	1	1603	tags=20%, list=15%, signal=23%
GO_HINDLIMB_MORPHOGENESIS	20	-0.339274	-0.993795	0.475634	1	1	1743	tags=25%, list=16%, signal=30%
GO_EXCITATORY_EXTRACELLULAR_LIGAND_GATED_ION_CHANNEL_ACTIVITY	35	-0.293964	-0.993698	0.465409	1	1	255	tags=14%, list=2%, signal=15%
GO_EXTRACELLULAR_GLUTAMATE_GATED_ION_CHANNEL_ACTIVITY	15	-0.360617	-0.992569	0.444211	1	1	255	tags=20%, list=2%, signal=20%
GO_POSITIVE_REGULATION_OF_SODIUM_ION_TRANSPORT	20	-0.321655	-0.992542	0.470942	1	1	901	tags=25%, list=8%, signal=27%
GO_POSITIVE_REGULATION_OF_MITOCHONDRION_ORGANIZATION	93	-0.238297	-0.992057	0.465028	1	1	1654	tags=20%, list=15%, signal=24%
GO_KINASE_INHIBITOR_ACTIVITY	53	-0.242659	-0.989477	0.471058	1	1	2796	tags=36%, list=26%, signal=48%
GO_HEME_METABOLIC_PROCESS	16	-0.384116	-0.988502	0.484112	1	1	3560	tags=56%, list=33%, signal=84%
GO_EMBRYONIC_ORGAN_MORPHOGENESIS	163	-0.240205	-0.987281	0.448347	1	1	1743	tags=22%, list=16%, signal=26%
GO_GOLGI_TO_PLASMA_MEMBRANE_PROTEIN_TRANSPORT	18	-0.309827	-0.987011	0.468254	1	1	2171	tags=28%, list=20%, signal=35%
GO_POSITIVE_REGULATION_OF_SMOOTH_MUSCLE_CONTRACTION	18	-0.340465	-0.986945	0.451143	1	1	1428	tags=28%, list=13%, signal=32%
GO_TRANSCRIPTION_FACTOR_ACTIVITY_DIRECT_LIGAND_REGULATED_SEQUENCE_SPECIFIC_DNA_BINDING	28	-0.286789	-0.986606	0.470339	1	1	1076	tags=18%, list=10%, signal=20%
GO_POSITIVE_REGULATION_OF_NEURAL_PRECURSOR_CELL_PROLIFERATION	28	-0.294496	-0.985402	0.453564	1	1	1320	tags=25%, list=12%, signal=28%
GO_NEGATIVE_REGULATION_OF_RESPONSE_TO_BIOTIC_STIMULUS	16	-0.324913	-0.983739	0.473161	1	1	2029	tags=31%, list=19%, signal=38%
GO_RNA_PROCESSING	456	-0.250135	-0.981948	0.477099	1	1	3035	tags=37%, list=28%, signal=49%
GO_VITAMIN_BINDING	43	-0.2696	-0.98144	0.478516	1	1	1483	tags=21%, list=14%, signal=24%
GO_CYCLIC_NUCLEOTIDE_METABOLIC_PROCESS	29	-0.289841	-0.979906	0.476768	1	1	1128	tags=24%, list=10%, signal=27%
GO_FERTILIZATION	84	-0.237262	-0.979246	0.486538	1	1	1040	tags=19%, list=10%, signal=21%
GO_CELLULAR_RESPONSE_TO_EXTRACELLULAR_STIMULUS	108	-0.225265	-0.977894	0.489496	1	1	3159	tags=41%, list=29%, signal=57%
GO_SODIUM_CHANNEL_REGULATOR_ACTIVITY	18	-0.32464	-0.977894	0.481876	1	1	1282	tags=28%, list=12%, signal=31%
GO_CELLULAR_MONOVALENT_INORGANIC_CATION_HOMEOSTASIS	48	-0.261699	-0.977815	0.481633	1	1	3006	tags=35%, list=28%, signal=49%
GO_STEROID_BINDING	43	-0.281857	-0.977677	0.488934	1	1	1738	tags=30%, list=16%, signal=36%
GO_NEGATIVE_REGULATION_OF_PROTEIN_POLYMERIZATION	32	-0.278166	-0.977071	0.468938	1	1	910	tags=16%, list=8%, signal=17%
GO_REGULATION_OF_TOR_SIGNALING	34	-0.280632	-0.976323	0.469548	1	1	1698	tags=21%, list=16%, signal=24%
GO_PROTEIN_IMPORT	92	-0.223459	-0.975499	0.499051	1	1	2689	tags=30%, list=25%, signal=40%
GO_MONOVALENT_INORGANIC_CATION_TRANSPORT	234	-0.21122	-0.975467	0.5	1	1	1775	tags=22%, list=16%, signal=26%
GO_AXONEME_ASSEMBLY	25	-0.337384	-0.973109	0.501018	1	1	2296	tags=44%, list=21%, signal=56%
GO_REGULATION_OF_CILIUM_ASSEMBLY	32	-0.285368	-0.972515	0.481836	1	1	1442	tags=19%, list=13%, signal=22%
GO_RETINA_DEVELOPMENT_IN_CAMERA_TYPE_EYE	65	-0.247383	-0.971772	0.495049	1	1	664	tags=12%, list=6%, signal=13%
GO_FACE_DEVELOPMENT	25	-0.304471	-0.971733	0.493976	1	1	987	tags=16%, list=9%, signal=18%
GO_CILIARY_PART	166	-0.225795	-0.971673	0.484127	1	1	2391	tags=28%, list=22%, signal=36%
GO_RIBONUCLEOSIDE_TRIPHOSPHATE_BIOSYNTHETIC_PROCESS	23	-0.370694	-0.971303	0.47767	1	1	3290	tags=52%, list=30%, signal=75%
GO_CATION_TRANSPORTING_ATPASE_ACTIVITY	36	-0.286368	-0.970807	0.497065	1	1	3435	tags=42%, list=32%, signal=61%
GO_ION_CHANNEL_BINDING	58	-0.243404	-0.970572	0.481696	1	1	1879	tags=21%, list=17%, signal=25%
GO_NEGATIVE_REGULATION_OF_INTRACELLULAR_STEROID_HORMONE_RECEPTOR_SIGNALING_PATHWAY	18	-0.318908	-0.970553	0.506931	1	1	2580	tags=44%, list=24%, signal=58%
GO_NEGATIVE_REGULATION_OF_TRANSMEMBRANE_TRANSPORT	44	-0.267477	-0.970461	0.473451	1	1	1781	tags=25%, list=16%, signal=30%
GO_POSITIVE_REGULATION_OF_PROTEIN_LOCALIZATION_TO_CELL_PERIPHERY	21	-0.281889	-0.969277	0.492481	1	1	2512	tags=38%, list=23%, signal=50%
GO_STEROID_HORMONE_RECEPTOR_ACTIVITY	35	-0.267284	-0.968834	0.483193	1	1	1076	tags=17%, list=10%, signal=19%
GO_TETRAPYRROLE_BIOSYNTHETIC_PROCESS	16	-0.37009	-0.96847	0.461101	1	1	3560	tags=56%, list=33%, signal=84%
GO_NEGATIVE_REGULATION_OF_AUTOPHAGY	29	-0.282281	-0.967714	0.489237	1	1	2686	tags=41%, list=25%, signal=55%
GO_NEURAL_TUBE_DEVELOPMENT	96	-0.24514	-0.967135	0.490798	1	1	3284	tags=42%, list=30%, signal=59%
GO_SOMATODENDRITIC_COMPARTMENT	365	-0.197205	-0.96597	0.495069	1	1	3018	tags=32%, list=28%, signal=43%
GO_AMIDE_BIOSYNTHETIC_PROCESS	285	-0.256383	-0.965681	0.496154	1	1	3215	tags=43%, list=30%, signal=60%
GO_REPRESSING_TRANSCRIPTION_FACTOR_BINDING	36	-0.268371	-0.964585	0.503171	1	1	1017	tags=19%, list=9%, signal=21%
GO_INORGANIC_CATION_TRANSMEMBRANE_TRANSPORTER_ACTIVITY	285	-0.201066	-0.964125	0.519192	1	1	1745	tags=21%, list=16%, signal=24%
GO_REGULATION_OF_CATION_CHANNEL_ACTIVITY	46	-0.25703	-0.963421	0.482833	1	1	3056	tags=41%, list=28%, signal=57%
GO_RIBONUCLEOPROTEIN_COMPLEX	407	-0.241219	-0.963129	0.469112	1	1	3127	tags=38%, list=29%, signal=51%
GO_MITOCHONDRIAL_MEMBRANE_ORGANIZATION	53	-0.272782	-0.963042	0.506823	1	1	2119	tags=30%, list=20%, signal=37%
GO_SINGLE_FERTILIZATION	63	-0.241141	-0.962969	0.504744	1	1	1040	tags=19%, list=10%, signal=21%
GO_PROTEIN_KINASE_COMPLEX	56	-0.240172	-0.962952	0.517454	1	1	3026	tags=39%, list=28%, signal=54%
GO_CELL_SUBSTRATE_ADHERENS_JUNCTION_ASSEMBLY	17	-0.316372	-0.962808	0.493177	1	1	98	tags=12%, list=1%, signal=12%
GO_REGULATION_OF_CELLULAR_RESPONSE_TO_TRANSFORMING_GROWTH_FACTOR_BETA_STIMULUS	67	-0.245154	-0.962682	0.505929	1	1	769	tags=16%, list=7%, signal=18%
GO_NEGATIVE_REGULATION_OF_EMBRYONIC_DEVELOPMENT	20	-0.323903	-0.961048	0.503093	1	1	3370	tags=45%, list=31%, signal=65%
GO_CALCIUM_ION_REGULATED_EXOCYTOSIS_OF_NEUROTRANSMITTER	16	-0.327672	-0.960947	0.504892	1	1	448	tags=19%, list=4%, signal=20%
GO_MEMBRANE_ORGANIZATION	490	-0.189765	-0.95983	0.517103	1	1	2934	tags=33%, list=27%, signal=43%
GO_HORMONE_BINDING	34	-0.275723	-0.959443	0.516	1	1	1471	tags=24%, list=14%, signal=27%
GO_NEGATIVE_REGULATION_OF_KINASE_ACTIVITY	159	-0.202837	-0.956865	0.533755	1	1	3019	tags=34%, list=28%, signal=46%
GO_RIBOSOMAL_SMALL_SUBUNIT_BIOGENESIS	28	-0.354686	-0.956507	0.516791	1	1	3425	tags=57%, list=32%, signal=83%
GO_GLYCOLIPID_BIOSYNTHETIC_PROCESS	32	-0.281184	-0.955735	0.525391	1	1	1520	tags=22%, list=14%, signal=25%
GO_INTRINSIC_APOPTOTIC_SIGNALING_PATHWAY_BY_P53_CLASS_MEDIATOR	30	-0.282557	-0.955383	0.493204	1	1	2620	tags=33%, list=24%, signal=44%
GO_MRNA_3_END_PROCESSING	49	-0.283468	-0.953119	0.507905	1	1	2230	tags=31%, list=21%, signal=38%
GO_SENSORY_ORGAN_MORPHOGENESIS	145	-0.230754	-0.952718	0.501006	1	1	1743	tags=21%, list=16%, signal=25%
GO_SPERM_FLAGELLUM	29	-0.285177	-0.952466	0.498994	1	1	3508	tags=52%, list=32%, signal=76%
GO_BIOMINERAL_TISSUE_DEVELOPMENT	37	-0.286028	-0.951011	0.525751	1	1	1739	tags=30%, list=16%, signal=35%
GO_WNT_SIGNALING_PATHWAY	203	-0.203543	-0.950422	0.535124	1	1	1743	tags=20%, list=16%, signal=24%
GO_PROTEIN_TYROSINE_KINASE_BINDING	26	-0.275542	-0.949997	0.533195	1	1	1573	tags=19%, list=15%, signal=22%
GO_POSITIVE_REGULATION_OF_BINDING	77	-0.227119	-0.948575	0.542339	1	1	1570	tags=21%, list=14%, signal=24%
GO_NEURAL_TUBE_FORMATION	60	-0.253652	-0.9482	0.529652	1	1	2105	tags=27%, list=19%, signal=33%
GO_STEROL_BINDING	24	-0.293115	-0.948144	0.518672	1	1	2354	tags=38%, list=22%, signal=48%
GO_AEROBIC_RESPIRATION	33	-0.320271	-0.947507	0.530651	1	1	3660	tags=55%, list=34%, signal=82%
GO_TRANSCRIPTION_INITIATION_FROM_RNA_POLYMERASE_II_PROMOTER	86	-0.228967	-0.947383	0.531872	1	1	2046	tags=19%, list=19%, signal=23%
GO_CELLULAR_RESPONSE_TO_STARVATION	68	-0.231992	-0.946535	0.541082	1	1	3159	tags=41%, list=29%, signal=58%
GO_NEURON_PROJECTION_DEVELOPMENT	301	-0.206462	-0.945307	0.538775	1	1	2040	tags=24%, list=19%, signal=29%
GO_CELLULAR_MACROMOLECULAR_COMPLEX_ASSEMBLY	389	-0.202769	-0.945214	0.535448	1	1	3117	tags=35%, list=29%, signal=48%
GO_POSITIVE_REGULATION_OF_SMOOTHENED_SIGNALING_PATHWAY	17	-0.330641	-0.94486	0.537255	1	1	2035	tags=41%, list=19%, signal=51%
GO_RESPONSE_TO_FIBROBLAST_GROWTH_FACTOR	65	-0.231796	-0.94367	0.553061	1	1	1779	tags=23%, list=16%, signal=27%
GO_COPPER_ION_BINDING	30	-0.27061	-0.943624	0.55	1	1	2468	tags=37%, list=23%, signal=47%
GO_PRESYNAPSE	147	-0.222393	-0.942994	0.544715	1	1	1852	tags=22%, list=17%, signal=27%
GO_NEURON_PROJECTION_EXTENSION	32	-0.284319	-0.94253	0.548857	1	1	1631	tags=22%, list=15%, signal=26%
GO_ALCOHOL_BIOSYNTHETIC_PROCESS	65	-0.258207	-0.942453	0.540041	1	1	1883	tags=28%, list=17%, signal=33%
GO_NEGATIVE_REGULATION_OF_TRANSCRIPTION_FACTOR_IMPORT_INTO_NUCLEUS	18	-0.292472	-0.942404	0.524292	1	1	749	tags=17%, list=7%, signal=18%
GO_BETA_AMYLOID_BINDING	21	-0.295322	-0.942213	0.533333	1	1	2201	tags=33%, list=20%, signal=42%
GO_CELLULAR_AMIDE_METABOLIC_PROCESS	406	-0.228688	-0.942006	0.498084	1	1	3298	tags=41%, list=30%, signal=56%
GO_TRABECULA_MORPHOGENESIS	19	-0.311791	-0.94146	0.516765	1	1	3134	tags=47%, list=29%, signal=67%
GO_PERIKARYON	46	-0.261165	-0.941456	0.540373	1	1	2149	tags=26%, list=20%, signal=32%
GO_PLATELET_ALPHA_GRANULE	49	-0.295119	-0.940632	0.527495	1	1	2952	tags=45%, list=27%, signal=61%
GO_REGULATION_OF_PH	49	-0.252156	-0.940026	0.531621	1	1	3044	tags=39%, list=28%, signal=54%
GO_NUCLEOSIDE_PHOSPHATE_BIOSYNTHETIC_PROCESS	95	-0.227676	-0.939544	0.507692	1	1	2013	tags=24%, list=19%, signal=29%
GO_CALMODULIN_DEPENDENT_PROTEIN_KINASE_ACTIVITY	18	-0.308722	-0.939543	0.526923	1	1	578	tags=17%, list=5%, signal=18%
GO_NUCLEOSIDE_MONOPHOSPHATE_BIOSYNTHETIC_PROCESS	46	-0.283617	-0.939024	0.515936	1	1	2013	tags=26%, list=19%, signal=32%
GO_CYCLIN_DEPENDENT_PROTEIN_KINASE_HOLOENZYME_COMPLEX	18	-0.29966	-0.938412	0.529175	1	1	2781	tags=50%, list=26%, signal=67%
GO_TRANSLATION_FACTOR_ACTIVITY_RNA_BINDING	45	-0.280803	-0.938041	0.512524	1	1	2872	tags=38%, list=27%, signal=51%
GO_ATPASE_ACTIVITY_COUPLED_TO_MOVEMENT_OF_SUBSTANCES	69	-0.241255	-0.937964	0.51497	1	1	2883	tags=33%, list=27%, signal=45%
GO_PEPTIDE_SECRETION	31	-0.270404	-0.936148	0.564103	1	1	662	tags=16%, list=6%, signal=17%
GO_INTRINSIC_COMPONENT_OF_MITOCHONDRIAL_OUTER_MEMBRANE	17	-0.317691	-0.93586	0.542969	1	1	158	tags=12%, list=1%, signal=12%
GO_GLYCEROPHOSPHOLIPID_METABOLIC_PROCESS	171	-0.199127	-0.934952	0.565844	1	1	2194	tags=26%, list=20%, signal=32%
GO_NEGATIVE_REGULATION_OF_SMALL_GTPASE_MEDIATED_SIGNAL_TRANSDUCTION	23	-0.296443	-0.933808	0.545455	1	1	2837	tags=39%, list=26%, signal=53%
GO_POSITIVE_REGULATION_OF_RELEASE_OF_CYTOCHROME_C_FROM_MITOCHONDRIA	18	-0.324808	-0.933345	0.532544	1	1	1646	tags=28%, list=15%, signal=33%
GO_NUCLEOTIDYLTRANSFERASE_ACTIVITY	73	-0.2365	-0.933163	0.546875	1	1	2375	tags=26%, list=22%, signal=33%
GO_NEGATIVE_REGULATION_OF_CELL_MATRIX_ADHESION	21	-0.298602	-0.932976	0.547414	1	1	495	tags=14%, list=5%, signal=15%
GO_TRNA_PROCESSING	60	-0.286684	-0.932434	0.526718	1	1	3168	tags=38%, list=29%, signal=54%
GO_PHOSPHOLIPID_TRANSPORT	26	-0.275364	-0.931398	0.529412	1	1	1823	tags=31%, list=17%, signal=37%
GO_MAIN_AXON	33	-0.27193	-0.930965	0.539841	1	1	2662	tags=39%, list=25%, signal=52%
GO_PHOSPHATIDYLINOSITOL_3_PHOSPHATE_BIOSYNTHETIC_PROCESS	24	-0.304789	-0.93002	0.535332	1	1	1743	tags=21%, list=16%, signal=25%
GO_SCF_UBIQUITIN_LIGASE_COMPLEX	19	-0.287664	-0.930002	0.571984	1	1	696	tags=21%, list=6%, signal=22%
GO_EXOCYTIC_VESICLE_MEMBRANE	27	-0.287372	-0.928125	0.532803	1	1	485	tags=15%, list=4%, signal=15%
GO_ESTABLISHMENT_OF_PROTEIN_LOCALIZATION_TO_VACUOLE	16	-0.337483	-0.927686	0.550898	1	1	3460	tags=56%, list=32%, signal=83%
GO_REGULATION_OF_ACTIVIN_RECEPTOR_SIGNALING_PATHWAY	19	-0.311577	-0.927677	0.555781	1	1	1081	tags=26%, list=10%, signal=29%
GO_CATION_TRANSMEMBRANE_TRANSPORTER_ACTIVITY	338	-0.189662	-0.926298	0.618	1	1	1775	tags=21%, list=16%, signal=24%
GO_NEURON_NEURON_SYNAPTIC_TRANSMISSION	31	-0.269339	-0.925698	0.557692	1	1	1270	tags=16%, list=12%, signal=18%
GO_GLYCOSPHINGOLIPID_METABOLIC_PROCESS	41	-0.287391	-0.925409	0.533074	1	1	1791	tags=27%, list=17%, signal=32%
GO_TRANSMEMBRANE_RECEPTOR_PROTEIN_TYROSINE_KINASE_ACTIVITY	36	-0.279782	-0.92538	0.536998	1	1	2584	tags=33%, list=24%, signal=44%
GO_ENDODEOXYRIBONUCLEASE_ACTIVITY	31	-0.282031	-0.92467	0.561224	1	1	1975	tags=26%, list=18%, signal=31%
GO_REGULATION_OF_GLUCOSE_METABOLIC_PROCESS	65	-0.227932	-0.924245	0.58502	1	1	680	tags=12%, list=6%, signal=13%
GO_ATPASE_COUPLED_ION_TRANSMEMBRANE_TRANSPORTER_ACTIVITY	42	-0.262359	-0.923834	0.553106	1	1	3044	tags=38%, list=28%, signal=53%
GO_NEGATIVE_REGULATION_OF_FAT_CELL_DIFFERENTIATION	26	-0.279548	-0.923406	0.524366	1	1	246	tags=12%, list=2%, signal=12%
GO_ESTABLISHMENT_OF_LOCALIZATION_BY_MOVEMENT_ALONG_MICROTUBULE	61	-0.240038	-0.923064	0.556008	1	1	1374	tags=18%, list=13%, signal=21%
GO_CENTRAL_NERVOUS_SYSTEM_NEURON_DEVELOPMENT	41	-0.26895	-0.922784	0.566532	1	1	1971	tags=29%, list=18%, signal=36%
GO_PHOSPHATIDYLINOSITOL_METABOLIC_PROCESS	105	-0.209095	-0.922115	0.585062	1	1	2194	tags=26%, list=20%, signal=32%
GO_SPINAL_CORD_PATTERNING	16	-0.342348	-0.921692	0.566337	1	1	1320	tags=38%, list=12%, signal=43%
GO_GLYCOSYL_COMPOUND_BIOSYNTHETIC_PROCESS	55	-0.26501	-0.921641	0.545631	1	1	2013	tags=24%, list=19%, signal=29%
GO_ELECTRON_CARRIER_ACTIVITY	68	-0.259784	-0.92164	0.533589	1	1	2897	tags=37%, list=27%, signal=50%
GO_GLYCOSYL_COMPOUND_METABOLIC_PROCESS	206	-0.225808	-0.920926	0.554493	1	1	2897	tags=35%, list=27%, signal=47%
GO_POSITIVE_REGULATION_OF_CARBOHYDRATE_METABOLIC_PROCESS	41	-0.255233	-0.920886	0.568376	1	1	1166	tags=17%, list=11%, signal=19%
GO_SYNAPTIC_MEMBRANE	146	-0.211582	-0.920871	0.586538	1	1	1305	tags=17%, list=12%, signal=19%
GO_REGULATION_OF_HEART_CONTRACTION	124	-0.221114	-0.91881	0.552361	1	1	1339	tags=20%, list=12%, signal=23%
GO_CILIUM_ORGANIZATION	102	-0.244555	-0.918281	0.55098	1	1	2391	tags=31%, list=22%, signal=40%
GO_ORGANIC_ACID_TRANSMEMBRANE_TRANSPORT	56	-0.238084	-0.918117	0.565041	1	1	2827	tags=38%, list=26%, signal=50%
GO_APOPTOTIC_MITOCHONDRIAL_CHANGES	39	-0.242498	-0.918041	0.583333	1	1	1789	tags=26%, list=17%, signal=31%
GO_AMMONIUM_TRANSPORT	34	-0.270322	-0.917469	0.6125	1	1	2715	tags=38%, list=25%, signal=51%
GO_CELL_CELL_JUNCTION_ASSEMBLY	33	-0.264332	-0.91707	0.5625	1	1	2681	tags=33%, list=25%, signal=44%
GO_REGULATION_OF_CALCIUM_ION_TRANSMEMBRANE_TRANSPORTER_ACTIVITY	43	-0.248456	-0.916327	0.603814	1	1	3056	tags=44%, list=28%, signal=61%
GO_PROTEIN_TYROSINE_SERINE_THREONINE_PHOSPHATASE_ACTIVITY	24	-0.267709	-0.916119	0.589494	1	1	1071	tags=21%, list=10%, signal=23%
GO_IRON_ION_HOMEOSTASIS	34	-0.262127	-0.915825	0.592814	1	1	1385	tags=21%, list=13%, signal=24%
GO_PURINE_NUCLEOSIDE_BIOSYNTHETIC_PROCESS	41	-0.291122	-0.914604	0.558594	1	1	2013	tags=24%, list=19%, signal=30%
GO_NEGATIVE_REGULATION_OF_ION_TRANSPORT	69	-0.232625	-0.913387	0.608407	1	1	1781	tags=26%, list=16%, signal=31%
GO_PROTEIN_KINASE_C_ACTIVATING_G_PROTEIN_COUPLED_RECEPTOR_SIGNALING_PATHWAY	21	-0.292432	-0.912782	0.559921	1	1	2929	tags=52%, list=27%, signal=72%
GO_PDZ_DOMAIN_BINDING	53	-0.250063	-0.912449	0.607287	1	1	2025	tags=23%, list=19%, signal=28%
GO_TUBE_FORMATION	76	-0.229177	-0.9123	0.608163	1	1	1936	tags=24%, list=18%, signal=29%
GO_REGULATION_OF_EPITHELIAL_TO_MESENCHYMAL_TRANSITION	44	-0.245373	-0.911244	0.593254	1	1	2496	tags=34%, list=23%, signal=44%
GO_EMBRYONIC_CRANIAL_SKELETON_MORPHOGENESIS	30	-0.281401	-0.91077	0.562624	1	1	1739	tags=30%, list=16%, signal=36%
GO_METANEPHRIC_NEPHRON_DEVELOPMENT	17	-0.31708	-0.910625	0.550725	1	1	3491	tags=59%, list=32%, signal=87%
GO_POSITIVE_REGULATION_OF_DENDRITIC_SPINE_DEVELOPMENT	17	-0.298561	-0.910316	0.603586	1	1	2084	tags=35%, list=19%, signal=44%
GO_ORGANIC_CYCLIC_COMPOUND_CATABOLIC_PROCESS	248	-0.213259	-0.910192	0.52	1	1	2531	tags=30%, list=23%, signal=39%
GO_AMINO_ACID_TRANSMEMBRANE_TRANSPORT	35	-0.260421	-0.910169	0.607143	1	1	3479	tags=51%, list=32%, signal=76%
GO_POSITIVE_REGULATION_OF_PROTEIN_COMPLEX_DISASSEMBLY	16	-0.319079	-0.910168	0.573146	1	1	759	tags=19%, list=7%, signal=20%
GO_TRANSLATIONAL_ELONGATION	61	-0.290582	-0.909754	0.56238	1	1	3804	tags=54%, list=35%, signal=83%
GO_MYELOID_CELL_DEVELOPMENT	28	-0.265293	-0.909352	0.572797	1	1	196	tags=11%, list=2%, signal=11%
GO_NUCLEOTIDE_SUGAR_METABOLIC_PROCESS	17	-0.307926	-0.908743	0.561616	1	1	2286	tags=35%, list=21%, signal=45%
GO_AMINO_SUGAR_METABOLIC_PROCESS	25	-0.271561	-0.908366	0.5666	1	1	2282	tags=32%, list=21%, signal=40%
GO_SENSORY_PERCEPTION	285	-0.190118	-0.907739	0.671937	1	1	1453	tags=18%, list=13%, signal=20%
GO_ASPARTATE_FAMILY_AMINO_ACID_BIOSYNTHETIC_PROCESS	17	-0.306543	-0.906423	0.554455	1	1	1264	tags=18%, list=12%, signal=20%
GO_NEURON_PROJECTION_TERMINUS	72	-0.231142	-0.906316	0.606719	1	1	1852	tags=21%, list=17%, signal=25%
GO_NOTCH_SIGNALING_PATHWAY	69	-0.222243	-0.906069	0.636364	1	1	2606	tags=29%, list=24%, signal=38%
GO_AMINO_ACID_TRANSMEMBRANE_TRANSPORTER_ACTIVITY	41	-0.25449	-0.905285	0.629555	1	1	2827	tags=41%, list=26%, signal=56%
GO_CILIUM_MORPHOGENESIS	113	-0.235592	-0.903891	0.589178	1	1	2391	tags=31%, list=22%, signal=39%
GO_OXIDOREDUCTASE_ACTIVITY	393	-0.204677	-0.903552	0.598848	1	1	1929	tags=23%, list=18%, signal=27%
GO_REGULATION_OF_STEROL_TRANSPORT	20	-0.306155	-0.90302	0.561475	1	1	1811	tags=35%, list=17%, signal=42%
GO_REGULATION_OF_TRANSPORTER_ACTIVITY	103	-0.209279	-0.902262	0.636364	1	1	1352	tags=18%, list=12%, signal=21%
GO_REGULATION_OF_BINDING	178	-0.192188	-0.901882	0.685437	1	1	1646	tags=19%, list=15%, signal=22%
GO_LATERAL_PLASMA_MEMBRANE	29	-0.278916	-0.900998	0.583333	1	1	408	tags=14%, list=4%, signal=14%
GO_POSITIVE_CHEMOTAXIS	22	-0.282634	-0.900913	0.631048	1	1	663	tags=18%, list=6%, signal=19%
GO_SYNAPTIC_SIGNALING	224	-0.199063	-0.900683	0.633663	1	1	1319	tags=17%, list=12%, signal=19%
GO_RESPONSE_TO_MONOAMINE	21	-0.289975	-0.900244	0.574468	1	1	1336	tags=24%, list=12%, signal=27%
GO_ATPASE_BINDING	43	-0.233826	-0.898024	0.605941	1	1	1037	tags=19%, list=10%, signal=20%
GO_THIOLESTER_HYDROLASE_ACTIVITY	18	-0.328764	-0.895839	0.565637	1	1	869	tags=22%, list=8%, signal=24%
GO_AMINOGLYCAN_CATABOLIC_PROCESS	39	-0.275677	-0.89578	0.61167	1	1	1111	tags=18%, list=10%, signal=20%
GO_POSITIVE_REGULATION_OF_SYNAPTIC_TRANSMISSION	52	-0.232713	-0.894121	0.635802	1	1	1960	tags=27%, list=18%, signal=33%
GO_A_BAND	23	-0.269848	-0.893739	0.585603	1	1	489	tags=17%, list=5%, signal=18%
GO_RESPONSE_TO_THYROID_HORMONE	15	-0.296108	-0.893574	0.606855	1	1	867	tags=20%, list=8%, signal=22%
GO_HEART_GROWTH	17	-0.300593	-0.893371	0.607676	1	1	2201	tags=35%, list=20%, signal=44%
GO_VOLTAGE_GATED_POTASSIUM_CHANNEL_ACTIVITY	47	-0.247862	-0.892977	0.629098	1	1	558	tags=15%, list=5%, signal=16%
GO_MRNA_SPLICE_SITE_SELECTION	16	-0.326564	-0.892641	0.578189	1	1	3396	tags=56%, list=31%, signal=82%
GO_HOMOPHILIC_CELL_ADHESION_VIA_PLASMA_MEMBRANE_ADHESION_MOLECULES	77	-0.255194	-0.891029	0.594538	1	1	1971	tags=30%, list=18%, signal=36%
GO_SOLUTE_SODIUM_SYMPORTER_ACTIVITY	25	-0.281762	-0.890611	0.607287	1	1	1380	tags=28%, list=13%, signal=32%
GO_ORGANOPHOSPHATE_METABOLIC_PROCESS	496	-0.185757	-0.888992	0.631783	1	1	2867	tags=30%, list=26%, signal=40%
GO_POLYSACCHARIDE_METABOLIC_PROCESS	57	-0.220584	-0.888572	0.653061	1	1	2972	tags=33%, list=27%, signal=46%
GO_POSITIVE_REGULATION_OF_SEQUENCE_SPECIFIC_DNA_BINDING_TRANSCRIPTION_FACTOR_ACTIVITY	134	-0.197296	-0.888414	0.637255	1	1	1438	tags=19%, list=13%, signal=21%
GO_HORMONE_TRANSPORT	40	-0.25105	-0.888088	0.638384	1	1	664	tags=15%, list=6%, signal=16%
GO_REGULATION_OF_DEPHOSPHORYLATION	90	-0.202066	-0.88757	0.656652	1	1	2521	tags=28%, list=23%, signal=36%
GO_EMBRYONIC_DIGESTIVE_TRACT_DEVELOPMENT	21	-0.315704	-0.887137	0.582988	1	1	2201	tags=38%, list=20%, signal=48%
GO_PURINE_CONTAINING_COMPOUND_METABOLIC_PROCESS	226	-0.210608	-0.886399	0.609524	1	1	2957	tags=34%, list=27%, signal=46%
GO_DNA_TEMPLATED_TRANSCRIPTION_INITIATION	115	-0.208725	-0.885166	0.628627	1	1	2046	tags=18%, list=19%, signal=22%
GO_NEGATIVE_REGULATION_OF_STAT_CASCADE	26	-0.253351	-0.884794	0.643426	1	1	1812	tags=27%, list=17%, signal=32%
GO_REGULATION_OF_MITOCHONDRION_ORGANIZATION	121	-0.211095	-0.884579	0.606178	1	1	1654	tags=18%, list=15%, signal=21%
GO_INNER_EAR_MORPHOGENESIS	53	-0.243544	-0.884455	0.637317	1	1	1227	tags=17%, list=11%, signal=19%
GO_VACUOLAR_LUMEN	64	-0.25448	-0.884107	0.581162	1	1	1207	tags=19%, list=11%, signal=21%
GO_NEURAL_CREST_CELL_DIFFERENTIATION	47	-0.251393	-0.883011	0.622881	1	1	1507	tags=23%, list=14%, signal=27%
GO_FOREBRAIN_NEURON_DEVELOPMENT	19	-0.304594	-0.882944	0.587771	1	1	3962	tags=68%, list=37%, signal=108%
GO_EMBRYONIC_FORELIMB_MORPHOGENESIS	25	-0.288519	-0.881892	0.613963	1	1	1640	tags=28%, list=15%, signal=33%
GO_ION_TRANSMEMBRANE_TRANSPORT	445	-0.175535	-0.881611	0.75	1	1	1763	tags=20%, list=16%, signal=23%
GO_NEGATIVE_REGULATION_OF_CELL_SUBSTRATE_ADHESION	35	-0.255342	-0.88136	0.634043	1	1	2354	tags=34%, list=22%, signal=44%
GO_EMBRYONIC_HINDLIMB_MORPHOGENESIS	17	-0.312375	-0.879698	0.633065	1	1	1743	tags=24%, list=16%, signal=28%
GO_BONE_MORPHOGENESIS	49	-0.251406	-0.879666	0.592213	1	1	2035	tags=31%, list=19%, signal=38%
GO_REGULATION_OF_BMP_SIGNALING_PATHWAY	40	-0.257301	-0.879341	0.602564	1	1	1081	tags=18%, list=10%, signal=19%
GO_RESPONSE_TO_EXTRACELLULAR_STIMULUS	255	-0.181642	-0.87829	0.785851	1	1	2407	tags=27%, list=22%, signal=34%
GO_MYELIN_SHEATH	97	-0.222562	-0.877617	0.618182	1	1	2961	tags=35%, list=27%, signal=48%
GO_GLUTAMINE_FAMILY_AMINO_ACID_METABOLIC_PROCESS	33	-0.259359	-0.877006	0.639847	1	1	1429	tags=21%, list=13%, signal=24%
GO_REGULATION_OF_PROTEIN_OLIGOMERIZATION	17	-0.294213	-0.876719	0.631791	1	1	1646	tags=24%, list=15%, signal=28%
GO_DIENCEPHALON_DEVELOPMENT	45	-0.247041	-0.876156	0.647638	1	1	1899	tags=29%, list=18%, signal=35%
GO_PROTEIN_TRANSPORTER_ACTIVITY	59	-0.220494	-0.875668	0.654691	1	1	1684	tags=19%, list=16%, signal=22%
GO_DEVELOPMENTAL_PIGMENTATION	19	-0.332054	-0.873819	0.558366	1	1	1654	tags=21%, list=15%, signal=25%
GO_GLUTAMATE_RECEPTOR_BINDING	22	-0.272548	-0.873395	0.655391	1	1	1268	tags=18%, list=12%, signal=21%
GO_RESPONSE_TO_STEROL	17	-0.289331	-0.873338	0.605096	1	1	1526	tags=24%, list=14%, signal=27%
GO_POSITIVE_REGULATION_OF_POTASSIUM_ION_TRANSPORT	21	-0.276349	-0.869085	0.655512	1	1	2853	tags=43%, list=26%, signal=58%
GO_REACTIVE_OXYGEN_SPECIES_METABOLIC_PROCESS	58	-0.228522	-0.868745	0.665306	1	1	2138	tags=26%, list=20%, signal=32%
GO_RECIPROCAL_DNA_RECOMBINATION	21	-0.295327	-0.866941	0.621118	1	1	1975	tags=24%, list=18%, signal=29%
GO_POTASSIUM_CHANNEL_REGULATOR_ACTIVITY	33	-0.248763	-0.866914	0.666667	1	1	558	tags=15%, list=5%, signal=16%
GO_SITE_OF_POLARIZED_GROWTH	92	-0.206159	-0.866276	0.672515	1	1	2953	tags=35%, list=27%, signal=47%
GO_NEGATIVE_REGULATION_OF_TRANSFERASE_ACTIVITY	213	-0.17607	-0.865811	0.738614	1	1	2660	tags=27%, list=25%, signal=35%
GO_CELL_PROJECTION_ORGANIZATION	495	-0.177081	-0.865211	0.745303	1	1	2391	tags=26%, list=22%, signal=32%
GO_POSITIVE_REGULATION_OF_PEPTIDYL_SERINE_PHOSPHORYLATION	42	-0.243566	-0.863727	0.675052	1	1	2247	tags=26%, list=21%, signal=33%
GO_ESTABLISHMENT_OF_PROTEIN_LOCALIZATION_TO_PLASMA_MEMBRANE	49	-0.224023	-0.863429	0.7	1	1	2171	tags=29%, list=20%, signal=36%
GO_MODULATION_OF_SYNAPTIC_TRANSMISSION	160	-0.200528	-0.862914	0.745868	1	1	1580	tags=19%, list=15%, signal=22%
GO_REGULATION_OF_DENDRITIC_SPINE_DEVELOPMENT	32	-0.240635	-0.86289	0.676892	1	1	2084	tags=31%, list=19%, signal=39%
GO_REGULATION_OF_INSULIN_SECRETION_INVOLVED_IN_CELLULAR_RESPONSE_TO_GLUCOSE_STIMULUS	28	-0.251376	-0.862417	0.655983	1	1	2378	tags=32%, list=22%, signal=41%
GO_KIDNEY_EPITHELIUM_DEVELOPMENT	75	-0.239368	-0.862215	0.647558	1	1	2508	tags=32%, list=23%, signal=41%
GO_NUCLEOBASE_CONTAINING_SMALL_MOLECULE_METABOLIC_PROCESS	297	-0.196662	-0.860874	0.631579	1	1	2862	tags=31%, list=26%, signal=41%
GO_MONOCARBOXYLIC_ACID_CATABOLIC_PROCESS	60	-0.238943	-0.860418	0.65251	1	1	1522	tags=22%, list=14%, signal=25%
GO_REGULATION_OF_CELL_DEVELOPMENT	475	-0.180504	-0.860319	0.715746	1	1	1701	tags=20%, list=16%, signal=23%
GO_CYTOPLASMIC_SEQUESTERING_OF_PROTEIN	19	-0.269784	-0.859809	0.661323	1	1	749	tags=16%, list=7%, signal=17%
GO_SNRNA_BINDING	17	-0.303211	-0.859223	0.621832	1	1	1779	tags=29%, list=16%, signal=35%
GO_HISTONE_LYSINE_N_METHYLTRANSFERASE_ACTIVITY	21	-0.284219	-0.85902	0.623016	1	1	1756	tags=29%, list=16%, signal=34%
GO_CELL_BODY	285	-0.178868	-0.858388	0.778905	1	1	1699	tags=18%, list=16%, signal=21%
GO_REGULATION_OF_G_PROTEIN_COUPLED_RECEPTOR_PROTEIN_SIGNALING_PATHWAY	69	-0.210751	-0.85829	0.703488	1	1	1321	tags=17%, list=12%, signal=20%
GO_POSITIVE_REGULATION_OF_TRANSMEMBRANE_RECEPTOR_PROTEIN_SERINE_THREONINE_KINASE_SIGNALING_PATHWAY	59	-0.232186	-0.858087	0.688889	1	1	800	tags=15%, list=7%, signal=16%
GO_CELLULAR_PROTEIN_COMPLEX_DISASSEMBLY	71	-0.250598	-0.858022	0.611632	1	1	3283	tags=44%, list=30%, signal=62%
GO_LIPID_OXIDATION	40	-0.247327	-0.857851	0.643863	1	1	2069	tags=30%, list=19%, signal=37%
GO_POSITIVE_REGULATION_OF_FAT_CELL_DIFFERENTIATION	31	-0.265301	-0.856684	0.63048	1	1	1936	tags=32%, list=18%, signal=39%
GO_DEVELOPMENTAL_GROWTH_INVOLVED_IN_MORPHOGENESIS	69	-0.223528	-0.856244	0.683367	1	1	1739	tags=22%, list=16%, signal=26%
GO_CELLULAR_RESPONSE_TO_TOPOLOGICALLY_INCORRECT_PROTEIN	60	-0.226095	-0.855895	0.652778	1	1	1857	tags=18%, list=17%, signal=22%
GO_MAMMARY_GLAND_DEVELOPMENT	71	-0.218887	-0.855796	0.693227	1	1	1359	tags=18%, list=13%, signal=21%
GO_ORGAN_FORMATION	20	-0.302349	-0.855653	0.651992	1	1	1739	tags=30%, list=16%, signal=36%
GO_CORECEPTOR_ACTIVITY	17	-0.297203	-0.854832	0.63617	1	1	225	tags=18%, list=2%, signal=18%
GO_NEGATIVE_REGULATION_OF_INTRACELLULAR_TRANSPORT	75	-0.206349	-0.854425	0.729508	1	1	1798	tags=23%, list=17%, signal=27%
GO_REPLACEMENT_OSSIFICATION	17	-0.286198	-0.854332	0.633401	1	1	1786	tags=29%, list=16%, signal=35%
GO_CEREBELLAR_CORTEX_DEVELOPMENT	26	-0.266609	-0.854266	0.637827	1	1	658	tags=15%, list=6%, signal=16%
GO_REGULATION_OF_CATABOLIC_PROCESS	417	-0.165698	-0.85421	0.796407	1	1	1790	tags=18%, list=17%, signal=21%
GO_CELLULAR_RESPONSE_TO_NUTRIENT	22	-0.271827	-0.853856	0.648033	1	1	3027	tags=45%, list=28%, signal=63%
GO_CELL_MORPHOGENESIS_INVOLVED_IN_DIFFERENTIATION	303	-0.192015	-0.853497	0.7251	1	1	2040	tags=23%, list=19%, signal=28%
GO_RNA_METHYLTRANSFERASE_ACTIVITY	17	-0.306293	-0.853002	0.616731	1	1	1590	tags=24%, list=15%, signal=28%
GO_REGULATION_OF_SMOOTHENED_SIGNALING_PATHWAY	44	-0.250024	-0.852273	0.658537	1	1	2035	tags=30%, list=19%, signal=36%
GO_NEUROTRANSMITTER_TRANSPORT	78	-0.21516	-0.851724	0.734531	1	1	1270	tags=21%, list=12%, signal=23%
GO_NEGATIVE_REGULATION_OF_MUSCLE_TISSUE_DEVELOPMENT	23	-0.263543	-0.85164	0.727984	1	1	1743	tags=30%, list=16%, signal=36%
GO_PALMITOYLTRANSFERASE_ACTIVITY	19	-0.277493	-0.851314	0.680808	1	1	2774	tags=37%, list=26%, signal=49%
GO_POSITIVE_REGULATION_OF_CELLULAR_RESPONSE_TO_TRANSFORMING_GROWTH_FACTOR_BETA_STIMULUS	18	-0.276283	-0.851183	0.672549	1	1	615	tags=17%, list=6%, signal=18%
GO_SODIUM_CHANNEL_ACTIVITY	15	-0.308318	-0.850699	0.661826	1	1	2110	tags=33%, list=19%, signal=41%
GO_MORPHOGENESIS_OF_EMBRYONIC_EPITHELIUM	82	-0.21502	-0.850666	0.689796	1	1	1936	tags=24%, list=18%, signal=29%
GO_HYDROLASE_ACTIVITY_ACTING_ON_CARBON_NITROGEN_BUT_NOT_PEPTIDE_BONDS_IN_LINEAR_AMIDES	49	-0.213111	-0.850247	0.736842	1	1	1336	tags=14%, list=12%, signal=16%
GO_REGULATION_OF_PROTEIN_BINDING	116	-0.190072	-0.849827	0.735955	1	1	2147	tags=22%, list=20%, signal=27%
GO_MANNOSYLATION	15	-0.31013	-0.849234	0.629559	1	1	981	tags=20%, list=9%, signal=22%
GO_TUBE_MORPHOGENESIS	186	-0.202452	-0.849226	0.670808	1	1	1985	tags=23%, list=18%, signal=27%
GO_RNA_POLYMERASE_II_REPRESSING_TRANSCRIPTION_FACTOR_BINDING	17	-0.285354	-0.849074	0.647799	1	1	3419	tags=53%, list=32%, signal=77%
GO_AXON_PART	121	-0.201801	-0.848982	0.724138	1	1	1632	tags=18%, list=15%, signal=21%
GO_TRANSPORTER_COMPLEX	171	-0.197765	-0.848497	0.706349	1	1	2125	tags=25%, list=20%, signal=30%
GO_REGULATION_OF_RHODOPSIN_MEDIATED_SIGNALING_PATHWAY	17	-0.285179	-0.848123	0.681909	1	1	2261	tags=29%, list=21%, signal=37%
GO_REGULATION_OF_FIBROBLAST_PROLIFERATION	48	-0.21751	-0.846881	0.699374	1	1	1798	tags=23%, list=17%, signal=27%
GO_NEGATIVE_REGULATION_OF_CYCLIN_DEPENDENT_PROTEIN_KINASE_ACTIVITY	16	-0.259835	-0.845513	0.664516	1	1	3019	tags=44%, list=28%, signal=61%
GO_OXIDOREDUCTASE_ACTIVITY_ACTING_ON_THE_CH_OH_GROUP_OF_DONORS_NAD_OR_NADP_AS_ACCEPTOR	67	-0.232893	-0.844993	0.686538	1	1	1884	tags=28%, list=17%, signal=34%
GO_COFACTOR_TRANSPORT	16	-0.308808	-0.843987	0.663462	1	1	2071	tags=31%, list=19%, signal=39%
GO_SPINAL_CORD_DEVELOPMENT	64	-0.223495	-0.842976	0.725869	1	1	2284	tags=30%, list=21%, signal=37%
GO_NEGATIVE_REGULATION_OF_INTRACELLULAR_PROTEIN_TRANSPORT	49	-0.218316	-0.842973	0.720792	1	1	1038	tags=16%, list=10%, signal=18%
GO_NEGATIVE_REGULATION_OF_EPITHELIAL_CELL_PROLIFERATION	67	-0.213893	-0.842763	0.724426	1	1	2570	tags=36%, list=24%, signal=47%
GO_POSITIVE_REGULATION_OF_CELL_CYCLE_PHASE_TRANSITION	40	-0.234805	-0.842637	0.702041	1	1	1299	tags=18%, list=12%, signal=20%
GO_LIPID_HOMEOSTASIS	61	-0.217648	-0.841858	0.723197	1	1	1526	tags=23%, list=14%, signal=27%
GO_CEREBELLAR_CORTEX_MORPHOGENESIS	20	-0.271456	-0.840291	0.686627	1	1	1320	tags=20%, list=12%, signal=23%
GO_NEGATIVE_REGULATION_OF_EPITHELIAL_CELL_DIFFERENTIATION	27	-0.247049	-0.839373	0.665289	1	1	1320	tags=19%, list=12%, signal=21%
GO_REGULATION_OF_CARDIAC_MUSCLE_TISSUE_DEVELOPMENT	32	-0.24971	-0.839277	0.720081	1	1	1743	tags=25%, list=16%, signal=30%
GO_RESPONSE_TO_AMINE	26	-0.247133	-0.839144	0.704082	1	1	1188	tags=19%, list=11%, signal=22%
GO_PRIMARY_CILIUM	106	-0.204646	-0.838526	0.72179	1	1	1363	tags=18%, list=13%, signal=20%
GO_STEROL_BIOSYNTHETIC_PROCESS	26	-0.282351	-0.837651	0.629032	1	1	352	tags=12%, list=3%, signal=12%
GO_REGULATION_OF_FAT_CELL_DIFFERENTIATION	66	-0.221156	-0.837649	0.707113	1	1	524	tags=12%, list=5%, signal=13%
GO_NEGATIVE_REGULATION_OF_STRESS_ACTIVATED_PROTEIN_KINASE_SIGNALING_CASCADE	28	-0.246816	-0.837379	0.691992	1	1	2496	tags=36%, list=23%, signal=46%
GO_REGULATION_OF_FATTY_ACID_TRANSPORT	17	-0.281748	-0.836965	0.714012	1	1	1354	tags=24%, list=13%, signal=27%
GO_REGULATION_OF_CELL_JUNCTION_ASSEMBLY	41	-0.225836	-0.835815	0.689938	1	1	1697	tags=22%, list=16%, signal=26%
GO_MUSCLE_SYSTEM_PROCESS	166	-0.206012	-0.835114	0.705637	1	1	1221	tags=17%, list=11%, signal=19%
GO_REGULATION_OF_PROTEIN_SUMOYLATION	15	-0.294487	-0.834375	0.65415	1	1	1046	tags=20%, list=10%, signal=22%
GO_POSITIVE_REGULATION_OF_ENDOTHELIAL_CELL_PROLIFERATION	39	-0.224398	-0.834341	0.73125	1	1	1359	tags=21%, list=13%, signal=23%
GO_EMBRYONIC_AXIS_SPECIFICATION	21	-0.268792	-0.834021	0.699561	1	1	615	tags=14%, list=6%, signal=15%
GO_REGULATION_OF_MITOCHONDRIAL_OUTER_MEMBRANE_PERMEABILIZATION_INVOLVED_IN_APOPTOTIC_SIGNALING_PATHWAY	22	-0.272449	-0.833671	0.662791	1	1	3755	tags=45%, list=35%, signal=69%
GO_CUL4_RING_E3_UBIQUITIN_LIGASE_COMPLEX	16	-0.302525	-0.833407	0.66004	1	1	1889	tags=25%, list=17%, signal=30%
GO_REGULATION_OF_AMINE_TRANSPORT	39	-0.248547	-0.832941	0.690871	1	1	1578	tags=26%, list=15%, signal=30%
GO_ACTININ_BINDING	19	-0.293811	-0.832542	0.682093	1	1	903	tags=16%, list=8%, signal=17%
GO_REGULATION_OF_MITOCHONDRIAL_MEMBRANE_POTENTIAL	32	-0.235295	-0.832185	0.682	1	1	2138	tags=28%, list=20%, signal=35%
GO_EMBRYONIC_ORGAN_DEVELOPMENT	243	-0.194134	-0.832183	0.712474	1	1	1881	tags=21%, list=17%, signal=25%
GO_ACTIVE_ION_TRANSMEMBRANE_TRANSPORTER_ACTIVITY	89	-0.198946	-0.832162	0.745418	1	1	2911	tags=33%, list=27%, signal=44%
GO_RESPONSE_TO_XENOBIOTIC_STIMULUS	47	-0.258924	-0.831426	0.716446	1	1	2129	tags=30%, list=20%, signal=37%
GO_ALCOHOL_BINDING	50	-0.226065	-0.831295	0.740964	1	1	1705	tags=24%, list=16%, signal=28%
GO_VESICLE_DOCKING_INVOLVED_IN_EXOCYTOSIS	18	-0.305056	-0.83118	0.656189	1	1	2670	tags=44%, list=25%, signal=59%
GO_SYNAPSE_PART	338	-0.175987	-0.830644	0.846743	1	1	1305	tags=14%, list=12%, signal=16%
GO_NEUROLOGICAL_SYSTEM_PROCESS	454	-0.169125	-0.830184	0.870021	1	1	1586	tags=18%, list=15%, signal=20%
GO_REGULATION_OF_CYCLIN_DEPENDENT_PROTEIN_KINASE_ACTIVITY	56	-0.202591	-0.830081	0.739035	1	1	3107	tags=43%, list=29%, signal=60%
GO_CYTOSKELETON_DEPENDENT_INTRACELLULAR_TRANSPORT	72	-0.211986	-0.827991	0.706004	1	1	2508	tags=26%, list=23%, signal=34%
GO_DEOXYRIBONUCLEASE_ACTIVITY	40	-0.239657	-0.827238	0.671287	1	1	1975	tags=23%, list=18%, signal=27%
GO_TRANSCRIPTION_FROM_RNA_POLYMERASE_I_PROMOTER	18	-0.288274	-0.82602	0.668724	1	1	3708	tags=50%, list=34%, signal=76%
GO_POSITIVE_REGULATION_OF_MRNA_METABOLIC_PROCESS	28	-0.256613	-0.825916	0.693712	1	1	3137	tags=39%, list=29%, signal=55%
GO_REGULATION_OF_PHOSPHATASE_ACTIVITY	72	-0.19169	-0.825768	0.780738	1	1	2521	tags=29%, list=23%, signal=38%
GO_PROTEIN_K63_LINKED_UBIQUITINATION	20	-0.246441	-0.825587	0.736538	1	1	712	tags=15%, list=7%, signal=16%
GO_KIDNEY_MORPHOGENESIS	49	-0.233293	-0.824998	0.722772	1	1	1320	tags=24%, list=12%, signal=28%
GO_POSITIVE_REGULATION_OF_TRANSMEMBRANE_TRANSPORT	73	-0.201072	-0.824334	0.77234	1	1	1339	tags=19%, list=12%, signal=22%
GO_SUPEROXIDE_METABOLIC_PROCESS	20	-0.266336	-0.824128	0.709474	1	1	3579	tags=50%, list=33%, signal=75%
GO_INTRINSIC_APOPTOTIC_SIGNALING_PATHWAY_IN_RESPONSE_TO_ENDOPLASMIC_RETICULUM_STRESS	17	-0.270926	-0.823961	0.708812	1	1	1646	tags=29%, list=15%, signal=35%
GO_POSITIVE_REGULATION_OF_INSULIN_SECRETION	34	-0.238078	-0.823816	0.740586	1	1	1566	tags=24%, list=14%, signal=27%
GO_ADHERENS_JUNCTION_ASSEMBLY	25	-0.261398	-0.823701	0.694611	1	1	1081	tags=16%, list=10%, signal=18%
GO_SECRETORY_GRANULE_LUMEN	51	-0.261933	-0.823686	0.692632	1	1	2952	tags=43%, list=27%, signal=59%
GO_REGULATION_OF_CELLULAR_RESPONSE_TO_GROWTH_FACTOR_STIMULUS	135	-0.201418	-0.823576	0.73176	1	1	827	tags=14%, list=8%, signal=15%
GO_CELLULAR_RESPONSE_TO_VASCULAR_ENDOTHELIAL_GROWTH_FACTOR_STIMULUS	15	-0.284049	-0.82356	0.668687	1	1	1765	tags=27%, list=16%, signal=32%
GO_ACETYLGLUCOSAMINYLTRANSFERASE_ACTIVITY	28	-0.233836	-0.823526	0.694553	1	1	1641	tags=25%, list=15%, signal=29%
GO_HEAD_DEVELOPMENT	421	-0.177329	-0.823378	0.818947	1	1	2070	tags=22%, list=19%, signal=26%
GO_ALPHA_AMINO_ACID_CATABOLIC_PROCESS	52	-0.227299	-0.823187	0.742366	1	1	1353	tags=17%, list=12%, signal=20%
GO_SYNAPSE	421	-0.172898	-0.823007	0.837891	1	1	2084	tags=21%, list=19%, signal=25%
GO_NITROGEN_COMPOUND_TRANSPORT	275	-0.167067	-0.822998	0.906561	1	1	2105	tags=23%, list=19%, signal=27%
GO_MORPHOGENESIS_OF_A_POLARIZED_EPITHELIUM	15	-0.279354	-0.822126	0.689162	1	1	375	tags=13%, list=3%, signal=14%
GO_REGULATION_OF_TRANSLATIONAL_INITIATION	45	-0.229426	-0.821979	0.681909	1	1	2531	tags=29%, list=23%, signal=38%
GO_FIBROBLAST_GROWTH_FACTOR_RECEPTOR_SIGNALING_PATHWAY	42	-0.218249	-0.821883	0.756646	1	1	1779	tags=21%, list=16%, signal=26%
GO_ORGANIC_ACID_TRANSMEMBRANE_TRANSPORTER_ACTIVITY	73	-0.205036	-0.821839	0.761134	1	1	2486	tags=33%, list=23%, signal=42%
GO_REGULATION_OF_MORPHOGENESIS_OF_A_BRANCHING_STRUCTURE	30	-0.242859	-0.821587	0.747433	1	1	1897	tags=30%, list=18%, signal=36%
GO_SINGLE_ORGANISM_BEHAVIOR	223	-0.177944	-0.82004	0.826962	1	1	1578	tags=18%, list=15%, signal=21%
GO_HISTONE_METHYLATION	39	-0.242925	-0.819912	0.695296	1	1	1761	tags=23%, list=16%, signal=27%
GO_POSITIVE_REGULATION_OF_ORGAN_GROWTH	25	-0.252574	-0.819383	0.746862	1	1	1899	tags=28%, list=18%, signal=34%
GO_HISTONE_MRNA_METABOLIC_PROCESS	19	-0.29707	-0.819274	0.676171	1	1	1779	tags=26%, list=16%, signal=31%
GO_IRE1_MEDIATED_UNFOLDED_PROTEIN_RESPONSE	33	-0.260317	-0.819228	0.672447	1	1	1538	tags=15%, list=14%, signal=18%
GO_MESODERM_MORPHOGENESIS	38	-0.23403	-0.818689	0.72167	1	1	1789	tags=24%, list=17%, signal=28%
GO_GLYCOSAMINOGLYCAN_BINDING	122	-0.221138	-0.818083	0.728571	1	1	1334	tags=20%, list=12%, signal=22%
GO_POSITIVE_REGULATION_OF_CATION_TRANSMEMBRANE_TRANSPORT	54	-0.208125	-0.817986	0.767094	1	1	3056	tags=39%, list=28%, signal=54%
GO_NEURON_SPINE	64	-0.197208	-0.81797	0.769231	1	1	3125	tags=39%, list=29%, signal=55%
GO_ARTERY_MORPHOGENESIS	25	-0.276886	-0.817931	0.704918	1	1	3370	tags=56%, list=31%, signal=81%
GO_DNA_DIRECTED_DNA_POLYMERASE_ACTIVITY	18	-0.271214	-0.817758	0.688129	1	1	355	tags=11%, list=3%, signal=11%
GO_PITUITARY_GLAND_DEVELOPMENT	24	-0.26675	-0.817643	0.728543	1	1	949	tags=21%, list=9%, signal=23%
GO_EXOCRINE_SYSTEM_DEVELOPMENT	27	-0.261424	-0.817012	0.729897	1	1	2201	tags=37%, list=20%, signal=46%
GO_RAC_GTPASE_BINDING	24	-0.238357	-0.81656	0.683794	1	1	1775	tags=21%, list=16%, signal=25%
GO_RESPONSE_TO_ENDOPLASMIC_RETICULUM_STRESS	131	-0.186178	-0.816284	0.760994	1	1	2041	tags=18%, list=19%, signal=22%
GO_REGULATION_OF_NEUROTRANSMITTER_LEVELS	97	-0.198363	-0.815775	0.780591	1	1	1834	tags=23%, list=17%, signal=27%
GO_SPECIFICATION_OF_SYMMETRY	69	-0.219435	-0.815696	0.719057	1	1	2592	tags=32%, list=24%, signal=42%
GO_PHOSPHOLIPID_METABOLIC_PROCESS	205	-0.172718	-0.815522	0.814229	1	1	2194	tags=22%, list=20%, signal=28%
GO_PROTEIN_DEACETYLASE_ACTIVITY	23	-0.245303	-0.814838	0.711693	1	1	1722	tags=17%, list=16%, signal=21%
GO_REGULATION_OF_ORGAN_MORPHOGENESIS	137	-0.188048	-0.813993	0.770021	1	1	2007	tags=24%, list=19%, signal=29%
GO_REGULATION_OF_RELEASE_OF_CYTOCHROME_C_FROM_MITOCHONDRIA	27	-0.280219	-0.813078	0.666667	1	1	1646	tags=22%, list=15%, signal=26%
GO_ORGAN_GROWTH	38	-0.237698	-0.812979	0.700624	1	1	1746	tags=24%, list=16%, signal=28%
GO_REGULATION_OF_NEURON_APOPTOTIC_PROCESS	114	-0.173818	-0.811757	0.86166	1	1	3020	tags=31%, list=28%, signal=42%
GO_REGULATION_OF_EPIDERMIS_DEVELOPMENT	34	-0.243093	-0.811619	0.737805	1	1	2201	tags=29%, list=20%, signal=37%
GO_NEGATIVE_REGULATION_OF_NUCLEOCYTOPLASMIC_TRANSPORT	39	-0.21639	-0.810108	0.780876	1	1	1977	tags=23%, list=18%, signal=28%
GO_NEGATIVE_REGULATION_OF_NEURON_APOPTOTIC_PROCESS	74	-0.193545	-0.809601	0.82839	1	1	2244	tags=24%, list=21%, signal=30%
GO_PEPTIDYL_ASPARAGINE_MODIFICATION	24	-0.251794	-0.808684	0.705545	1	1	2442	tags=25%, list=23%, signal=32%
GO_LIPOPROTEIN_METABOLIC_PROCESS	74	-0.192415	-0.808294	0.788235	1	1	1538	tags=18%, list=14%, signal=20%
GO_SPINAL_CORD_MOTOR_NEURON_DIFFERENTIATION	20	-0.273945	-0.807914	0.715953	1	1	1986	tags=35%, list=18%, signal=43%
GO_HEPARIN_BINDING	97	-0.223683	-0.806618	0.753112	1	1	1334	tags=21%, list=12%, signal=23%
GO_REGULATION_OF_VACUOLE_ORGANIZATION	21	-0.260356	-0.806116	0.685371	1	1	2785	tags=33%, list=26%, signal=45%
GO_REGULATION_OF_CARBOHYDRATE_BIOSYNTHETIC_PROCESS	54	-0.205823	-0.805352	0.828866	1	1	1265	tags=17%, list=12%, signal=19%
GO_NUCLEOID	25	-0.279571	-0.805114	0.670433	1	1	2127	tags=24%, list=20%, signal=30%
GO_REGULATION_OF_EPITHELIAL_CELL_PROLIFERATION	166	-0.184494	-0.804376	0.809111	1	1	2201	tags=28%, list=20%, signal=34%
GO_VIRAL_LIFE_CYCLE	168	-0.203205	-0.803999	0.619522	1	1	2870	tags=37%, list=27%, signal=49%
GO_CELLULAR_KETONE_METABOLIC_PROCESS	36	-0.260837	-0.803759	0.762745	1	1	1929	tags=28%, list=18%, signal=34%
GO_AXIS_SPECIFICATION	60	-0.208939	-0.803083	0.775051	1	1	717	tags=13%, list=7%, signal=14%
GO_LACTATION	21	-0.256523	-0.802384	0.754065	1	1	597	tags=14%, list=6%, signal=15%
GO_PALATE_DEVELOPMENT	56	-0.223607	-0.801932	0.73904	1	1	1840	tags=21%, list=17%, signal=26%
GO_REGULATION_OF_DNA_DAMAGE_RESPONSE_SIGNAL_TRANSDUCTION_BY_P53_CLASS_MEDIATOR	18	-0.260487	-0.801471	0.74375	1	1	2684	tags=33%, list=25%, signal=44%
GO_NEGATIVE_REGULATION_OF_TRANSPORTER_ACTIVITY	33	-0.231325	-0.801123	0.764454	1	1	1781	tags=24%, list=16%, signal=29%
GO_MACROMOLECULAR_COMPLEX_DISASSEMBLY	110	-0.200502	-0.800088	0.706334	1	1	3283	tags=38%, list=30%, signal=54%
GO_MESODERM_DEVELOPMENT	71	-0.203356	-0.799437	0.792829	1	1	1789	tags=24%, list=17%, signal=28%
GO_TRANSFERASE_ACTIVITY_TRANSFERRING_ONE_CARBON_GROUPS	104	-0.184073	-0.79942	0.812253	1	1	1761	tags=18%, list=16%, signal=22%
GO_VACUOLE_ORGANIZATION	99	-0.194976	-0.798923	0.755218	1	1	2972	tags=33%, list=27%, signal=46%
GO_PCG_PROTEIN_COMPLEX	30	-0.251439	-0.798342	0.67	1	1	2626	tags=30%, list=24%, signal=39%
GO_METHYLATION	134	-0.181055	-0.798211	0.827519	1	1	1761	tags=19%, list=16%, signal=22%
GO_REGULATION_OF_DENDRITE_DEVELOPMENT	74	-0.195386	-0.798159	0.802495	1	1	2084	tags=26%, list=19%, signal=32%
GO_SPLICEOSOMAL_COMPLEX_ASSEMBLY	27	-0.262616	-0.797926	0.664016	1	1	3396	tags=48%, list=31%, signal=70%
GO_CILIUM	245	-0.176867	-0.797741	0.805501	1	1	2391	tags=26%, list=22%, signal=32%
GO_ACTIVE_TRANSMEMBRANE_TRANSPORTER_ACTIVITY	188	-0.1767	-0.796961	0.851153	1	1	1842	tags=19%, list=17%, signal=23%
GO_PRIMARY_ALCOHOL_METABOLIC_PROCESS	24	-0.274922	-0.796951	0.774704	1	1	2122	tags=38%, list=20%, signal=47%
GO_CARBOHYDRATE_DERIVATIVE_CATABOLIC_PROCESS	98	-0.196389	-0.796677	0.801961	1	1	1111	tags=14%, list=10%, signal=16%
GO_POSTSYNAPSE	215	-0.17253	-0.796232	0.861328	1	1	1305	tags=14%, list=12%, signal=16%
GO_INTRINSIC_COMPONENT_OF_MITOCHONDRIAL_MEMBRANE	30	-0.246315	-0.795911	0.712928	1	1	3111	tags=37%, list=29%, signal=51%
GO_ORGANIC_ANION_TRANSMEMBRANE_TRANSPORTER_ACTIVITY	87	-0.192553	-0.795894	0.863354	1	1	2486	tags=32%, list=23%, signal=41%
GO_PHOTORECEPTOR_CELL_DEVELOPMENT	19	-0.258545	-0.795364	0.756487	1	1	716	tags=16%, list=7%, signal=17%
GO_INOSITOL_PHOSPHATE_METABOLIC_PROCESS	30	-0.222012	-0.79309	0.771894	1	1	1363	tags=20%, list=13%, signal=23%
GO_SENSORY_PERCEPTION_OF_LIGHT_STIMULUS	112	-0.179296	-0.791948	0.857143	1	1	1419	tags=15%, list=13%, signal=17%
GO_ISOPRENOID_BIOSYNTHETIC_PROCESS	16	-0.2811	-0.791551	0.740234	1	1	799	tags=19%, list=7%, signal=20%
GO_SYNAPTIC_TRANSMISSION_GLUTAMATERGIC	17	-0.269571	-0.791506	0.732039	1	1	1270	tags=18%, list=12%, signal=20%
GO_CELLULAR_AMINO_ACID_CATABOLIC_PROCESS	64	-0.209687	-0.79149	0.794971	1	1	2606	tags=28%, list=24%, signal=37%
GO_NEUROMUSCULAR_JUNCTION	26	-0.256225	-0.79034	0.766046	1	1	2928	tags=42%, list=27%, signal=58%
GO_DENDRITE_DEVELOPMENT	42	-0.209236	-0.790178	0.813121	1	1	2244	tags=29%, list=21%, signal=36%
GO_MRNA_PROCESSING	232	-0.200017	-0.790068	0.712274	1	1	3026	tags=33%, list=28%, signal=45%
GO_SENSORY_ORGAN_DEVELOPMENT	283	-0.177203	-0.788748	0.846004	1	1	1881	tags=20%, list=17%, signal=24%
GO_EMBRYONIC_PATTERN_SPECIFICATION	37	-0.234578	-0.787849	0.72093	1	1	691	tags=14%, list=6%, signal=14%
GO_CRANIAL_SKELETAL_SYSTEM_DEVELOPMENT	35	-0.234618	-0.787246	0.755511	1	1	1739	tags=26%, list=16%, signal=31%
GO_CELLULAR_RESPONSE_TO_GLUCAGON_STIMULUS	24	-0.241915	-0.787175	0.791667	1	1	2127	tags=33%, list=20%, signal=41%
GO_DRUG_TRANSPORT	16	-0.282164	-0.787163	0.727447	1	1	1162	tags=19%, list=11%, signal=21%
GO_DNA_REPAIR_COMPLEX	25	-0.245751	-0.787088	0.745455	1	1	355	tags=8%, list=3%, signal=8%
GO_GASTRULATION	92	-0.190797	-0.786725	0.816842	1	1	1789	tags=22%, list=17%, signal=26%
GO_ORGANELLE_ENVELOPE_LUMEN	48	-0.251057	-0.786453	0.687851	1	1	2857	tags=40%, list=26%, signal=54%
GO_VENTRAL_SPINAL_CORD_DEVELOPMENT	25	-0.255315	-0.786077	0.732177	1	1	1048	tags=24%, list=10%, signal=27%
GO_POSITIVE_REGULATION_OF_FATTY_ACID_METABOLIC_PROCESS	21	-0.248239	-0.785744	0.784394	1	1	1507	tags=24%, list=14%, signal=28%
GO_METHYLTRANSFERASE_COMPLEX	46	-0.23379	-0.785135	0.712644	1	1	2762	tags=30%, list=26%, signal=41%
GO_NCRNA_METABOLIC_PROCESS	292	-0.213682	-0.784641	0.684008	1	1	3321	tags=38%, list=31%, signal=54%
GO_REGULATION_OF_AMINO_ACID_TRANSPORT	16	-0.273102	-0.782943	0.781377	1	1	1578	tags=31%, list=15%, signal=37%
GO_RESPONSE_TO_INTERLEUKIN_6	17	-0.250092	-0.782229	0.770459	1	1	1686	tags=24%, list=16%, signal=28%
GO_NEURON_DEVELOPMENT	378	-0.166777	-0.782052	0.867886	1	1	2040	tags=21%, list=19%, signal=25%
GO_BRUSH_BORDER_MEMBRANE	40	-0.218385	-0.781949	0.802372	1	1	1655	tags=23%, list=15%, signal=26%
GO_EMBRYONIC_MORPHOGENESIS	313	-0.178058	-0.781884	0.811441	1	1	1743	tags=19%, list=16%, signal=22%
GO_PROTEIN_FOLDING	123	-0.189794	-0.78156	0.7751	1	1	2061	tags=21%, list=19%, signal=26%
GO_ORGANIC_HYDROXY_COMPOUND_TRANSMEMBRANE_TRANSPORTER_ACTIVITY	34	-0.230862	-0.781012	0.822581	1	1	1378	tags=24%, list=13%, signal=27%
GO_REGULATION_OF_RESPONSE_TO_OXIDATIVE_STRESS	33	-0.217879	-0.780858	0.813492	1	1	2495	tags=27%, list=23%, signal=35%
GO_ATPASE_ACTIVITY_COUPLED	182	-0.170391	-0.780852	0.843254	1	1	3085	tags=32%, list=28%, signal=44%
GO_SOMITE_DEVELOPMENT	54	-0.206907	-0.780221	0.820041	1	1	2617	tags=30%, list=24%, signal=39%
GO_ORGANELLE_TRANSPORT_ALONG_MICROTUBULE	38	-0.220733	-0.77977	0.736944	1	1	2502	tags=26%, list=23%, signal=34%
GO_ENDOSOME_ORGANIZATION	36	-0.218877	-0.779221	0.763736	1	1	2934	tags=36%, list=27%, signal=49%
GO_CELLULAR_CARBOHYDRATE_METABOLIC_PROCESS	97	-0.183071	-0.778733	0.867589	1	1	3413	tags=41%, list=32%, signal=60%
GO_PROTEIN_EXPORT_FROM_NUCLEUS	19	-0.246838	-0.778339	0.783784	1	1	2402	tags=26%, list=22%, signal=34%
GO_REGULATION_OF_SODIUM_ION_TRANSPORT	42	-0.216328	-0.778043	0.817623	1	1	1282	tags=17%, list=12%, signal=19%
GO_NEURON_DIFFERENTIATION	496	-0.165572	-0.776177	0.892495	1	1	1899	tags=20%, list=18%, signal=23%
GO_CELLULAR_RESPONSE_TO_VITAMIN	15	-0.28763	-0.774603	0.737179	1	1	1143	tags=27%, list=11%, signal=30%
GO_ANTIPORTER_ACTIVITY	36	-0.218019	-0.774079	0.807087	1	1	1058	tags=14%, list=10%, signal=15%
GO_RNA_METHYLATION	22	-0.259892	-0.773339	0.728653	1	1	1738	tags=23%, list=16%, signal=27%
GO_POSITIVE_REGULATION_OF_CATABOLIC_PROCESS	218	-0.155408	-0.772383	0.907843	1	1	1790	tags=18%, list=17%, signal=21%
GO_SMOOTH_MUSCLE_CONTRACTION	29	-0.237569	-0.77233	0.766529	1	1	1033	tags=17%, list=10%, signal=19%
GO_MESONEPHROS_DEVELOPMENT	53	-0.229697	-0.771923	0.78308	1	1	1743	tags=25%, list=16%, signal=29%
GO_MAMMARY_GLAND_DUCT_MORPHOGENESIS	15	-0.282409	-0.771814	0.743327	1	1	1897	tags=20%, list=18%, signal=24%
GO_NEGATIVE_REGULATION_OF_TRANSFORMING_GROWTH_FACTOR_BETA_RECEPTOR_SIGNALING_PATHWAY	43	-0.212853	-0.771357	0.797189	1	1	1315	tags=19%, list=12%, signal=21%
GO_TRANSMEMBRANE_RECEPTOR_PROTEIN_SERINE_THREONINE_KINASE_SIGNALING_PATHWAY	110	-0.187411	-0.769369	0.820988	1	1	1163	tags=15%, list=11%, signal=17%
GO_CARDIAC_SEPTUM_MORPHOGENESIS	34	-0.244491	-0.76852	0.772257	1	1	1743	tags=24%, list=16%, signal=28%
GO_MAGNESIUM_ION_BINDING	112	-0.169222	-0.767954	0.876866	1	1	2294	tags=24%, list=21%, signal=30%
GO_NEPHRON_DEVELOPMENT	69	-0.210739	-0.766961	0.8234	1	1	1320	tags=20%, list=12%, signal=23%
GO_REGULATION_OF_CELLULAR_SENESCENCE	20	-0.244782	-0.766678	0.797938	1	1	2375	tags=25%, list=22%, signal=32%
GO_SEGMENTATION	65	-0.193843	-0.76574	0.839175	1	1	417	tags=9%, list=4%, signal=10%
GO_POSITIVE_REGULATION_OF_WNT_SIGNALING_PATHWAY	95	-0.178643	-0.765556	0.859794	1	1	1371	tags=16%, list=13%, signal=18%
GO_LYSOSOMAL_LUMEN	51	-0.237773	-0.765396	0.713427	1	1	1692	tags=22%, list=16%, signal=25%
GO_GLUTATHIONE_TRANSFERASE_ACTIVITY	16	-0.281249	-0.765204	0.761538	1	1	175	tags=13%, list=2%, signal=13%
GO_TRIVALENT_INORGANIC_CATION_TRANSPORT	23	-0.24518	-0.764963	0.752437	1	1	1247	tags=17%, list=12%, signal=20%
GO_TRANSCRIPTIONAL_REPRESSOR_COMPLEX	38	-0.222367	-0.764653	0.792531	1	1	1414	tags=16%, list=13%, signal=18%
GO_REGULATION_OF_AUTOPHAGOSOME_ASSEMBLY	19	-0.252944	-0.764079	0.761905	1	1	2785	tags=32%, list=26%, signal=42%
GO_AMINO_ACID_TRANSPORT	66	-0.193403	-0.763218	0.86811	1	1	3047	tags=36%, list=28%, signal=50%
GO_MESODERMAL_CELL_DIFFERENTIATION	16	-0.292401	-0.761986	0.739837	1	1	1789	tags=31%, list=17%, signal=37%
GO_CELLULAR_RESPONSE_TO_CAMP	23	-0.235771	-0.760989	0.805907	1	1	684	tags=13%, list=6%, signal=14%
GO_ORGANELLE_FUSION	69	-0.186853	-0.759977	0.866667	1	1	590	tags=10%, list=5%, signal=11%
GO_NEPHRON_EPITHELIUM_DEVELOPMENT	56	-0.212218	-0.759909	0.827083	1	1	1320	tags=21%, list=12%, signal=24%
GO_MICROTUBULE_BUNDLE_FORMATION	35	-0.232766	-0.759718	0.762948	1	1	2296	tags=31%, list=21%, signal=40%
GO_NEGATIVE_REGULATION_OF_CATION_TRANSMEMBRANE_TRANSPORT	30	-0.228704	-0.759337	0.796219	1	1	1781	tags=23%, list=16%, signal=28%
GO_BETA_CATENIN_BINDING	50	-0.210643	-0.759327	0.820359	1	1	1767	tags=22%, list=16%, signal=26%
GO_RESPONSE_TO_TOPOLOGICALLY_INCORRECT_PROTEIN	87	-0.189521	-0.758943	0.819253	1	1	1968	tags=18%, list=18%, signal=22%
GO_FEMALE_MEIOTIC_DIVISION	15	-0.256101	-0.758794	0.790837	1	1	1025	tags=20%, list=9%, signal=22%
GO_CENTRAL_NERVOUS_SYSTEM_NEURON_DIFFERENTIATION	96	-0.19442	-0.758791	0.869823	1	1	1986	tags=24%, list=18%, signal=29%
GO_MICROTUBULE_BINDING	108	-0.176876	-0.758208	0.864224	1	1	2368	tags=25%, list=22%, signal=32%
GO_ORGANIC_ACID_CATABOLIC_PROCESS	119	-0.188277	-0.758146	0.854167	1	1	1522	tags=18%, list=14%, signal=20%
GO_POSITIVE_REGULATION_OF_EPITHELIAL_CELL_PROLIFERATION	92	-0.184577	-0.755804	0.897275	1	1	2194	tags=26%, list=20%, signal=32%
GO_POSITIVE_REGULATION_OF_NEURON_APOPTOTIC_PROCESS	31	-0.208905	-0.754345	0.835938	1	1	3397	tags=39%, list=31%, signal=56%
GO_POSITIVE_REGULATION_OF_SMALL_GTPASE_MEDIATED_SIGNAL_TRANSDUCTION	22	-0.246773	-0.752538	0.783505	1	1	1235	tags=23%, list=11%, signal=26%
GO_TRANSFERASE_COMPLEX_TRANSFERRING_PHOSPHORUS_CONTAINING_GROUPS	138	-0.17286	-0.750402	0.848303	1	1	629	tags=9%, list=6%, signal=10%
GO_ORGANELLE_ASSEMBLY	277	-0.15694	-0.750111	0.930057	1	1	2435	tags=26%, list=22%, signal=33%
GO_RECEPTOR_REGULATOR_ACTIVITY	24	-0.222146	-0.749847	0.821643	1	1	2319	tags=33%, list=21%, signal=42%
GO_CILIARY_MEMBRANE	38	-0.203987	-0.74967	0.835294	1	1	1320	tags=18%, list=12%, signal=21%
GO_MYOSIN_COMPLEX	36	-0.223127	-0.748748	0.802789	1	1	630	tags=14%, list=6%, signal=15%
GO_RNA_3_END_PROCESSING	62	-0.218734	-0.748517	0.733855	1	1	2230	tags=26%, list=21%, signal=32%
GO_SULFUR_AMINO_ACID_METABOLIC_PROCESS	32	-0.209736	-0.747472	0.825	1	1	448	tags=9%, list=4%, signal=10%
GO_REGULATION_OF_OLIGODENDROCYTE_DIFFERENTIATION	15	-0.244716	-0.745831	0.812236	1	1	2188	tags=33%, list=20%, signal=42%
GO_REGULATION_OF_ADHERENS_JUNCTION_ORGANIZATION	29	-0.224122	-0.745024	0.805085	1	1	2496	tags=31%, list=23%, signal=40%
GO_CEREBRAL_CORTEX_DEVELOPMENT	66	-0.196408	-0.742628	0.834677	1	1	2232	tags=27%, list=21%, signal=34%
GO_CARDIAC_CHAMBER_MORPHOGENESIS	71	-0.20714	-0.742004	0.836735	1	1	1743	tags=24%, list=16%, signal=28%
GO_REGULATION_OF_PEPTIDYL_SERINE_PHOSPHORYLATION	57	-0.194598	-0.739309	0.884368	1	1	2247	tags=25%, list=21%, signal=31%
GO_ACTIN_CYTOSKELETON_REORGANIZATION	30	-0.218301	-0.738412	0.856855	1	1	2294	tags=30%, list=21%, signal=38%
GO_NEGATIVE_REGULATION_OF_CALCIUM_ION_IMPORT	17	-0.252416	-0.737566	0.843552	1	1	1763	tags=29%, list=16%, signal=35%
GO_REGULATION_OF_ATPASE_ACTIVITY	38	-0.208143	-0.737052	0.881497	1	1	1212	tags=18%, list=11%, signal=21%
GO_REGULATION_OF_NEURON_DEATH	150	-0.155479	-0.73624	0.978557	1	1	2244	tags=21%, list=21%, signal=27%
GO_CELLULAR_PIGMENTATION	17	-0.256636	-0.736051	0.806691	1	1	3489	tags=35%, list=32%, signal=52%
GO_POSITIVE_REGULATION_OF_CELL_SUBSTRATE_ADHESION	50	-0.206269	-0.73565	0.870103	1	1	1063	tags=18%, list=10%, signal=20%
GO_NUCLEOTIDE_EXCISION_REPAIR_PREINCISION_COMPLEX_ASSEMBLY	15	-0.249846	-0.735441	0.806387	1	1	3321	tags=33%, list=31%, signal=48%
GO_SYNAPTONEMAL_COMPLEX	18	-0.25299	-0.735336	0.823529	1	1	2212	tags=33%, list=20%, signal=42%
GO_SPLICEOSOMAL_SNRNP_ASSEMBLY	17	-0.282367	-0.734796	0.76834	1	1	2762	tags=47%, list=26%, signal=63%
GO_REGULATION_OF_DENDRITE_MORPHOGENESIS	50	-0.192874	-0.733584	0.871227	1	1	2082	tags=24%, list=19%, signal=30%
GO_NEGATIVE_REGULATION_OF_CELL_GROWTH	98	-0.178327	-0.732972	0.913758	1	1	1993	tags=23%, list=18%, signal=29%
GO_BETA_TUBULIN_BINDING	21	-0.213555	-0.732791	0.82505	1	1	2359	tags=33%, list=22%, signal=43%
GO_NEGATIVE_REGULATION_OF_PROTEIN_BINDING	58	-0.182302	-0.732714	0.87931	1	1	858	tags=12%, list=8%, signal=13%
GO_POSITIVE_REGULATION_OF_HEART_GROWTH	19	-0.238791	-0.732696	0.821862	1	1	1739	tags=21%, list=16%, signal=25%
GO_SINGLE_ORGANISM_MEMBRANE_FUSION	65	-0.180018	-0.732308	0.888889	1	1	590	tags=11%, list=5%, signal=11%
GO_EYE_DEVELOPMENT	187	-0.16791	-0.732119	0.918447	1	1	1881	tags=20%, list=17%, signal=24%
GO_REGULATION_OF_DNA_TEMPLATED_TRANSCRIPTION_ELONGATION	25	-0.225212	-0.732047	0.82495	1	1	4028	tags=60%, list=37%, signal=95%
GO_REGULATION_OF_GENERATION_OF_PRECURSOR_METABOLITES_AND_ENERGY	51	-0.19167	-0.731649	0.862669	1	1	2081	tags=22%, list=19%, signal=27%
GO_MACROMOLECULE_DEACYLATION	43	-0.191355	-0.730543	0.864372	1	1	1722	tags=19%, list=16%, signal=22%
GO_NEGATIVE_REGULATION_OF_RESPONSE_TO_OXIDATIVE_STRESS	19	-0.227302	-0.730509	0.87594	1	1	2939	tags=32%, list=27%, signal=43%
GO_INTRAMOLECULAR_OXIDOREDUCTASE_ACTIVITY	31	-0.217599	-0.73049	0.831722	1	1	2351	tags=29%, list=22%, signal=37%
GO_GLOBAL_GENOME_NUCLEOTIDE_EXCISION_REPAIR	15	-0.248756	-0.7304	0.800797	1	1	122	tags=7%, list=1%, signal=7%
GO_POSITIVE_REGULATION_OF_CARDIAC_MUSCLE_TISSUE_DEVELOPMENT	20	-0.236598	-0.72973	0.859539	1	1	1739	tags=20%, list=16%, signal=24%
GO_REGULATION_OF_PROTEASOMAL_UBIQUITIN_DEPENDENT_PROTEIN_CATABOLIC_PROCESS	84	-0.170513	-0.728888	0.89959	1	1	1769	tags=17%, list=16%, signal=20%
GO_UBIQUITIN_LIKE_PROTEIN_CONJUGATING_ENZYME_ACTIVITY	21	-0.223088	-0.728734	0.832692	1	1	712	tags=14%, list=7%, signal=15%
GO_UBIQUITIN_LIKE_PROTEIN_LIGASE_BINDING	146	-0.155747	-0.727726	0.95098	1	1	1879	tags=18%, list=17%, signal=22%
GO_SALIVARY_GLAND_DEVELOPMENT	20	-0.247419	-0.727462	0.837782	1	1	3132	tags=50%, list=29%, signal=70%
GO_REGULATION_OF_DNA_TEMPLATED_TRANSCRIPTION_INITIATION	16	-0.245459	-0.727423	0.836066	1	1	1997	tags=25%, list=18%, signal=31%
GO_CELL_JUNCTION_ASSEMBLY	72	-0.188683	-0.726121	0.834646	1	1	2770	tags=29%, list=26%, signal=39%
GO_CARBOHYDRATE_KINASE_ACTIVITY	16	-0.25663	-0.725719	0.823643	1	1	3407	tags=56%, list=31%, signal=82%
GO_SPLEEN_DEVELOPMENT	20	-0.230559	-0.725688	0.843373	1	1	196	tags=10%, list=2%, signal=10%
GO_RENAL_TUBULE_DEVELOPMENT	47	-0.203625	-0.724477	0.898305	1	1	1299	tags=21%, list=12%, signal=24%
GO_RESPONSE_TO_AMPHETAMINE	20	-0.232593	-0.724097	0.860417	1	1	1188	tags=15%, list=11%, signal=17%
GO_REGULATION_OF_OSTEOBLAST_DIFFERENTIATION	62	-0.199229	-0.723876	0.850746	1	1	2208	tags=26%, list=20%, signal=32%
GO_NEURON_PROJECTION_REGENERATION	16	-0.238242	-0.723863	0.863544	1	1	492	tags=13%, list=5%, signal=13%
GO_REGULATION_OF_MRNA_SPLICING_VIA_SPLICEOSOME	35	-0.233124	-0.723818	0.800403	1	1	3018	tags=34%, list=28%, signal=47%
GO_REGULATION_OF_ENDOPLASMIC_RETICULUM_STRESS_INDUCED_INTRINSIC_APOPTOTIC_SIGNALING_PATHWAY	15	-0.251358	-0.723788	0.815789	1	1	1535	tags=20%, list=14%, signal=23%
GO_FATTY_ACID_CATABOLIC_PROCESS	43	-0.211267	-0.722671	0.836693	1	1	2069	tags=26%, list=19%, signal=31%
GO_U2_TYPE_SPLICEOSOMAL_COMPLEX	17	-0.251303	-0.722071	0.783567	1	1	2997	tags=41%, list=28%, signal=57%
GO_REGULATION_OF_CARDIAC_CONDUCTION	36	-0.205328	-0.721737	0.858628	1	1	1763	tags=22%, list=16%, signal=26%
GO_REGULATION_OF_GASTRULATION	17	-0.262904	-0.721533	0.804979	1	1	2378	tags=41%, list=22%, signal=53%
GO_NEGATIVE_REGULATION_OF_CELLULAR_RESPONSE_TO_GROWTH_FACTOR_STIMULUS	73	-0.188	-0.720575	0.864301	1	1	2094	tags=22%, list=19%, signal=27%
GO_PROTEIN_COMPLEX_LOCALIZATION	33	-0.205087	-0.720186	0.824351	1	1	2391	tags=27%, list=22%, signal=35%
GO_REGULATION_OF_HEART_MORPHOGENESIS	21	-0.228784	-0.720149	0.826087	1	1	2840	tags=38%, list=26%, signal=52%
GO_PURINE_CONTAINING_COMPOUND_BIOSYNTHETIC_PROCESS	72	-0.184268	-0.719435	0.847195	1	1	2013	tags=21%, list=19%, signal=25%
GO_APICAL_JUNCTION_COMPLEX	72	-0.179108	-0.719304	0.897233	1	1	2765	tags=31%, list=26%, signal=41%
GO_REGULATION_OF_PROTEIN_EXPORT_FROM_NUCLEUS	19	-0.229394	-0.718854	0.84696	1	1	3626	tags=42%, list=33%, signal=63%
GO_NAD_METABOLIC_PROCESS	31	-0.223974	-0.718645	0.80943	1	1	771	tags=13%, list=7%, signal=14%
GO_RIBONUCLEOTIDE_CATABOLIC_PROCESS	15	-0.245273	-0.718476	0.826263	1	1	612	tags=13%, list=6%, signal=14%
GO_ENDONUCLEASE_ACTIVITY	78	-0.174515	-0.718008	0.879032	1	1	2846	tags=32%, list=26%, signal=43%
GO_NEGATIVE_REGULATION_OF_DNA_METABOLIC_PROCESS	57	-0.185096	-0.717715	0.884231	1	1	1599	tags=19%, list=15%, signal=23%
GO_VESICLE_LUMEN	63	-0.224264	-0.717689	0.837398	1	1	2952	tags=40%, list=27%, signal=54%
GO_AMINOGLYCAN_METABOLIC_PROCESS	97	-0.191474	-0.717448	0.881048	1	1	1842	tags=21%, list=17%, signal=25%
GO_NUCLEOSIDE_TRIPHOSPHATE_BIOSYNTHETIC_PROCESS	32	-0.239155	-0.714635	0.773438	1	1	3316	tags=41%, list=31%, signal=58%
GO_VACUOLAR_TRANSPORT	134	-0.170629	-0.714576	0.874275	1	1	2757	tags=28%, list=25%, signal=38%
GO_NUCLEOSIDE_BISPHOSPHATE_METABOLIC_PROCESS	19	-0.240725	-0.712814	0.839147	1	1	468	tags=11%, list=4%, signal=11%
GO_VESICLE_CYTOSKELETAL_TRAFFICKING	25	-0.227118	-0.712443	0.793939	1	1	1851	tags=20%, list=17%, signal=24%
GO_ANION_TRANSMEMBRANE_TRANSPORT	127	-0.163114	-0.708884	0.960861	1	1	2911	tags=31%, list=27%, signal=43%
GO_INO80_TYPE_COMPLEX	18	-0.250038	-0.708293	0.832031	1	1	3603	tags=50%, list=33%, signal=75%
GO_ATP_DEPENDENT_DNA_HELICASE_ACTIVITY	18	-0.247453	-0.707752	0.823647	1	1	3085	tags=39%, list=28%, signal=54%
GO_REGULATION_OF_DENDRITIC_SPINE_MORPHOGENESIS	19	-0.222406	-0.705249	0.880808	1	1	2820	tags=37%, list=26%, signal=50%
GO_PORPHYRIN_CONTAINING_COMPOUND_METABOLIC_PROCESS	18	-0.266661	-0.703631	0.783333	1	1	3560	tags=50%, list=33%, signal=74%
GO_TRANSMEMBRANE_RECEPTOR_PROTEIN_KINASE_ACTIVITY	43	-0.208513	-0.703618	0.900433	1	1	2584	tags=30%, list=24%, signal=40%
GO_MOTILE_CILIUM	60	-0.188389	-0.703429	0.866799	1	1	3508	tags=45%, list=32%, signal=66%
GO_HISTONE_H3_K4_METHYLATION	17	-0.255643	-0.700144	0.802846	1	1	1501	tags=24%, list=14%, signal=27%
GO_OXIDOREDUCTION_COENZYME_METABOLIC_PROCESS	59	-0.191133	-0.698087	0.847059	1	1	771	tags=12%, list=7%, signal=13%
GO_CELLULAR_ALDEHYDE_METABOLIC_PROCESS	52	-0.190897	-0.694506	0.943888	1	1	2606	tags=33%, list=24%, signal=43%
GO_REGULATION_OF_BLOOD_VESSEL_ENDOTHELIAL_CELL_MIGRATION	24	-0.226998	-0.69358	0.821355	1	1	604	tags=13%, list=6%, signal=13%
GO_DICARBOXYLIC_ACID_METABOLIC_PROCESS	49	-0.195194	-0.693223	0.892578	1	1	1555	tags=18%, list=14%, signal=21%
GO_MEDIATOR_COMPLEX	23	-0.214715	-0.692744	0.860511	1	1	929	tags=13%, list=9%, signal=14%
GO_PLATELET_DEGRANULATION	63	-0.203141	-0.692675	0.861284	1	1	2952	tags=35%, list=27%, signal=48%
GO_RAN_GTPASE_BINDING	16	-0.23834	-0.692401	0.861789	1	1	1862	tags=25%, list=17%, signal=30%
GO_COLLAGEN_BINDING	37	-0.233666	-0.692221	0.778481	1	1	1342	tags=22%, list=12%, signal=25%
GO_CELL_SUBSTRATE_JUNCTION	223	-0.159269	-0.690959	0.902954	1	1	3035	tags=33%, list=28%, signal=45%
GO_OXYGEN_BINDING	24	-0.267845	-0.690026	0.882023	1	1	2760	tags=42%, list=25%, signal=56%
GO_BLOOD_MICROPARTICLE	68	-0.230602	-0.689702	0.83499	1	1	3254	tags=41%, list=30%, signal=58%
GO_TRANSFERASE_ACTIVITY_TRANSFERRING_ACYL_GROUPS_OTHER_THAN_AMINO_ACYL_GROUPS	117	-0.163299	-0.689105	0.944554	1	1	1522	tags=18%, list=14%, signal=21%
GO_PEPTIDYL_LYSINE_MODIFICATION	172	-0.167345	-0.688995	0.87751	1	1	1517	tags=15%, list=14%, signal=17%
GO_SWI_SNF_SUPERFAMILY_TYPE_COMPLEX	48	-0.193919	-0.687787	0.888235	1	1	816	tags=13%, list=8%, signal=13%
GO_CELLULAR_CARBOHYDRATE_BIOSYNTHETIC_PROCESS	33	-0.202666	-0.687691	0.913208	1	1	865	tags=15%, list=8%, signal=16%
GO_UNFOLDED_PROTEIN_BINDING	60	-0.192926	-0.686534	0.860465	1	1	2042	tags=25%, list=19%, signal=31%
GO_POSITIVE_REGULATION_OF_NEURON_DEATH	41	-0.178422	-0.686214	0.910506	1	1	1646	tags=17%, list=15%, signal=20%
GO_POSITIVE_REGULATION_OF_OSTEOBLAST_DIFFERENTIATION	33	-0.203418	-0.685746	0.887473	1	1	2208	tags=27%, list=20%, signal=34%
GO_PROTEIN_LIPID_COMPLEX	23	-0.232033	-0.685715	0.876247	1	1	1981	tags=30%, list=18%, signal=37%
GO_REGULATION_OF_PROTEASOMAL_PROTEIN_CATABOLIC_PROCESS	108	-0.149939	-0.68548	0.961693	1	1	2556	tags=22%, list=24%, signal=29%
GO_REGULATION_OF_ESTABLISHMENT_OF_PLANAR_POLARITY	63	-0.183107	-0.685106	0.877301	1	1	2613	tags=27%, list=24%, signal=35%
GO_VESICLE_DOCKING	29	-0.211974	-0.684565	0.850895	1	1	2676	tags=38%, list=25%, signal=50%
GO_DEVELOPMENTAL_GROWTH	198	-0.152876	-0.684265	0.965957	1	1	1746	tags=17%, list=16%, signal=20%
GO_RNA_POLYMERASE_II_TRANSCRIPTION_FACTOR_COMPLEX	54	-0.175388	-0.683498	0.943689	1	1	524	tags=9%, list=5%, signal=10%
GO_OSTEOCLAST_DIFFERENTIATION	16	-0.230361	-0.682495	0.878601	1	1	1913	tags=25%, list=18%, signal=30%
GO_NUCLEOLAR_PART	34	-0.241139	-0.680041	0.800399	1	1	3122	tags=32%, list=29%, signal=45%
GO_EXTRACELLULAR_MATRIX_DISASSEMBLY	45	-0.197696	-0.677937	0.899803	1	1	1176	tags=13%, list=11%, signal=15%
GO_PIGMENT_GRANULE	54	-0.206295	-0.67782	0.847784	1	1	1654	tags=19%, list=15%, signal=22%
GO_NUCLEAR_UBIQUITIN_LIGASE_COMPLEX	24	-0.218457	-0.67768	0.887984	1	1	794	tags=17%, list=7%, signal=18%
GO_CELLULAR_RESPONSE_TO_REACTIVE_OXYGEN_SPECIES	67	-0.164542	-0.676993	0.948819	1	1	2138	tags=21%, list=20%, signal=26%
GO_ENDORIBONUCLEASE_ACTIVITY_PRODUCING_5_PHOSPHOMONOESTERS	17	-0.245655	-0.676852	0.838772	1	1	2248	tags=35%, list=21%, signal=44%
GO_NEGATIVE_REGULATION_OF_VASCULATURE_DEVELOPMENT	37	-0.200204	-0.676486	0.925311	1	1	1767	tags=22%, list=16%, signal=26%
GO_POSITIVE_REGULATION_OF_DENDRITE_DEVELOPMENT	33	-0.185509	-0.675832	0.911824	1	1	2845	tags=33%, list=26%, signal=45%
GO_POSITIVE_REGULATION_OF_BIOMINERAL_TISSUE_DEVELOPMENT	18	-0.239723	-0.675547	0.852174	1	1	1640	tags=22%, list=15%, signal=26%
GO_HYDROLASE_ACTIVITY_HYDROLYZING_O_GLYCOSYL_COMPOUNDS	52	-0.189714	-0.675391	0.929435	1	1	1875	tags=21%, list=17%, signal=25%
GO_SULFUR_COMPOUND_BIOSYNTHETIC_PROCESS	107	-0.161537	-0.673115	0.96063	1	1	1786	tags=17%, list=16%, signal=20%
GO_INTERCALATED_DISC	29	-0.198044	-0.670542	0.935484	1	1	2297	tags=24%, list=21%, signal=31%
GO_ENDORIBONUCLEASE_ACTIVITY	32	-0.193678	-0.670399	0.88998	1	1	2393	tags=34%, list=22%, signal=44%
GO_POLYSACCHARIDE_BIOSYNTHETIC_PROCESS	29	-0.197396	-0.67035	0.913725	1	1	2286	tags=28%, list=21%, signal=35%
GO_PURINE_NUCLEOSIDE_MONOPHOSPHATE_BIOSYNTHETIC_PROCESS	36	-0.216798	-0.66913	0.83432	1	1	2013	tags=22%, list=19%, signal=27%
GO_SUBSTRATE_ADHESION_DEPENDENT_CELL_SPREADING	26	-0.207958	-0.667856	0.897233	1	1	1342	tags=19%, list=12%, signal=22%
GO_HEPARAN_SULFATE_PROTEOGLYCAN_METABOLIC_PROCESS	15	-0.242853	-0.66755	0.866667	1	1	1786	tags=27%, list=16%, signal=32%
GO_REGULATION_OF_CARBOHYDRATE_METABOLIC_PROCESS	95	-0.156005	-0.667134	0.983264	1	1	2797	tags=28%, list=26%, signal=38%
GO_POSITIVE_REGULATION_OF_OSSIFICATION	46	-0.190316	-0.667107	0.921941	1	1	2208	tags=26%, list=20%, signal=33%
GO_TUBULIN_BINDING	148	-0.147583	-0.666405	0.972399	1	1	2368	tags=23%, list=22%, signal=29%
GO_POSITIVE_REGULATION_OF_VIRAL_TRANSCRIPTION	15	-0.231287	-0.665834	0.868571	1	1	3360	tags=47%, list=31%, signal=68%
GO_CELLULAR_AMINO_ACID_BIOSYNTHETIC_PROCESS	54	-0.17466	-0.665217	0.955253	1	1	1428	tags=15%, list=13%, signal=17%
GO_ACTIN_FILAMENT_BUNDLE	27	-0.217836	-0.663427	0.844182	1	1	3147	tags=41%, list=29%, signal=57%
GO_HYDROLASE_ACTIVITY_ACTING_ON_GLYCOSYL_BONDS	67	-0.176182	-0.662445	0.940039	1	1	1973	tags=22%, list=18%, signal=27%
GO_SOMITOGENESIS	46	-0.18024	-0.661799	0.95842	1	1	354	tags=9%, list=3%, signal=9%
GO_RNA_SPLICING_VIA_TRANSESTERIFICATION_REACTIONS	147	-0.178222	-0.661542	0.854545	1	1	2762	tags=28%, list=26%, signal=37%
GO_AXO_DENDRITIC_TRANSPORT	20	-0.221238	-0.661345	0.869295	1	1	1374	tags=20%, list=13%, signal=23%
GO_POSITIVE_REGULATION_OF_BLOOD_VESSEL_ENDOTHELIAL_CELL_MIGRATION	16	-0.241895	-0.660278	0.872211	1	1	604	tags=13%, list=6%, signal=13%
GO_TRANSCRIPTION_COUPLED_NUCLEOTIDE_EXCISION_REPAIR	37	-0.193768	-0.65971	0.865079	1	1	3568	tags=41%, list=33%, signal=60%
GO_HISTONE_METHYLTRANSFERASE_COMPLEX	40	-0.196319	-0.658884	0.871541	1	1	2709	tags=28%, list=25%, signal=37%
GO_UBIQUITIN_LIKE_PROTEIN_LIGASE_ACTIVITY	112	-0.148893	-0.657865	0.97286	1	1	1266	tags=12%, list=12%, signal=13%
GO_RNA_SPLICING	196	-0.172484	-0.657301	0.866126	1	1	2997	tags=32%, list=28%, signal=43%
GO_GTPASE_BINDING	177	-0.147324	-0.656233	0.976378	1	1	2785	tags=27%, list=26%, signal=35%
GO_AMINOGLYCAN_BIOSYNTHETIC_PROCESS	61	-0.186742	-0.655542	0.910714	1	1	1842	tags=21%, list=17%, signal=26%
GO_CHAPERONE_MEDIATED_PROTEIN_FOLDING	26	-0.207315	-0.655275	0.872	1	1	965	tags=12%, list=9%, signal=13%
GO_TRNA_TRANSPORT	19	-0.234619	-0.652034	0.830677	1	1	1506	tags=16%, list=14%, signal=18%
GO_TRANSFERASE_COMPLEX	394	-0.136056	-0.651612	0.991968	1	1	3032	tags=27%, list=28%, signal=36%
GO_PIGMENT_BIOSYNTHETIC_PROCESS	29	-0.225867	-0.651086	0.857944	1	1	3635	tags=45%, list=34%, signal=67%
GO_AMMONIUM_TRANSMEMBRANE_TRANSPORT	15	-0.231481	-0.651019	0.925773	1	1	8326	tags=100%, list=77%, signal=432%
GO_CARGO_RECEPTOR_ACTIVITY	31	-0.208164	-0.649698	0.915811	1	1	1515	tags=23%, list=14%, signal=26%
GO_STEM_CELL_DIVISION	18	-0.22628	-0.647574	0.929167	1	1	2361	tags=33%, list=22%, signal=43%
GO_CARBOHYDRATE_CATABOLIC_PROCESS	72	-0.165441	-0.647437	0.961315	1	1	3625	tags=42%, list=33%, signal=62%
GO_AUTOPHAGOSOME_ORGANIZATION	26	-0.196359	-0.647381	0.920849	1	1	2883	tags=35%, list=27%, signal=47%
GO_MRNA_BINDING	90	-0.172271	-0.64623	0.89834	1	1	3035	tags=31%, list=28%, signal=43%
GO_ALPHA_AMINO_ACID_BIOSYNTHETIC_PROCESS	47	-0.177874	-0.645944	0.944551	1	1	386	tags=9%, list=4%, signal=9%
GO_CAMERA_TYPE_EYE_MORPHOGENESIS	64	-0.170747	-0.643553	0.964497	1	1	1679	tags=19%, list=16%, signal=22%
GO_SMALL_NUCLEAR_RIBONUCLEOPROTEIN_COMPLEX	33	-0.204392	-0.643274	0.872047	1	1	3396	tags=45%, list=31%, signal=66%
GO_OUTER_MEMBRANE	90	-0.15146	-0.641947	0.966797	1	1	2275	tags=20%, list=21%, signal=25%
GO_MULTICELLULAR_ORGANISM_GROWTH	44	-0.166948	-0.641799	0.94856	1	1	2227	tags=20%, list=21%, signal=26%
GO_REGULATION_OF_ALTERNATIVE_MRNA_SPLICING_VIA_SPLICEOSOME	20	-0.222859	-0.641408	0.89	1	1	3018	tags=35%, list=28%, signal=48%
GO_ENDOPLASMIC_RETICULUM_ORGANIZATION	20	-0.220806	-0.640386	0.867735	1	1	1763	tags=20%, list=16%, signal=24%
GO_GLOMERULUS_DEVELOPMENT	28	-0.209958	-0.640115	0.910387	1	1	617	tags=11%, list=6%, signal=11%
GO_DRUG_BINDING	64	-0.153179	-0.636702	0.988304	1	1	3056	tags=33%, list=28%, signal=45%
GO_CHONDROITIN_SULFATE_PROTEOGLYCAN_BIOSYNTHETIC_PROCESS	17	-0.232723	-0.636251	0.887755	1	1	1786	tags=24%, list=16%, signal=28%
GO_NEGATIVE_REGULATION_OF_PROTEIN_COMPLEX_ASSEMBLY	62	-0.155392	-0.633559	0.973384	1	1	910	tags=11%, list=8%, signal=12%
GO_ACTOMYOSIN	33	-0.194063	-0.631328	0.898204	1	1	3147	tags=39%, list=29%, signal=55%
GO_SPLICEOSOMAL_COMPLEX	95	-0.177397	-0.631134	0.867735	1	1	3396	tags=38%, list=31%, signal=55%
GO_COFACTOR_BIOSYNTHETIC_PROCESS	78	-0.174896	-0.630951	0.903636	1	1	2941	tags=27%, list=27%, signal=37%
GO_PEROXISOME_ORGANIZATION	18	-0.216549	-0.629019	0.918	1	1	1805	tags=22%, list=17%, signal=27%
GO_DNA_DEPENDENT_ATPASE_ACTIVITY	43	-0.189487	-0.626643	0.87269	1	1	3566	tags=42%, list=33%, signal=62%
GO_NUCLEAR_EXPORT	87	-0.165973	-0.62617	0.936884	1	1	2479	tags=28%, list=23%, signal=35%
GO_PURINE_NTP_DEPENDENT_HELICASE_ACTIVITY	58	-0.177278	-0.62571	0.931429	1	1	2623	tags=28%, list=24%, signal=36%
GO_MAMMARY_GLAND_MORPHOGENESIS	24	-0.197418	-0.625436	0.93617	1	1	1897	tags=17%, list=18%, signal=20%
GO_ODONTOGENESIS	69	-0.174969	-0.62496	0.983264	1	1	1853	tags=22%, list=17%, signal=26%
GO_LOCALIZATION_WITHIN_MEMBRANE	67	-0.150232	-0.624563	0.972167	1	1	2929	tags=30%, list=27%, signal=41%
GO_TRANSITION_METAL_ION_TRANSPORT	58	-0.161032	-0.624176	0.966862	1	1	1247	tags=12%, list=12%, signal=14%
GO_NUCLEOTIDE_EXCISION_REPAIR_DNA_GAP_FILLING	17	-0.236988	-0.621881	0.847222	1	1	3568	tags=41%, list=33%, signal=61%
GO_LIGASE_ACTIVITY_FORMING_CARBON_NITROGEN_BONDS	25	-0.190584	-0.621366	0.931034	1	1	2424	tags=28%, list=22%, signal=36%
GO_PROTEIN_MODIFICATION_BY_SMALL_PROTEIN_REMOVAL	62	-0.161859	-0.61527	0.951644	1	1	3329	tags=32%, list=31%, signal=46%
GO_INTRINSIC_APOPTOTIC_SIGNALING_PATHWAY_IN_RESPONSE_TO_DNA_DAMAGE_BY_P53_CLASS_MEDIATOR	15	-0.205447	-0.614973	0.92986	1	1	53	tags=7%, list=0%, signal=7%
GO_REGULATION_OF_RNA_SPLICING	57	-0.170745	-0.613187	0.936605	1	1	2814	tags=30%, list=26%, signal=40%
GO_NEURON_PROJECTION_MEMBRANE	17	-0.2118	-0.613006	0.939394	1	1	2521	tags=29%, list=23%, signal=38%
GO_CHAPERONE_BINDING	41	-0.174708	-0.611713	0.955426	1	1	2669	tags=27%, list=25%, signal=35%
GO_VENTRICULAR_SEPTUM_MORPHOGENESIS	17	-0.227313	-0.608997	0.908333	1	1	1739	tags=24%, list=16%, signal=28%
GO_TRNA_METABOLIC_PROCESS	95	-0.177296	-0.607173	0.911708	1	1	3298	tags=32%, list=30%, signal=45%
GO_DNA_DIRECTED_RNA_POLYMERASE_II_HOLOENZYME	49	-0.170289	-0.606706	0.952015	1	1	3160	tags=31%, list=29%, signal=43%
GO_BICARBONATE_TRANSPORT	24	-0.193245	-0.60476	0.955375	1	1	2957	tags=33%, list=27%, signal=46%
GO_PROTEIN_SUMOYLATION	64	-0.171209	-0.603429	0.942505	1	1	794	tags=11%, list=7%, signal=12%
GO_OLIGOSACCHARIDE_METABOLIC_PROCESS	35	-0.179208	-0.603177	0.95069	1	1	2287	tags=23%, list=21%, signal=29%
GO_IRON_ION_TRANSPORT	30	-0.182484	-0.603046	0.947059	1	1	1247	tags=13%, list=12%, signal=15%
GO_PIGMENT_METABOLIC_PROCESS	33	-0.207274	-0.602982	0.918715	1	1	3635	tags=42%, list=34%, signal=64%
GO_MATURATION_OF_SSU_RRNA_FROM_TRICISTRONIC_RRNA_TRANSCRIPT_SSU_RRNA_5_8S_RRNA_LSU_RRNA_	15	-0.247948	-0.59972	0.858491	1	1	3032	tags=47%, list=28%, signal=65%
GO_ISOPRENOID_BINDING	22	-0.205984	-0.598958	0.947162	1	1	1483	tags=18%, list=14%, signal=21%
GO_EMBRYONIC_HEART_TUBE_MORPHOGENESIS	33	-0.179472	-0.598914	0.96945	1	1	2296	tags=27%, list=21%, signal=35%
GO_BETA_CATENIN_TCF_COMPLEX_ASSEMBLY	27	-0.194928	-0.597785	0.913462	1	1	2702	tags=30%, list=25%, signal=39%
GO_MATURATION_OF_SSU_RRNA	18	-0.235596	-0.594353	0.884837	1	1	3032	tags=44%, list=28%, signal=62%
GO_DOPAMINE_RECEPTOR_SIGNALING_PATHWAY	15	-0.206072	-0.594268	0.946	1	1	3626	tags=47%, list=33%, signal=70%
GO_CELLULAR_AMINO_ACID_METABOLIC_PROCESS	191	-0.134371	-0.59327	0.994329	1	1	1555	tags=14%, list=14%, signal=16%
GO_CALCIUM_ACTIVATED_CATION_CHANNEL_ACTIVITY	16	-0.204463	-0.591757	0.949698	1	1	1399	tags=19%, list=13%, signal=22%
GO_GANGLIOSIDE_METABOLIC_PROCESS	15	-0.222389	-0.591536	0.945841	1	1	57	tags=7%, list=1%, signal=7%
GO_NUCLEOBASE_CONTAINING_COMPOUND_TRANSPORT	117	-0.143565	-0.590265	0.990215	1	1	2479	tags=25%, list=23%, signal=32%
GO_REGULATION_OF_ORGANELLE_ASSEMBLY	85	-0.144431	-0.589603	0.992048	1	1	2937	tags=26%, list=27%, signal=35%
GO_EYE_MORPHOGENESIS	82	-0.148899	-0.585752	0.990196	1	1	1679	tags=17%, list=16%, signal=20%
GO_INCLUSION_BODY	37	-0.155037	-0.584302	0.989626	1	1	2275	tags=22%, list=21%, signal=27%
GO_RESPONSE_TO_MINERALOCORTICOID	24	-0.189083	-0.582945	0.971888	1	1	3084	tags=38%, list=28%, signal=52%
GO_ENHANCER_BINDING	54	-0.158128	-0.582766	0.98768	1	1	2032	tags=19%, list=19%, signal=23%
GO_CARDIAC_SEPTUM_DEVELOPMENT	50	-0.172486	-0.581292	0.97286	1	1	1863	tags=20%, list=17%, signal=24%
GO_NUCLEAR_SPECK	116	-0.146535	-0.580249	0.97271	1	1	1074	tags=11%, list=10%, signal=12%
GO_NUCLEAR_TRANSCRIBED_MRNA_CATABOLIC_PROCESS_EXONUCLEOLYTIC	16	-0.206316	-0.573281	0.934783	1	1	3812	tags=50%, list=35%, signal=77%
GO_2_IRON_2_SULFUR_CLUSTER_BINDING	15	-0.217895	-0.572304	0.945076	1	1	3259	tags=40%, list=30%, signal=57%
GO_NUCLEOPLASM_PART	376	-0.129379	-0.572058	0.996055	1	1	2796	tags=24%, list=26%, signal=31%
GO_RNA_POLYMERASE_COMPLEX	63	-0.160141	-0.571137	0.960317	1	1	3160	tags=30%, list=29%, signal=42%
GO_DNA_TEMPLATED_TRANSCRIPTION_ELONGATION	45	-0.163328	-0.569937	0.959302	1	1	2308	tags=22%, list=21%, signal=28%
GO_RIBONUCLEOPROTEIN_COMPLEX_BINDING	52	-0.1587	-0.568329	0.958416	1	1	3490	tags=44%, list=32%, signal=65%
GO_CENTROSOME_CYCLE	28	-0.190601	-0.567019	0.927835	1	1	1013	tags=11%, list=9%, signal=12%
GO_TRNA_MODIFICATION	28	-0.199046	-0.564569	0.922929	1	1	3168	tags=32%, list=29%, signal=45%
GO_NEGATIVE_REGULATION_OF_MRNA_METABOLIC_PROCESS	22	-0.190635	-0.563173	0.943089	1	1	3543	tags=41%, list=33%, signal=61%
GO_NEGATIVE_REGULATION_OF_EPITHELIAL_CELL_APOPTOTIC_PROCESS	15	-0.215751	-0.561	0.953815	1	1	3643	tags=47%, list=34%, signal=70%
GO_NEUROMUSCULAR_PROCESS_CONTROLLING_BALANCE	33	-0.167812	-0.560415	0.984127	1	1	1512	tags=18%, list=14%, signal=21%
GO_EXTRACELLULAR_MATRIX_COMPONENT	70	-0.177655	-0.560277	0.954071	1	1	1227	tags=17%, list=11%, signal=19%
GO_REGULATION_OF_VESICLE_FUSION	40	-0.163315	-0.558972	0.982524	1	1	3101	tags=35%, list=29%, signal=49%
GO_INTRA_GOLGI_VESICLE_MEDIATED_TRANSPORT	30	-0.170776	-0.558724	0.967557	1	1	3891	tags=37%, list=36%, signal=57%
GO_PYRUVATE_METABOLIC_PROCESS	37	-0.171576	-0.554879	0.968811	1	1	3115	tags=38%, list=29%, signal=53%
GO_DNA_HELICASE_ACTIVITY	29	-0.176568	-0.552315	0.9499	1	1	3085	tags=31%, list=28%, signal=43%
GO_NEUTRAL_LIPID_BIOSYNTHETIC_PROCESS	17	-0.194027	-0.550252	0.98419	1	1	83	tags=6%, list=1%, signal=6%
GO_REGULATION_OF_CELLULAR_AMINE_METABOLIC_PROCESS	52	-0.159227	-0.549442	0.962887	1	1	2603	tags=23%, list=24%, signal=30%
GO_PROTEIN_POLYMERIZATION	34	-0.154408	-0.54709	0.991543	1	1	1170	tags=12%, list=11%, signal=13%
GO_REGULATION_OF_OXIDATIVE_STRESS_INDUCED_CELL_DEATH	24	-0.156672	-0.545972	0.977401	1	1	2939	tags=25%, list=27%, signal=34%
GO_REGULATION_OF_MRNA_METABOLIC_PROCESS	68	-0.151275	-0.542006	0.964427	1	1	3137	tags=31%, list=29%, signal=43%
GO_CELL_DIFFERENTIATION_INVOLVED_IN_KIDNEY_DEVELOPMENT	20	-0.185805	-0.541337	0.976048	1	1	2797	tags=30%, list=26%, signal=40%
GO_POST_TRANSLATIONAL_PROTEIN_MODIFICATION	24	-0.158543	-0.538872	0.981744	1	1	3033	tags=33%, list=28%, signal=46%
GO_RESPONSE_TO_TYPE_I_INTERFERON	29	-0.20475	-0.535195	0.880626	1	1	2630	tags=28%, list=24%, signal=36%
GO_CENTROSOME_DUPLICATION	19	-0.188327	-0.535096	0.944099	1	1	950	tags=11%, list=9%, signal=12%
GO_NADH_METABOLIC_PROCESS	22	-0.186803	-0.533269	0.961464	1	1	299	tags=9%, list=3%, signal=9%
GO_NEUROMUSCULAR_PROCESS	56	-0.143508	-0.529361	0.992095	1	1	2972	tags=30%, list=27%, signal=42%
GO_DNA_GEOMETRIC_CHANGE	42	-0.152622	-0.525171	0.977551	1	1	943	tags=10%, list=9%, signal=10%
GO_ONE_CARBON_METABOLIC_PROCESS	20	-0.16599	-0.518021	0.988417	1	1	938	tags=10%, list=9%, signal=11%
GO_CIS_GOLGI_NETWORK	21	-0.164523	-0.512301	0.983806	1	1	9051	tags=100%, list=84%, signal=608%
GO_RESPONSE_TO_BMP	52	-0.150478	-0.512076	0.991507	1	1	1081	tags=12%, list=10%, signal=13%
GO_SULFUR_COMPOUND_TRANSPORT	15	-0.181525	-0.511837	0.981633	1	1	1129	tags=13%, list=10%, signal=15%
GO_NUCLEAR_HETEROCHROMATIN	24	-0.161977	-0.511099	0.967532	1	1	9079	tags=100%, list=84%, signal=618%
GO_ENDOPLASMIC_RETICULUM_GOLGI_INTERMEDIATE_COMPARTMENT_MEMBRANE	34	-0.154118	-0.509205	0.988909	1	1	1452	tags=15%, list=13%, signal=17%
GO_MEMBRANE_LIPID_CATABOLIC_PROCESS	16	-0.184447	-0.506557	0.980159	1	1	2122	tags=25%, list=20%, signal=31%
GO_TELOMERE_CAPPING	16	-0.193022	-0.505413	0.963636	1	1	3797	tags=50%, list=35%, signal=77%
GO_RNA_MODIFICATION	58	-0.145775	-0.505131	0.981308	1	1	9259	tags=100%, list=86%, signal=686%
GO_POSITIVE_REGULATION_OF_DNA_REPAIR	22	-0.154979	-0.495787	0.994	1	1	1361	tags=14%, list=13%, signal=16%
GO_SMALL_SUBUNIT_PROCESSOME	16	-0.200577	-0.491862	0.958251	1	1	3246	tags=44%, list=30%, signal=62%
GO_DNA_TEMPLATED_TRANSCRIPTION_TERMINATION	54	-0.148718	-0.491276	0.986248	1	1	2067	tags=20%, list=19%, signal=25%
GO_PROTEIN_K48_LINKED_UBIQUITINATION	29	-0.140496	-0.48906	0.996154	1	1	3007	tags=31%, list=28%, signal=43%
GO_ACETYLTRANSFERASE_COMPLEX	56	-0.134712	-0.488851	0.99596	1	1	574	tags=7%, list=5%, signal=8%
GO_HISTONE_UBIQUITINATION	21	-0.170475	-0.485942	0.956879	0.999686	1	2999	tags=33%, list=28%, signal=46%
GO_CELL_AGING	39	-0.132353	-0.484667	0.997934	0.998918	1	3583	tags=38%, list=33%, signal=57%
GO_PRERIBOSOME	31	-0.172014	-0.480656	0.957407	0.998566	1	3246	tags=35%, list=30%, signal=51%
GO_OXIDOREDUCTASE_ACTIVITY_ACTING_ON_PAIRED_DONORS_WITH_INCORPORATION_OR_REDUCTION_OF_MOLECULAR_OXYGEN_2_OXOGLUTARATE_AS_ONE_DONOR_AND_INCORPORATION_OF_ONE_ATOM_EACH_OF_OXYGEN_INTO_BOTH_DONORS	21	-0.152864	-0.477426	0.992395	0.998078	1	9177	tags=100%, list=85%, signal=655%
GO_REGULATION_OF_MRNA_3_END_PROCESSING	18	-0.172514	-0.472926	0.986193	0.99775	1	3600	tags=44%, list=33%, signal=66%
GO_ER_TO_GOLGI_VESICLE_MEDIATED_TRANSPORT	93	-0.119972	-0.471526	1	0.997001	1	3145	tags=28%, list=29%, signal=39%
GO_NEGATIVE_REGULATION_OF_TELOMERE_MAINTENANCE	15	-0.170443	-0.462426	0.988235	0.997113	1	8986	tags=100%, list=83%, signal=587%
GO_REGULATION_OF_CELLULAR_RESPONSE_TO_HEAT	44	-0.128086	-0.455065	0.992079	0.996969	1	8166	tags=95%, list=75%, signal=387%
GO_REGULATION_OF_SUBSTRATE_ADHESION_DEPENDENT_CELL_SPREADING	20	-0.148837	-0.433751	0.996071	0.99778	1	910	tags=10%, list=8%, signal=11%
GO_PLATELET_AGGREGATION	21	-0.149896	-0.424605	0.998062	0.997393	1	3234	tags=33%, list=30%, signal=47%

## Sheet: High expression of STAT3
Table SI. GSEA Gene Ontology results. GSEA outcomes of the c2 (c2.all.v6.1.symbols.gmt) reference gene set for the key genes in the Janus kinase-signal transducer and activator of transcription signaling pathway in skin cutaneous melanoma. GSEA, gene set enrichment analysis. GSEA, gene set enrich analysis; GO, gene ontology; ES, enrichment score; NES, normalized enrichment score; NOM, nominal; FD…
Name	Size	ES	NES	NOM P-value	FDR q-value	FWER p-value	Rank to max	Leading Edge
GO_GLUCAN_BIOSYNTHETIC_PROCESS	16	0.638471	1.96813	0.00194553	1	0.468	1704	tags=56%, list=16%, signal=67%
GO_CELLULAR_CARBOHYDRATE_BIOSYNTHETIC_PROCESS	33	0.513912	1.75273	0.00386847	1	0.958	1704	tags=42%, list=16%, signal=50%
GO_REGULATION_OF_GLUCONEOGENESIS	24	0.475248	1.59255	0.0118577	1	0.999	1029	tags=33%, list=10%, signal=37%
GO_TETRAPYRROLE_METABOLIC_PROCESS	27	0.54206	1.70138	0.0125786	1	0.986	2297	tags=44%, list=21%, signal=56%
GO_POSITIVE_REGULATION_OF_PROTEIN_ACETYLATION	24	0.485632	1.64675	0.0164609	1	0.995	3285	tags=58%, list=30%, signal=84%
GO_RECEPTOR_REGULATOR_ACTIVITY	24	0.466362	1.54528	0.0209524	1	0.999	725	tags=25%, list=7%, signal=27%
GO_SYNAPTONEMAL_COMPLEX	18	0.550323	1.67591	0.022449	1	0.992	2346	tags=56%, list=22%, signal=71%
GO_RRNA_MODIFICATION	15	0.604657	1.69186	0.0233051	1	0.991	3498	tags=73%, list=32%, signal=108%
GO_REGULATION_OF_CARBOHYDRATE_BIOSYNTHETIC_PROCESS	54	0.379399	1.48611	0.0233463	1	0.999	1092	tags=26%, list=10%, signal=29%
GO_ENERGY_RESERVE_METABOLIC_PROCESS	48	0.36708	1.4846	0.0237154	1	0.999	2384	tags=35%, list=22%, signal=45%
GO_INTRINSIC_COMPONENT_OF_MITOCHONDRIAL_MEMBRANE	30	0.510788	1.6508	0.0246914	1	0.995	2099	tags=40%, list=19%, signal=49%
GO_METHIONINE_METABOLIC_PROCESS	15	0.581026	1.72855	0.0271399	1	0.976	2866	tags=53%, list=26%, signal=72%
GO_GLUCAN_METABOLIC_PROCESS	41	0.381724	1.50148	0.0276134	1	0.999	2384	tags=39%, list=22%, signal=50%
GO_REGULATION_OF_PROTEIN_OLIGOMERIZATION	17	0.505261	1.52573	0.0294737	1	0.999	2977	tags=47%, list=27%, signal=65%
GO_REGULATION_OF_RNA_SPLICING	57	0.463017	1.66206	0.0320513	1	0.992	3643	tags=61%, list=34%, signal=92%
GO_CALCIUM_DEPENDENT_PHOSPHOLIPID_BINDING	27	0.447502	1.53849	0.0326923	1	0.999	1256	tags=33%, list=12%, signal=38%
GO_POSITIVE_REGULATION_OF_CARBOHYDRATE_METABOLIC_PROCESS	41	0.407335	1.46035	0.0330739	1	0.999	1092	tags=29%, list=10%, signal=32%
GO_CELLULAR_RESPONSE_TO_ESTROGEN_STIMULUS	25	0.455568	1.50877	0.0332031	1	0.999	1363	tags=28%, list=13%, signal=32%
GO_POSITIVE_REGULATION_OF_WOUND_HEALING	26	0.49752	1.51442	0.0366795	1	0.999	1414	tags=38%, list=13%, signal=44%
GO_REGULATION_OF_MRNA_SPLICING_VIA_SPLICEOSOME	35	0.534601	1.66898	0.0369565	1	0.992	3643	tags=63%, list=34%, signal=94%
GO_BASAL_PLASMA_MEMBRANE	19	0.543637	1.55565	0.040153	1	0.999	2777	tags=63%, list=26%, signal=85%
GO_TRANSCRIPTION_FROM_RNA_POLYMERASE_I_PROMOTER	18	0.545294	1.59278	0.040404	1	0.999	3033	tags=56%, list=28%, signal=77%
GO_GLUTAMINE_FAMILY_AMINO_ACID_METABOLIC_PROCESS	33	0.441992	1.49708	0.0409836	1	0.999	3447	tags=52%, list=32%, signal=75%
GO_ANTIMICROBIAL_HUMORAL_RESPONSE	24	0.534303	1.49286	0.0462428	1	0.999	1851	tags=54%, list=17%, signal=65%
GO_REGULATION_OF_KERATINOCYTE_PROLIFERATION	17	0.565359	1.57862	0.0464217	1	0.999	2620	tags=59%, list=24%, signal=77%
GO_EUCHROMATIN	16	0.531983	1.55223	0.0466531	1	0.999	1299	tags=38%, list=12%, signal=43%
GO_HEXOSE_CATABOLIC_PROCESS	28	0.524172	1.58642	0.046875	1	0.999	2254	tags=50%, list=21%, signal=63%
GO_SENSORY_PERCEPTION_OF_MECHANICAL_STIMULUS	80	0.32547	1.37781	0.0476191	1	1	1964	tags=33%, list=18%, signal=39%
GO_NAD_METABOLIC_PROCESS	31	0.482649	1.53866	0.0480962	1	0.999	2559	tags=45%, list=24%, signal=59%
GO_SMALL_SUBUNIT_PROCESSOME	16	0.61883	1.58585	0.049896	1	0.999	1509	tags=50%, list=14%, signal=58%
GO_WATER_HOMEOSTASIS	39	0.55146	1.61079	0.0505837	1	0.999	1467	tags=41%, list=14%, signal=47%
GO_LIPID_TRANSPORTER_ACTIVITY	60	0.381416	1.42154	0.0511364	1	1	2109	tags=32%, list=19%, signal=39%
GO_BASAL_PART_OF_CELL	29	0.447696	1.45555	0.0542636	1	1	2790	tags=52%, list=26%, signal=69%
GO_MATURATION_OF_SSU_RRNA_FROM_TRICISTRONIC_RRNA_TRANSCRIPT_SSU_RRNA_5_8S_RRNA_LSU_RRNA_	15	0.639354	1.60479	0.0542798	1	0.999	2751	tags=67%, list=25%, signal=89%
GO_SIGNAL_TRANSDUCTION_IN_ABSENCE_OF_LIGAND	21	0.451091	1.461	0.0546218	1	0.999	4087	tags=67%, list=38%, signal=107%
GO_CELLULAR_RESPONSE_TO_ESTRADIOL_STIMULUS	20	0.444959	1.40053	0.0560928	1	1	1363	tags=30%, list=13%, signal=34%
GO_MATURATION_OF_SSU_RRNA	18	0.596711	1.58476	0.0561331	1	0.999	2751	tags=56%, list=25%, signal=74%
GO_POSITIVE_REGULATION_OF_RELEASE_OF_CYTOCHROME_C_FROM_MITOCHONDRIA	18	0.552846	1.56049	0.0607966	1	0.999	2670	tags=61%, list=25%, signal=81%
GO_ASPARTATE_FAMILY_AMINO_ACID_METABOLIC_PROCESS	33	0.406721	1.45764	0.0607966	1	1	3129	tags=42%, list=29%, signal=59%
GO_RIBOSOMAL_SMALL_SUBUNIT_BIOGENESIS	28	0.575299	1.60335	0.0622407	1	0.999	2751	tags=54%, list=25%, signal=72%
GO_PHOSPHATIDYLGLYCEROL_METABOLIC_PROCESS	22	0.475779	1.45044	0.062753	1	1	1617	tags=23%, list=15%, signal=27%
GO_RHO_PROTEIN_SIGNAL_TRANSDUCTION	27	0.468226	1.50974	0.0630798	1	0.999	818	tags=30%, list=8%, signal=32%
GO_MULTICELLULAR_ORGANISMAL_WATER_HOMEOSTASIS	35	0.554688	1.59424	0.0634615	1	0.999	1467	tags=43%, list=14%, signal=49%
GO_TETRAPYRROLE_BIOSYNTHETIC_PROCESS	16	0.56128	1.52523	0.0676533	1	0.999	2060	tags=44%, list=19%, signal=54%
GO_SPECIFICATION_OF_SYMMETRY	69	0.400896	1.48338	0.0693277	1	0.999	1136	tags=23%, list=10%, signal=26%
GO_POSITIVE_REGULATION_OF_CHROMATIN_MODIFICATION	56	0.379497	1.4319	0.0709812	1	1	3521	tags=50%, list=33%, signal=74%
GO_HEME_METABOLIC_PROCESS	16	0.5673	1.52276	0.072	1	0.999	2060	tags=44%, list=19%, signal=54%
GO_CARBOHYDRATE_BIOSYNTHETIC_PROCESS	80	0.380498	1.43472	0.0721443	1	1	2385	tags=39%, list=22%, signal=49%
GO_NEURAL_CREST_CELL_MIGRATION	31	0.429431	1.43207	0.072407	1	1	1730	tags=35%, list=16%, signal=42%
GO_CAJAL_BODY	26	0.478149	1.50769	0.0726496	1	0.999	2940	tags=50%, list=27%, signal=68%
GO_POLYSACCHARIDE_BIOSYNTHETIC_PROCESS	29	0.416917	1.43278	0.0726915	1	1	1704	tags=38%, list=16%, signal=45%
GO_CLATHRIN_BINDING	33	0.380686	1.40674	0.0735849	1	1	1391	tags=30%, list=13%, signal=35%
GO_EXCRETION	21	0.501667	1.47555	0.0742188	1	0.999	2080	tags=48%, list=19%, signal=59%
GO_NUCLEAR_BODY	190	0.332934	1.43049	0.0761099	1	1	2679	tags=35%, list=25%, signal=45%
GO_DYNEIN_COMPLEX	22	0.458002	1.45536	0.0763209	1	1	3231	tags=55%, list=30%, signal=78%
GO_ENDONUCLEASE_ACTIVITY	78	0.337447	1.39955	0.0772532	1	1	2284	tags=29%, list=21%, signal=37%
GO_LIPID_PHOSPHORYLATION	54	0.335763	1.32586	0.0779727	1	1	2807	tags=39%, list=26%, signal=52%
GO_GLUCOSE_CATABOLIC_PROCESS	18	0.565752	1.52255	0.0792079	1	0.999	2254	tags=56%, list=21%, signal=70%
GO_CALCIUM_ION_REGULATED_EXOCYTOSIS_OF_NEUROTRANSMITTER	16	0.473273	1.40823	0.0792079	1	1	1256	tags=38%, list=12%, signal=42%
GO_REGULATION_OF_OXIDOREDUCTASE_ACTIVITY	51	0.363591	1.36681	0.0792079	1	1	1870	tags=29%, list=17%, signal=35%
GO_PROTEIN_TRANSMEMBRANE_TRANSPORT	32	0.45861	1.54064	0.0807453	1	0.999	3773	tags=56%, list=35%, signal=86%
GO_MITOCHONDRIAL_TRANSMEMBRANE_TRANSPORT	32	0.542967	1.54445	0.0819328	1	0.999	3773	tags=69%, list=35%, signal=105%
GO_REGULATION_OF_VOLTAGE_GATED_CALCIUM_CHANNEL_ACTIVITY	18	0.462486	1.43957	0.0819672	1	1	3075	tags=56%, list=28%, signal=77%
GO_METHYLATION	134	0.308693	1.37016	0.0824742	1	1	3067	tags=40%, list=28%, signal=54%
GO_NUCLEAR_PERIPHERY	65	0.371128	1.42824	0.0835073	1	1	3521	tags=48%, list=33%, signal=70%
GO_NEGATIVE_REGULATION_OF_PROTEIN_CATABOLIC_PROCESS	64	0.314006	1.35005	0.0835118	1	1	3831	tags=45%, list=35%, signal=70%
GO_OXIDOREDUCTION_COENZYME_METABOLIC_PROCESS	59	0.405564	1.4749	0.0868644	1	0.999	2633	tags=44%, list=24%, signal=58%
GO_KERATINIZATION	30	0.763363	1.52495	0.0875486	1	0.999	1237	tags=73%, list=11%, signal=83%
GO_RNA_METHYLATION	22	0.477748	1.48256	0.0878661	1	0.999	2703	tags=50%, list=25%, signal=66%
GO_MONOSACCHARIDE_CATABOLIC_PROCESS	35	0.46081	1.45548	0.0881764	1	1	2585	tags=49%, list=24%, signal=64%
GO_NUCLEAR_MATRIX	54	0.380674	1.42814	0.0887949	1	1	3521	tags=44%, list=33%, signal=66%
GO_EPIDERMAL_CELL_DIFFERENTIATION	81	0.563117	1.58448	0.0905588	1	0.999	1087	tags=43%, list=10%, signal=48%
GO_PROSTATE_GLAND_DEVELOPMENT	22	0.449121	1.39756	0.0907258	1	1	3692	tags=59%, list=34%, signal=89%
GO_RRNA_METABOLIC_PROCESS	148	0.468818	1.5374	0.0920502	1	0.999	2971	tags=48%, list=27%, signal=65%
GO_MYOSIN_BINDING	29	0.408936	1.37172	0.0921569	1	1	2918	tags=41%, list=27%, signal=56%
GO_CYCLIN_DEPENDENT_PROTEIN_SERINE_THREONINE_KINASE_REGULATOR_ACTIVITY	16	0.498126	1.43958	0.0929752	1	1	1367	tags=25%, list=13%, signal=29%
GO_REGULATION_OF_MEMBRANE_LIPID_DISTRIBUTION	18	0.424363	1.36897	0.0933063	1	1	1955	tags=33%, list=18%, signal=41%
GO_NCRNA_PROCESSING	217	0.423938	1.52088	0.0950413	1	0.999	2987	tags=44%, list=28%, signal=60%
GO_RNA_MODIFICATION	58	0.401424	1.48005	0.0958084	1	0.999	2703	tags=40%, list=25%, signal=53%
GO_POLYSACCHARIDE_METABOLIC_PROCESS	57	0.325404	1.32341	0.0961924	1	1	2385	tags=35%, list=22%, signal=45%
GO_POSITIVE_REGULATION_OF_RESPONSE_TO_EXTRACELLULAR_STIMULUS	28	0.394769	1.37476	0.0963391	1	1	2044	tags=32%, list=19%, signal=40%
GO_MULTICELLULAR_ORGANISMAL_HOMEOSTASIS	161	0.314488	1.32346	0.0966543	1	1	1898	tags=27%, list=18%, signal=33%
GO_RNA_SECONDARY_STRUCTURE_UNWINDING	25	0.471984	1.45204	0.0967078	1	1	3774	tags=60%, list=35%, signal=92%
GO_NADH_METABOLIC_PROCESS	22	0.531361	1.4786	0.098	1	0.999	2559	tags=50%, list=24%, signal=65%
GO_NEGATIVE_REGULATION_OF_STEM_CELL_DIFFERENTIATION	27	0.420669	1.39672	0.0985325	1	1	918	tags=26%, list=8%, signal=28%
GO_SENSORY_PERCEPTION	285	0.257289	1.21724	0.0991561	1	1	2091	tags=27%, list=19%, signal=33%
GO_PORPHYRIN_CONTAINING_COMPOUND_METABOLIC_PROCESS	18	0.530821	1.47177	0.1	1	0.999	2060	tags=39%, list=19%, signal=48%
GO_BETA_CATENIN_DESTRUCTION_COMPLEX_DISASSEMBLY	15	0.484339	1.39887	0.100394	1	1	239	tags=20%, list=2%, signal=20%
GO_NEGATIVE_REGULATION_OF_TOR_SIGNALING	15	0.451583	1.35415	0.101504	1	1	3455	tags=47%, list=32%, signal=68%
GO_MAGNESIUM_ION_BINDING	112	0.282804	1.27313	0.102079	1	1	2271	tags=29%, list=21%, signal=36%
GO_DIOXYGENASE_ACTIVITY	41	0.349137	1.34266	0.102515	1	1	1710	tags=22%, list=16%, signal=26%
GO_RNA_PROCESSING	456	0.359527	1.46313	0.103734	1	0.999	3506	tags=46%, list=32%, signal=65%
GO_REGULATION_OF_HISTONE_H3_K4_METHYLATION	17	0.492026	1.41508	0.103814	1	1	1044	tags=29%, list=10%, signal=32%
GO_RIBOSOME_BINDING	25	0.414031	1.3743	0.103922	1	1	2023	tags=48%, list=19%, signal=59%
GO_THYROID_HORMONE_RECEPTOR_BINDING	17	0.489389	1.42327	0.105263	1	1	4505	tags=71%, list=42%, signal=121%
GO_DEFENSE_RESPONSE_TO_BACTERIUM	104	0.368742	1.3169	0.106667	1	1	1183	tags=28%, list=11%, signal=31%
GO_KERATINOCYTE_DIFFERENTIATION	61	0.621055	1.53478	0.106931	1	0.999	1237	tags=52%, list=11%, signal=59%
GO_CORNIFIED_ENVELOPE	25	0.784565	1.47887	0.107422	1	0.999	1237	tags=80%, list=11%, signal=90%
GO_HISTONE_H3_ACETYLATION	29	0.426705	1.41289	0.107438	1	1	2257	tags=38%, list=21%, signal=48%
GO_REGULATION_OF_PROTEIN_PHOSPHATASE_TYPE_2A_ACTIVITY	17	0.45671	1.38356	0.108434	1	1	3790	tags=59%, list=35%, signal=90%
GO_RECEPTOR_ACTIVATOR_ACTIVITY	16	0.442146	1.34932	0.108949	1	1	404	tags=19%, list=4%, signal=19%
GO_G_PROTEIN_ALPHA_SUBUNIT_BINDING	16	0.455892	1.34699	0.109615	1	1	1831	tags=31%, list=17%, signal=38%
GO_MACROMOLECULAR_COMPLEX_REMODELING	15	0.492547	1.37069	0.10987	1	1	609	tags=27%, list=6%, signal=28%
GO_EPIDERMIS_DEVELOPMENT	142	0.496521	1.5005	0.110236	1	0.999	1440	tags=41%, list=13%, signal=46%
GO_TRANSCRIPTION_FROM_RNA_POLYMERASE_III_PROMOTER	18	0.480237	1.41112	0.112016	1	1	4404	tags=61%, list=41%, signal=103%
GO_PROTEIN_LOCALIZATION_TO_MITOCHONDRION	45	0.484697	1.48325	0.112051	1	0.999	3842	tags=60%, list=35%, signal=93%
GO_MRNA_3_END_PROCESSING	49	0.396037	1.38752	0.113006	1	1	3725	tags=51%, list=34%, signal=77%
GO_MACROMOLECULE_DEACYLATION	43	0.339634	1.30556	0.114458	1	1	3858	tags=58%, list=36%, signal=90%
GO_REGULATION_OF_DNA_TEMPLATED_TRANSCRIPTION_ELONGATION	25	0.410395	1.3677	0.114583	1	1	3358	tags=48%, list=31%, signal=69%
GO_DNA_TEMPLATED_TRANSCRIPTION_TERMINATION	54	0.400654	1.39668	0.115304	1	1	3033	tags=46%, list=28%, signal=64%
GO_SOLUTE_SODIUM_SYMPORTER_ACTIVITY	25	0.415448	1.32679	0.116541	1	1	2727	tags=44%, list=25%, signal=59%
GO_PROTEIN_TARGETING_TO_MITOCHONDRION	34	0.530918	1.50046	0.11691	1	0.999	3836	tags=68%, list=35%, signal=104%
GO_REGULATION_OF_ACTION_POTENTIAL	25	0.404658	1.31632	0.117647	1	1	2476	tags=36%, list=23%, signal=47%
GO_CARDIAC_CONDUCTION	49	0.370676	1.35811	0.120724	1	1	1965	tags=31%, list=18%, signal=37%
GO_SERINE_TYPE_ENDOPEPTIDASE_INHIBITOR_ACTIVITY	58	0.430786	1.36009	0.121756	1	1	1320	tags=34%, list=12%, signal=39%
GO_LABYRINTHINE_LAYER_DEVELOPMENT	23	0.465968	1.38129	0.12253	1	1	1004	tags=35%, list=9%, signal=38%
GO_RNA_3_END_PROCESSING	62	0.382179	1.36692	0.122581	1	1	1637	tags=29%, list=15%, signal=34%
GO_POSITIVE_REGULATION_OF_MITOCHONDRION_ORGANIZATION	93	0.314002	1.29805	0.122951	1	1	2726	tags=32%, list=25%, signal=43%
GO_NEGATIVE_REGULATION_OF_RNA_SPLICING	16	0.506891	1.40362	0.124183	1	1	2110	tags=50%, list=19%, signal=62%
GO_REGULATION_OF_ALTERNATIVE_MRNA_SPLICING_VIA_SPLICEOSOME	20	0.483269	1.37956	0.125532	1	1	3643	tags=60%, list=34%, signal=90%
GO_REGULATION_OF_RENAL_SYSTEM_PROCESS	19	0.491074	1.36232	0.125737	1	1	2025	tags=47%, list=19%, signal=58%
GO_SKIN_DEVELOPMENT	122	0.48555	1.46122	0.126233	1	0.999	1098	tags=36%, list=10%, signal=40%
GO_STRUCTURAL_MOLECULE_ACTIVITY	415	0.317518	1.29104	0.126531	1	1	2363	tags=34%, list=22%, signal=42%
GO_REGULATION_OF_CARBOHYDRATE_METABOLIC_PROCESS	95	0.286451	1.24123	0.127341	1	1	1224	tags=21%, list=11%, signal=24%
GO_NEGATIVE_REGULATION_OF_JNK_CASCADE	23	0.386912	1.29574	0.12749	1	1	3101	tags=48%, list=29%, signal=67%
GO_GLUTAMINE_FAMILY_AMINO_ACID_CATABOLIC_PROCESS	15	0.493734	1.38479	0.127572	1	1	3447	tags=60%, list=32%, signal=88%
GO_RIBONUCLEOPROTEIN_COMPLEX_LOCALIZATION	69	0.370228	1.3518	0.128631	1	1	2590	tags=38%, list=24%, signal=49%
GO_POLYUBIQUITIN_BINDING	22	0.407654	1.34	0.129555	1	1	3638	tags=50%, list=34%, signal=75%
GO_INTRINSIC_COMPONENT_OF_MITOCHONDRIAL_OUTER_MEMBRANE	17	0.457995	1.36019	0.129741	1	1	1888	tags=35%, list=17%, signal=43%
GO_MITOCHONDRIAL_MEMBRANE_ORGANIZATION	53	0.374364	1.33689	0.129897	1	1	3879	tags=55%, list=36%, signal=85%
GO_CELLULAR_RESPONSE_TO_UV	36	0.359945	1.31641	0.130097	1	1	4315	tags=56%, list=40%, signal=92%
GO_NUCLEAR_MEMBRANE	135	0.279898	1.25751	0.131313	1	1	3821	tags=45%, list=35%, signal=69%
GO_PHOSPHATIDYLINOSITOL_METABOLIC_PROCESS	105	0.278173	1.22538	0.132184	1	1	2044	tags=25%, list=19%, signal=30%
GO_PHOSPHATIDYLETHANOLAMINE_ACYL_CHAIN_REMODELING	17	0.481917	1.36481	0.132948	1	1	1522	tags=29%, list=14%, signal=34%
GO_INNER_EAR_MORPHOGENESIS	53	0.35463	1.27461	0.133192	1	1	1766	tags=32%, list=16%, signal=38%
GO_MITOCHONDRIAL_TRANSPORT	97	0.371005	1.37156	0.134021	1	1	3879	tags=55%, list=36%, signal=84%
GO_ASPARTATE_FAMILY_AMINO_ACID_BIOSYNTHETIC_PROCESS	17	0.44778	1.32226	0.134454	1	1	3129	tags=53%, list=29%, signal=74%
GO_INOSITOL_LIPID_MEDIATED_SIGNALING	68	0.307592	1.22881	0.135084	1	1	2629	tags=38%, list=24%, signal=50%
GO_LONG_CHAIN_FATTY_ACID_METABOLIC_PROCESS	49	0.396558	1.34113	0.135397	1	1	1641	tags=35%, list=15%, signal=41%
GO_REGULATION_OF_CELLULAR_RESPIRATION	15	0.449839	1.33326	0.136905	1	1	964	tags=27%, list=9%, signal=29%
GO_NCRNA_METABOLIC_PROCESS	292	0.359447	1.38158	0.136929	1	1	2987	tags=40%, list=28%, signal=54%
GO_RIBOSOME_BIOGENESIS	177	0.439103	1.43773	0.137131	1	1	2902	tags=42%, list=27%, signal=57%
GO_POSITIVE_REGULATION_OF_ORGANELLE_ORGANIZATION	310	0.244085	1.21249	0.140281	1	1	3183	tags=34%, list=29%, signal=46%
GO_RNA_POLYADENYLATION	23	0.438445	1.37329	0.140787	1	1	3260	tags=52%, list=30%, signal=74%
GO_EPITHELIAL_CELL_DIFFERENTIATION	285	0.327661	1.31661	0.1409	1	1	1457	tags=26%, list=13%, signal=29%
GO_DEOXYRIBONUCLEASE_ACTIVITY	40	0.380057	1.33779	0.141026	1	1	3937	tags=55%, list=36%, signal=86%
GO_TRNA_PROCESSING	60	0.397903	1.36252	0.141962	1	1	2964	tags=42%, list=27%, signal=57%
GO_PHOSPHATIDYLCHOLINE_ACYL_CHAIN_REMODELING	17	0.479682	1.35223	0.142292	1	1	1522	tags=29%, list=14%, signal=34%
GO_GENERATION_OF_PRECURSOR_METABOLITES_AND_ENERGY	178	0.360783	1.36909	0.14375	1	1	2630	tags=38%, list=24%, signal=50%
GO_ATP_GENERATION_FROM_ADP	23	0.453554	1.37682	0.144269	1	1	2585	tags=48%, list=24%, signal=63%
GO_PHOSPHOLIPID_TRANSPORTER_ACTIVITY	26	0.375745	1.2804	0.144814	1	1	1955	tags=27%, list=18%, signal=33%
GO_PYRUVATE_METABOLIC_PROCESS	37	0.413437	1.36715	0.144989	1	1	1874	tags=32%, list=17%, signal=39%
GO_ENDODEOXYRIBONUCLEASE_ACTIVITY	31	0.394138	1.32938	0.145022	1	1	3937	tags=58%, list=36%, signal=91%
GO_ATP_DEPENDENT_DNA_HELICASE_ACTIVITY	18	0.483597	1.3696	0.146045	1	1	4268	tags=67%, list=39%, signal=110%
GO_NEGATIVE_REGULATION_OF_CATABOLIC_PROCESS	116	0.257269	1.19934	0.148148	1	1	3128	tags=35%, list=29%, signal=49%
GO_SAGA_TYPE_COMPLEX	22	0.434858	1.357	0.150101	1	1	3285	tags=45%, list=30%, signal=65%
GO_COENZYME_BIOSYNTHETIC_PROCESS	54	0.374686	1.3235	0.150515	1	1	2655	tags=35%, list=25%, signal=46%
GO_POSITIVE_REGULATION_OF_VASODILATION	20	0.420706	1.29096	0.150905	1	1	1532	tags=35%, list=14%, signal=41%
GO_PURINE_NTP_DEPENDENT_HELICASE_ACTIVITY	58	0.377667	1.33164	0.15625	1	1	3573	tags=47%, list=33%, signal=69%
GO_CELL_FATE_COMMITMENT_INVOLVED_IN_FORMATION_OF_PRIMARY_GERM_LAYER	21	0.436757	1.32385	0.156556	1	1	2015	tags=33%, list=19%, signal=41%
GO_ARACHIDONIC_ACID_METABOLIC_PROCESS	27	0.439368	1.2899	0.156788	1	1	1584	tags=37%, list=15%, signal=43%
GO_BASE_EXCISION_REPAIR	28	0.415902	1.3484	0.157783	1	1	2890	tags=36%, list=27%, signal=49%
GO_NUCLEASE_ACTIVITY	121	0.277835	1.22424	0.157783	1	1	3222	tags=34%, list=30%, signal=48%
GO_DNA_MODIFICATION	51	0.340701	1.26669	0.157895	1	1	2048	tags=33%, list=19%, signal=41%
GO_INTERCELLULAR_BRIDGE	22	0.377397	1.27068	0.16	1	1	406	tags=18%, list=4%, signal=19%
GO_POLYSACCHARIDE_CATABOLIC_PROCESS	17	0.421079	1.26911	0.161224	1	1	2384	tags=47%, list=22%, signal=60%
GO_REGULATION_OF_GLYCOGEN_METABOLIC_PROCESS	19	0.415483	1.28338	0.161677	1	1	2148	tags=32%, list=20%, signal=39%
GO_ACETYLCHOLINE_RECEPTOR_ACTIVITY	20	0.426535	1.291	0.162272	1	1	1382	tags=40%, list=13%, signal=46%
GO_PATTERNING_OF_BLOOD_VESSELS	19	0.441796	1.28561	0.163673	1	1	1730	tags=32%, list=16%, signal=38%
GO_PALMITOYLTRANSFERASE_ACTIVITY	19	0.424077	1.31186	0.163968	1	1	4019	tags=63%, list=37%, signal=100%
GO_FATTY_ACID_DERIVATIVE_METABOLIC_PROCESS	49	0.420609	1.28696	0.164384	1	1	1599	tags=35%, list=15%, signal=41%
GO_MRNA_PROCESSING	232	0.315621	1.30075	0.164583	1	1	3685	tags=47%, list=34%, signal=69%
GO_VASOCONSTRICTION	16	0.464014	1.28658	0.165703	1	1	3979	tags=81%, list=37%, signal=128%
GO_BASOLATERAL_PLASMA_MEMBRANE	110	0.297251	1.23513	0.165736	1	1	2955	tags=43%, list=27%, signal=58%
GO_NEURAL_TUBE_PATTERNING	24	0.417927	1.28458	0.166667	1	1	1915	tags=29%, list=18%, signal=35%
GO_NEGATIVE_REGULATION_OF_EPITHELIAL_TO_MESENCHYMAL_TRANSITION	16	0.425966	1.26672	0.166667	1	1	592	tags=25%, list=5%, signal=26%
GO_BRUSH_BORDER_MEMBRANE	40	0.361257	1.25414	0.166979	1	1	2567	tags=35%, list=24%, signal=46%
GO_GOLGI_LUMEN	49	0.389661	1.26691	0.169557	1	1	1415	tags=31%, list=13%, signal=35%
GO_N_ACETYLTRANSFERASE_ACTIVITY	48	0.340158	1.27363	0.170254	1	1	3923	tags=54%, list=36%, signal=85%
GO_AMMONIUM_ION_BINDING	33	0.367784	1.24035	0.170874	1	1	1627	tags=33%, list=15%, signal=39%
GO_AROMATIC_AMINO_ACID_FAMILY_METABOLIC_PROCESS	16	0.456719	1.29641	0.17119	1	1	3846	tags=63%, list=36%, signal=97%
GO_SODIUM_CHANNEL_ACTIVITY	15	0.464502	1.28981	0.172084	1	1	547	tags=20%, list=5%, signal=21%
GO_MACROMOLECULE_METHYLATION	100	0.305599	1.26105	0.172269	1	1	3067	tags=40%, list=28%, signal=55%
GO_MULTI_ORGANISM_METABOLIC_PROCESS	87	0.482574	1.40886	0.173554	1	1	4327	tags=69%, list=40%, signal=114%
GO_NEURON_PROJECTION_REGENERATION	16	0.424934	1.2574	0.173653	1	1	2297	tags=44%, list=21%, signal=55%
GO_SULFUR_AMINO_ACID_BIOSYNTHETIC_PROCESS	16	0.452001	1.30593	0.175214	1	1	2866	tags=44%, list=26%, signal=59%
GO_NUCLEAR_SPECK	116	0.317146	1.26905	0.175476	1	1	2563	tags=32%, list=24%, signal=41%
GO_PML_BODY	41	0.322461	1.23302	0.17551	1	1	2543	tags=32%, list=23%, signal=41%
GO_POSITIVE_REGULATION_OF_CHROMOSOME_ORGANIZATION	86	0.320731	1.26005	0.175589	1	1	3545	tags=44%, list=33%, signal=65%
GO_EMBRYONIC_HEART_TUBE_DEVELOPMENT	43	0.348954	1.25278	0.175889	1	1	2040	tags=26%, list=19%, signal=31%
GO_EMBRYONIC_HEART_TUBE_MORPHOGENESIS	33	0.37105	1.25795	0.176	1	1	2040	tags=27%, list=19%, signal=34%
GO_REGULATION_OF_GENERATION_OF_PRECURSOR_METABOLITES_AND_ENERGY	51	0.33022	1.25314	0.176587	1	1	1540	tags=25%, list=14%, signal=30%
GO_BRUSH_BORDER	64	0.308617	1.19571	0.177043	1	1	2323	tags=30%, list=21%, signal=38%
GO_DIGESTION	79	0.360011	1.23446	0.177734	1	1	1357	tags=30%, list=13%, signal=34%
GO_CONDENSED_NUCLEAR_CHROMOSOME	45	0.37821	1.28898	0.179039	1	1	2346	tags=33%, list=22%, signal=42%
GO_DNA_DIRECTED_DNA_POLYMERASE_ACTIVITY	18	0.427283	1.28671	0.179916	1	1	5310	tags=78%, list=49%, signal=152%
GO_REGULATION_OF_POLYSACCHARIDE_METABOLIC_PROCESS	23	0.382941	1.25018	0.181087	1	1	1540	tags=26%, list=14%, signal=30%
GO_REGULATION_OF_CALCIUM_ION_TRANSMEMBRANE_TRANSPORTER_ACTIVITY	43	0.320177	1.18846	0.181263	1	1	2696	tags=40%, list=25%, signal=52%
GO_PROTEIN_SERINE_THREONINE_TYROSINE_KINASE_ACTIVITY	27	0.353329	1.24873	0.182	1	1	1872	tags=22%, list=17%, signal=27%
GO_INNER_EAR_RECEPTOR_CELL_DEVELOPMENT	16	0.432105	1.26058	0.183071	1	1	628	tags=25%, list=6%, signal=26%
GO_MANNOSYLATION	15	0.45333	1.2906	0.184369	1	1	2761	tags=47%, list=25%, signal=63%
GO_ACTIVATION_OF_CYSTEINE_TYPE_ENDOPEPTIDASE_ACTIVITY	56	0.311026	1.23243	0.184676	1	1	2310	tags=34%, list=21%, signal=43%
GO_RESPONSE_TO_INTERLEUKIN_6	17	0.409519	1.26146	0.185039	1	1	1851	tags=29%, list=17%, signal=35%
GO_CERAMIDE_BIOSYNTHETIC_PROCESS	24	0.451912	1.29827	0.185114	1	1	681	tags=25%, list=6%, signal=27%
GO_TRNA_MODIFICATION	28	0.429922	1.31565	0.186139	1	1	3893	tags=64%, list=36%, signal=100%
GO_LATERAL_PLASMA_MEMBRANE	29	0.413642	1.28896	0.186408	1	1	1964	tags=38%, list=18%, signal=46%
GO_PHOSPHATIDYLSERINE_BINDING	15	0.447237	1.2582	0.1875	1	1	732	tags=27%, list=7%, signal=29%
GO_MEMBRANE_LIPID_BIOSYNTHETIC_PROCESS	62	0.335501	1.23601	0.1875	1	1	1562	tags=24%, list=14%, signal=28%
GO_DNA_POLYMERASE_ACTIVITY	23	0.390319	1.25049	0.189765	1	1	4465	tags=52%, list=41%, signal=89%
GO_RIBONUCLEOPROTEIN_COMPLEX_BINDING	52	0.334502	1.25368	0.190184	1	1	2506	tags=38%, list=23%, signal=50%
GO_DESMOSOME	15	0.606268	1.34787	0.191406	1	1	2218	tags=53%, list=20%, signal=67%
GO_PEPTIDE_CROSS_LINKING	30	0.672107	1.39573	0.191651	1	1	1237	tags=70%, list=11%, signal=79%
GO_OUTER_MEMBRANE	90	0.283045	1.20066	0.191919	1	1	3906	tags=44%, list=36%, signal=69%
GO_MITOCHONDRION_ORGANIZATION	344	0.304161	1.25733	0.192469	1	1	3192	tags=38%, list=29%, signal=53%
GO_NEGATIVE_REGULATION_OF_RESPONSE_TO_DNA_DAMAGE_STIMULUS	34	0.336789	1.23361	0.192843	1	1	974	tags=18%, list=9%, signal=19%
GO_EAR_MORPHOGENESIS	66	0.332123	1.22885	0.193347	1	1	1822	tags=30%, list=17%, signal=36%
GO_POSITIVE_REGULATION_OF_DNA_REPAIR	22	0.386224	1.22809	0.193684	1	1	1363	tags=27%, list=13%, signal=31%
GO_ADP_METABOLIC_PROCESS	30	0.41052	1.29917	0.195609	1	1	2585	tags=40%, list=24%, signal=52%
GO_MLL1_2_COMPLEX	16	0.510108	1.33467	0.196203	1	1	2419	tags=56%, list=22%, signal=72%
GO_COFACTOR_BIOSYNTHETIC_PROCESS	78	0.356302	1.27786	0.196319	1	1	2867	tags=36%, list=26%, signal=48%
GO_CIRCADIAN_RHYTHM	79	0.301042	1.19133	0.196721	1	1	3517	tags=52%, list=32%, signal=76%
GO_POSITIVE_REGULATION_OF_DNA_TEMPLATED_TRANSCRIPTION_ELONGATION	15	0.441656	1.28893	0.19685	1	1	2804	tags=40%, list=26%, signal=54%
GO_PRERIBOSOME	31	0.471145	1.32248	0.197826	1	1	1828	tags=35%, list=17%, signal=43%
GO_ORGANIC_HYDROXY_COMPOUND_CATABOLIC_PROCESS	47	0.351727	1.2319	0.198077	1	1	1488	tags=26%, list=14%, signal=29%
GO_LONG_TERM_MEMORY	16	0.410209	1.21067	0.198077	1	1	3253	tags=63%, list=30%, signal=89%
GO_ORGANOPHOSPHATE_METABOLIC_PROCESS	496	0.256139	1.21732	0.198364	1	1	2630	tags=30%, list=24%, signal=38%
GO_MRNA_METABOLIC_PROCESS	339	0.318109	1.29023	0.2	1	1	3821	tags=47%, list=35%, signal=71%
GO_NUCLEOLAR_PART	34	0.432843	1.29666	0.200837	1	1	4166	tags=59%, list=38%, signal=95%
GO_RESPONSE_TO_RETINOIC_ACID	64	0.330997	1.21134	0.201942	1	1	1158	tags=25%, list=11%, signal=28%
GO_TRANSLATIONAL_ELONGATION	61	0.418992	1.33547	0.202105	1	1	3856	tags=49%, list=36%, signal=76%
GO_MICROTUBULE_BUNDLE_FORMATION	35	0.380084	1.25758	0.202729	1	1	3205	tags=49%, list=30%, signal=69%
GO_ENERGY_DERIVATION_BY_OXIDATION_OF_ORGANIC_COMPOUNDS	136	0.356765	1.29394	0.203822	1	1	2630	tags=38%, list=24%, signal=49%
GO_REGULATION_OF_THE_FORCE_OF_HEART_CONTRACTION	20	0.395708	1.20512	0.20428	1	1	1907	tags=35%, list=18%, signal=42%
GO_ELECTRON_TRANSPORT_CHAIN	59	0.491924	1.35211	0.205394	1	1	2630	tags=49%, list=24%, signal=65%
GO_DIENCEPHALON_DEVELOPMENT	45	0.343276	1.20038	0.205451	1	1	2688	tags=42%, list=25%, signal=56%
GO_OXIDOREDUCTASE_ACTIVITY_ACTING_ON_SINGLE_DONORS_WITH_INCORPORATION_OF_MOLECULAR_OXYGEN	17	0.418309	1.20957	0.206544	1	1	1163	tags=24%, list=11%, signal=26%
GO_CELLULAR_COMPONENT_DISASSEMBLY	307	0.242841	1.17052	0.207113	1	1	2643	tags=28%, list=24%, signal=36%
GO_S_ACYLTRANSFERASE_ACTIVITY	17	0.421617	1.24152	0.207392	1	1	4314	tags=65%, list=40%, signal=107%
GO_AUTOPHAGOSOME_MEMBRANE	19	0.394981	1.22765	0.208015	1	1	368	tags=21%, list=3%, signal=22%
GO_SMALL_RIBOSOMAL_SUBUNIT	39	0.482351	1.30857	0.208511	1	1	2971	tags=54%, list=27%, signal=74%
GO_REGULATION_OF_CATION_CHANNEL_ACTIVITY	46	0.32216	1.20337	0.208602	1	1	2696	tags=37%, list=25%, signal=49%
GO_CALCIUM_DEPENDENT_PROTEIN_BINDING	32	0.351895	1.18498	0.209677	1	1	2365	tags=38%, list=22%, signal=48%
GO_SNRNA_BINDING	17	0.444821	1.27725	0.210101	1	1	1832	tags=41%, list=17%, signal=49%
GO_REGULATION_OF_GLUCOSE_METABOLIC_PROCESS	65	0.285143	1.1607	0.210117	1	1	1224	tags=20%, list=11%, signal=22%
GO_OXIDATIVE_PHOSPHORYLATION	51	0.525956	1.36537	0.211934	1	1	3144	tags=59%, list=29%, signal=83%
GO_MITOCHONDRIAL_RESPIRATORY_CHAIN_COMPLEX_I_BIOGENESIS	39	0.526317	1.34965	0.212185	1	1	2081	tags=44%, list=19%, signal=54%
GO_STRUCTURAL_CONSTITUENT_OF_RIBOSOME	123	0.438781	1.35301	0.2125	1	1	3616	tags=55%, list=33%, signal=82%
GO_RENAL_WATER_HOMEOSTASIS	20	0.391293	1.19513	0.212766	1	1	1869	tags=35%, list=17%, signal=42%
GO_ESTABLISHMENT_OR_MAINTENANCE_OF_BIPOLAR_CELL_POLARITY	15	0.415024	1.21305	0.214429	1	1	868	tags=27%, list=8%, signal=29%
GO_AMINO_ACID_BINDING	56	0.302376	1.18032	0.214844	1	1	732	tags=16%, list=7%, signal=17%
GO_RIBONUCLEOPROTEIN_COMPLEX_BIOGENESIS	241	0.373215	1.3128	0.215031	1	1	2785	tags=38%, list=26%, signal=50%
GO_REGULATION_OF_SUBSTRATE_ADHESION_DEPENDENT_CELL_SPREADING	20	0.419568	1.21813	0.215447	1	1	2649	tags=40%, list=24%, signal=53%
GO_OXIDOREDUCTASE_ACTIVITY_ACTING_ON_NAD_P_H_QUINONE_OR_SIMILAR_COMPOUND_AS_ACCEPTOR	37	0.49704	1.3331	0.215606	1	1	2081	tags=43%, list=19%, signal=53%
GO_PROTEIN_KINASE_COMPLEX	56	0.289137	1.16285	0.216535	1	1	1367	tags=20%, list=13%, signal=22%
GO_NADP_METABOLIC_PROCESS	16	0.386168	1.20577	0.217204	1	1	1746	tags=44%, list=16%, signal=52%
GO_ONE_CARBON_METABOLIC_PROCESS	20	0.398206	1.20301	0.217899	1	1	1525	tags=25%, list=14%, signal=29%
GO_CHROMATIN_ORGANIZATION	368	0.273453	1.21257	0.218107	1	1	3543	tags=40%, list=33%, signal=57%
GO_ACETYLCHOLINE_BINDING	15	0.430078	1.20813	0.218504	1	1	1382	tags=40%, list=13%, signal=46%
GO_REGULATION_OF_TOR_SIGNALING	34	0.349643	1.21261	0.219231	1	1	4042	tags=47%, list=37%, signal=75%
GO_RNA_HELICASE_ACTIVITY	42	0.377543	1.26569	0.219917	1	1	3774	tags=48%, list=35%, signal=73%
GO_PEPTIDYL_LYSINE_MODIFICATION	172	0.294178	1.21946	0.219917	1	1	3485	tags=41%, list=32%, signal=60%
GO_CELLULAR_RESPONSE_TO_HYDROGEN_PEROXIDE	38	0.325237	1.18944	0.22179	1	1	2810	tags=37%, list=26%, signal=50%
GO_COENZYME_METABOLIC_PROCESS	137	0.305129	1.21098	0.224101	1	1	2655	tags=34%, list=25%, signal=45%
GO_CELL_PROJECTION_ASSEMBLY	144	0.252619	1.13458	0.224242	1	1	2732	tags=28%, list=25%, signal=38%
GO_RESPONSE_TO_LIGHT_STIMULUS	158	0.238975	1.14365	0.224532	1	1	3409	tags=39%, list=31%, signal=56%
GO_THIOL_DEPENDENT_UBIQUITIN_SPECIFIC_PROTEASE_ACTIVITY	32	0.351845	1.20592	0.224806	1	1	2466	tags=34%, list=23%, signal=44%
GO_CARDIAC_CELL_DEVELOPMENT	26	0.424168	1.23644	0.226263	1	1	557	tags=23%, list=5%, signal=24%
GO_DNA_METHYLATION_OR_DEMETHYLATION	36	0.354477	1.20729	0.226891	1	1	2048	tags=33%, list=19%, signal=41%
GO_PROTEIN_ACETYLATION	79	0.296156	1.19523	0.227092	1	1	3770	tags=47%, list=35%, signal=71%
GO_SODIUM_CHANNEL_REGULATOR_ACTIVITY	18	0.392187	1.18968	0.228916	1	1	1872	tags=39%, list=17%, signal=47%
GO_PEPTIDE_N_ACETYLTRANSFERASE_ACTIVITY	35	0.356992	1.21779	0.229376	1	1	3879	tags=54%, list=36%, signal=84%
GO_ZYMOGEN_ACTIVATION	67	0.297943	1.18315	0.230469	1	1	2112	tags=31%, list=20%, signal=39%
GO_UBIQUITIN_LIKE_PROTEIN_BINDING	63	0.280078	1.17214	0.230608	1	1	3831	tags=44%, list=35%, signal=68%
GO_RNA_METHYLTRANSFERASE_ACTIVITY	17	0.427926	1.23471	0.231405	1	1	3893	tags=59%, list=36%, signal=92%
GO_SMOOTH_MUSCLE_CONTRACTION	29	0.363991	1.19	0.232246	1	1	3028	tags=55%, list=28%, signal=76%
GO_ENDOSOME_ORGANIZATION	36	0.335106	1.17559	0.232514	1	1	2931	tags=42%, list=27%, signal=57%
GO_NUCLEOPLASM_PART	376	0.259601	1.17186	0.235169	1	1	3479	tags=39%, list=32%, signal=55%
GO_TERMINATION_OF_RNA_POLYMERASE_II_TRANSCRIPTION	37	0.36305	1.19596	0.236443	1	1	2915	tags=41%, list=27%, signal=55%
GO_BINDING_OF_SPERM_TO_ZONA_PELLUCIDA	22	0.381637	1.20499	0.237113	1	1	1289	tags=27%, list=12%, signal=31%
GO_OXIDOREDUCTASE_ACTIVITY_ACTING_ON_THE_ALDEHYDE_OR_OXO_GROUP_OF_DONORS_NAD_OR_NADP_AS_ACCEPTOR	23	0.384374	1.18639	0.237395	1	1	360	tags=17%, list=3%, signal=18%
GO_UNSATURATED_FATTY_ACID_METABOLIC_PROCESS	53	0.36947	1.1827	0.238095	1	1	1599	tags=32%, list=15%, signal=37%
GO_S_ADENOSYLMETHIONINE_DEPENDENT_METHYLTRANSFERASE_ACTIVITY	63	0.299506	1.16683	0.238289	1	1	2967	tags=38%, list=27%, signal=52%
GO_CELLULAR_RESPONSE_TO_GLUCOSE_STARVATION	19	0.380484	1.16742	0.238748	1	1	1405	tags=32%, list=13%, signal=36%
GO_ORGANELLE_ASSEMBLY	277	0.230522	1.12488	0.238994	1	1	2737	tags=30%, list=25%, signal=39%
GO_POSITIVE_REGULATION_OF_INTERLEUKIN_1_PRODUCTION	16	0.461672	1.23438	0.239464	1	1	1375	tags=38%, list=13%, signal=43%
GO_REGULATION_OF_VIRAL_RELEASE_FROM_HOST_CELL	15	0.410732	1.1712	0.240385	1	1	1312	tags=33%, list=12%, signal=38%
GO_PIGMENT_METABOLIC_PROCESS	33	0.417132	1.24225	0.240506	1	1	2177	tags=33%, list=20%, signal=42%
GO_PROTEIN_ACYLATION	97	0.276412	1.17514	0.243461	1	1	3927	tags=47%, list=36%, signal=74%
GO_NEGATIVE_REGULATION_OF_BLOOD_CIRCULATION	17	0.389657	1.16987	0.244318	1	1	1687	tags=29%, list=16%, signal=35%
GO_MACROMOLECULAR_COMPLEX_DISASSEMBLY	110	0.298826	1.19342	0.244681	1	1	3543	tags=37%, list=33%, signal=55%
GO_MITOCHONDRIAL_PROTEIN_COMPLEX	85	0.441632	1.29725	0.245283	1	1	3773	tags=56%, list=35%, signal=86%
GO_PHOSPHOLIPID_METABOLIC_PROCESS	205	0.236628	1.1143	0.245902	1	1	2065	tags=22%, list=19%, signal=27%
GO_MUSCLE_CELL_DEVELOPMENT	72	0.309709	1.15556	0.246032	1	1	2577	tags=36%, list=24%, signal=47%
GO_MECHANORECEPTOR_DIFFERENTIATION	25	0.369878	1.18823	0.246407	1	1	663	tags=20%, list=6%, signal=21%
GO_QUATERNARY_AMMONIUM_GROUP_BINDING	22	0.375956	1.17582	0.247082	1	1	1382	tags=32%, list=13%, signal=36%
GO_NEGATIVE_REGULATION_OF_RECEPTOR_ACTIVITY	19	0.396297	1.20455	0.247357	1	1	1658	tags=26%, list=15%, signal=31%
GO_NUCLEOBASE_CONTAINING_SMALL_MOLECULE_METABOLIC_PROCESS	297	0.275801	1.20258	0.247401	1	1	2630	tags=32%, list=24%, signal=42%
GO_VOLTAGE_GATED_CALCIUM_CHANNEL_COMPLEX	23	0.394337	1.18091	0.247465	1	1	1690	tags=35%, list=16%, signal=41%
GO_GLYCEROPHOSPHOLIPID_METABOLIC_PROCESS	171	0.236843	1.11661	0.248148	1	1	2065	tags=22%, list=19%, signal=27%
GO_BINDING_BRIDGING	101	0.273678	1.15677	0.249077	1	1	1907	tags=23%, list=18%, signal=27%
GO_ACETYLTRANSFERASE_COMPLEX	56	0.316338	1.19122	0.25	1	1	2419	tags=32%, list=22%, signal=41%
GO_SARCOPLASM	36	0.3231	1.15232	0.25	1	1	2172	tags=31%, list=20%, signal=38%
GO_RRNA_BINDING	32	0.417297	1.23329	0.251037	1	1	2971	tags=47%, list=27%, signal=64%
GO_CYTOPLASMIC_PATTERN_RECOGNITION_RECEPTOR_SIGNALING_PATHWAY	15	0.424581	1.20135	0.251429	1	1	3835	tags=47%, list=35%, signal=72%
GO_FATTY_ACID_TRANSPORT	37	0.320468	1.14201	0.252354	1	1	1224	tags=22%, list=11%, signal=24%
GO_NEURAL_NUCLEUS_DEVELOPMENT	31	0.346214	1.19221	0.252723	1	1	2494	tags=39%, list=23%, signal=50%
GO_MIDBRAIN_DEVELOPMENT	53	0.284874	1.13438	0.253165	1	1	2630	tags=36%, list=24%, signal=47%
GO_NUCLEOSIDE_TRIPHOSPHATE_METABOLIC_PROCESS	136	0.366358	1.24785	0.254132	1	1	3144	tags=44%, list=29%, signal=61%
GO_SYNCYTIUM_FORMATION	16	0.432519	1.16666	0.254403	1	1	650	tags=25%, list=6%, signal=27%
GO_GPI_ANCHOR_METABOLIC_PROCESS	18	0.41901	1.21408	0.25523	1	1	1928	tags=28%, list=18%, signal=34%
GO_CUL4_RING_E3_UBIQUITIN_LIGASE_COMPLEX	16	0.414639	1.1799	0.255274	1	1	2087	tags=38%, list=19%, signal=46%
GO_NUCLEOTIDE_PHOSPHORYLATION	37	0.363087	1.18473	0.256098	1	1	3079	tags=43%, list=28%, signal=60%
GO_GLUCOSE_6_PHOSPHATE_METABOLIC_PROCESS	16	0.414899	1.18333	0.256303	1	1	2384	tags=50%, list=22%, signal=64%
GO_REGULATION_OF_PROTEIN_EXPORT_FROM_NUCLEUS	19	0.361519	1.1582	0.256809	1	1	3332	tags=47%, list=31%, signal=68%
GO_RNA_SPLICING	196	0.29863	1.18645	0.257384	1	1	3685	tags=47%, list=34%, signal=70%
GO_RESPONSE_TO_RADIATION	234	0.220597	1.10169	0.257576	1	1	3424	tags=37%, list=32%, signal=53%
GO_MITOTIC_SPINDLE	31	0.363079	1.19738	0.258	1	1	3076	tags=42%, list=28%, signal=58%
GO_ANTERIOR_POSTERIOR_AXIS_SPECIFICATION	32	0.34444	1.1522	0.258	1	1	1730	tags=28%, list=16%, signal=33%
GO_CHANNEL_REGULATOR_ACTIVITY	79	0.267305	1.10766	0.258383	1	1	3320	tags=41%, list=31%, signal=58%
GO_CELLULAR_RESPONSE_TO_RETINOIC_ACID	41	0.358363	1.17716	0.258893	1	1	1044	tags=27%, list=10%, signal=30%
GO_COVALENT_CHROMATIN_MODIFICATION	191	0.265187	1.14226	0.259109	1	1	3405	tags=39%, list=31%, signal=56%
GO_CARBOHYDRATE_CATABOLIC_PROCESS	72	0.292387	1.13533	0.261386	1	1	2585	tags=38%, list=24%, signal=49%
GO_MULTI_MULTICELLULAR_ORGANISM_PROCESS	122	0.26523	1.10436	0.261811	1	1	2541	tags=33%, list=23%, signal=42%
GO_SECRETORY_GRANULE_MEMBRANE	39	0.322299	1.16566	0.262525	1	1	1102	tags=21%, list=10%, signal=23%
GO_RESPIRATORY_GASEOUS_EXCHANGE	29	0.346522	1.16659	0.262646	1	1	1015	tags=21%, list=9%, signal=23%
GO_COFACTOR_TRANSPORT	16	0.425109	1.16994	0.263366	1	1	1618	tags=38%, list=15%, signal=44%
GO_AMIDE_BIOSYNTHETIC_PROCESS	285	0.324755	1.21534	0.264392	1	1	3530	tags=42%, list=33%, signal=61%
GO_CILIARY_PLASM	50	0.332762	1.17188	0.265347	1	1	2994	tags=38%, list=28%, signal=52%
GO_REGULATION_OF_WOUND_HEALING	65	0.351141	1.18935	0.266667	1	1	1493	tags=32%, list=14%, signal=37%
GO_CELLULAR_METABOLIC_COMPOUND_SALVAGE	24	0.360549	1.16203	0.268041	1	1	3240	tags=38%, list=30%, signal=53%
GO_SYNAPTIC_TRANSMISSION_CHOLINERGIC	21	0.37004	1.15465	0.268145	1	1	1382	tags=33%, list=13%, signal=38%
GO_REGULATION_OF_VASODILATION	30	0.350481	1.15469	0.269841	1	1	1852	tags=33%, list=17%, signal=40%
GO_COFACTOR_METABOLIC_PROCESS	175	0.289111	1.14721	0.269874	1	1	2371	tags=31%, list=22%, signal=39%
GO_SPHINGOLIPID_BIOSYNTHETIC_PROCESS	41	0.350076	1.16001	0.271154	1	1	1562	tags=27%, list=14%, signal=31%
GO_NUCLEOLUS	483	0.249117	1.13766	0.271186	1	1	2936	tags=31%, list=27%, signal=41%
GO_RIBONUCLEOPROTEIN_COMPLEX	407	0.28711	1.17605	0.271222	1	1	3904	tags=44%, list=36%, signal=67%
GO_ISOPRENOID_BINDING	22	0.395027	1.16516	0.272177	1	1	3551	tags=59%, list=33%, signal=88%
GO_REGULATION_OF_MEMBRANE_REPOLARIZATION	18	0.378699	1.16139	0.272727	1	1	2541	tags=33%, list=23%, signal=43%
GO_CARDIOCYTE_DIFFERENTIATION	59	0.306744	1.13001	0.274354	1	1	2541	tags=31%, list=23%, signal=40%
GO_PEPTIDASE_INHIBITOR_ACTIVITY	105	0.310551	1.13629	0.27451	1	1	1762	tags=30%, list=16%, signal=35%
GO_RIBONUCLEASE_ACTIVITY	55	0.282255	1.10793	0.274793	1	1	2225	tags=25%, list=21%, signal=32%
GO_DNA_REPAIR_COMPLEX	25	0.355397	1.15912	0.27521	1	1	4519	tags=56%, list=42%, signal=96%
GO_FATTY_ACID_METABOLIC_PROCESS	152	0.287481	1.13607	0.275391	1	1	2073	tags=28%, list=19%, signal=34%
GO_RESPONSE_TO_INCREASED_OXYGEN_LEVELS	15	0.370675	1.14295	0.276342	1	1	1746	tags=27%, list=16%, signal=32%
GO_PHOTOPERIODISM	15	0.415177	1.16344	0.277778	1	1	3165	tags=60%, list=29%, signal=85%
GO_LONG_CHAIN_FATTY_ACID_TRANSPORT	28	0.331412	1.14395	0.277883	1	1	2810	tags=39%, list=26%, signal=53%
GO_PHENOL_CONTAINING_COMPOUND_METABOLIC_PROCESS	43	0.30046	1.12026	0.28	1	1	2696	tags=33%, list=25%, signal=43%
GO_SMALL_NUCLEAR_RIBONUCLEOPROTEIN_COMPLEX	33	0.36963	1.15582	0.280353	1	1	2553	tags=36%, list=24%, signal=47%
GO_KINESIN_BINDING	17	0.398599	1.18347	0.281071	1	1	417	tags=12%, list=4%, signal=12%
GO_MITOCHONDRIAL_MEMBRANE_PART	104	0.394655	1.21405	0.281513	1	1	2908	tags=39%, list=27%, signal=53%
GO_DEFENSE_RESPONSE_TO_GRAM_POSITIVE_BACTERIUM	35	0.330594	1.12965	0.282004	1	1	1170	tags=23%, list=11%, signal=26%
GO_REGULATION_OF_SMOOTHENED_SIGNALING_PATHWAY	44	0.32972	1.12963	0.282105	1	1	2038	tags=30%, list=19%, signal=36%
GO_ACTIVATION_OF_GTPASE_ACTIVITY	45	0.328816	1.14951	0.282288	1	1	3167	tags=36%, list=29%, signal=50%
GO_NEUTRAL_LIPID_CATABOLIC_PROCESS	15	0.408257	1.15621	0.282772	1	1	2863	tags=47%, list=26%, signal=63%
GO_MEMBRANE_DISASSEMBLY	26	0.376901	1.17556	0.283096	1	1	3556	tags=46%, list=33%, signal=69%
GO_TRANSFERASE_ACTIVITY_TRANSFERRING_ONE_CARBON_GROUPS	104	0.252734	1.10256	0.283644	1	1	2729	tags=33%, list=25%, signal=43%
GO_SPLICEOSOMAL_COMPLEX	95	0.31801	1.15379	0.283871	1	1	3685	tags=47%, list=34%, signal=71%
GO_REGULATION_OF_LIPID_TRANSPORT	54	0.288734	1.09684	0.284615	1	1	2060	tags=30%, list=19%, signal=36%
GO_TETRAPYRROLE_BINDING	74	0.314931	1.10974	0.284895	1	1	2297	tags=34%, list=21%, signal=43%
GO_PROTEIN_DISULFIDE_OXIDOREDUCTASE_ACTIVITY	15	0.407847	1.14838	0.285714	1	1	2930	tags=47%, list=27%, signal=64%
GO_REGULATION_OF_INTRINSIC_APOPTOTIC_SIGNALING_PATHWAY_IN_RESPONSE_TO_DNA_DAMAGE	22	0.356449	1.13747	0.28827	1	1	1722	tags=27%, list=16%, signal=32%
GO_MONOSACCHARIDE_METABOLIC_PROCESS	125	0.27311	1.1172	0.288499	1	1	2597	tags=35%, list=24%, signal=46%
GO_HISTONE_PHOSPHORYLATION	15	0.421268	1.15337	0.288703	1	1	3181	tags=47%, list=29%, signal=66%
GO_REGULATION_OF_FATTY_ACID_TRANSPORT	17	0.389537	1.12926	0.289206	1	1	1326	tags=35%, list=12%, signal=40%
GO_MITOCHONDRION_LOCALIZATION	20	0.36044	1.14445	0.290019	1	1	2572	tags=40%, list=24%, signal=52%
GO_HYDROLASE_ACTIVITY_ACTING_ON_CARBON_NITROGEN_BUT_NOT_PEPTIDE_BONDS_IN_LINEAR_AMIDES	49	0.274288	1.1061	0.290909	1	1	3814	tags=49%, list=35%, signal=75%
GO_NEGATIVE_REGULATION_OF_MITOCHONDRION_ORGANIZATION	23	0.383059	1.17422	0.291089	1	1	2060	tags=30%, list=19%, signal=38%
GO_RECEPTOR_SIGNALING_COMPLEX_SCAFFOLD_ACTIVITY	18	0.369086	1.13975	0.291209	1	1	3865	tags=44%, list=36%, signal=69%
GO_TRNA_TRANSPORT	19	0.415101	1.15881	0.292208	1	1	4970	tags=79%, list=46%, signal=146%
GO_MOTILE_CILIUM	60	0.299424	1.13049	0.292434	1	1	2497	tags=30%, list=23%, signal=39%
GO_CLUSTER_OF_ACTIN_BASED_CELL_PROJECTIONS	84	0.257504	1.07438	0.293006	1	1	1884	tags=23%, list=17%, signal=27%
GO_GLUCOSE_METABOLIC_PROCESS	84	0.286984	1.13453	0.293069	1	1	2597	tags=35%, list=24%, signal=45%
GO_RETINA_HOMEOSTASIS	33	0.331943	1.10046	0.293069	1	1	2804	tags=39%, list=26%, signal=53%
GO_RNA_PHOSPHODIESTER_BOND_HYDROLYSIS	66	0.285251	1.12171	0.293103	1	1	2848	tags=30%, list=26%, signal=41%
GO_AXIS_SPECIFICATION	60	0.285869	1.10485	0.293413	1	1	2390	tags=27%, list=22%, signal=34%
GO_RESPONSE_TO_THYROID_HORMONE	15	0.380127	1.13528	0.293774	1	1	2281	tags=33%, list=21%, signal=42%
GO_FATTY_ACID_BIOSYNTHETIC_PROCESS	52	0.305432	1.106	0.294695	1	1	2371	tags=33%, list=22%, signal=42%
GO_POSITIVE_REGULATION_OF_OXIDOREDUCTASE_ACTIVITY	28	0.335093	1.11418	0.296	1	1	2365	tags=29%, list=22%, signal=36%
GO_BLASTOCYST_FORMATION	16	0.395401	1.14665	0.296078	1	1	3239	tags=50%, list=30%, signal=71%
GO_BODY_FLUID_SECRETION	36	0.336626	1.11844	0.297619	1	1	2746	tags=44%, list=25%, signal=59%
GO_POSITIVE_REGULATION_OF_SMOOTHENED_SIGNALING_PATHWAY	17	0.389716	1.14296	0.297917	1	1	2975	tags=53%, list=27%, signal=73%
GO_RNA_SPLICING_VIA_TRANSESTERIFICATION_REACTIONS	147	0.28952	1.1174	0.299145	1	1	3685	tags=46%, list=34%, signal=68%
GO_PRE_AUTOPHAGOSOMAL_STRUCTURE	21	0.368141	1.13505	0.299435	1	1	745	tags=24%, list=7%, signal=26%
GO_CELLULAR_PROTEIN_COMPLEX_DISASSEMBLY	71	0.346509	1.17154	0.300654	1	1	3530	tags=38%, list=33%, signal=56%
GO_SUBSTANTIA_NIGRA_DEVELOPMENT	22	0.365896	1.14007	0.301075	1	1	2494	tags=41%, list=23%, signal=53%
GO_N_ACYLTRANSFERASE_ACTIVITY	59	0.281386	1.0987	0.304	1	1	3923	tags=49%, list=36%, signal=77%
GO_MITOCHONDRIAL_TRANSLATION	60	0.38804	1.18738	0.304255	1	1	3856	tags=45%, list=36%, signal=70%
GO_INNER_MITOCHONDRIAL_MEMBRANE_PROTEIN_COMPLEX	66	0.446088	1.20868	0.304622	1	1	3737	tags=56%, list=35%, signal=85%
GO_CARDIAC_MUSCLE_CELL_DIFFERENTIATION	46	0.311871	1.08831	0.304688	1	1	2541	tags=35%, list=23%, signal=45%
GO_CELLULAR_CARBOHYDRATE_METABOLIC_PROCESS	97	0.2598	1.08889	0.305051	1	1	2385	tags=29%, list=22%, signal=37%
GO_DNA_ALKYLATION	29	0.355412	1.14131	0.306122	1	1	2048	tags=34%, list=19%, signal=42%
GO_CHROMOSOME_ORGANIZATION_INVOLVED_IN_MEIOTIC_CELL_CYCLE	28	0.334301	1.10955	0.306554	1	1	2346	tags=32%, list=22%, signal=41%
GO_MODIFIED_AMINO_ACID_BINDING	35	0.30773	1.09276	0.306667	1	1	732	tags=17%, list=7%, signal=18%
GO_RIBOSOME	130	0.387768	1.20423	0.307531	1	1	2785	tags=41%, list=26%, signal=54%
GO_DEFENSE_RESPONSE_TO_FUNGUS	20	0.433181	1.12102	0.307692	1	1	1510	tags=45%, list=14%, signal=52%
GO_REGULATION_OF_CARBOHYDRATE_CATABOLIC_PROCESS	25	0.329416	1.10144	0.308943	1	1	1149	tags=24%, list=11%, signal=27%
GO_ORGANELLE_INNER_MEMBRANE	286	0.318037	1.15453	0.308977	1	1	3223	tags=39%, list=30%, signal=54%
GO_REGULATION_OF_CHROMATIN_ORGANIZATION	96	0.264214	1.10887	0.309572	1	1	3543	tags=40%, list=33%, signal=58%
GO_PROTEIN_DEACETYLASE_ACTIVITY	23	0.328278	1.10372	0.310413	1	1	3814	tags=57%, list=35%, signal=87%
GO_GLYCOSYL_COMPOUND_METABOLIC_PROCESS	206	0.274498	1.10922	0.310417	1	1	2630	tags=32%, list=24%, signal=42%
GO_UNFOLDED_PROTEIN_BINDING	60	0.314117	1.11061	0.311688	1	1	2548	tags=37%, list=24%, signal=48%
GO_MITOCHONDRIAL_RESPIRATORY_CHAIN_COMPLEX_ASSEMBLY	46	0.444576	1.19589	0.311983	1	1	2081	tags=37%, list=19%, signal=46%
GO_POSITIVE_REGULATION_OF_INTRINSIC_APOPTOTIC_SIGNALING_PATHWAY	32	0.317061	1.11452	0.312139	1	1	4119	tags=56%, list=38%, signal=91%
GO_FATTY_ACID_DERIVATIVE_TRANSPORT	16	0.39496	1.12433	0.312621	1	1	2696	tags=44%, list=25%, signal=58%
GO_VISUAL_BEHAVIOR	30	0.313802	1.10306	0.312625	1	1	2503	tags=33%, list=23%, signal=43%
GO_DEMETHYLATION	31	0.348003	1.11617	0.313131	1	1	3814	tags=39%, list=35%, signal=60%
GO_RESPIRATORY_CHAIN	55	0.453841	1.20807	0.313684	1	1	2889	tags=47%, list=27%, signal=64%
GO_CELLULAR_RESPONSE_TO_LIGHT_STIMULUS	47	0.280183	1.09181	0.313765	1	1	4315	tags=53%, list=40%, signal=88%
GO_ENZYME_INHIBITOR_ACTIVITY	208	0.242892	1.08296	0.315175	1	1	1794	tags=24%, list=17%, signal=28%
GO_AXONEME_ASSEMBLY	25	0.388977	1.14461	0.315476	1	1	2414	tags=40%, list=22%, signal=51%
GO_POSITIVE_REGULATION_OF_CELLULAR_COMPONENT_BIOGENESIS	207	0.21794	1.06691	0.315488	1	1	3033	tags=32%, list=28%, signal=43%
GO_THIOESTER_BIOSYNTHETIC_PROCESS	20	0.400833	1.13689	0.315895	1	1	1456	tags=30%, list=13%, signal=35%
GO_PROTEIN_SERINE_THREONINE_PHOSPHATASE_ACTIVITY	43	0.275209	1.07445	0.316206	1	1	2609	tags=30%, list=24%, signal=40%
GO_MEIOSIS_I	46	0.313147	1.11324	0.317125	1	1	3454	tags=39%, list=32%, signal=57%
GO_NADH_DEHYDROGENASE_COMPLEX	31	0.492814	1.18797	0.317697	1	1	2081	tags=45%, list=19%, signal=56%
GO_POSITIVE_REGULATION_OF_HISTONE_METHYLATION	23	0.367651	1.12006	0.31828	1	1	3479	tags=43%, list=32%, signal=64%
GO_POSITIVE_REGULATION_OF_GLUCOSE_METABOLIC_PROCESS	20	0.362192	1.11591	0.318359	1	1	1045	tags=25%, list=10%, signal=28%
GO_TRNA_METABOLIC_PROCESS	95	0.319223	1.13591	0.318872	1	1	3263	tags=40%, list=30%, signal=57%
GO_MITOCHONDRIAL_ENVELOPE	386	0.286793	1.11312	0.319588	1	1	3192	tags=36%, list=29%, signal=50%
GO_REGULATION_OF_TRANSPORTER_ACTIVITY	103	0.247486	1.06691	0.320166	1	1	2696	tags=31%, list=25%, signal=41%
GO_HORMONE_ACTIVITY	42	0.334746	1.08812	0.321353	1	1	2541	tags=38%, list=23%, signal=50%
GO_RIBOSOMAL_SUBUNIT	99	0.427399	1.2226	0.321503	1	1	3530	tags=55%, list=33%, signal=80%
GO_RENAL_SYSTEM_PROCESS_INVOLVED_IN_REGULATION_OF_SYSTEMIC_ARTERIAL_BLOOD_PRESSURE	15	0.437561	1.11331	0.322581	1	1	1326	tags=33%, list=12%, signal=38%
GO_NUCLEAR_EXPORT	87	0.281689	1.10262	0.322917	1	1	2937	tags=36%, list=27%, signal=49%
GO_HISTONE_H4_ACETYLATION	31	0.330112	1.10762	0.323171	1	1	2257	tags=35%, list=21%, signal=45%
GO_CYCLIN_DEPENDENT_PROTEIN_KINASE_HOLOENZYME_COMPLEX	18	0.3477	1.11078	0.324111	1	1	1367	tags=22%, list=13%, signal=25%
GO_PROTEIN_MODIFICATION_BY_SMALL_PROTEIN_REMOVAL	62	0.286607	1.10861	0.324272	1	1	3228	tags=37%, list=30%, signal=53%
GO_REGULATION_OF_RELEASE_OF_CYTOCHROME_C_FROM_MITOCHONDRIA	27	0.390868	1.12095	0.32438	1	1	2670	tags=44%, list=25%, signal=59%
GO_RESPONSE_TO_TESTOSTERONE	24	0.328434	1.06839	0.325188	1	1	2060	tags=25%, list=19%, signal=31%
GO_REGULATION_OF_MITOCHONDRION_ORGANIZATION	121	0.266062	1.09869	0.325773	1	1	2288	tags=26%, list=21%, signal=32%
GO_CORONARY_VASCULATURE_DEVELOPMENT	15	0.403949	1.11207	0.326172	1	1	1554	tags=33%, list=14%, signal=39%
GO_LARGE_RIBOSOMAL_SUBUNIT	60	0.442588	1.2007	0.326964	1	1	4576	tags=77%, list=42%, signal=132%
GO_CELL_FATE_SPECIFICATION	34	0.326533	1.10134	0.327381	1	1	2642	tags=35%, list=24%, signal=47%
GO_PEPTIDASE_REGULATOR_ACTIVITY	128	0.279411	1.09378	0.327586	1	1	1449	tags=24%, list=13%, signal=28%
GO_TISSUE_HOMEOSTASIS	93	0.257	1.08322	0.329044	1	1	1898	tags=25%, list=18%, signal=30%
GO_PURINE_CONTAINING_COMPOUND_METABOLIC_PROCESS	226	0.263618	1.09934	0.329193	1	1	2630	tags=32%, list=24%, signal=42%
GO_CELLULAR_RESPIRATION	87	0.389422	1.17044	0.329854	1	1	3144	tags=47%, list=29%, signal=66%
GO_SPERM_MOTILITY	27	0.325254	1.086	0.329854	1	1	3123	tags=41%, list=29%, signal=57%
GO_CELLULAR_RESPONSE_TO_REACTIVE_OXYGEN_SPECIES	67	0.258768	1.07176	0.330709	1	1	3063	tags=36%, list=28%, signal=50%
GO_MONOCARBOXYLIC_ACID_METABOLIC_PROCESS	263	0.250944	1.08462	0.331984	1	1	2109	tags=26%, list=19%, signal=31%
GO_ORGANIC_CYCLIC_COMPOUND_CATABOLIC_PROCESS	248	0.250221	1.07502	0.333333	1	1	2453	tags=27%, list=23%, signal=34%
GO_ENDOSOME_TO_LYSOSOME_TRANSPORT	25	0.336105	1.09486	0.334646	1	1	1377	tags=20%, list=13%, signal=23%
GO_DEVELOPMENTAL_INDUCTION	17	0.374721	1.09604	0.334686	1	1	3232	tags=53%, list=30%, signal=75%
GO_REGULATION_OF_COAGULATION	43	0.371732	1.1273	0.335196	1	1	1480	tags=35%, list=14%, signal=40%
GO_NEUROTRANSMITTER_BINDING	19	0.357229	1.09046	0.336538	1	1	1382	tags=32%, list=13%, signal=36%
GO_NEURONAL_POSTSYNAPTIC_DENSITY	31	0.322063	1.08736	0.336576	1	1	56	tags=10%, list=1%, signal=10%
GO_PROTEIN_MATURATION	154	0.247138	1.07703	0.337209	1	1	1856	tags=25%, list=17%, signal=29%
GO_SIGNAL_RELEASE	87	0.25451	1.07495	0.337864	1	1	1028	tags=21%, list=9%, signal=23%
GO_RESPONSE_TO_ACTIVITY	43	0.292669	1.06667	0.337945	1	1	2001	tags=28%, list=18%, signal=34%
GO_NEURON_DEATH	30	0.293454	1.06736	0.339468	1	1	2552	tags=30%, list=24%, signal=39%
GO_INO80_TYPE_COMPLEX	18	0.383971	1.11179	0.339785	1	1	2141	tags=33%, list=20%, signal=41%
GO_MACROAUTOPHAGY	160	0.235867	1.08069	0.339844	1	1	2669	tags=29%, list=25%, signal=38%
GO_MICROTUBULE_POLYMERIZATION_OR_DEPOLYMERIZATION	21	0.34015	1.09412	0.340956	1	1	4455	tags=71%, list=41%, signal=121%
GO_POSITIVE_REGULATION_OF_VIRAL_TRANSCRIPTION	15	0.367435	1.08994	0.34322	1	1	3072	tags=47%, list=28%, signal=65%
GO_SKIN_EPIDERMIS_DEVELOPMENT	38	0.351572	1.09305	0.343434	1	1	2552	tags=39%, list=24%, signal=51%
GO_VENTRICULAR_SYSTEM_DEVELOPMENT	15	0.365194	1.0779	0.343685	1	1	682	tags=20%, list=6%, signal=21%
GO_NUCLEAR_TRANSCRIBED_MRNA_CATABOLIC_PROCESS_NONSENSE_MEDIATED_DECAY	75	0.417329	1.18193	0.345455	1	1	3467	tags=52%, list=32%, signal=76%
GO_REGULATION_OF_RYANODINE_SENSITIVE_CALCIUM_RELEASE_CHANNEL_ACTIVITY	16	0.372706	1.09831	0.345833	1	1	726	tags=19%, list=7%, signal=20%
GO_EMBRYONIC_PLACENTA_DEVELOPMENT	47	0.311525	1.08144	0.346535	1	1	1363	tags=23%, list=13%, signal=27%
GO_DEMETHYLASE_ACTIVITY	21	0.366945	1.08889	0.348	1	1	3210	tags=33%, list=30%, signal=47%
GO_REPLISOME	15	0.415418	1.11453	0.349206	1	1	4428	tags=67%, list=41%, signal=113%
GO_POSITIVE_REGULATION_OF_RESPONSE_TO_DNA_DAMAGE_STIMULUS	36	0.283125	1.0681	0.349301	1	1	1363	tags=22%, list=13%, signal=25%
GO_RNA_POLYMERASE_COMPLEX	63	0.291286	1.07807	0.350622	1	1	3880	tags=49%, list=36%, signal=76%
GO_NEUROEPITHELIAL_CELL_DIFFERENTIATION	31	0.307318	1.08464	0.352697	1	1	2520	tags=32%, list=23%, signal=42%
GO_CELLULAR_RESPONSE_TO_OXIDATIVE_STRESS	114	0.23412	1.05774	0.353167	1	1	3222	tags=35%, list=30%, signal=49%
GO_EXTRINSIC_COMPONENT_OF_ORGANELLE_MEMBRANE	15	0.369165	1.07808	0.353516	1	1	3886	tags=47%, list=36%, signal=73%
GO_ESTABLISHMENT_OF_PROTEIN_LOCALIZATION_TO_ORGANELLE	211	0.262625	1.07659	0.353814	1	1	2971	tags=35%, list=27%, signal=47%
GO_NUCLEOSIDE_MONOPHOSPHATE_METABOLIC_PROCESS	141	0.313588	1.09307	0.355042	1	1	2630	tags=35%, list=24%, signal=45%
GO_BLASTOCYST_DEVELOPMENT	39	0.301372	1.08223	0.355556	1	1	3684	tags=46%, list=34%, signal=70%
[truncated: 1,198 more rows]

## Sheet: Low expression of STAT3
Table SI. GSEA Gene Ontology results. GSEA outcomes of the c2 (c2.all.v6.1.symbols.gmt) reference gene set for the key genes in the Janus kinase-signal transducer and activator of transcription signaling pathway in skin cutaneous melanoma. GSEA, gene set enrichment analysis. GSEA, gene set enrich analysis; GO, gene ontology; ES, enrichment score; NES, normalized enrichment score; NOM, nominal; FD…
[truncated: 1,689 more rows]

[truncated: 6 more sheets: High expression of STAT4, Low expression of STAT4, High expression of STAT5B, Low expression of STAT5B, High expression of STAT6, Low expression of STAT6]
